# Supplementary material for: A combined flow injection/reversed-phase chromatography–high-resolution mass spectrometry workflow for accurate absolute lipid quantification with 13 C internal standards
Source: Royal Society of Chemistry journal article supplement (doi:10.1039/d0an02443k), 2021-01-01
Supplement: d0an02443k3.xlsx [file d0an02443k3.xlsx]

## Sheet: Result_table
Analyte	AnalyteType	RT_mean_Analyte	QuantType	Polarity	ESTD	ESTDLevel	RT_mean_ESTD	ISTD	ISTDLevel	RT_mean_ISTD	Blank_Extr_LILY_rpMS1_posneg_1_Splash	Blank_Extr_LILY_rpMS1_posneg_2_Splash	Blank_Extr_LILY_rpMS1_posneg_3_Splash	Blank_ISTD_LILY_rpMS1_posneg_1	Blank_ISTD_LILY_rpMS1_posneg_2	Blank_ISTD_LILY_rpMS1_posneg_3	Blank_Solvent_no_rpMS1_posneg_1	Blank_Solvent_no_rpMS1_posneg_11	Blank_Solvent_no_rpMS1_posneg_12	Blank_Solvent_no_rpMS1_posneg_14_switch	Blank_Solvent_no_rpMS1_posneg_15	Blank_Solvent_no_rpMS1_posneg_16	Blank_Solvent_no_rpMS1_posneg_18	Blank_Solvent_no_rpMS1_posneg_19_switch	Blank_Solvent_no_rpMS1_posneg_2	Blank_Solvent_no_rpMS1_posneg_20	Blank_Solvent_no_rpMS1_posneg_21	Blank_Solvent_no_rpMS1_posneg_22	Blank_Solvent_no_rpMS1_posneg_23	Blank_Solvent_no_rpMS1_posneg_24	Blank_Solvent_no_rpMS1_posneg_25	Blank_Solvent_no_rpMS1_posneg_26	Blank_Solvent_no_rpMS1_posneg_27	Blank_Solvent_no_rpMS1_posneg_28	Blank_Solvent_no_rpMS1_posneg_3	Blank_Solvent_no_rpMS1_posneg_4	Blank_Solvent_no_rpMS1_posneg_5_switch	Blank_Solvent_no_rpMS1_posneg_6	Blank_Solvent_no_rpMS1_posneg_7	Blank_Solvent_no_rpMS1_posneg_9_switch	ESTD_1_LILY_rpMS1_posneg_1	ESTD_1_LILY_rpMS1_posneg_2	ESTD_1_LILY_rpMS1_posneg_3	ESTD_1_LILY_rpMS1_posneg_4	ESTD_1_LILY_rpMS1_posneg_5	ESTD_1_LILY_rpMS1_posneg_6	ESTD_10_LILY_rpMS1_posneg_1	ESTD_10_LILY_rpMS1_posneg_2	ESTD_10_LILY_rpMS1_posneg_3
Units		[min]					[min]			[min]	[nmol/L]	[nmol/L]	[nmol/L]	[nmol/L]	[nmol/L]	[nmol/L]	[nmol/L]	[nmol/L]	[nmol/L]	[nmol/L]	[nmol/L]	[nmol/L]	[nmol/L]	[nmol/L]	[nmol/L]	[nmol/L]	[nmol/L]	[nmol/L]	[nmol/L]	[nmol/L]	[nmol/L]	[nmol/L]	[nmol/L]	[nmol/L]	[nmol/L]	[nmol/L]	[nmol/L]	[nmol/L]	[nmol/L]	[nmol/L]	[nmol/L]	[nmol/L]	[nmol/L]	[nmol/L]	[nmol/L]	[nmol/L]	[nmol/L]	[nmol/L]	[nmol/L]
AcCa 10:0	Analyte	1.6	RPonlyESTD	pos	AcCa 6:0	Level2	1.4	no	no	1.4	NA	NA	NA	NA	NA	NA	NA	NA	NA	NA	NA	NA	NA	NA	NA	NA	NA	NA	NA	NA	NA	NA	NA	NA	NA	NA	NA	NA	NA	NA	NA	NA	NA	NA	NA	NA	NA	NA	NA
AcCa 10:1	Analyte	1.5	RPonlyESTD	pos	AcCa 6:0	Level2	1.4	no	no	1.4	NA	NA	75.2527	NA	NA	NA	NA	NA	NA	NA	NA	NA	NA	NA	NA	NA	NA	NA	NA	NA	NA	NA	NA	NA	NA	NA	NA	NA	NA	NA	NA	NA	NA	NA	NA	NA	NA	NA	NA
AcCa 16:0	Analyte	2.5	RPonlyESTD	pos	AcCa 18:1	Level2	2.6	no	no	2.6	NA	NA	NA	NA	NA	NA	NA	NA	NA	NA	NA	NA	NA	NA	NA	NA	NA	NA	NA	NA	NA	NA	NA	NA	NA	NA	NA	NA	NA	NA	NA	NA	NA	NA	NA	NA	NA	NA	NA
AcCa 16:1	Analyte	2.2	RPonlyESTD	pos	AcCa 18:1	Level2	2.6	no	no	2.6	NA	NA	NA	NA	NA	NA	NA	NA	NA	NA	NA	NA	NA	NA	NA	NA	NA	NA	NA	NA	NA	NA	NA	NA	NA	NA	NA	NA	NA	NA	NA	NA	NA	NA	NA	NA	NA	NA	NA
AcCa 18:1	ESTD	2.6	RPonlyESTD	pos	AcCa 18:1	Level1	2.6	no	no	2.6	NA	NA	NA	NA	NA	NA	NA	NA	28.6361	36.2774	NA	NA	35.5616	35.9914	NA	32.3987	31.4245	34.9116	30.7163	29.6025	28.6279	28.2615	27.7819	27.3915	NA	NA	122.261	34.689	31.6283	40.2674	NA	NA	NA	NA	NA	NA	NA	NA	NA
AcCa 18:2	Analyte	2.3	RPonlyESTD	pos	AcCa 18:1	Level2	2.6	no	no	2.6	NA	NA	NA	NA	NA	NA	NA	NA	NA	NA	NA	NA	NA	NA	NA	NA	NA	NA	NA	NA	NA	NA	NA	NA	NA	NA	NA	NA	NA	NA	NA	NA	NA	NA	NA	NA	NA	NA	NA
AcCa 20:3	Analyte	5.3	RPonlyESTD	pos	AcCa 18:1	Level3	2.6	no	no	2.6	NA	28.8705	NA	39.6737	38.2679	38.068	NA	NA	NA	NA	NA	NA	NA	NA	NA	NA	NA	NA	NA	NA	NA	NA	NA	NA	NA	NA	NA	NA	NA	NA	42.4704	40.5744	40.4314	41.5543	43.8408	39.3039	41.3999	41.904	39.9258
AcCa 20:4	Analyte	2.5	RPonlyESTD	pos	AcCa 18:1	Level2	2.6	no	no	2.6	NA	NA	NA	NA	NA	NA	NA	NA	NA	NA	NA	NA	NA	NA	NA	NA	NA	NA	NA	NA	NA	NA	NA	NA	NA	NA	NA	NA	NA	NA	NA	NA	NA	NA	NA	NA	NA	NA	NA
AcCa 6:0	ESTD	1.4	RPonlyESTD	pos	AcCa 6:0	Level1	1.4	no	no	1.4	NA	76.0875	75.3775	NA	NA	NA	NA	NA	NA	NA	NA	NA	NA	NA	NA	NA	NA	NA	NA	NA	NA	NA	NA	NA	NA	NA	102.158	75.6543	NA	NA	NA	NA	NA	NA	NA	NA	NA	NA	NA
CE 14:0	Analyte	17.9	RPMultipoint	pos	CE 16:0	Level2	18.2	EE 18:0	Level2	18	NA	NA	NA	NA	NA	NA	NA	NA	NA	NA	NA	NA	NA	NA	NA	NA	NA	NA	NA	NA	NA	NA	NA	NA	NA	NA	NA	NA	NA	NA	NA	NA	NA	NA	NA	NA	NA	NA	NA
CE 15:0	Analyte	18.1	RPMultipoint	pos	CE 16:0	Level2	18.2	EE 18:0	Level2	18	NA	NA	NA	NA	NA	NA	NA	NA	NA	NA	NA	NA	NA	NA	NA	NA	NA	NA	NA	NA	NA	NA	NA	NA	NA	NA	NA	NA	NA	NA	NA	NA	NA	NA	NA	NA	NA	NA	NA
CE 16:0	ESTD	18.2	RPMultipoint	pos	CE 16:0	Level1	18.2	EE 18:0	Level2	18	NA	NA	NA	NA	NA	NA	NA	NA	NA	NA	NA	NA	NA	NA	NA	NA	NA	NA	NA	NA	NA	NA	NA	NA	NA	NA	NA	NA	NA	NA	NA	NA	NA	NA	NA	NA	NA	NA	NA
CE 16:1	Analyte	17.8	RPMultipoint	pos	CE 18:2	Level2	17.9	EE 18:1	Level2	17.9	NA	NA	NA	NA	NA	NA	NA	NA	NA	NA	NA	NA	NA	NA	NA	NA	NA	NA	NA	NA	NA	NA	NA	NA	NA	NA	NA	NA	NA	NA	NA	NA	NA	NA	NA	NA	NA	NA	NA
CE 17:0	Analyte	18.4	RPMultipoint	pos	CE 16:0	Level2	18.2	EE 18:0	Level2	18	NA	NA	NA	NA	NA	NA	NA	NA	NA	NA	NA	NA	NA	NA	NA	NA	NA	NA	NA	NA	NA	NA	NA	NA	NA	NA	NA	NA	NA	NA	NA	NA	NA	NA	NA	NA	NA	NA	NA
CE 17:1	Analyte	18	RPMultipoint	pos	CE 18:2	Level2	17.9	EE 18:1	Level2	17.9	NA	NA	NA	NA	NA	NA	NA	NA	NA	NA	NA	NA	NA	NA	NA	NA	NA	NA	NA	NA	NA	NA	NA	NA	NA	NA	NA	NA	NA	NA	NA	NA	NA	NA	NA	NA	NA	NA	NA
CE 18:0	ESTD	18.6	RPMultipoint	pos	CE 16:0	Level2	18.2	EE 18:0	Level3	18	NA	NA	NA	NA	NA	NA	NA	NA	NA	NA	NA	NA	NA	NA	NA	NA	NA	NA	NA	NA	NA	NA	NA	NA	NA	NA	NA	NA	NA	NA	NA	NA	NA	NA	NA	NA	NA	NA	NA
CE 18:1	DeutISTD	18.1	RPMultipoint	pos	CE 18:2	Level2	17.9	EE 18:1	Level2	17.9	1110.9	1625.28	3565.36	NA	NA	NA	NA	NA	NA	NA	NA	NA	NA	NA	NA	NA	NA	NA	NA	NA	NA	NA	NA	NA	NA	NA	NA	NA	NA	NA	NA	NA	NA	NA	NA	NA	NA	NA	NA
CE 18:1	Analyte	18.1	RPMultipoint	pos	CE 18:2	Level2	17.9	EE 18:1	Level2	17.9	NA	NA	NA	NA	NA	NA	NA	NA	NA	NA	NA	NA	NA	NA	NA	NA	NA	NA	NA	NA	NA	NA	NA	NA	NA	NA	NA	NA	NA	NA	NA	NA	NA	NA	NA	NA	NA	NA	NA
CE 18:2	ESTD	17.9	RPMultipoint	pos	CE 18:2	Level1	17.9	EE 18:2	Level2	17.6	NA	NA	NA	NA	NA	NA	NA	NA	NA	NA	NA	NA	NA	NA	NA	NA	NA	NA	NA	NA	NA	NA	NA	NA	NA	NA	NA	NA	NA	NA	NA	NA	NA	NA	NA	NA	NA	NA	NA
CE 18:3	Analyte	17.6	RPMultipoint	pos	CE 18:2	Level2	17.9	EE 18:3	Level2	17.4	NA	NA	NA	NA	NA	NA	NA	NA	NA	NA	NA	NA	NA	NA	NA	NA	NA	NA	NA	NA	NA	NA	NA	NA	NA	NA	NA	NA	NA	NA	NA	NA	NA	NA	NA	NA	NA	NA	NA
CE 20:3	Analyte	17.9	RPMultipoint	pos	CE 18:2	Level2	17.9	EE 18:3	Level2	17.4	NA	NA	NA	NA	NA	NA	NA	NA	NA	NA	NA	NA	NA	NA	NA	NA	NA	NA	NA	NA	NA	NA	NA	NA	NA	NA	NA	NA	NA	NA	NA	NA	NA	NA	NA	NA	NA	NA	NA
CE 20:4	Analyte	17.7	RPMultipoint	pos	CE 18:2	Level2	17.9	EE 18:3	Level2	17.4	NA	NA	NA	NA	NA	NA	NA	NA	NA	NA	NA	NA	NA	NA	NA	NA	NA	NA	NA	NA	NA	NA	NA	NA	NA	NA	NA	NA	NA	NA	NA	NA	NA	NA	NA	NA	NA	NA	NA
CE 20:5	Analyte	17.4	RPMultipoint	pos	CE 18:2	Level2	17.9	EE 18:3	Level2	17.4	NA	NA	NA	NA	NA	NA	NA	NA	NA	NA	NA	NA	NA	NA	NA	NA	NA	NA	NA	NA	NA	NA	NA	NA	NA	NA	NA	NA	NA	NA	NA	NA	NA	NA	NA	NA	NA	NA	NA
CE 22:4	Analyte	17.9	RPMultipoint	pos	CE 18:2	Level2	17.9	EE 18:2	Level2	17.6	NA	NA	NA	NA	NA	NA	NA	NA	NA	NA	NA	NA	NA	NA	NA	NA	NA	NA	NA	NA	NA	NA	NA	NA	NA	NA	NA	NA	NA	NA	NA	NA	NA	NA	NA	NA	NA	NA	NA
CE 22:5	Analyte	17.7	RPMultipoint	pos	CE 18:2	Level2	17.9	EE 18:3	Level2	17.4	NA	NA	NA	NA	NA	NA	NA	NA	NA	NA	NA	NA	NA	NA	NA	NA	NA	NA	NA	NA	NA	NA	NA	NA	NA	NA	NA	NA	NA	NA	NA	NA	NA	NA	NA	NA	NA	NA	NA
CE 22:6	Analyte	17.5	RPMultipoint	pos	CE 18:2	Level2	17.9	EE 18:3	Level2	17.4	NA	NA	NA	NA	NA	NA	NA	NA	NA	NA	NA	NA	NA	NA	NA	NA	NA	NA	NA	NA	NA	NA	NA	NA	NA	NA	NA	NA	NA	NA	NA	NA	NA	NA	NA	NA	NA	NA	NA
CL 64:4	ESTD	15.8	RPMultipoint	neg	CL 64:4	Level1	15.8	CL 70:6	Level2	16.2	NA	NA	NA	NA	NA	NA	NA	NA	NA	NA	NA	NA	NA	NA	NA	NA	NA	NA	NA	NA	NA	NA	NA	NA	NA	NA	NA	NA	NA	NA	NA	NA	NA	NA	NA	NA	NA	NA	NA
CL 72:4	ESTD	16.8	RPMultipoint	neg	CL 72:4	Level1	16.8	CL 72:5	Level2	16.6	NA	NA	NA	NA	NA	NA	NA	NA	NA	NA	NA	NA	NA	NA	NA	NA	NA	NA	NA	NA	NA	NA	NA	NA	NA	NA	NA	NA	NA	NA	NA	NA	NA	NA	NA	NA	NA	NA	NA
Cer 34:1;2	ESTD	12.6	RPMultipoint	neg	Cer 34:1;2	Level1	12.6	Cer 34:1;2	Level1	12.5	NA	NA	NA	NA	NA	NA	NA	NA	NA	NA	NA	NA	NA	NA	NA	NA	NA	NA	NA	NA	NA	NA	NA	NA	NA	NA	NA	NA	NA	NA	NA	NA	NA	NA	NA	NA	NA	NA	NA
Cer 34:1;3	Analyte	11.9	RPMultipoint	neg	Cer 34:1;2	Level3	12.6	Cer 34:1;3	Level1	11.9	NA	NA	NA	NA	NA	NA	NA	NA	NA	NA	NA	NA	NA	NA	NA	NA	NA	NA	NA	NA	NA	NA	NA	NA	NA	NA	NA	NA	NA	NA	NA	NA	NA	NA	NA	NA	NA	NA	NA
Cer 36:1;2	ESTD	13.7	RPMultipoint	neg	Cer 36:1;2	Level1	13.7	Cer 36:1;2	Level1	13.7	NA	NA	NA	NA	NA	NA	NA	NA	NA	NA	NA	NA	NA	NA	NA	NA	NA	NA	NA	NA	NA	NA	NA	NA	NA	NA	NA	NA	NA	NA	NA	NA	NA	NA	NA	NA	NA	NA	NA
Cer 38:1;2	Analyte	14.7	RPMultipoint	neg	Cer 36:1;2	Level3	13.7	Cer 36:1;2	Level3	13.7	NA	NA	NA	NA	NA	NA	NA	NA	NA	NA	NA	NA	NA	NA	NA	NA	NA	NA	NA	NA	NA	NA	NA	NA	NA	NA	NA	NA	NA	NA	NA	NA	NA	NA	NA	NA	NA	NA	NA
Cer 40:1;2	Analyte	15.4	RPMultipoint	neg	Cer 36:1;2	Level3	13.7	Cer 36:1;2	Level3	13.7	NA	NA	NA	NA	NA	NA	NA	NA	NA	NA	NA	NA	NA	NA	NA	NA	NA	NA	NA	NA	NA	NA	NA	NA	NA	NA	NA	NA	NA	NA	NA	NA	NA	NA	NA	NA	NA	NA	NA
Cer 40:2;2	Analyte	14.8	RPMultipoint	neg	Cer 36:1;2	Level3	13.7	Cer 36:1;2	Level3	13.7	NA	NA	NA	NA	NA	NA	NA	NA	NA	NA	NA	NA	NA	NA	NA	NA	NA	NA	NA	NA	NA	NA	NA	NA	NA	NA	NA	NA	NA	NA	NA	NA	NA	NA	NA	NA	NA	NA	NA
Cer 41:1;2	Analyte	15.7	RPMultipoint	neg	Cer 36:1;2	Level3	13.7	Cer 36:1;2	Level3	13.7	NA	NA	NA	NA	NA	NA	NA	NA	NA	NA	NA	NA	NA	NA	NA	NA	NA	NA	NA	NA	NA	NA	NA	NA	NA	NA	NA	NA	NA	NA	NA	NA	NA	NA	NA	NA	NA	NA	NA
Cer 42:0;2	ESTD	16.1	RPMultipoint	neg	Cer 36:1;2	Level3	13.7	Cer 36:1;2	Level3	13.7	NA	NA	NA	NA	NA	NA	NA	NA	NA	NA	NA	NA	NA	NA	NA	NA	NA	NA	NA	NA	NA	NA	NA	NA	NA	NA	NA	NA	NA	NA	NA	NA	NA	NA	NA	NA	NA	NA	NA
Cer 42:1;2	ESTD	16	RPMultipoint	neg	Cer 36:1;2	Level3	13.7	Cer 36:1;2	Level3	13.7	NA	NA	NA	NA	NA	NA	NA	NA	NA	NA	NA	NA	NA	NA	NA	NA	NA	NA	NA	NA	NA	NA	NA	NA	NA	NA	NA	NA	NA	NA	NA	NA	NA	NA	NA	NA	NA	NA	NA
Cer 42:2;2	ESTD	15.4	RPMultipoint	neg	Cer 36:1;2	Level3	13.7	Cer 36:1;2	Level3	13.7	NA	NA	NA	NA	NA	NA	NA	NA	NA	NA	NA	NA	NA	NA	NA	NA	NA	NA	NA	NA	NA	NA	NA	NA	NA	NA	NA	NA	NA	NA	NA	NA	NA	NA	NA	NA	NA	NA	NA
Cer 42:3;2	Analyte	14.7	RPMultipoint	neg	Cer 36:1;2	Level3	13.7	Cer 36:1;2	Level3	13.7	NA	NA	NA	NA	NA	NA	NA	NA	NA	NA	NA	NA	NA	NA	NA	NA	NA	NA	NA	NA	NA	NA	NA	NA	NA	NA	NA	NA	NA	NA	NA	NA	NA	NA	NA	NA	NA	NA	NA
Cholesterol	DeutISTD	11.4	RPFIAOnepoint	pos	Cholesterol	Level1	11.5	Ergosterol	Level3	10.1	78.4935	87.3318	75.9348	NA	NA	NA	NA	NA	NA	NA	NA	NA	NA	NA	NA	NA	NA	NA	NA	NA	NA	NA	NA	NA	NA	NA	NA	NA	NA	NA	NA	NA	NA	NA	NA	NA	NA	NA	NA
Cholesterol	ESTD	11.5	RPFIAOnepoint	pos	Cholesterol	Level1	11.5	Ergosterol	Level3	10.1	NA	NA	NA	NA	NA	NA	NA	NA	NA	NA	NA	NA	NA	NA	NA	NA	NA	NA	NA	NA	NA	NA	NA	NA	NA	NA	NA	NA	NA	NA	NA	NA	NA	NA	NA	NA	NA	NA	NA
Co Q10	ESTD	16.8	RPMultipoint	pos	Co Q10	Level1	16.8	Co Q9	Level2	16.3	NA	NA	NA	NA	NA	NA	NA	NA	NA	NA	NA	NA	NA	NA	NA	NA	NA	NA	NA	NA	NA	NA	NA	NA	NA	NA	NA	NA	NA	NA	NA	NA	NA	NA	NA	NA	NA	NA	NA
Co Q9	Analyte	16.3	RPMultipoint	pos	Co Q10	Level2	16.8	Co Q9	Level1	16.3	NA	NA	NA	NA	NA	NA	NA	NA	NA	NA	NA	NA	NA	NA	NA	NA	NA	NA	NA	NA	NA	NA	NA	NA	NA	NA	NA	NA	NA	NA	NA	NA	NA	NA	NA	NA	NA	NA	NA
DG 30:0	Analyte	13.4	RPMultipoint	pos	DG 34:1	Level3	14.4	DG 32:1	Level2	13.5	17.7234	NA	NA	NA	NA	NA	NA	NA	NA	NA	NA	NA	NA	NA	NA	NA	NA	NA	NA	NA	NA	NA	NA	NA	NA	NA	NA	NA	NA	NA	NA	NA	NA	NA	NA	NA	NA	NA	NA
DG 32:0	ESTD	14.4	RPMultipoint	pos	DG 34:1	Level2	14.4	DG 33:1	Level2	14	NA	NA	21.0605	NA	28.7109	25.0941	NA	NA	NA	NA	NA	NA	NA	NA	NA	NA	NA	NA	NA	NA	NA	NA	NA	NA	NA	NA	NA	NA	NA	NA	NA	NA	NA	NA	NA	NA	NA	NA	NA
DG 32:1	Analyte	13.5	RPFIAOnepoint	pos	DG 36:2	Level2	14.5	DG 34:2	Level2	13.7	NA	NA	NA	NA	NA	NA	3947.65	NA	NA	NA	NA	NA	NA	NA	NA	NA	NA	NA	NA	NA	NA	NA	NA	NA	NA	NA	NA	NA	NA	NA	NA	NA	NA	NA	NA	NA	NA	NA	NA
DG 32:2	Analyte	12.5	RPFIAOnepoint	pos	DG 36:2	Level2	14.5	DG 34:3	Level2	12.6	NA	NA	NA	NA	NA	NA	1526.39	NA	199.914	106.449	NA	NA	NA	NA	NA	NA	NA	NA	NA	NA	NA	NA	NA	NA	NA	NA	80.8698	20.45	115.555	139.321	NA	NA	NA	NA	NA	NA	NA	NA	NA
DG 33:1	Analyte	14	RPMultipoint	pos	DG 34:1	Level2	14.4	DG 33:1	Level1	14	NA	NA	NA	NA	NA	NA	NA	NA	NA	NA	NA	NA	NA	NA	NA	NA	NA	NA	NA	NA	NA	NA	NA	NA	NA	NA	NA	NA	NA	NA	17.5234	NA	17.5716	17.5381	NA	NA	NA	17.5256	17.5576
DG 33:1	DeutISTD	13.9	RPFIAOnepoint	pos	DG 36:2	Level2	14.5	DG 34:2	Level2	13.7	147.179	128.18	121.879	NA	NA	NA	NA	NA	NA	NA	NA	NA	NA	NA	NA	NA	NA	NA	NA	NA	NA	NA	NA	NA	NA	NA	NA	NA	NA	NA	NA	NA	NA	NA	NA	NA	NA	NA	NA
DG 34:0	Analyte	15.2	RPFIAOnepoint	pos	DG 34:1	Level2	14.4	DG 36:1	Level2	15.2	NA	NA	NA	NA	NA	NA	8047.19	NA	8452.99	13407.3	NA	8967	NA	NA	NA	NA	NA	NA	NA	NA	NA	NA	NA	NA	NA	NA	35339.2	4626.82	3406.37	20756	NA	NA	NA	NA	NA	NA	NA	NA	NA
DG 34:1	ESTD	14.4	RPMultipoint	pos	DG 34:1	Level1	14.4	DG 34:1	Level1	14.4	NA	NA	NA	NA	NA	NA	NA	NA	NA	NA	NA	NA	NA	NA	NA	NA	NA	NA	NA	NA	NA	NA	NA	NA	NA	NA	NA	NA	NA	NA	NA	NA	NA	NA	NA	NA	NA	NA	NA
DG 34:2	Analyte	13.7	RPMultipoint	pos	DG 40:6	Level2	14.1	DG 34:2	Level1	13.7	NA	3.60883	NA	NA	NA	NA	NA	NA	NA	NA	NA	NA	NA	NA	NA	NA	NA	NA	NA	NA	NA	NA	NA	NA	NA	NA	NA	NA	NA	NA	NA	NA	NA	NA	NA	NA	NA	NA	NA
DG 34:3	Analyte	12.6	RPFIAOnepoint	pos	DG 36:2	Level2	14.5	DG 34:3	Level1	12.6	NA	NA	NA	NA	NA	NA	8518.24	NA	89.2413	107.21	NA	NA	NA	NA	NA	NA	NA	NA	NA	NA	NA	NA	NA	NA	NA	NA	NA	NA	52.265	NA	NA	NA	NA	NA	NA	NA	NA	NA	NA
DG 34:4	Analyte	11.6	RPMultipoint	pos	DG 38:4	Level3	14.4	DG 34:4	Level1	11.6	NA	NA	NA	NA	NA	NA	NA	NA	NA	NA	NA	NA	NA	NA	NA	NA	NA	NA	NA	NA	NA	NA	NA	NA	NA	NA	NA	NA	NA	NA	NA	NA	NA	NA	NA	NA	NA	NA	NA
DG 35:1	Analyte	14.8	RPMultipoint	pos	DG 34:1	Level2	14.4	DG 35:1	Level1	14.9	NA	NA	NA	NA	NA	NA	NA	NA	NA	NA	NA	NA	NA	NA	NA	NA	NA	NA	NA	NA	NA	NA	NA	NA	NA	NA	NA	NA	NA	NA	NA	NA	NA	NA	NA	NA	NA	NA	NA
DG 35:2	Analyte	14	RPMultipoint	pos	DG 36:2	Level2	14.5	DG 35:2	Level1	14.1	NA	NA	NA	NA	NA	NA	NA	NA	NA	NA	NA	NA	NA	NA	NA	NA	NA	NA	NA	NA	NA	NA	NA	NA	NA	NA	NA	NA	NA	NA	NA	NA	NA	NA	NA	NA	NA	NA	NA
DG 35:3	Analyte	13.3	RPMultipoint	pos	DG 36:2	Level3	14.5	DG 35:3	Level1	13.2	NA	NA	NA	NA	NA	NA	NA	NA	NA	NA	NA	NA	NA	NA	NA	NA	NA	NA	NA	NA	NA	NA	NA	NA	NA	NA	NA	NA	NA	NA	NA	NA	NA	NA	NA	NA	NA	NA	NA
DG 36:0	Analyte	15.8	RPMultipoint	pos	DG 34:1	Level3	14.4	DG 36:1	Level3	15.2	NA	NA	NA	33.127	37.9222	31.4911	NA	NA	NA	NA	NA	NA	NA	NA	NA	NA	NA	NA	NA	NA	NA	NA	NA	NA	NA	NA	NA	NA	NA	NA	28.9945	30.1169	31.756	30.4819	33.8832	31.7747	33.7313	40.7273	28.98
DG 36:1	Analyte	15.2	RPFIAOnepoint	pos	DG 34:1	Level2	14.4	DG 36:1	Level1	15.2	NA	NA	NA	NA	NA	NA	9017.51	NA	NA	NA	NA	NA	NA	NA	NA	NA	NA	NA	NA	NA	NA	NA	NA	NA	NA	NA	NA	NA	NA	NA	NA	NA	NA	NA	NA	NA	NA	NA	NA
DG 36:2	ESTD	14.5	RPMultipoint	pos	DG 36:2	Level1	14.5	DG 36:2	Level1	14.5	NA	NA	NA	NA	NA	NA	NA	NA	NA	NA	NA	NA	NA	NA	NA	NA	NA	NA	NA	NA	NA	NA	NA	NA	NA	NA	NA	NA	NA	NA	NA	NA	NA	NA	NA	NA	NA	NA	NA
DG 36:3	Analyte	13.7	RPMultipoint	pos	DG 40:6	Level2	14.1	DG 36:3	Level1	13.7	NA	NA	NA	NA	NA	NA	NA	NA	NA	NA	NA	NA	NA	NA	NA	NA	NA	NA	NA	NA	NA	NA	NA	NA	NA	NA	NA	NA	NA	NA	NA	NA	NA	NA	NA	NA	NA	NA	NA
DG 36:4	Analyte	12.8	RPFIAOnepoint	pos	DG 38:4	Level2	14.4	DG 36:4	Level1	12.8	NA	NA	NA	NA	NA	NA	16981.8	NA	NA	NA	NA	NA	NA	NA	NA	NA	NA	NA	NA	NA	NA	NA	NA	NA	NA	NA	NA	NA	NA	NA	NA	NA	NA	NA	NA	NA	NA	NA	NA
DG 36:5	Analyte	11.9	RPMultipoint	pos	DG 38:4	Level3	14.4	DG 36:5	Level1	11.9	1.66191	NA	NA	NA	NA	NA	NA	NA	NA	NA	NA	NA	NA	NA	NA	NA	NA	NA	NA	NA	NA	NA	NA	NA	NA	NA	NA	NA	NA	NA	NA	NA	NA	NA	NA	NA	NA	NA	NA
DG 38:2	Analyte	15.2	RPMultipoint	pos	DG 34:1	Level3	14.4	DG 36:1	Level2	15.2	NA	NA	NA	NA	NA	NA	NA	NA	NA	NA	NA	NA	NA	NA	NA	NA	NA	NA	NA	NA	NA	NA	NA	NA	NA	NA	NA	NA	NA	NA	NA	NA	NA	NA	NA	NA	NA	NA	NA
DG 38:3	Analyte	14.6	RPMultipoint	pos	DG 36:2	Level2	14.5	DG 36:2	Level2	14.5	NA	NA	NA	NA	NA	NA	NA	NA	NA	NA	NA	NA	NA	NA	NA	NA	NA	NA	NA	NA	NA	NA	NA	NA	NA	NA	NA	NA	NA	NA	NA	NA	NA	NA	NA	NA	NA	NA	NA
DG 38:4	ESTD	14.4	RPMultipoint	pos	DG 36:2	Level2	14.5	DG 36:2	Level2	14.5	NA	NA	NA	NA	NA	NA	NA	NA	NA	NA	NA	NA	NA	NA	NA	NA	NA	NA	NA	NA	NA	NA	NA	NA	NA	NA	NA	NA	NA	NA	NA	NA	NA	NA	NA	NA	NA	NA	NA
DG 38:5	Analyte	13.5	RPFIAOnepoint	pos	DG 36:2	Level2	14.5	DG 36:3	Level2	13.7	NA	NA	NA	NA	NA	NA	NA	NA	NA	NA	NA	NA	NA	NA	NA	NA	NA	NA	NA	NA	NA	NA	NA	NA	NA	NA	NA	NA	NA	NA	NA	NA	NA	NA	NA	NA	NA	NA	NA
DG 38:6	Analyte	12.5	RPFIAOnepoint	pos	DG 38:4	Level2	14.4	DG 36:4	Level2	12.8	NA	NA	NA	NA	NA	NA	69.3816	NA	NA	NA	NA	NA	NA	NA	NA	NA	NA	NA	NA	NA	NA	NA	NA	NA	NA	NA	NA	NA	NA	NA	NA	NA	NA	NA	NA	NA	NA	NA	NA
DG 40:6	ESTD	14.1	RPMultipoint	pos	DG 40:6	Level1	14.1	DG 36:3	Level2	13.7	NA	NA	NA	NA	NA	NA	NA	NA	NA	NA	NA	NA	NA	NA	NA	NA	NA	NA	NA	NA	NA	NA	NA	NA	NA	NA	NA	NA	NA	NA	NA	NA	NA	NA	NA	NA	NA	NA	NA
EE 18:0	Analyte	18	RPMultipoint	pos	CE 16:0	Level2	18.2	EE 18:0	Level1	18	NA	NA	NA	NA	NA	NA	NA	NA	NA	NA	NA	NA	NA	NA	NA	NA	NA	NA	NA	NA	NA	NA	NA	NA	NA	NA	NA	NA	NA	NA	NA	NA	NA	NA	NA	NA	NA	NA	NA
Ergosterol	ESTD	10.1	RPFIAOnepoint	pos	Cholesterol	Level2	11.5	Ergosterol	Level1	10.1	NA	NA	NA	NA	NA	NA	NA	NA	NA	NA	NA	NA	NA	NA	NA	NA	NA	NA	NA	NA	NA	NA	NA	NA	NA	NA	NA	NA	NA	NA	NA	NA	NA	NA	NA	NA	NA	NA	NA
FA 14:0	Analyte	3.9	RPFIAOnepoint	neg	FA 20:1	Level2	11.5	FA 18:2	Level2	4.2	NA	NA	NA	NA	NA	NA	NA	NA	NA	NA	NA	NA	NA	NA	NA	NA	NA	NA	NA	NA	NA	NA	NA	NA	NA	NA	448.412	NA	NA	NA	NA	NA	NA	NA	NA	NA	NA	NA	NA
FA 16:0	ESTD	5.2	RPFIAOnepoint	neg	FA 20:1	Level2	11.5	FA 18:1	Level2	5.3	NA	NA	203.134	NA	NA	NA	NA	NA	NA	NA	NA	NA	NA	NA	NA	NA	NA	NA	NA	NA	NA	NA	NA	NA	NA	NA	NA	NA	NA	NA	NA	NA	NA	NA	NA	NA	NA	NA	NA
FA 16:1	Analyte	4	RPFIAOnepoint	neg	FA 20:1	Level2	11.5	FA 18:2	Level2	4.2	NA	NA	NA	NA	NA	NA	6047.66	NA	NA	NA	NA	NA	NA	NA	NA	NA	NA	NA	NA	NA	NA	NA	NA	NA	NA	NA	NA	NA	NA	NA	NA	NA	NA	NA	NA	NA	NA	NA	NA
FA 18:0	ESTD	7	RPFIAOnepoint	neg	FA 20:1	Level2	11.5	FA 18:1	Level3	5.3	NA	767.265	NA	NA	NA	NA	NA	NA	NA	NA	NA	NA	NA	NA	NA	NA	NA	NA	NA	NA	NA	NA	NA	NA	NA	NA	NA	NA	NA	NA	NA	NA	NA	NA	NA	NA	NA	NA	NA
FA 18:1	Analyte	5.3	RPFIAOnepoint	neg	FA 20:1	Level2	11.5	FA 18:1	Level1	5.3	NA	NA	778.888	NA	NA	NA	NA	NA	NA	NA	NA	NA	NA	NA	NA	NA	NA	NA	NA	NA	NA	NA	NA	NA	NA	NA	NA	NA	NA	NA	NA	NA	NA	NA	NA	NA	NA	NA	NA
FA 18:2	Analyte	4.2	RPFIAOnepoint	neg	FA 20:1	Level2	11.5	FA 18:2	Level1	4.2	249.168	NA	NA	NA	NA	NA	117495	NA	NA	NA	NA	NA	NA	NA	NA	NA	NA	NA	NA	NA	NA	NA	NA	NA	NA	NA	NA	NA	NA	NA	NA	NA	NA	NA	NA	NA	NA	NA	NA
FA 18:3	Analyte	3.5	RPFIAOnepoint	neg	FA 20:1	Level2	11.5	FA 18:3	Level1	3.5	NA	NA	NA	NA	NA	NA	NA	NA	NA	NA	NA	NA	NA	NA	NA	NA	NA	NA	NA	NA	NA	NA	NA	NA	NA	NA	NA	NA	NA	NA	NA	NA	NA	NA	NA	NA	NA	NA	84.0955
FA 20:1	ESTD	11.5	RPFIAOnepoint	neg	FA 20:1	Level1	11.5	FA 18:1	Level3	5.3	NA	NA	NA	NA	NA	NA	NA	NA	NA	3058.96	NA	NA	NA	1050.93	NA	NA	NA	NA	NA	NA	NA	NA	NA	NA	NA	NA	2450.4	9762.76	NA	2920.45	NA	NA	NA	NA	NA	NA	NA	NA	NA
FA 20:4	Analyte	4	RPFIAOnepoint	neg	FA 20:1	Level2	11.5	FA 18:3	Level2	3.5	NA	105.85	NA	NA	NA	NA	NA	NA	NA	3523.11	NA	NA	NA	9948.39	NA	NA	NA	NA	NA	NA	NA	NA	NA	NA	NA	NA	396.007	5316.02	NA	4259.81	NA	NA	NA	NA	NA	NA	NA	NA	NA
FA 20:5	Analyte	3.3	RPFIAOnepoint	neg	FA 20:1	Level2	11.5	FA 18:3	Level2	3.5	NA	NA	NA	NA	NA	NA	NA	NA	NA	NA	NA	NA	NA	NA	NA	NA	NA	NA	NA	NA	NA	NA	NA	NA	NA	NA	NA	NA	NA	NA	NA	NA	NA	NA	NA	NA	NA	NA	NA
FA 22:0	ESTD	11.5	RPFIAOnepoint	neg	FA 20:1	Level2	11.5	FA 18:1	Level3	5.3	198.673	NA	NA	NA	NA	NA	NA	NA	NA	NA	NA	NA	NA	NA	NA	NA	NA	NA	NA	NA	NA	NA	NA	NA	NA	NA	586.59	NA	NA	NA	NA	NA	NA	NA	NA	NA	NA	NA	NA
FA 22:5	Analyte	4.4	RPFIAOnepoint	neg	FA 20:1	Level2	11.5	FA 18:2	Level2	4.2	NA	NA	NA	NA	NA	NA	NA	NA	NA	NA	NA	NA	NA	NA	NA	NA	NA	NA	NA	NA	NA	NA	NA	NA	NA	NA	NA	NA	NA	NA	NA	NA	NA	NA	NA	NA	NA	NA	NA
FA 22:6	Analyte	3.7	RPFIAOnepoint	neg	FA 20:1	Level2	11.5	FA 18:3	Level2	3.5	94.4737	NA	NA	NA	NA	NA	NA	NA	NA	3050.47	NA	NA	NA	3065.6	NA	NA	NA	NA	NA	NA	NA	NA	NA	NA	NA	NA	1367.09	8058.53	NA	12622.6	NA	NA	NA	NA	NA	NA	NA	NA	NA
Hex2Cer 32:0;2	Analyte	11.6	RPonlyESTD	pos	Hex2Cer 34:1;2	Level3	10.3	no	no	10.3	NA	NA	NA	NA	NA	NA	NA	NA	NA	NA	NA	NA	NA	NA	NA	NA	NA	NA	NA	NA	NA	NA	NA	NA	NA	NA	26.2311	NA	NA	NA	NA	NA	NA	NA	NA	NA	NA	NA	NA
Hex2Cer 34:1;2	ESTD	10.3	RPonlyESTD	pos	Hex2Cer 34:1;2	Level1	10.3	no	no	10.3	NA	NA	NA	NA	NA	NA	NA	NA	NA	NA	NA	NA	NA	NA	NA	NA	NA	NA	NA	NA	NA	NA	NA	NA	NA	NA	NA	NA	NA	NA	NA	NA	NA	NA	NA	NA	NA	NA	NA
HexCer 34:1;2	ESTD	11.1	RPMultipoint	pos	HexCer 34:1;2	Level1	11.1	HexCer 36:2;3	Level2	11.4	NA	NA	NA	NA	NA	NA	NA	NA	NA	NA	NA	NA	NA	NA	NA	NA	NA	NA	NA	NA	NA	NA	NA	NA	NA	NA	NA	NA	NA	NA	NA	NA	NA	NA	NA	NA	NA	NA	NA
HexCer 36:1;2	ESTD	12.6	RPMultipoint	pos	HexCer 36:1;2	Level1	12.6	HexCer 36:1;3	Level2	12.2	NA	NA	NA	NA	NA	NA	NA	NA	NA	NA	NA	NA	NA	NA	NA	NA	NA	NA	NA	NA	NA	NA	NA	NA	NA	NA	NA	NA	NA	NA	NA	NA	NA	NA	NA	NA	NA	NA	NA
HexCer 38:1;2	Analyte	13.7	RPMultipoint	pos	HexCer 42:2;2	Level3	14.5	HexCer 37:2;3	Level3	11.9	NA	NA	NA	NA	NA	NA	NA	NA	NA	NA	NA	NA	NA	NA	NA	NA	NA	NA	NA	NA	NA	NA	NA	NA	NA	NA	NA	NA	NA	NA	NA	NA	NA	NA	NA	NA	NA	NA	NA
HexCer 40:1;2	Analyte	14.6	RPMultipoint	pos	HexCer 42:2;2	Level2	14.5	HexCer 37:2;3	Level3	11.9	NA	NA	NA	NA	NA	NA	NA	NA	NA	NA	NA	NA	NA	NA	NA	NA	NA	NA	NA	NA	NA	NA	NA	NA	NA	NA	NA	NA	NA	NA	NA	NA	NA	NA	NA	NA	NA	NA	NA
HexCer 42:1;2	Analyte	15.3	RPMultipoint	pos	HexCer 42:2;2	Level3	14.5	HexCer 37:2;3	Level3	11.9	NA	NA	NA	NA	NA	NA	NA	NA	NA	NA	NA	NA	NA	NA	NA	NA	NA	NA	NA	NA	NA	NA	NA	NA	NA	NA	NA	NA	NA	NA	NA	NA	NA	NA	NA	NA	NA	NA	NA
HexCer 42:2;2	ESTD	14.5	RPMultipoint	pos	HexCer 42:2;2	Level1	14.5	HexCer 37:2;3	Level3	11.9	NA	NA	NA	NA	NA	NA	NA	NA	NA	NA	NA	NA	NA	NA	NA	NA	NA	NA	NA	NA	NA	NA	NA	NA	NA	NA	NA	NA	NA	NA	NA	NA	NA	NA	NA	NA	NA	NA	NA
LPC 14:0	Analyte	2.2	RPMultipoint	pos	LPC 16:0	Level3	2.8	LPC 16:1	Level2	2.3	NA	NA	NA	NA	NA	NA	NA	NA	NA	NA	NA	NA	NA	NA	NA	NA	NA	NA	NA	NA	NA	NA	NA	NA	NA	NA	NA	NA	NA	NA	NA	NA	NA	NA	NA	NA	NA	2.94974	NA
LPC 15:0	Analyte	2.5	RPMultipoint	pos	LPC 16:0	Level2	2.8	LPC 16:0	Level2	2.8	NA	2.95614	3.03525	NA	NA	NA	NA	NA	NA	NA	NA	NA	NA	NA	NA	NA	NA	NA	NA	NA	NA	NA	NA	NA	NA	NA	NA	NA	NA	NA	NA	NA	NA	NA	NA	NA	NA	NA	NA
LPC 16:0	ESTD	2.8	RPMultipoint	pos	LPC 16:0	Level1	2.8	LPC 16:0	Level1	2.8	NA	2.98785	NA	6.74577	6.26824	NA	NA	NA	NA	NA	NA	NA	NA	NA	NA	NA	NA	NA	NA	NA	NA	NA	NA	NA	NA	NA	NA	NA	NA	NA	NA	NA	NA	NA	NA	NA	NA	NA	NA
LPC 16:1	Analyte	2.3	RPMultipoint	pos	LPC 16:0	Level2	2.8	LPC 16:1	Level1	2.3	NA	NA	NA	NA	NA	NA	NA	NA	NA	NA	NA	NA	NA	NA	NA	NA	NA	NA	NA	NA	NA	NA	NA	NA	NA	NA	NA	NA	NA	NA	NA	NA	NA	NA	NA	NA	NA	NA	NA
LPC 17:0	Analyte	3.2	RPMultipoint	pos	LPC 16:0	Level2	2.8	LPC 16:0	Level2	2.8	NA	NA	NA	NA	NA	NA	NA	NA	NA	NA	NA	NA	NA	NA	NA	NA	NA	NA	NA	NA	NA	NA	NA	NA	NA	NA	NA	NA	NA	NA	NA	NA	NA	NA	NA	NA	NA	NA	NA
LPC 18:0	ESTD	3.6	RPMultipoint	pos	LPC 18:0	Level1	3.6	LPC 18:0	Level1	3.6	8.18342	NA	NA	8.97646	8.87772	8.50341	NA	NA	NA	NA	NA	NA	NA	NA	NA	NA	NA	NA	NA	NA	NA	NA	NA	NA	NA	NA	NA	NA	NA	NA	NA	NA	NA	NA	NA	NA	NA	NA	NA
LPC 18:1	DeutISTD	2.8	RPMultipoint	pos	LPC 16:0	Level2	2.8	LPC 18:1	Level1	2.9	602.167	614.044	593.679	2.79149	2.80283	NA	NA	NA	NA	NA	NA	NA	NA	NA	NA	NA	NA	NA	NA	NA	NA	NA	NA	NA	NA	NA	NA	NA	NA	NA	NA	NA	NA	NA	NA	NA	NA	NA	NA
LPC 18:1	Analyte	2.9	RPMultipoint	pos	LPC 16:0	Level2	2.8	LPC 18:1	Level1	2.9	NA	NA	NA	NA	NA	NA	NA	NA	NA	NA	NA	NA	NA	NA	NA	NA	NA	NA	NA	NA	NA	NA	NA	NA	NA	NA	NA	NA	NA	NA	NA	NA	NA	NA	NA	NA	NA	NA	NA
LPC 18:2	Analyte	2.4	RPMultipoint	pos	LPC 16:0	Level2	2.8	LPC 18:2	Level1	2.4	NA	NA	NA	NA	NA	3.20109	NA	NA	NA	NA	NA	NA	NA	NA	NA	NA	NA	NA	NA	NA	NA	NA	NA	NA	NA	NA	NA	NA	NA	NA	NA	NA	NA	NA	NA	NA	3.01786	2.88078	NA
LPC 18:3	Analyte	2.1	RPMultipoint	pos	LPC 18:0	Level3	3.6	LPC 18:3	Level1	2.1	NA	NA	NA	NA	NA	NA	NA	NA	NA	NA	NA	NA	NA	NA	NA	NA	NA	NA	NA	NA	NA	NA	NA	NA	NA	NA	NA	NA	NA	NA	NA	NA	NA	NA	NA	NA	NA	NA	NA
LPC 20:1	Analyte	3.7	RPMultipoint	pos	LPC 18:0	Level2	3.6	LPC 20:1	Level1	3.7	NA	NA	NA	NA	NA	NA	NA	NA	NA	NA	NA	NA	NA	NA	NA	NA	NA	NA	NA	NA	NA	NA	NA	NA	NA	NA	NA	NA	NA	NA	NA	NA	NA	NA	NA	NA	NA	NA	NA
LPC 20:2	Analyte	3	RPMultipoint	pos	LPC 16:0	Level2	2.8	LPC 18:1	Level2	2.9	NA	NA	NA	2.7679	NA	NA	NA	NA	NA	NA	NA	NA	NA	NA	NA	NA	NA	NA	NA	NA	NA	NA	NA	NA	NA	NA	NA	NA	NA	NA	NA	NA	NA	NA	NA	NA	NA	NA	2.81542
LPC 20:3	Analyte	2.6	RPFIAOnepoint	pos	LPC 18:0	Level2	3.6	LPC 18:3	Level2	2.1	NA	NA	NA	NA	NA	NA	NA	NA	NA	73.9591	NA	NA	NA	NA	NA	NA	NA	NA	NA	NA	NA	NA	NA	NA	NA	NA	260.694	NA	NA	NA	NA	NA	NA	NA	NA	NA	NA	NA	NA
LPC 20:4	Analyte	2.3	RPFIAOnepoint	pos	LPC 18:0	Level2	3.6	LPC 18:3	Level2	2.1	NA	NA	NA	NA	NA	NA	NA	372.584	NA	NA	NA	NA	NA	NA	NA	NA	NA	NA	NA	NA	NA	NA	NA	NA	NA	NA	NA	163.047	NA	NA	NA	NA	NA	NA	NA	NA	NA	NA	NA
LPC 20:5	Analyte	2.1	RPMultipoint	pos	LPC 18:0	Level3	3.6	LPC 18:3	Level2	2.1	NA	NA	NA	NA	NA	NA	NA	NA	NA	NA	NA	NA	NA	NA	NA	NA	NA	NA	NA	NA	NA	NA	NA	NA	NA	NA	NA	NA	NA	NA	NA	NA	NA	NA	NA	NA	NA	NA	NA
LPC 22:4	Analyte	2.7	RPMultipoint	pos	LPC 16:0	Level2	2.8	LPC 18:2	Level2	2.4	NA	NA	NA	NA	NA	NA	NA	NA	NA	NA	NA	NA	NA	NA	NA	NA	NA	NA	NA	NA	NA	NA	NA	NA	NA	NA	NA	NA	NA	NA	NA	NA	NA	NA	NA	NA	NA	NA	NA
LPC 22:5	Analyte	2.4	RPMultipoint	pos	LPC 18:0	Level3	3.6	LPC 18:3	Level2	2.1	NA	NA	NA	NA	NA	NA	NA	NA	NA	NA	NA	NA	NA	NA	NA	NA	NA	NA	NA	NA	NA	NA	NA	NA	NA	NA	NA	NA	NA	NA	NA	NA	NA	NA	NA	NA	NA	NA	NA
LPC 22:6	Analyte	2.2	RPFIAOnepoint	pos	LPC 18:0	Level2	3.6	LPC 18:3	Level2	2.1	NA	NA	NA	NA	NA	NA	NA	NA	NA	NA	NA	NA	NA	NA	NA	NA	NA	NA	NA	NA	NA	NA	NA	NA	NA	NA	NA	NA	NA	NA	NA	NA	NA	NA	NA	NA	NA	NA	NA
LPC O-16:0	Analyte	3.2	RPMultipoint	pos	LPC 16:0	Level2	2.8	LPC 16:0	Level2	2.8	NA	NA	NA	NA	NA	NA	NA	NA	NA	NA	NA	NA	NA	NA	NA	NA	NA	NA	NA	NA	NA	NA	NA	NA	NA	NA	NA	NA	NA	NA	NA	NA	NA	NA	NA	NA	NA	NA	NA
LPC O-16:1	Analyte	3.1	RPMultipoint	pos	LPC 16:0	Level2	2.8	LPC 16:0	Level2	2.8	NA	NA	NA	NA	NA	NA	NA	NA	NA	NA	NA	NA	NA	NA	NA	NA	NA	NA	NA	NA	NA	NA	NA	NA	NA	NA	NA	NA	NA	NA	NA	NA	NA	NA	NA	NA	NA	NA	NA
LPC O-18:1	Analyte	4.1	RPMultipoint	pos	LPC 18:0	Level2	3.6	LPC 18:0	Level2	3.6	NA	NA	NA	NA	NA	NA	NA	NA	NA	NA	NA	NA	NA	NA	NA	NA	NA	NA	NA	NA	NA	NA	NA	NA	NA	NA	NA	NA	NA	NA	NA	NA	NA	NA	NA	NA	NA	NA	NA
LPE 16:0	Analyte	2.9	RPMultipoint	neg	LPE 18:0	Level3	3.8	LPE 16:0	Level1	2.9	NA	NA	NA	NA	NA	NA	NA	NA	NA	NA	NA	NA	NA	NA	NA	NA	NA	NA	NA	NA	NA	NA	NA	NA	NA	NA	NA	NA	NA	NA	NA	NA	NA	NA	NA	NA	NA	NA	NA
LPE 18:0	ESTD	3.8	RPMultipoint	neg	LPE 18:0	Level1	3.8	LPE 18:0	Level1	3.8	NA	NA	NA	NA	NA	NA	NA	NA	NA	NA	NA	NA	NA	NA	NA	NA	NA	NA	NA	NA	NA	NA	NA	NA	NA	NA	NA	NA	NA	NA	NA	NA	NA	NA	NA	NA	NA	NA	NA
LPE 18:1	DeutISTD	3	RPMultipoint	neg	LPE 18:0	Level3	3.8	LPE 18:1	Level1	3	192.681	195.925	194.036	NA	NA	NA	NA	NA	NA	NA	NA	NA	NA	NA	NA	NA	NA	NA	NA	NA	NA	NA	NA	NA	NA	NA	NA	NA	NA	NA	NA	NA	NA	NA	NA	NA	NA	NA	NA
LPE 18:1	Analyte	3	RPMultipoint	neg	LPE 18:0	Level3	3.8	LPE 18:1	Level1	3	NA	NA	NA	NA	NA	NA	NA	NA	NA	NA	NA	NA	NA	NA	NA	NA	NA	NA	NA	NA	NA	NA	NA	NA	NA	NA	NA	NA	NA	NA	NA	NA	NA	NA	NA	NA	NA	NA	NA
LPE 18:2	Analyte	2.5	RPMultipoint	neg	LPE 18:0	Level3	3.8	LPE 18:2	Level1	2.5	NA	NA	NA	NA	NA	NA	NA	NA	NA	NA	NA	NA	NA	NA	NA	NA	NA	NA	NA	NA	NA	NA	NA	NA	NA	NA	NA	NA	NA	NA	NA	NA	NA	NA	NA	NA	NA	NA	NA
LPE 18:3	Analyte	2.2	RPMultipoint	neg	LPE 18:0	Level3	3.8	LPE 18:3	Level1	2.2	NA	NA	NA	NA	NA	NA	NA	NA	NA	NA	NA	NA	NA	NA	NA	NA	NA	NA	NA	NA	NA	NA	NA	NA	NA	NA	NA	NA	NA	NA	NA	NA	NA	NA	NA	NA	NA	NA	NA
LPE 20:4	Analyte	2.4	RPMultipoint	neg	LPE 18:0	Level3	3.8	LPE 18:3	Level2	2.2	NA	NA	NA	NA	NA	NA	NA	NA	NA	NA	NA	NA	NA	NA	NA	NA	NA	NA	NA	NA	NA	NA	NA	NA	NA	NA	NA	NA	NA	NA	NA	NA	NA	NA	NA	NA	NA	NA	NA
LPE 22:6	Analyte	2.3	RPMultipoint	neg	LPE 18:0	Level3	3.8	LPE 18:3	Level2	2.2	NA	NA	NA	NA	NA	NA	NA	NA	NA	NA	NA	NA	NA	NA	NA	NA	NA	NA	NA	NA	NA	NA	NA	NA	NA	NA	NA	NA	NA	NA	NA	NA	NA	NA	NA	NA	NA	NA	NA
PC 28:0	Analyte	8.1	RPMultipoint	neg	PC 34:2	Level3	10.7	PC 32:2	Level2	8.5	NA	NA	NA	NA	NA	NA	NA	NA	NA	NA	NA	NA	NA	NA	NA	NA	NA	NA	NA	NA	NA	NA	NA	NA	NA	NA	NA	NA	NA	NA	NA	NA	NA	NA	NA	NA	NA	NA	NA
PC 30:0	Analyte	10.1	RPMultipoint	neg	PC 34:2	Level3	10.7	PC 32:1	Level2	10.4	NA	NA	NA	NA	NA	NA	NA	NA	NA	NA	NA	NA	NA	NA	NA	NA	NA	NA	NA	NA	NA	NA	NA	NA	NA	NA	NA	NA	NA	NA	NA	NA	NA	NA	NA	NA	NA	NA	NA
PC 30:1	Analyte	8.3	RPMultipoint	neg	PC 34:2	Level3	10.7	PC 32:2	Level2	8.5	NA	NA	NA	NA	NA	NA	NA	NA	NA	NA	NA	NA	NA	NA	NA	NA	NA	NA	NA	NA	NA	NA	NA	NA	NA	NA	NA	NA	NA	NA	NA	NA	NA	NA	NA	NA	NA	NA	NA
PC 31:0	Analyte	11.1	RPMultipoint	neg	PC 40:6	Level3	11.7	PC 33:1	Level2	11.3	NA	NA	NA	NA	NA	NA	NA	NA	NA	NA	NA	NA	NA	NA	NA	NA	NA	NA	NA	NA	NA	NA	NA	NA	NA	NA	NA	NA	NA	NA	NA	NA	NA	NA	NA	NA	NA	NA	NA
PC 32:0	ESTD	11.9	RPMultipoint	neg	PC 34:1	Level2	12	PC 34:1	Level2	12	NA	NA	NA	NA	NA	NA	NA	NA	NA	NA	NA	NA	NA	NA	NA	NA	NA	NA	NA	NA	NA	NA	NA	NA	NA	NA	NA	NA	NA	NA	NA	NA	NA	NA	NA	NA	NA	NA	NA
PC 32:1	Analyte	10.3	RPMultipoint	neg	PC 34:2	Level2	10.7	PC 32:1	Level1	10.4	NA	NA	NA	NA	NA	NA	NA	NA	NA	NA	NA	NA	NA	NA	NA	NA	NA	NA	NA	NA	NA	NA	NA	NA	NA	NA	NA	NA	NA	NA	NA	NA	NA	NA	NA	NA	NA	NA	NA
PC 32:2	Analyte	8.7	RPMultipoint	neg	PC 34:2	Level3	10.7	PC 32:2	Level1	8.5	NA	NA	NA	NA	NA	NA	NA	NA	NA	NA	NA	NA	NA	NA	NA	NA	NA	NA	NA	NA	NA	NA	NA	NA	NA	NA	NA	NA	NA	NA	NA	NA	NA	NA	NA	NA	NA	NA	NA
PC 33:0	Analyte	12.3	RPMultipoint	neg	PC 34:1	Level2	12	PC 34:1	Level2	12	NA	NA	NA	NA	NA	NA	NA	NA	NA	NA	NA	NA	NA	NA	NA	NA	NA	NA	NA	NA	NA	NA	NA	NA	NA	NA	NA	NA	NA	NA	NA	NA	NA	NA	NA	NA	NA	NA	NA
PC 33:1	DeutISTD	11.2	RPMultipoint	neg	PC 40:6	Level2	11.7	PC 33:1	Level1	11.3	2896.23	2765.28	3230.2	NA	NA	NA	NA	NA	NA	NA	NA	NA	NA	NA	NA	NA	NA	NA	NA	NA	NA	NA	NA	NA	NA	NA	NA	NA	NA	NA	NA	NA	NA	NA	NA	NA	NA	NA	NA
PC 33:1	Analyte	11.2	RPMultipoint	neg	PC 40:6	Level2	11.7	PC 33:1	Level1	11.3	NA	NA	NA	NA	NA	NA	NA	NA	NA	NA	NA	NA	NA	NA	NA	NA	NA	NA	NA	NA	NA	NA	NA	NA	NA	NA	NA	NA	NA	NA	NA	NA	NA	NA	NA	NA	NA	NA	NA
PC 33:2	Analyte	9.7	RPMultipoint	neg	PC 38:6	Level2	9.8	PC 33:2	Level1	9.6	NA	NA	NA	NA	NA	NA	NA	NA	NA	NA	NA	NA	NA	NA	NA	NA	NA	NA	NA	NA	NA	NA	NA	NA	NA	NA	NA	NA	NA	NA	NA	NA	NA	NA	NA	NA	NA	NA	NA
PC 34:0	ESTD	13.1	RPMultipoint	neg	PC 36:1	Level2	13.2	PC 36:1	Level2	13.2	NA	NA	NA	NA	NA	NA	NA	NA	NA	NA	NA	NA	NA	NA	NA	NA	NA	NA	NA	NA	NA	NA	NA	NA	NA	NA	NA	NA	NA	NA	NA	NA	NA	NA	NA	NA	NA	NA	NA
PC 34:1	ESTD	12	RPMultipoint	neg	PC 34:1	Level1	12	PC 34:1	Level1	12	NA	NA	NA	NA	NA	NA	NA	NA	NA	NA	NA	NA	NA	NA	NA	NA	NA	NA	NA	NA	NA	NA	NA	NA	NA	NA	NA	NA	NA	NA	NA	NA	NA	NA	NA	NA	NA	NA	NA
PC 34:2	ESTD	10.7	RPMultipoint	neg	PC 34:2	Level1	10.7	PC 34:2	Level1	10.7	NA	NA	NA	NA	NA	NA	NA	NA	NA	NA	NA	NA	NA	NA	NA	NA	NA	NA	NA	NA	NA	NA	NA	NA	NA	NA	NA	NA	NA	NA	NA	NA	NA	NA	NA	NA	NA	NA	NA
PC 34:3	Analyte	9.2	RPMultipoint	neg	PC 34:2	Level3	10.7	PC 34:3	Level1	9.3	NA	NA	NA	NA	NA	NA	NA	NA	NA	NA	NA	NA	NA	NA	NA	NA	NA	NA	NA	NA	NA	NA	NA	NA	NA	NA	NA	NA	NA	NA	NA	NA	NA	NA	NA	NA	NA	NA	NA
PC 34:4	Analyte	8.4	RPMultipoint	neg	PC 38:4	Level3	12.1	PC 34:4	Level1	7.6	NA	NA	NA	NA	NA	NA	NA	NA	NA	NA	NA	NA	NA	NA	NA	NA	NA	NA	NA	NA	NA	NA	NA	NA	NA	NA	NA	NA	NA	NA	NA	NA	NA	NA	NA	NA	NA	NA	NA
PC 34:5	Analyte	7.1	RPMultipoint	neg	PC 38:4	Level3	12.1	PC 34:5	Level1	6.3	NA	NA	NA	NA	NA	NA	NA	NA	NA	NA	NA	NA	NA	NA	NA	NA	NA	NA	NA	NA	NA	NA	NA	NA	NA	NA	NA	NA	NA	NA	NA	NA	NA	NA	NA	NA	NA	NA	NA
PC 35:0	Analyte	13.6	RPMultipoint	neg	PC 36:1	Level2	13.2	PC 36:1	Level2	13.2	NA	NA	NA	NA	NA	NA	NA	NA	NA	NA	NA	NA	NA	NA	NA	NA	NA	NA	NA	NA	NA	NA	NA	NA	NA	NA	NA	NA	NA	NA	NA	NA	NA	NA	NA	NA	NA	NA	NA
PC 35:1	Analyte	12.5	RPMultipoint	neg	PC 34:1	Level2	12	PC 34:1	Level2	12	NA	NA	NA	NA	NA	NA	NA	NA	NA	NA	NA	NA	NA	NA	NA	NA	NA	NA	NA	NA	NA	NA	NA	NA	NA	NA	NA	NA	NA	NA	NA	NA	NA	NA	NA	NA	NA	NA	NA
PC 35:2	Analyte	11.4	RPMultipoint	neg	PC 32:0	Level3	11.9	PC 35:2	Level1	11.4	NA	NA	NA	NA	NA	NA	NA	NA	NA	NA	NA	NA	NA	NA	NA	NA	NA	NA	NA	NA	NA	NA	NA	NA	NA	NA	NA	NA	NA	NA	NA	NA	NA	NA	NA	NA	NA	NA	NA
PC 35:3	Analyte	9.9	RPMultipoint	neg	PC 38:6	Level2	9.8	PC 35:3	Level1	9.9	NA	NA	NA	NA	NA	NA	NA	NA	NA	NA	NA	NA	NA	NA	NA	NA	NA	NA	NA	NA	NA	NA	NA	NA	NA	NA	NA	NA	NA	NA	NA	NA	NA	NA	NA	NA	NA	NA	NA
PC 35:4	Analyte	9.4	RPMultipoint	neg	PC 38:4	Level3	12.1	PC 35:4	Level1	8.5	NA	NA	NA	NA	NA	NA	NA	NA	NA	NA	NA	NA	NA	NA	NA	NA	NA	NA	NA	NA	NA	NA	NA	NA	NA	NA	NA	NA	NA	NA	NA	NA	NA	NA	NA	NA	NA	NA	NA
PC 36:0	ESTD	14.1	RPMultipoint	neg	PC 36:1	Level3	13.2	PC 36:1	Level3	13.2	NA	NA	NA	NA	NA	NA	NA	NA	NA	NA	NA	NA	NA	NA	NA	NA	NA	NA	NA	NA	NA	NA	NA	NA	NA	NA	NA	NA	NA	NA	NA	NA	NA	NA	NA	NA	NA	NA	NA
PC 36:1	ESTD	13.2	RPMultipoint	neg	PC 36:1	Level1	13.2	PC 36:1	Level1	13.2	NA	NA	NA	NA	NA	NA	NA	NA	NA	NA	NA	NA	NA	NA	NA	NA	NA	NA	NA	NA	NA	NA	NA	NA	NA	NA	NA	NA	NA	NA	NA	NA	NA	NA	NA	NA	NA	NA	NA
PC 36:2	ESTD	12.4	RPMultipoint	neg	PC 36:2	Level1	12.4	PC 36:2	Level1	12.1	NA	NA	NA	NA	NA	NA	NA	NA	NA	NA	NA	NA	NA	NA	NA	NA	NA	NA	NA	NA	NA	NA	NA	NA	NA	NA	NA	NA	NA	NA	NA	NA	NA	NA	NA	NA	NA	NA	NA
PC 36:3	Analyte	11.2	RPMultipoint	neg	PC 34:2	Level2	10.7	PC 36:3	Level1	10.9	NA	NA	NA	NA	NA	NA	NA	NA	NA	NA	NA	NA	NA	NA	NA	NA	NA	NA	NA	NA	NA	NA	NA	NA	NA	NA	NA	NA	NA	NA	NA	NA	NA	NA	NA	NA	NA	NA	NA
PC 36:5	Analyte	9	RPMultipoint	neg	PC 38:4	Level3	12.1	PC 36:5	Level1	7.9	NA	NA	NA	NA	NA	NA	NA	NA	NA	NA	NA	NA	NA	NA	NA	NA	NA	NA	NA	NA	NA	NA	NA	NA	NA	NA	NA	NA	NA	NA	NA	NA	NA	NA	NA	NA	NA	NA	NA
PC 37:1	Analyte	13.7	RPMultipoint	neg	PC 36:1	Level2	13.2	PC 36:1	Level2	13.2	NA	NA	NA	NA	NA	NA	NA	NA	NA	NA	NA	NA	NA	NA	NA	NA	NA	NA	NA	NA	NA	NA	NA	NA	NA	NA	NA	NA	NA	NA	NA	NA	NA	NA	NA	NA	NA	NA	NA
PC 37:3	Analyte	11.9	RPMultipoint	neg	PC 36:2	Level2	12.4	PC 36:2	Level2	12.1	NA	NA	NA	NA	NA	NA	NA	NA	NA	NA	NA	NA	NA	NA	NA	NA	NA	NA	NA	NA	NA	NA	NA	NA	NA	NA	NA	NA	NA	NA	NA	NA	NA	NA	NA	NA	NA	NA	NA
PC 37:4	Analyte	11.1	RPMultipoint	neg	PC 34:2	Level2	10.7	PC 36:3	Level2	10.9	NA	NA	NA	NA	NA	NA	NA	NA	NA	NA	NA	NA	NA	NA	NA	NA	NA	NA	NA	NA	NA	NA	NA	NA	NA	NA	NA	NA	NA	NA	NA	NA	NA	NA	NA	NA	NA	NA	NA
PC 37:6	Analyte	8.8	RPMultipoint	neg	PC 38:4	Level3	12.1	PC 35:4	Level2	8.5	NA	NA	NA	NA	NA	NA	NA	NA	NA	NA	NA	NA	NA	NA	NA	NA	NA	NA	NA	NA	NA	NA	NA	NA	NA	NA	NA	NA	NA	NA	NA	NA	NA	NA	NA	NA	NA	NA	NA
PC 38:0	Analyte	15	RPMultipoint	neg	PC 36:1	Level3	13.2	PC 36:1	Level3	13.2	NA	NA	NA	NA	NA	NA	NA	NA	NA	NA	NA	NA	NA	NA	NA	NA	NA	NA	NA	NA	NA	NA	NA	NA	NA	NA	NA	NA	NA	NA	NA	NA	NA	NA	NA	NA	NA	NA	NA
PC 38:1	Analyte	14.1	RPMultipoint	neg	PC 36:1	Level3	13.2	PC 36:1	Level3	13.2	NA	NA	NA	NA	NA	NA	NA	NA	NA	NA	NA	NA	NA	NA	NA	NA	NA	NA	NA	NA	NA	NA	NA	NA	NA	NA	NA	NA	NA	NA	NA	NA	NA	NA	NA	NA	NA	NA	NA
PC 38:2	Analyte	13.3	RPMultipoint	neg	PC 36:1	Level2	13.2	PC 36:1	Level2	13.2	NA	NA	NA	NA	NA	NA	NA	NA	NA	NA	NA	NA	NA	NA	NA	NA	NA	NA	NA	NA	NA	NA	NA	NA	NA	NA	NA	NA	NA	NA	NA	NA	NA	NA	NA	NA	NA	NA	NA
PC 38:3	Analyte	12.6	RPMultipoint	neg	PC 36:2	Level2	12.4	PC 36:2	Level2	12.1	NA	NA	NA	NA	NA	NA	NA	NA	NA	NA	NA	NA	NA	NA	NA	NA	NA	NA	NA	NA	NA	NA	NA	NA	NA	NA	NA	NA	NA	NA	NA	NA	NA	NA	NA	NA	NA	NA	NA
PC 38:4	ESTD	12.1	RPMultipoint	neg	PC 36:2	Level2	12.4	PC 36:2	Level2	12.1	NA	NA	NA	NA	NA	NA	NA	NA	NA	NA	NA	NA	NA	NA	NA	NA	NA	NA	NA	NA	NA	NA	NA	NA	NA	NA	NA	NA	NA	NA	NA	NA	NA	NA	NA	NA	NA	NA	NA
PC 38:5	Analyte	10.6	RPMultipoint	neg	PC 34:2	Level2	10.7	PC 36:3	Level2	10.9	NA	NA	NA	NA	NA	NA	NA	NA	NA	NA	NA	NA	NA	NA	NA	NA	NA	NA	NA	NA	NA	NA	NA	NA	NA	NA	NA	NA	NA	NA	NA	NA	NA	NA	NA	NA	NA	NA	NA
PC 38:6	ESTD	9.8	RPMultipoint	neg	PC 38:6	Level1	9.8	PC 36:4	Level2	9.3	NA	NA	NA	NA	NA	NA	NA	NA	NA	NA	NA	NA	NA	NA	NA	NA	NA	NA	NA	NA	NA	NA	NA	NA	NA	NA	NA	NA	NA	NA	NA	NA	NA	NA	NA	NA	NA	NA	NA
PC 40:0	ESTD	15.5	RPMultipoint	neg	PC 36:1	Level3	13.2	PC 36:1	Level3	13.2	NA	NA	NA	NA	NA	NA	NA	NA	NA	NA	NA	NA	NA	NA	NA	NA	NA	NA	NA	NA	NA	NA	NA	NA	NA	NA	NA	NA	NA	NA	NA	NA	NA	NA	NA	NA	NA	NA	NA
PC 40:4	Analyte	12.9	RPMultipoint	neg	PC 36:1	Level2	13.2	PC 36:1	Level2	13.2	NA	NA	NA	NA	NA	NA	NA	NA	NA	NA	NA	NA	NA	NA	NA	NA	NA	NA	NA	NA	NA	NA	NA	NA	NA	NA	NA	NA	NA	NA	NA	NA	NA	NA	NA	NA	NA	NA	NA
PC 40:5	Analyte	12.1	RPMultipoint	neg	PC 36:2	Level2	12.4	PC 36:2	Level2	12.1	NA	NA	NA	NA	NA	NA	NA	NA	NA	NA	NA	NA	NA	NA	NA	NA	NA	NA	NA	NA	NA	NA	NA	NA	NA	NA	NA	NA	NA	NA	NA	NA	NA	NA	NA	NA	NA	NA	NA
PC 40:6	ESTD	11.7	RPMultipoint	neg	PC 36:2	Level3	12.4	PC 36:2	Level2	12.1	NA	NA	NA	NA	NA	NA	NA	NA	NA	NA	NA	NA	NA	NA	NA	NA	NA	NA	NA	NA	NA	NA	NA	NA	NA	NA	NA	NA	NA	NA	NA	NA	NA	NA	NA	NA	NA	NA	NA
PC 40:7	Analyte	10	RPMultipoint	neg	PC 38:6	Level2	9.8	PC 35:3	Level2	9.9	NA	NA	NA	NA	NA	NA	NA	NA	NA	NA	NA	NA	NA	NA	NA	NA	NA	NA	NA	NA	NA	NA	NA	NA	NA	NA	NA	NA	NA	NA	NA	NA	NA	NA	NA	NA	NA	NA	NA
PC 40:8	Analyte	8.5	RPMultipoint	neg	PC 38:4	Level3	12.1	PC 35:4	Level2	8.5	NA	NA	NA	NA	NA	NA	NA	NA	NA	NA	NA	NA	NA	NA	NA	NA	NA	NA	NA	NA	NA	NA	NA	NA	NA	NA	NA	NA	NA	NA	NA	NA	NA	NA	NA	NA	NA	NA	NA
PC O-32:0	Analyte	12.8	RPMultipoint	neg	PC 36:1	Level2	13.2	PC 36:1	Level2	13.2	NA	NA	NA	NA	NA	NA	NA	NA	NA	NA	NA	NA	NA	NA	NA	NA	NA	NA	NA	NA	NA	NA	NA	NA	NA	NA	NA	NA	NA	NA	NA	NA	NA	NA	NA	NA	NA	NA	NA
PC O-34:0	Analyte	13.8	RPMultipoint	neg	PC 34:1	Level3	12	PC 34:1	Level3	12	NA	NA	NA	NA	NA	NA	NA	NA	NA	NA	NA	NA	NA	NA	NA	NA	NA	NA	NA	NA	NA	NA	NA	NA	NA	NA	NA	NA	NA	NA	NA	NA	NA	NA	NA	NA	NA	NA	NA
PC P-32:0	Analyte	12.6	RPMultipoint	neg	PC 36:2	Level2	12.4	PC 36:2	Level2	12.1	NA	NA	NA	NA	NA	NA	NA	NA	NA	NA	NA	NA	NA	NA	NA	NA	NA	NA	NA	NA	NA	NA	NA	NA	NA	NA	NA	NA	NA	NA	NA	NA	NA	NA	NA	NA	NA	NA	NA
PC P-34:0	Analyte	12.8	RPMultipoint	neg	PC 36:1	Level2	13.2	PC 36:1	Level2	13.2	NA	NA	NA	NA	NA	NA	NA	NA	NA	NA	NA	NA	NA	NA	NA	NA	NA	NA	NA	NA	NA	NA	NA	NA	NA	NA	NA	NA	NA	NA	NA	NA	NA	NA	NA	NA	NA	NA	NA
PC P-34:1	Analyte	11.8	RPMultipoint	neg	PC 34:1	Level2	12	PC 34:1	Level2	12	NA	NA	NA	NA	NA	NA	NA	NA	NA	NA	NA	NA	NA	NA	NA	NA	NA	NA	NA	NA	NA	NA	NA	NA	NA	NA	NA	NA	NA	NA	NA	NA	NA	NA	NA	NA	NA	NA	NA
PC P-34:2	Analyte	11.6	RPMultipoint	neg	PC 34:1	Level2	12	PC 34:1	Level2	12	NA	NA	NA	NA	NA	NA	NA	NA	NA	NA	NA	NA	NA	NA	NA	NA	NA	NA	NA	NA	NA	NA	NA	NA	NA	NA	NA	NA	NA	NA	NA	NA	NA	NA	NA	NA	NA	NA	NA
PC P-36:1	ESTD	13.1	RPMultipoint	neg	PC 36:1	Level2	13.2	PC 36:1	Level2	13.2	NA	NA	NA	NA	NA	NA	NA	NA	NA	NA	NA	NA	NA	NA	NA	NA	NA	NA	NA	NA	NA	NA	NA	NA	NA	NA	NA	NA	NA	NA	NA	NA	NA	NA	NA	NA	NA	NA	NA
PC P-36:2	Analyte	11.9	RPMultipoint	neg	PC 36:2	Level2	12.4	PC 36:2	Level2	12.1	NA	NA	NA	NA	NA	NA	NA	NA	NA	NA	NA	NA	NA	NA	NA	NA	NA	NA	NA	NA	NA	NA	NA	NA	NA	NA	NA	NA	NA	NA	NA	NA	NA	NA	NA	NA	NA	NA	NA
PC P-36:3	Analyte	11.6	RPMultipoint	neg	PC 32:0	Level2	11.9	PC 35:2	Level2	11.4	NA	NA	NA	NA	NA	NA	NA	NA	NA	NA	NA	NA	NA	NA	NA	NA	NA	NA	NA	NA	NA	NA	NA	NA	NA	NA	NA	NA	NA	NA	NA	NA	NA	NA	NA	NA	NA	NA	NA
PC P-38:2	Analyte	13.4	RPMultipoint	neg	PC 36:1	Level2	13.2	PC 36:1	Level2	13.2	NA	NA	NA	NA	NA	NA	NA	NA	NA	NA	NA	NA	NA	NA	NA	NA	NA	NA	NA	NA	NA	NA	NA	NA	NA	NA	NA	NA	NA	NA	NA	NA	NA	NA	NA	NA	NA	NA	NA
PC P-38:3	Analyte	12.9	RPMultipoint	neg	PC 36:1	Level2	13.2	PC 36:1	Level2	13.2	NA	NA	NA	NA	NA	NA	NA	NA	NA	NA	NA	NA	NA	NA	NA	NA	NA	NA	NA	NA	NA	NA	NA	NA	NA	NA	NA	NA	NA	NA	NA	NA	NA	NA	NA	NA	NA	NA	NA
PC P-38:4	Analyte	11.7	RPMultipoint	neg	PC 36:2	Level3	12.4	PC 36:2	Level2	12.1	NA	NA	NA	NA	NA	NA	NA	NA	NA	NA	NA	NA	NA	NA	NA	NA	NA	NA	NA	NA	NA	NA	NA	NA	NA	NA	NA	NA	NA	NA	NA	NA	NA	NA	NA	NA	NA	NA	NA
PC P-38:5	Analyte	11.3	RPMultipoint	neg	PC 34:2	Level3	10.7	PC 36:3	Level2	10.9	NA	NA	NA	NA	NA	NA	NA	NA	NA	NA	NA	NA	NA	NA	NA	NA	NA	NA	NA	NA	NA	NA	NA	NA	NA	NA	NA	NA	NA	NA	NA	NA	NA	NA	NA	NA	NA	NA	NA
PC P-38:6	Analyte	10.8	RPMultipoint	neg	PC 34:2	Level2	10.7	PC 36:3	Level2	10.9	NA	NA	NA	NA	NA	NA	NA	NA	NA	NA	NA	NA	NA	NA	NA	NA	NA	NA	NA	NA	NA	NA	NA	NA	NA	NA	NA	NA	NA	NA	NA	NA	NA	NA	NA	NA	NA	NA	NA
PC P-40:3	Analyte	14	RPMultipoint	neg	PC 34:2	Level3	10.7	PC 36:3	Level3	10.9	NA	NA	NA	NA	NA	NA	NA	NA	NA	NA	NA	NA	NA	NA	NA	NA	NA	NA	NA	NA	NA	NA	NA	NA	NA	NA	NA	NA	NA	NA	NA	NA	NA	NA	NA	NA	NA	NA	NA
PC P-40:6	Analyte	11.2	RPMultipoint	neg	PC 34:2	Level2	10.7	PC 36:3	Level2	10.9	NA	NA	NA	NA	NA	NA	NA	NA	NA	NA	NA	NA	NA	NA	NA	NA	NA	NA	NA	NA	NA	NA	NA	NA	NA	NA	NA	NA	NA	NA	NA	NA	NA	NA	NA	NA	NA	NA	NA
PC P-40:7	Analyte	10.9	RPMultipoint	neg	PC 34:2	Level2	10.7	PC 36:3	Level2	10.9	NA	NA	NA	NA	NA	NA	NA	NA	NA	NA	NA	NA	NA	NA	NA	NA	NA	NA	NA	NA	NA	NA	NA	NA	NA	NA	NA	NA	NA	NA	NA	NA	NA	NA	NA	NA	NA	NA	NA
PC P-42:3	Analyte	14.2	RPMultipoint	neg	PC 34:2	Level3	10.7	PC 36:3	Level3	10.9	NA	NA	NA	NA	NA	NA	NA	NA	NA	NA	NA	NA	NA	NA	NA	NA	NA	NA	NA	NA	NA	NA	NA	NA	NA	NA	NA	NA	NA	NA	NA	NA	NA	NA	NA	NA	NA	NA	NA
PC P-42:4	Analyte	13.9	RPMultipoint	neg	PC 38:6	Level3	9.8	PC 36:4	Level3	9.3	NA	NA	NA	NA	NA	NA	NA	NA	NA	NA	NA	NA	NA	NA	NA	NA	NA	NA	NA	NA	NA	NA	NA	NA	NA	NA	NA	NA	NA	NA	NA	NA	NA	NA	NA	NA	NA	NA	NA
PC P-42:5	Analyte	13	RPMultipoint	neg	PC 36:1	Level2	13.2	PC 36:1	Level2	13.2	NA	NA	NA	NA	NA	NA	NA	NA	NA	NA	NA	NA	NA	NA	NA	NA	NA	NA	NA	NA	NA	NA	NA	NA	NA	NA	NA	NA	NA	NA	NA	NA	NA	NA	NA	NA	NA	NA	NA
PC P-44:4	Analyte	14.7	RPMultipoint	neg	PC 38:6	Level3	9.8	PC 36:4	Level3	9.3	NA	NA	NA	NA	NA	NA	NA	NA	NA	NA	NA	NA	NA	NA	NA	NA	NA	NA	NA	NA	NA	NA	NA	NA	NA	NA	NA	NA	NA	NA	NA	NA	NA	NA	NA	NA	NA	NA	NA
PC P-44:5	Analyte	14	RPMultipoint	neg	PC 38:4	Level3	12.1	PC 36:5	Level3	7.9	NA	NA	NA	NA	NA	NA	NA	NA	NA	NA	NA	NA	NA	NA	NA	NA	NA	NA	NA	NA	NA	NA	NA	NA	NA	NA	NA	NA	NA	NA	NA	NA	NA	NA	NA	NA	NA	NA	NA
PE 33:1	DeutISTD	11.7	RPFIAOnepoint	neg	PE 36:2	Level2	12.7	PE 34:2	Level2	11.3	307.455	318.338	304.505	NA	NA	NA	NA	NA	NA	NA	NA	NA	NA	NA	NA	NA	NA	NA	NA	NA	NA	NA	NA	NA	NA	NA	NA	NA	NA	NA	NA	NA	NA	NA	NA	NA	NA	NA	NA
PE 33:1	Analyte	11.8	RPFIAOnepoint	neg	PE 36:2	Level2	12.7	PE 34:2	Level2	11.3	NA	NA	NA	NA	NA	NA	2743.73	NA	NA	NA	NA	NA	NA	NA	NA	NA	NA	NA	NA	NA	NA	NA	NA	NA	95.0802	NA	NA	NA	NA	NA	NA	NA	NA	NA	NA	NA	NA	NA	NA
PE 34:1	ESTD	12.5	RPMultipoint	neg	PE 34:1	Level1	12.5	PE 34:1	Level1	12.5	NA	NA	NA	NA	NA	NA	NA	NA	NA	NA	NA	NA	NA	NA	NA	NA	NA	NA	NA	NA	NA	NA	NA	NA	NA	NA	NA	NA	NA	NA	NA	NA	NA	NA	NA	NA	NA	NA	NA
PE 34:2	Analyte	11.3	RPMultipoint	neg	PE 36:2	Level3	12.7	PE 34:2	Level1	11.3	NA	NA	NA	NA	NA	NA	NA	NA	NA	NA	NA	NA	NA	NA	NA	NA	NA	NA	NA	NA	NA	NA	NA	NA	NA	NA	NA	NA	NA	NA	NA	NA	NA	NA	NA	NA	NA	NA	NA
PE 34:3	Analyte	10	RPFIAOnepoint	neg	PE 36:2	Level2	12.7	PE 34:3	Level1	9.8	NA	NA	NA	NA	NA	NA	19570.9	NA	NA	NA	NA	NA	NA	NA	NA	NA	NA	NA	NA	NA	NA	NA	NA	NA	616.34	NA	NA	NA	NA	NA	NA	NA	NA	NA	NA	NA	NA	NA	NA
PE 36:1	Analyte	13.6	RPFIAOnepoint	neg	PE 36:2	Level2	12.7	PE 36:1	Level1	13.6	NA	NA	NA	NA	NA	NA	18085.3	NA	NA	NA	NA	NA	NA	NA	NA	NA	NA	NA	NA	NA	NA	NA	NA	NA	471.705	NA	NA	NA	NA	NA	NA	NA	NA	NA	NA	NA	NA	NA	NA
PE 36:2	ESTD	12.6	RPMultipoint	neg	PE 36:2	Level1	12.7	PE 36:2	Level1	12.6	NA	NA	NA	NA	NA	NA	NA	NA	NA	NA	NA	NA	NA	NA	NA	NA	NA	NA	NA	NA	NA	NA	NA	NA	NA	NA	NA	NA	NA	NA	NA	NA	NA	NA	NA	NA	NA	NA	NA
PE 36:3	Analyte	11.5	RPFIAOnepoint	neg	PE 36:2	Level2	12.7	PE 34:2	Level2	11.3	NA	NA	NA	NA	NA	NA	45821.9	NA	NA	NA	NA	NA	NA	NA	NA	NA	NA	NA	NA	NA	NA	NA	NA	NA	1359.52	NA	NA	NA	NA	NA	NA	NA	NA	NA	NA	NA	NA	NA	NA
PE 36:4	Analyte	10	RPFIAOnepoint	neg	PE 36:2	Level2	12.7	PE 36:4	Level1	10	NA	NA	NA	NA	NA	NA	46166.4	NA	NA	NA	NA	NA	NA	NA	NA	NA	NA	NA	NA	NA	NA	NA	NA	NA	1364.83	NA	NA	NA	NA	NA	NA	NA	NA	NA	NA	NA	NA	NA	NA
PE 36:5	Analyte	8.5	RPFIAOnepoint	neg	PE 36:2	Level2	12.7	PE 36:5	Level1	8.5	NA	NA	NA	NA	NA	NA	66600.7	NA	NA	NA	NA	NA	NA	NA	NA	NA	NA	NA	NA	NA	NA	NA	NA	NA	2049.4	NA	NA	NA	NA	NA	NA	NA	NA	NA	NA	NA	NA	NA	NA
PE 38:4	Analyte	12.5	RPMultipoint	neg	PE 36:2	Level2	12.7	PE 36:2	Level2	12.6	NA	NA	NA	NA	NA	NA	NA	NA	NA	NA	NA	NA	NA	NA	NA	NA	NA	NA	NA	NA	NA	NA	NA	NA	NA	NA	NA	NA	NA	NA	NA	NA	NA	NA	NA	NA	NA	NA	NA
PE 38:5	Analyte	11.2	RPMultipoint	neg	PE 36:2	Level3	12.7	PE 36:3	Level2	11.5	NA	NA	NA	NA	NA	NA	NA	NA	NA	NA	NA	NA	NA	NA	NA	NA	NA	NA	NA	NA	NA	NA	NA	NA	NA	NA	NA	NA	NA	NA	NA	NA	NA	NA	NA	NA	NA	NA	NA
PE 38:6	Analyte	10.5	RPFIAOnepoint	neg	PE 36:2	Level2	12.7	PE 36:4	Level2	10	NA	NA	NA	NA	NA	NA	NA	NA	NA	NA	NA	NA	NA	NA	NA	NA	NA	NA	NA	NA	NA	NA	NA	NA	NA	NA	NA	NA	NA	NA	NA	NA	NA	NA	NA	NA	NA	NA	NA
PE 40:6	Analyte	12.1	RPMultipoint	neg	PE 36:2	Level2	12.7	PE 36:2	Level2	12.6	NA	NA	NA	NA	NA	NA	NA	NA	NA	NA	NA	NA	NA	NA	NA	NA	NA	NA	NA	NA	NA	NA	NA	NA	NA	NA	NA	NA	NA	NA	NA	NA	NA	NA	NA	NA	NA	NA	NA
PE P-34:1	Analyte	13.2	RPFIAOnepoint	neg	PE 36:2	Level2	12.7	PE 36:1	Level2	13.6	NA	NA	NA	NA	NA	NA	NA	NA	NA	NA	NA	NA	NA	NA	NA	NA	NA	NA	NA	NA	NA	NA	NA	NA	NA	NA	NA	NA	NA	NA	NA	NA	NA	NA	NA	NA	NA	NA	NA
PE P-34:2	Analyte	12.2	RPMultipoint	neg	PE 34:1	Level2	12.5	PE 34:1	Level2	12.5	NA	NA	NA	NA	NA	NA	NA	NA	NA	NA	NA	NA	NA	NA	NA	NA	NA	NA	NA	NA	NA	NA	NA	NA	NA	NA	NA	NA	NA	NA	NA	NA	NA	NA	NA	NA	NA	NA	NA
PE P-36:1	Analyte	14.1	RPMultipoint	neg	PE 34:1	Level3	12.5	PE 36:1	Level3	13.6	NA	NA	NA	NA	NA	NA	NA	NA	NA	NA	NA	NA	NA	NA	NA	NA	NA	NA	NA	NA	NA	NA	NA	NA	NA	NA	NA	NA	NA	NA	NA	NA	NA	NA	NA	NA	NA	NA	NA
PE P-36:2	Analyte	13.4	RPFIAOnepoint	neg	PE 36:2	Level2	12.7	PE 36:1	Level2	13.6	NA	NA	NA	NA	NA	NA	NA	NA	NA	NA	NA	NA	NA	NA	NA	NA	NA	NA	NA	NA	NA	NA	NA	NA	NA	NA	NA	NA	NA	NA	NA	NA	NA	NA	NA	NA	NA	NA	NA
PE P-36:3	Analyte	12.2	RPMultipoint	neg	PE 36:2	Level2	12.7	PE 36:2	Level2	12.6	NA	NA	NA	NA	NA	NA	NA	NA	NA	NA	NA	NA	NA	NA	NA	NA	NA	NA	NA	NA	NA	NA	NA	NA	NA	NA	NA	NA	NA	NA	NA	NA	NA	NA	NA	NA	NA	NA	NA
PE P-36:4	Analyte	11.9	RPMultipoint	neg	PE 36:2	Level3	12.7	PE 36:3	Level2	11.5	NA	NA	NA	NA	NA	NA	NA	NA	NA	NA	NA	NA	NA	NA	NA	NA	NA	NA	NA	NA	NA	NA	NA	NA	NA	NA	NA	NA	NA	NA	NA	NA	NA	NA	NA	NA	NA	NA	NA
PE P-36:5	Analyte	10.8	RPMultipoint	neg	PE 36:2	Level3	12.7	PE 36:5	Level3	8.5	NA	NA	NA	NA	NA	NA	NA	NA	NA	NA	NA	NA	NA	NA	NA	NA	NA	NA	NA	NA	NA	NA	NA	NA	NA	NA	NA	NA	NA	NA	NA	NA	NA	NA	NA	NA	NA	NA	NA
PE P-38:3	Analyte	13.4	RPFIAOnepoint	neg	PE 36:2	Level2	12.7	PE 36:1	Level2	13.6	NA	NA	NA	NA	NA	NA	NA	NA	NA	NA	NA	NA	NA	NA	NA	NA	NA	NA	NA	NA	NA	NA	NA	NA	NA	NA	NA	NA	NA	NA	NA	NA	NA	NA	NA	NA	NA	NA	NA
PE P-38:4	Analyte	13.2	RPMultipoint	neg	PE 34:1	Level3	12.5	PE 36:1	Level2	13.6	NA	NA	NA	NA	NA	NA	NA	NA	NA	NA	NA	NA	NA	NA	NA	NA	NA	NA	NA	NA	NA	NA	NA	NA	NA	NA	NA	NA	NA	NA	NA	NA	NA	NA	NA	NA	NA	NA	NA
PE P-38:5	Analyte	12	RPMultipoint	neg	PE 34:1	Level2	12.5	PE 34:1	Level2	12.5	NA	NA	NA	NA	NA	NA	NA	NA	NA	NA	NA	NA	NA	NA	NA	NA	NA	NA	NA	NA	NA	NA	NA	NA	NA	NA	NA	NA	NA	NA	NA	NA	NA	NA	NA	NA	NA	NA	NA
PE P-38:6	Analyte	11.4	RPFIAOnepoint	neg	PE 36:2	Level2	12.7	PE 34:2	Level2	11.3	NA	NA	NA	NA	NA	NA	NA	NA	NA	1471.54	NA	NA	NA	NA	NA	NA	NA	NA	NA	NA	NA	NA	NA	NA	NA	NA	NA	NA	NA	NA	NA	NA	NA	NA	NA	NA	NA	NA	NA
PE P-40:4	Analyte	14.2	RPMultipoint	neg	PE 36:2	Level3	12.7	PE 36:4	Level3	10	NA	NA	NA	NA	NA	NA	NA	NA	NA	NA	NA	NA	NA	NA	NA	NA	NA	NA	NA	NA	NA	NA	NA	NA	NA	NA	NA	NA	NA	NA	NA	NA	NA	NA	NA	NA	NA	NA	NA
PE P-40:5	Analyte	13.2	RPFIAOnepoint	neg	PE 36:2	Level2	12.7	PE 36:1	Level2	13.6	NA	NA	NA	NA	NA	NA	NA	NA	NA	NA	NA	NA	NA	NA	NA	NA	NA	NA	NA	NA	NA	NA	NA	NA	NA	NA	NA	NA	NA	NA	NA	NA	NA	NA	NA	NA	NA	NA	NA
PE P-40:6	Analyte	12.8	RPMultipoint	neg	PE 36:2	Level2	12.7	PE 36:2	Level2	12.6	NA	NA	NA	NA	NA	NA	NA	NA	NA	NA	NA	NA	NA	NA	NA	NA	NA	NA	NA	NA	NA	NA	NA	NA	NA	NA	NA	NA	NA	NA	NA	NA	NA	NA	NA	NA	NA	NA	NA
PE P-40:7	Analyte	11.6	RPFIAOnepoint	neg	PE 36:2	Level2	12.7	PE 34:2	Level2	11.3	NA	NA	NA	NA	NA	NA	NA	NA	NA	NA	NA	NA	NA	NA	NA	NA	NA	NA	NA	NA	NA	NA	NA	NA	NA	NA	NA	NA	NA	NA	NA	NA	NA	NA	NA	NA	NA	NA	NA
PG 33:1	DeutISTD	10	RPMultipoint	neg	PG 36:2	Level2	10.3	PG 34:2	Level2	9.5	2443.15	1362.69	1193.59	NA	NA	NA	NA	NA	NA	NA	NA	NA	NA	NA	NA	NA	NA	NA	NA	NA	NA	NA	NA	NA	NA	NA	NA	NA	NA	NA	NA	NA	NA	NA	NA	NA	NA	NA	NA
PG 34:1	ESTD	10.9	RPFIAOnepoint	neg	PG 34:1	Level1	10.9	PG 34:1	Level1	11	NA	NA	NA	NA	NA	NA	NA	NA	NA	NA	NA	NA	NA	NA	NA	NA	NA	NA	NA	NA	NA	NA	NA	NA	NA	NA	NA	NA	NA	NA	NA	NA	NA	NA	NA	NA	5.74203	5.5766	5.41999
PG 34:2	Analyte	9.5	RPMultipoint	neg	PG 36:2	Level3	10.3	PG 34:2	Level1	9.5	NA	NA	NA	NA	NA	NA	NA	NA	NA	NA	NA	NA	NA	NA	NA	NA	NA	NA	NA	NA	NA	NA	NA	NA	NA	NA	NA	NA	NA	NA	NA	NA	NA	NA	NA	NA	NA	NA	NA
PG 36:1	Analyte	11.4	RPFIAOnepoint	neg	PG 34:1	Level2	10.9	PG 34:1	Level2	11	NA	NA	NA	NA	NA	NA	NA	NA	NA	NA	NA	NA	NA	NA	NA	NA	NA	NA	NA	NA	NA	NA	NA	NA	NA	NA	NA	NA	NA	NA	NA	NA	NA	NA	NA	NA	NA	NA	NA
PG 36:2	ESTD	10.3	RPMultipoint	neg	PG 36:2	Level1	10.3	PG 36:2	Level1	10.4	NA	NA	NA	NA	NA	NA	NA	NA	NA	NA	NA	NA	NA	NA	NA	NA	NA	NA	NA	NA	NA	NA	NA	NA	NA	NA	NA	NA	NA	NA	NA	NA	NA	NA	NA	NA	NA	NA	NA
PI 33:1	DeutISTD	9.4	RPMultipoint	neg	PI 34:1	Level3	10.6	PI 34:2	Level2	9	179.404	183.297	171.975	NA	NA	NA	NA	NA	NA	NA	NA	NA	NA	NA	NA	NA	NA	NA	NA	NA	NA	NA	NA	NA	NA	NA	NA	NA	NA	NA	NA	NA	NA	NA	NA	NA	NA	NA	NA
PI 34:1	ESTD	10.6	RPMultipoint	neg	PI 34:1	Level1	10.6	PI 34:1	Level1	10.6	NA	NA	NA	NA	NA	NA	NA	NA	NA	NA	NA	NA	NA	NA	NA	NA	NA	NA	NA	NA	NA	NA	NA	NA	NA	NA	NA	NA	NA	NA	NA	NA	NA	NA	NA	NA	NA	NA	NA
PI 34:2	Analyte	9	RPMultipoint	neg	PI 34:1	Level3	10.6	PI 34:2	Level1	9	NA	NA	NA	NA	NA	NA	NA	NA	NA	NA	NA	NA	NA	NA	NA	NA	NA	NA	NA	NA	NA	NA	NA	NA	NA	NA	NA	NA	NA	NA	NA	NA	NA	NA	NA	NA	NA	NA	NA
PI 36:1	Analyte	12.1	RPMultipoint	neg	PI 34:1	Level3	10.6	PI 36:1	Level1	12.1	NA	NA	NA	NA	NA	NA	NA	NA	NA	NA	NA	NA	NA	NA	NA	NA	NA	NA	NA	NA	NA	NA	NA	NA	NA	NA	NA	NA	NA	NA	NA	NA	NA	NA	NA	NA	NA	NA	NA
PI 36:2	Analyte	11	RPMultipoint	neg	PI 34:1	Level2	10.6	PI 36:2	Level1	11	NA	NA	NA	NA	NA	NA	NA	NA	NA	NA	NA	NA	NA	NA	NA	NA	NA	NA	NA	NA	NA	NA	NA	NA	NA	NA	NA	NA	NA	NA	NA	NA	NA	NA	NA	NA	NA	NA	NA
PI 36:3	Analyte	9.5	RPMultipoint	neg	PI 34:1	Level3	10.6	PI 34:2	Level2	9	NA	NA	NA	NA	NA	NA	NA	NA	NA	NA	NA	NA	NA	NA	NA	NA	NA	NA	NA	NA	NA	NA	NA	NA	NA	NA	NA	NA	NA	NA	NA	NA	NA	NA	NA	NA	NA	NA	NA
PI 36:4	Analyte	8.7	RPMultipoint	neg	PI 34:1	Level3	10.6	PI 34:2	Level2	9	NA	NA	NA	NA	NA	NA	NA	NA	NA	NA	NA	NA	NA	NA	NA	NA	NA	NA	NA	NA	NA	NA	NA	NA	NA	NA	NA	NA	NA	NA	NA	NA	NA	NA	NA	NA	NA	NA	NA
PI 38:3	Analyte	11.4	RPMultipoint	neg	PI 34:1	Level3	10.6	PI 36:2	Level2	11	NA	NA	NA	NA	NA	NA	NA	NA	NA	NA	NA	NA	NA	NA	NA	NA	NA	NA	NA	NA	NA	NA	NA	NA	NA	NA	NA	NA	NA	NA	NA	NA	NA	NA	NA	NA	NA	NA	NA
PI 38:4	Analyte	10.7	RPMultipoint	neg	PI 34:1	Level2	10.6	PI 36:2	Level2	11	NA	NA	NA	NA	NA	NA	NA	NA	NA	NA	NA	NA	NA	NA	NA	NA	NA	NA	NA	NA	NA	NA	NA	NA	NA	NA	NA	NA	NA	NA	NA	NA	NA	NA	NA	NA	NA	NA	NA
PI 38:5	Analyte	9	RPMultipoint	neg	PI 34:1	Level3	10.6	PI 34:2	Level2	9	NA	NA	NA	NA	NA	NA	NA	NA	NA	NA	NA	NA	NA	NA	NA	NA	NA	NA	NA	NA	NA	NA	NA	NA	NA	NA	NA	NA	NA	NA	NA	NA	NA	NA	NA	NA	NA	NA	NA
PI 40:4	Analyte	11.8	RPMultipoint	neg	PI 34:1	Level3	10.6	PI 36:1	Level2	12.1	NA	NA	NA	NA	NA	NA	NA	NA	NA	NA	NA	NA	NA	NA	NA	NA	NA	NA	NA	NA	NA	NA	NA	NA	NA	NA	NA	NA	NA	NA	NA	NA	NA	NA	NA	NA	NA	NA	NA
PI 40:6	Analyte	10.2	RPMultipoint	neg	PI 34:1	Level2	10.6	PI 34:1	Level2	10.6	NA	NA	NA	NA	NA	NA	NA	NA	NA	NA	NA	NA	NA	NA	NA	NA	NA	NA	NA	NA	NA	NA	NA	NA	NA	NA	NA	NA	NA	NA	NA	NA	NA	NA	NA	NA	NA	NA	NA
PS 36:1	Analyte	12.5	RPMultipoint	neg	PS 36:2	Level3	11.3	PS 36:1	Level1	12.5	NA	NA	NA	NA	NA	NA	NA	NA	NA	NA	NA	NA	NA	NA	NA	NA	NA	NA	NA	NA	NA	NA	NA	NA	NA	NA	NA	NA	NA	NA	NA	NA	NA	NA	NA	NA	NA	NA	NA
PS 36:2	ESTD	11.3	RPMultipoint	neg	PS 36:2	Level1	11.3	PS 36:2	Level1	11.3	NA	24.1629	NA	24.1097	NA	NA	NA	NA	NA	NA	NA	NA	NA	NA	NA	NA	NA	NA	NA	NA	NA	NA	NA	NA	NA	NA	NA	NA	NA	NA	NA	NA	NA	NA	NA	NA	NA	NA	NA
SM 30:1;2	Analyte	6.4	RPonlyESTD	neg	SM 36:2;2	Level3	10.6	no	no	10.6	NA	NA	NA	NA	NA	NA	NA	NA	NA	NA	NA	NA	NA	NA	NA	NA	NA	NA	NA	NA	NA	NA	NA	NA	NA	NA	NA	NA	NA	NA	NA	NA	NA	NA	NA	NA	NA	NA	NA
SM 31:1;2	Analyte	7.3	RPonlyESTD	neg	SM 36:2;2	Level3	10.6	no	no	10.6	NA	NA	NA	NA	NA	NA	NA	NA	NA	NA	NA	NA	NA	NA	NA	NA	NA	NA	NA	NA	NA	NA	NA	NA	NA	NA	NA	NA	NA	NA	NA	NA	NA	NA	NA	NA	NA	NA	NA
SM 32:1;2	Analyte	8.3	RPonlyESTD	neg	SM 36:2;2	Level3	10.6	no	no	10.6	NA	NA	NA	NA	NA	NA	NA	NA	NA	NA	NA	NA	NA	NA	NA	NA	NA	NA	NA	NA	NA	NA	NA	NA	NA	NA	NA	NA	NA	NA	NA	NA	NA	NA	NA	NA	NA	NA	NA
SM 32:2;2	Analyte	6.6	RPonlyESTD	neg	SM 36:2;2	Level3	10.6	no	no	10.6	NA	NA	NA	NA	NA	NA	NA	NA	NA	NA	NA	NA	NA	NA	NA	NA	NA	NA	NA	NA	NA	NA	NA	NA	NA	NA	NA	NA	NA	NA	NA	NA	NA	NA	NA	NA	NA	NA	NA
SM 33:1;2	Analyte	9.3	RPonlyESTD	neg	SM 36:2;2	Level3	10.6	no	no	10.6	NA	NA	NA	NA	NA	NA	NA	NA	NA	NA	NA	NA	NA	NA	NA	NA	NA	NA	NA	NA	NA	NA	NA	NA	NA	NA	NA	NA	NA	NA	NA	NA	NA	NA	NA	NA	NA	NA	NA
SM 33:2;2	Analyte	7.6	RPonlyESTD	neg	SM 36:2;2	Level3	10.6	no	no	10.6	NA	NA	NA	NA	NA	NA	NA	NA	NA	NA	NA	NA	NA	NA	NA	NA	NA	NA	NA	NA	NA	NA	NA	NA	NA	NA	NA	NA	NA	NA	NA	NA	NA	NA	NA	NA	NA	NA	NA
SM 34:1;2	Analyte	10.3	RPonlyESTD	neg	SM 36:2;2	Level2	10.6	no	no	10.6	NA	NA	NA	NA	NA	NA	NA	NA	NA	NA	NA	NA	NA	NA	NA	NA	NA	NA	NA	NA	NA	NA	NA	NA	NA	NA	NA	NA	NA	NA	NA	NA	NA	NA	NA	NA	NA	NA	NA
SM 34:2;2	Analyte	8.5	RPonlyESTD	neg	SM 36:2;2	Level3	10.6	no	no	10.6	NA	NA	NA	NA	NA	NA	NA	NA	NA	NA	NA	NA	NA	NA	NA	NA	NA	NA	NA	NA	NA	NA	NA	NA	NA	NA	NA	NA	NA	NA	NA	NA	NA	NA	NA	NA	NA	NA	NA
SM 35:1;2	Analyte	11.3	RPonlyESTD	neg	SM 36:2;2	Level3	10.6	no	no	10.6	NA	NA	NA	NA	NA	NA	NA	NA	NA	NA	NA	NA	NA	NA	NA	NA	NA	NA	NA	NA	NA	NA	NA	NA	NA	NA	NA	NA	NA	NA	NA	NA	NA	NA	NA	NA	NA	NA	NA
SM 35:2;2	Analyte	9.6	RPonlyESTD	neg	SM 36:2;2	Level3	10.6	no	no	10.6	NA	NA	NA	NA	NA	NA	NA	NA	NA	NA	NA	NA	NA	NA	NA	NA	NA	NA	NA	NA	NA	NA	NA	NA	NA	NA	NA	NA	NA	NA	NA	NA	NA	NA	NA	NA	NA	NA	NA
SM 36:1;2	Analyte	12.1	RPonlyESTD	neg	SM 36:2;2	Level3	10.6	no	no	10.6	NA	NA	NA	NA	NA	NA	NA	NA	NA	NA	NA	NA	NA	NA	NA	NA	NA	NA	NA	NA	NA	NA	NA	NA	NA	NA	NA	NA	NA	NA	NA	NA	NA	NA	NA	NA	NA	NA	NA
SM 36:2;2	DeutISTD	10.5	RPonlyESTD	neg	SM 36:2;2	Level1	10.6	no	no	10.6	1302.04	1375.22	1480.51	NA	NA	NA	NA	NA	NA	NA	NA	NA	NA	NA	NA	NA	NA	NA	NA	NA	NA	NA	NA	NA	NA	NA	NA	NA	NA	NA	NA	NA	NA	NA	NA	NA	NA	NA	NA
SM 36:2;2	ESTD	10.6	RPonlyESTD	neg	SM 36:2;2	Level1	10.6	no	no	10.6	NA	NA	NA	NA	NA	NA	NA	NA	NA	NA	NA	NA	NA	NA	NA	NA	NA	NA	NA	NA	NA	NA	NA	NA	NA	NA	NA	NA	NA	NA	NA	NA	NA	NA	NA	NA	NA	NA	NA
SM 36:3;2	Analyte	9	RPonlyESTD	neg	SM 36:2;2	Level3	10.6	no	no	10.6	NA	NA	NA	NA	NA	NA	NA	NA	NA	NA	NA	NA	NA	NA	NA	NA	NA	NA	NA	NA	NA	NA	NA	NA	NA	NA	NA	NA	NA	NA	NA	NA	NA	NA	NA	NA	NA	NA	NA
SM 38:1;2	Analyte	13.4	RPonlyESTD	neg	SM 36:2;2	Level3	10.6	no	no	10.6	NA	NA	NA	NA	NA	NA	NA	NA	NA	NA	NA	NA	NA	NA	NA	NA	NA	NA	NA	NA	NA	NA	NA	NA	NA	NA	NA	NA	NA	NA	NA	NA	NA	NA	NA	NA	NA	NA	NA
SM 38:2;2	Analyte	12.3	RPonlyESTD	neg	SM 36:2;2	Level3	10.6	no	no	10.6	NA	NA	NA	NA	NA	NA	NA	NA	NA	NA	NA	NA	NA	NA	NA	NA	NA	NA	NA	NA	NA	NA	NA	NA	NA	NA	NA	NA	NA	NA	NA	NA	NA	NA	NA	NA	NA	NA	NA
SM 39:2;2	Analyte	12.9	RPonlyESTD	neg	SM 36:2;2	Level3	10.6	no	no	10.6	NA	NA	NA	NA	NA	NA	NA	NA	NA	NA	NA	NA	NA	NA	NA	NA	NA	NA	NA	NA	NA	NA	NA	NA	NA	NA	NA	NA	NA	NA	NA	NA	NA	NA	NA	NA	NA	NA	NA
SM 40:1;2	Analyte	14.3	RPonlyESTD	neg	SM 36:2;2	Level3	10.6	no	no	10.6	NA	NA	NA	NA	NA	NA	NA	NA	NA	NA	NA	NA	NA	NA	NA	NA	NA	NA	NA	NA	NA	NA	NA	NA	NA	NA	NA	NA	NA	NA	NA	NA	NA	NA	NA	NA	NA	NA	NA
SM 40:2;2	Analyte	13.5	RPonlyESTD	neg	SM 36:2;2	Level3	10.6	no	no	10.6	NA	NA	NA	NA	NA	NA	NA	NA	NA	NA	NA	NA	NA	NA	NA	NA	NA	NA	NA	NA	NA	NA	NA	NA	NA	NA	NA	NA	NA	NA	NA	NA	NA	NA	NA	NA	NA	NA	NA
SM 40:3;2	Analyte	12.3	RPonlyESTD	neg	SM 36:2;2	Level3	10.6	no	no	10.6	NA	NA	NA	NA	NA	NA	NA	NA	NA	NA	NA	NA	NA	NA	NA	NA	NA	NA	NA	NA	NA	NA	NA	NA	NA	NA	NA	NA	NA	NA	NA	NA	NA	NA	NA	NA	NA	NA	NA
SM 42:2;2	Analyte	14.2	RPonlyESTD	neg	SM 36:2;2	Level3	10.6	no	no	10.6	NA	NA	NA	NA	NA	NA	NA	NA	NA	NA	NA	NA	NA	NA	NA	NA	NA	NA	NA	NA	NA	NA	NA	NA	NA	NA	NA	NA	NA	NA	NA	NA	NA	NA	NA	NA	NA	NA	NA
SM 42:3;2	Analyte	13.4	RPonlyESTD	neg	SM 36:2;2	Level3	10.6	no	no	10.6	NA	NA	NA	NA	NA	NA	NA	NA	NA	NA	NA	NA	NA	NA	NA	NA	NA	NA	NA	NA	NA	NA	NA	NA	NA	NA	NA	NA	NA	NA	NA	NA	NA	NA	NA	NA	NA	NA	NA
SM 42:4;2	Analyte	12.4	RPonlyESTD	neg	SM 36:2;2	Level3	10.6	no	no	10.6	NA	NA	NA	NA	NA	NA	NA	NA	NA	NA	NA	NA	NA	NA	NA	NA	NA	NA	NA	NA	NA	NA	NA	NA	NA	NA	NA	NA	NA	NA	NA	NA	NA	NA	NA	NA	NA	NA	NA
SM 44:3;2	Analyte	14.3	RPonlyESTD	neg	SM 36:2;2	Level3	10.6	no	no	10.6	NA	NA	NA	NA	NA	NA	NA	NA	NA	NA	NA	NA	NA	NA	NA	NA	NA	NA	NA	NA	NA	NA	NA	NA	NA	NA	NA	NA	NA	NA	NA	NA	NA	NA	NA	NA	NA	NA	NA
SPH 18:0;3	Analyte	2.4	RPMultipoint	pos	SPH 18:1;2	Level2	2.4	SPH 18:0;2	Level2	2.6	NA	NA	NA	NA	NA	NA	NA	NA	NA	NA	NA	NA	NA	NA	NA	NA	NA	NA	NA	NA	NA	NA	NA	NA	NA	NA	NA	NA	NA	NA	NA	NA	NA	NA	NA	NA	NA	NA	NA
SPH 18:1;2	ESTD	2.4	RPMultipoint	pos	SPH 18:1;2	Level1	2.4	SPH 18:0;2	Level2	2.6	NA	NA	NA	NA	NA	NA	NA	NA	NA	NA	NA	NA	NA	NA	NA	NA	NA	NA	NA	NA	NA	NA	NA	NA	NA	NA	NA	NA	NA	NA	NA	NA	NA	NA	NA	NA	NA	NA	NA
Sitosterol	ESTD	12.8	RPFIAOnepoint	pos	Cholesterol	Level2	11.5	Ergosterol	Level3	10.1	NA	NA	NA	NA	NA	NA	NA	NA	NA	NA	NA	NA	NA	NA	NA	NA	NA	NA	NA	NA	NA	NA	NA	NA	NA	NA	NA	NA	NA	NA	NA	NA	NA	NA	NA	NA	NA	NA	NA
Stigmasterol	ESTD	12.3	RPFIAOnepoint	pos	Cholesterol	Level2	11.5	Ergosterol	Level3	10.1	NA	NA	NA	NA	NA	NA	NA	NA	NA	NA	NA	NA	NA	NA	NA	NA	NA	NA	NA	NA	NA	NA	NA	NA	NA	NA	NA	NA	NA	NA	NA	NA	NA	NA	NA	NA	NA	NA	NA
TG 38:0	Analyte	15.9	RPFIAOnepoint	pos	TG 54:6	Level2	16.8	TG 52:7	Level2	16.2	NA	NA	NA	NA	NA	NA	NA	NA	NA	NA	NA	NA	NA	NA	NA	NA	NA	NA	NA	NA	NA	NA	NA	NA	NA	NA	NA	NA	NA	NA	NA	NA	NA	NA	NA	NA	NA	NA	NA
TG 40:0	Analyte	16.3	RPMultipoint	pos	TG 48:3	Level2	16.7	TG 48:3	Level2	16.7	NA	NA	NA	NA	NA	NA	NA	NA	NA	NA	NA	NA	NA	NA	NA	NA	NA	NA	NA	NA	NA	NA	NA	NA	NA	NA	NA	NA	NA	NA	NA	NA	NA	NA	NA	NA	NA	NA	NA
TG 40:1	Analyte	16	RPFIAOnepoint	pos	TG 54:6	Level2	16.8	TG 50:5	Level2	16.5	NA	NA	NA	NA	NA	NA	71.3491	NA	NA	NA	NA	NA	NA	NA	474.536	NA	NA	NA	NA	NA	NA	NA	NA	NA	183.428	43.8622	NA	120.469	NA	NA	NA	NA	NA	NA	NA	NA	NA	NA	NA
TG 42:0	ESTD	16.6	RPMultipoint	pos	TG 48:3	Level2	16.7	TG 48:2	Level2	16.9	NA	NA	NA	NA	NA	NA	NA	NA	NA	NA	NA	NA	NA	NA	NA	NA	NA	NA	NA	NA	NA	NA	NA	NA	NA	NA	NA	NA	NA	NA	NA	NA	NA	NA	NA	NA	NA	NA	NA
TG 42:1	Analyte	16.3	RPMultipoint	pos	TG 48:3	Level2	16.7	TG 48:3	Level2	16.7	NA	NA	NA	NA	NA	NA	NA	NA	NA	NA	NA	NA	NA	NA	NA	NA	NA	NA	NA	NA	NA	NA	NA	NA	NA	NA	NA	NA	NA	NA	NA	NA	NA	NA	NA	NA	NA	NA	NA
TG 42:2	Analyte	16	RPFIAOnepoint	pos	TG 54:6	Level2	16.8	TG 50:5	Level2	16.5	NA	NA	NA	NA	NA	NA	10.2127	NA	NA	NA	NA	NA	NA	NA	19.2111	NA	NA	NA	NA	NA	NA	NA	NA	NA	NA	NA	NA	NA	NA	NA	NA	NA	NA	NA	NA	NA	NA	NA	NA
TG 44:0	Analyte	16.9	RPMultipoint	pos	TG 48:3	Level2	16.7	TG 48:2	Level2	16.9	NA	NA	NA	NA	NA	NA	NA	NA	NA	NA	NA	NA	NA	NA	NA	NA	NA	NA	NA	NA	NA	NA	NA	NA	NA	NA	NA	NA	NA	NA	NA	NA	NA	NA	NA	NA	NA	NA	NA
TG 44:1	Analyte	16.6	RPMultipoint	pos	TG 48:3	Level2	16.7	TG 48:2	Level2	16.9	NA	NA	NA	NA	NA	NA	NA	NA	NA	NA	NA	NA	NA	NA	NA	NA	NA	NA	NA	NA	NA	NA	NA	NA	NA	NA	NA	NA	NA	NA	NA	NA	NA	NA	NA	NA	NA	NA	NA
TG 44:2	Analyte	16.4	RPMultipoint	pos	TG 48:3	Level2	16.7	TG 48:3	Level2	16.7	NA	NA	NA	NA	NA	NA	NA	NA	NA	NA	NA	NA	NA	NA	NA	NA	NA	NA	NA	NA	NA	NA	NA	NA	NA	NA	NA	NA	NA	NA	NA	NA	NA	NA	NA	NA	NA	NA	NA
TG 44:3	Analyte	16.1	RPFIAOnepoint	pos	TG 54:6	Level2	16.8	TG 50:5	Level2	16.5	NA	NA	NA	NA	NA	NA	25.2304	NA	NA	71.71	NA	NA	NA	NA	NA	NA	NA	NA	NA	NA	NA	NA	NA	NA	24.514	NA	NA	NA	NA	NA	NA	NA	NA	NA	NA	NA	NA	NA	NA
TG 45:0	Analyte	17	RPMultipoint	pos	TG 48:3	Level2	16.7	TG 48:2	Level2	16.9	NA	NA	NA	NA	NA	NA	NA	NA	NA	NA	NA	NA	NA	NA	NA	NA	NA	NA	NA	NA	NA	NA	NA	NA	NA	NA	NA	NA	NA	NA	NA	NA	NA	NA	NA	NA	NA	NA	NA
TG 45:1	Analyte	16.8	RPMultipoint	pos	TG 48:3	Level2	16.7	TG 48:2	Level2	16.9	NA	NA	NA	NA	NA	NA	NA	NA	NA	NA	NA	NA	NA	NA	NA	NA	NA	NA	NA	NA	NA	NA	NA	NA	NA	NA	NA	NA	NA	NA	NA	NA	NA	NA	NA	NA	NA	NA	NA
TG 45:2	Analyte	16.5	RPMultipoint	pos	TG 48:3	Level2	16.7	TG 48:2	Level2	16.9	NA	NA	NA	NA	NA	NA	NA	NA	NA	NA	NA	NA	NA	NA	NA	NA	NA	NA	NA	NA	NA	NA	NA	NA	NA	NA	NA	NA	NA	NA	NA	NA	NA	NA	NA	NA	NA	NA	NA
TG 46:0	Analyte	17.1	RPMultipoint	pos	TG 48:3	Level2	16.7	TG 48:2	Level2	16.9	NA	NA	NA	NA	NA	NA	NA	NA	NA	NA	NA	NA	NA	NA	NA	NA	NA	NA	NA	NA	NA	NA	NA	NA	NA	NA	NA	NA	NA	NA	NA	NA	NA	NA	NA	NA	NA	NA	NA
TG 46:1	Analyte	16.9	RPMultipoint	pos	TG 48:3	Level2	16.7	TG 48:2	Level2	16.9	NA	NA	NA	NA	NA	NA	NA	NA	NA	NA	NA	NA	NA	NA	NA	NA	NA	NA	NA	NA	NA	NA	NA	NA	NA	NA	NA	NA	NA	NA	NA	NA	NA	NA	NA	NA	NA	NA	NA
TG 46:2	Analyte	16.7	RPMultipoint	pos	TG 48:3	Level2	16.7	TG 48:2	Level2	16.9	NA	NA	NA	NA	NA	NA	NA	NA	NA	NA	NA	NA	NA	NA	NA	NA	NA	NA	NA	NA	NA	NA	NA	NA	NA	NA	NA	NA	NA	NA	NA	NA	NA	NA	NA	NA	NA	NA	NA
TG 46:3	Analyte	16.4	RPMultipoint	pos	TG 48:3	Level2	16.7	TG 48:3	Level2	16.7	NA	NA	NA	NA	NA	NA	NA	NA	NA	NA	NA	NA	NA	NA	NA	NA	NA	NA	NA	NA	NA	NA	NA	NA	NA	NA	NA	NA	NA	NA	NA	NA	NA	NA	NA	NA	NA	NA	NA
TG 46:4	Analyte	16.1	RPFIAOnepoint	pos	TG 54:6	Level2	16.8	TG 50:5	Level2	16.5	NA	NA	NA	NA	NA	NA	NA	NA	NA	NA	46.0981	NA	NA	NA	NA	NA	NA	NA	NA	NA	NA	NA	NA	NA	NA	NA	NA	NA	NA	NA	NA	NA	NA	NA	NA	NA	NA	NA	NA
TG 47:0	Analyte	17.2	RPFIAOnepoint	pos	TG 48:3	Level2	16.7	TG 50:3	Level2	16.9	NA	NA	NA	NA	NA	NA	381.075	NA	NA	NA	NA	NA	NA	NA	NA	NA	NA	NA	NA	NA	NA	NA	NA	NA	NA	NA	564.324	NA	NA	NA	NA	NA	NA	NA	NA	NA	NA	NA	NA
TG 47:1	Analyte	17	RPMultipoint	pos	TG 48:3	Level2	16.7	TG 48:2	Level2	16.9	NA	NA	NA	NA	NA	NA	NA	NA	NA	NA	NA	NA	NA	NA	NA	NA	NA	NA	NA	NA	NA	NA	NA	NA	NA	NA	NA	NA	NA	NA	NA	NA	NA	NA	NA	NA	NA	NA	NA
TG 47:2	Analyte	16.8	RPMultipoint	pos	TG 48:3	Level2	16.7	TG 48:2	Level2	16.9	NA	NA	NA	NA	NA	NA	NA	NA	NA	NA	NA	NA	NA	NA	NA	NA	NA	NA	NA	NA	NA	NA	NA	NA	NA	NA	NA	NA	NA	NA	NA	NA	NA	NA	NA	NA	NA	NA	NA
TG 47:3	Analyte	16.6	RPMultipoint	pos	TG 48:3	Level2	16.7	TG 48:3	Level2	16.7	NA	NA	NA	NA	NA	NA	NA	NA	NA	NA	NA	NA	NA	NA	NA	NA	NA	NA	NA	NA	NA	NA	NA	NA	NA	NA	NA	NA	NA	NA	NA	NA	NA	NA	NA	NA	NA	NA	NA
TG 47:5	Analyte	16.4	RPMultipoint	pos	TG 54:9	Level2	16.1	TG 48:5	Level2	16.2	NA	NA	NA	NA	NA	NA	NA	NA	NA	NA	NA	NA	NA	NA	NA	NA	NA	NA	NA	NA	NA	NA	NA	NA	NA	NA	NA	NA	NA	NA	NA	NA	NA	NA	NA	NA	NA	NA	NA
TG 47:6	Analyte	16.1	RPFIAOnepoint	pos	TG 54:6	Level2	16.8	TG 50:5	Level2	16.5	NA	NA	NA	NA	NA	NA	NA	NA	NA	NA	NA	NA	NA	NA	NA	NA	NA	NA	NA	NA	NA	NA	NA	NA	NA	NA	NA	NA	NA	NA	NA	NA	NA	NA	NA	NA	NA	NA	NA
TG 48:0	ESTD	17.3	RPFIAOnepoint	pos	TG 48:3	Level2	16.7	TG 50:3	Level2	16.9	NA	NA	NA	NA	NA	NA	NA	NA	NA	NA	NA	NA	NA	NA	NA	NA	NA	NA	NA	NA	NA	NA	NA	NA	NA	NA	60015.8	NA	NA	NA	NA	NA	NA	NA	NA	NA	NA	NA	NA
TG 48:1	Analyte	17.1	RPFIAOnepoint	pos	TG 48:3	Level2	16.7	TG 50:3	Level2	16.9	NA	NA	NA	NA	NA	NA	NA	NA	NA	NA	NA	NA	NA	NA	1545.19	NA	NA	NA	NA	NA	NA	NA	NA	NA	338.203	NA	NA	NA	NA	NA	NA	NA	NA	NA	NA	NA	NA	NA	NA
TG 48:1	DeutISTD	17.1	RPFIAOnepoint	pos	TG 48:3	Level2	16.7	TG 50:3	Level2	16.9	NA	568.681	551.255	NA	NA	NA	25.0393	320.423	NA	NA	325.43	NA	NA	NA	NA	NA	NA	NA	NA	NA	NA	NA	NA	NA	NA	103.043	37.449	151.142	NA	NA	NA	NA	NA	NA	NA	NA	NA	NA	NA
TG 48:2	Analyte	16.9	RPFIAOnepoint	pos	TG 48:3	Level2	16.7	TG 50:3	Level2	16.9	NA	NA	NA	NA	NA	NA	1191.8	NA	NA	NA	NA	NA	NA	NA	1912.47	NA	NA	NA	NA	NA	NA	NA	NA	NA	NA	NA	NA	NA	NA	NA	NA	NA	NA	NA	NA	NA	NA	NA	NA
TG 48:3	ESTD	16.7	RPMultipoint	pos	TG 48:3	Level1	16.7	TG 48:3	Level1	16.7	NA	NA	NA	NA	NA	NA	NA	NA	NA	NA	NA	NA	NA	NA	NA	NA	NA	NA	NA	NA	NA	NA	NA	NA	NA	NA	NA	NA	NA	NA	NA	NA	NA	NA	NA	NA	NA	NA	NA
TG 48:4	Analyte	16.4	RPMultipoint	pos	TG 48:3	Level2	16.7	TG 48:4	Level1	16.4	NA	NA	NA	NA	NA	NA	NA	NA	NA	NA	NA	NA	NA	NA	NA	NA	NA	NA	NA	NA	NA	NA	NA	NA	NA	NA	NA	NA	NA	NA	NA	NA	NA	NA	NA	NA	NA	NA	NA
TG 48:5	Analyte	16.2	RPFIAOnepoint	pos	TG 54:6	Level2	16.8	TG 50:5	Level2	16.5	NA	NA	NA	NA	NA	NA	26.0411	NA	NA	NA	NA	NA	NA	NA	151.689	NA	NA	NA	NA	NA	NA	NA	NA	NA	117.539	NA	NA	NA	NA	NA	NA	NA	NA	NA	NA	NA	NA	NA	NA
TG 49:0	Analyte	17.4	RPFIAOnepoint	pos	TG 54:3	Level2	17.3	TG 52:2	Level2	17.3	NA	NA	NA	NA	NA	NA	NA	NA	NA	NA	NA	NA	NA	NA	NA	NA	NA	NA	NA	NA	NA	NA	NA	NA	NA	NA	202.549	NA	NA	NA	NA	NA	NA	NA	NA	NA	NA	NA	NA
TG 49:1	Analyte	17.2	RPFIAOnepoint	pos	TG 48:3	Level2	16.7	TG 50:3	Level2	16.9	NA	NA	NA	NA	NA	NA	1220.39	NA	NA	NA	NA	NA	NA	NA	1776.1	NA	NA	NA	NA	NA	NA	NA	NA	NA	602.898	894.833	674.967	622.374	163.49	NA	NA	NA	NA	NA	NA	NA	NA	NA	NA
TG 49:2	Analyte	17	RPFIAOnepoint	pos	TG 48:3	Level2	16.7	TG 50:3	Level2	16.9	NA	NA	NA	NA	NA	NA	NA	NA	NA	NA	NA	NA	NA	NA	NA	NA	NA	NA	NA	NA	NA	NA	NA	NA	NA	NA	NA	NA	NA	NA	NA	NA	NA	NA	NA	NA	NA	NA	NA
TG 49:3	Analyte	16.8	RPMultipoint	pos	TG 48:3	Level2	16.7	TG 49:3	Level1	16.8	NA	NA	NA	NA	NA	NA	NA	NA	NA	NA	NA	NA	NA	NA	NA	NA	NA	NA	NA	NA	NA	NA	NA	NA	NA	NA	NA	NA	NA	NA	NA	NA	NA	NA	NA	NA	NA	NA	NA
TG 50:0	Analyte	17.5	RPFIAOnepoint	pos	TG 54:3	Level2	17.3	TG 52:2	Level2	17.3	NA	NA	NA	NA	NA	NA	NA	NA	NA	NA	NA	NA	NA	NA	NA	NA	NA	NA	NA	NA	NA	NA	NA	NA	NA	NA	NA	NA	NA	NA	NA	NA	NA	NA	NA	NA	NA	NA	NA
TG 50:1	Analyte	17.3	RPFIAOnepoint	pos	TG 54:3	Level2	17.3	TG 52:3	Level2	17.1	NA	NA	NA	NA	NA	NA	NA	NA	NA	NA	NA	NA	NA	NA	NA	NA	NA	NA	NA	NA	NA	NA	NA	NA	NA	NA	NA	NA	NA	NA	NA	NA	NA	NA	NA	NA	NA	NA	NA
TG 50:2	Analyte	17.1	RPFIAOnepoint	pos	TG 54:3	Level2	17.3	TG 52:3	Level2	17.1	NA	NA	NA	NA	NA	NA	2518.05	NA	NA	NA	NA	NA	NA	NA	4013.39	NA	NA	NA	NA	NA	NA	NA	NA	NA	2958.09	NA	NA	NA	NA	NA	NA	NA	NA	NA	NA	NA	NA	NA	NA
TG 50:3	Analyte	16.9	RPFIAOnepoint	pos	TG 48:3	Level2	16.7	TG 50:3	Level1	16.9	NA	NA	NA	NA	NA	NA	3836.54	1622.72	NA	464.961	NA	NA	NA	239.101	19387.5	NA	NA	NA	NA	NA	NA	NA	NA	NA	8228.86	731.202	632.916	880.001	1048.63	335.895	NA	NA	NA	NA	NA	NA	NA	NA	NA
TG 50:4	Analyte	16.7	RPMultipoint	pos	TG 48:3	Level2	16.7	TG 50:4	Level1	16.7	NA	NA	NA	NA	NA	NA	NA	NA	NA	NA	NA	NA	NA	NA	NA	NA	NA	NA	NA	NA	NA	NA	NA	NA	NA	NA	NA	NA	NA	NA	NA	NA	NA	NA	NA	NA	NA	NA	NA
TG 50:5	Analyte	16.5	RPMultipoint	pos	TG 54:6	Level2	16.8	TG 50:5	Level1	16.5	NA	NA	NA	NA	NA	NA	NA	NA	NA	NA	NA	NA	NA	NA	NA	NA	NA	NA	NA	NA	NA	NA	NA	NA	NA	NA	NA	NA	NA	NA	NA	NA	NA	NA	NA	NA	NA	NA	NA
TG 51:0	Analyte	17.6	RPFIAOnepoint	pos	TG 54:3	Level2	17.3	TG 52:2	Level2	17.3	NA	NA	NA	NA	NA	NA	NA	NA	NA	NA	NA	NA	NA	NA	NA	NA	NA	NA	NA	NA	NA	NA	NA	NA	NA	NA	NA	NA	NA	NA	NA	NA	NA	NA	NA	NA	NA	NA	NA
TG 51:1	Analyte	17.4	RPFIAOnepoint	pos	TG 54:3	Level2	17.3	TG 52:2	Level2	17.3	NA	NA	NA	NA	NA	NA	86.0357	NA	NA	NA	NA	NA	NA	NA	NA	NA	NA	NA	NA	NA	NA	NA	NA	NA	NA	NA	177.885	NA	NA	NA	NA	NA	NA	NA	NA	NA	NA	NA	NA
TG 51:2	Analyte	17.2	RPFIAOnepoint	pos	TG 54:3	Level2	17.3	TG 52:2	Level2	17.3	NA	NA	NA	NA	NA	NA	1066.63	NA	NA	NA	NA	NA	NA	NA	1613.96	NA	NA	NA	NA	NA	NA	NA	NA	NA	1162.41	NA	217.651	NA	NA	NA	NA	NA	NA	NA	NA	NA	NA	NA	NA
TG 51:3	Analyte	17	RPMultipoint	pos	TG 48:3	Level2	16.7	TG 51:3	Level1	17	NA	NA	NA	NA	NA	NA	NA	NA	NA	NA	NA	NA	NA	NA	NA	NA	NA	NA	NA	NA	NA	NA	NA	NA	NA	NA	NA	NA	NA	NA	NA	NA	NA	NA	NA	NA	NA	NA	NA
TG 51:4	Analyte	16.8	RPFIAOnepoint	pos	TG 54:6	Level2	16.8	TG 51:5	Level2	16.6	NA	NA	NA	NA	NA	NA	1069.02	NA	NA	NA	NA	NA	NA	NA	4390.77	NA	NA	NA	NA	NA	NA	NA	NA	NA	2404.86	148.062	NA	NA	NA	NA	NA	NA	NA	NA	NA	NA	NA	NA	NA
TG 51:5	Analyte	16.6	RPFIAOnepoint	pos	TG 54:6	Level2	16.8	TG 51:5	Level1	16.6	NA	NA	NA	NA	NA	NA	394.118	NA	NA	NA	NA	NA	NA	NA	2188.36	NA	NA	NA	NA	NA	NA	NA	NA	NA	897.033	NA	NA	NA	NA	NA	NA	NA	NA	NA	NA	NA	NA	NA	NA
TG 52:0	Analyte	17.7	RPMultipoint	pos	TG 54:0	Level2	18	TG 52:1	Level2	17.5	NA	NA	NA	NA	NA	NA	NA	NA	NA	NA	NA	NA	NA	NA	NA	NA	NA	NA	NA	NA	NA	NA	NA	NA	NA	NA	NA	NA	NA	NA	NA	NA	NA	NA	NA	NA	NA	NA	NA
TG 52:1	Analyte	17.5	RPMultipoint	pos	TG 54:0	Level2	18	TG 52:1	Level1	17.5	NA	NA	NA	NA	NA	NA	NA	NA	NA	NA	NA	NA	NA	NA	NA	NA	NA	NA	NA	NA	NA	NA	NA	NA	NA	NA	NA	NA	NA	NA	NA	NA	NA	NA	NA	NA	NA	NA	NA
TG 52:2	Analyte	17.3	RPFIAOnepoint	pos	TG 54:3	Level2	17.3	TG 52:2	Level1	17.3	NA	NA	NA	NA	NA	NA	1982.82	NA	NA	NA	NA	NA	NA	NA	4032.67	NA	NA	NA	NA	NA	NA	NA	NA	NA	1027.6	NA	NA	NA	NA	NA	NA	NA	NA	NA	NA	NA	NA	NA	NA
TG 52:3	Analyte	17.1	RPFIAOnepoint	pos	TG 54:3	Level2	17.3	TG 52:3	Level1	17.1	NA	NA	NA	NA	NA	NA	13857	NA	NA	NA	NA	NA	NA	NA	64613.1	NA	NA	NA	NA	NA	NA	NA	NA	NA	29365.6	NA	NA	NA	NA	NA	NA	NA	NA	NA	NA	NA	NA	NA	NA
TG 52:4	Analyte	16.9	RPFIAOnepoint	pos	TG 54:3	Level2	17.3	TG 52:4	Level1	16.9	NA	NA	NA	NA	NA	NA	15177.2	NA	NA	NA	NA	NA	NA	NA	70694.5	NA	NA	NA	NA	NA	NA	NA	NA	NA	35437.3	NA	NA	NA	NA	NA	NA	NA	NA	NA	NA	NA	NA	NA	NA
TG 52:5	Analyte	16.8	RPFIAOnepoint	pos	TG 54:6	Level2	16.8	TG 52:5	Level1	16.7	NA	NA	NA	NA	NA	NA	11124.5	NA	NA	NA	NA	NA	NA	NA	51913	NA	NA	NA	NA	NA	NA	NA	NA	NA	27737.6	NA	NA	NA	NA	NA	NA	NA	NA	NA	NA	NA	NA	NA	NA
TG 52:6	Analyte	16.6	RPMultipoint	pos	TG 54:6	Level2	16.8	TG 52:6	Level1	16.5	NA	NA	NA	NA	NA	NA	NA	NA	NA	NA	NA	NA	NA	NA	NA	NA	NA	NA	NA	NA	NA	NA	NA	NA	NA	NA	NA	NA	NA	NA	NA	NA	NA	NA	NA	NA	NA	NA	NA
TG 52:7	Analyte	16.4	RPFIAOnepoint	pos	TG 54:6	Level2	16.8	TG 52:7	Level1	16.2	NA	NA	NA	NA	NA	NA	1149.83	NA	NA	NA	NA	NA	NA	NA	5129.26	NA	NA	NA	NA	NA	NA	NA	NA	NA	3758.36	NA	NA	NA	NA	NA	NA	NA	NA	NA	NA	NA	NA	NA	NA
TG 52:8	Analyte	16.2	RPMultipoint	pos	TG 54:9	Level2	16.1	TG 52:7	Level2	16.2	NA	NA	NA	NA	NA	NA	NA	NA	NA	NA	NA	NA	NA	NA	NA	NA	NA	NA	NA	NA	NA	NA	NA	NA	NA	NA	NA	NA	NA	NA	NA	NA	NA	NA	NA	NA	NA	NA	NA
TG 53:0	Analyte	17.9	RPFIAOnepoint	pos	TG 54:3	Level2	17.3	TG 54:2	Level2	17.5	NA	NA	NA	NA	NA	NA	NA	NA	NA	NA	NA	NA	NA	NA	NA	NA	NA	NA	NA	NA	NA	NA	NA	NA	NA	NA	38.4491	NA	NA	NA	NA	NA	NA	NA	NA	NA	NA	NA	NA
TG 53:1	Analyte	17.6	RPFIAOnepoint	pos	TG 54:3	Level2	17.3	TG 53:3	Level2	17.2	NA	NA	NA	NA	NA	NA	NA	NA	NA	NA	NA	NA	NA	NA	NA	NA	NA	NA	NA	NA	NA	NA	NA	NA	NA	NA	43.4108	NA	NA	NA	NA	NA	NA	NA	NA	NA	NA	NA	NA
TG 53:2	Analyte	17.4	RPFIAOnepoint	pos	TG 54:3	Level2	17.3	TG 53:3	Level2	17.2	NA	NA	NA	NA	NA	NA	688.573	372.682	86.4736	46.3626	164.302	NA	NA	59.3855	1853.29	NA	NA	NA	NA	NA	NA	NA	NA	NA	2022.05	120.255	190.404	695.938	988.115	129	NA	NA	NA	NA	NA	NA	NA	NA	NA
TG 53:3	Analyte	17.2	RPMultipoint	pos	TG 54:3	Level2	17.3	TG 53:3	Level1	17.2	NA	NA	NA	NA	NA	NA	NA	NA	NA	NA	NA	NA	NA	NA	NA	NA	NA	NA	NA	NA	NA	NA	NA	NA	NA	NA	NA	NA	NA	NA	NA	NA	NA	NA	NA	NA	NA	NA	NA
TG 53:4	Analyte	17	RPFIAOnepoint	pos	TG 54:3	Level2	17.3	TG 53:4	Level1	17	NA	NA	NA	NA	NA	NA	7850.34	NA	NA	NA	NA	NA	NA	NA	13453.1	NA	NA	NA	NA	NA	NA	NA	NA	NA	6048.7	NA	NA	54.4143	NA	NA	NA	NA	NA	NA	NA	NA	NA	NA	NA
TG 53:5	Analyte	16.8	RPMultipoint	pos	TG 54:6	Level2	16.8	TG 53:5	Level1	16.8	NA	NA	NA	NA	NA	NA	NA	NA	NA	NA	NA	NA	NA	NA	NA	NA	NA	NA	NA	NA	NA	NA	NA	NA	NA	NA	NA	NA	NA	NA	NA	NA	NA	NA	NA	NA	NA	NA	NA
TG 53:6	Analyte	16.7	RPMultipoint	pos	TG 54:6	Level2	16.8	TG 53:6	Level1	16.6	NA	NA	NA	NA	NA	NA	NA	NA	NA	NA	NA	NA	NA	NA	NA	NA	NA	NA	NA	NA	NA	NA	NA	NA	NA	NA	NA	NA	NA	NA	NA	NA	NA	NA	NA	NA	NA	NA	NA
TG 53:7	Analyte	16.4	RPFIAOnepoint	pos	TG 54:6	Level2	16.8	TG 53:7	Level1	16.4	NA	NA	NA	NA	NA	NA	2333.19	NA	NA	NA	NA	NA	NA	NA	3812.13	NA	NA	NA	NA	NA	NA	NA	NA	NA	2418.22	NA	NA	NA	NA	NA	NA	NA	NA	NA	NA	NA	NA	NA	NA
TG 53:8	Analyte	16.2	RPMultipoint	pos	TG 54:9	Level2	16.1	TG 53:8	Level1	16.1	NA	NA	NA	NA	NA	NA	NA	NA	NA	NA	NA	NA	NA	NA	NA	NA	NA	NA	NA	NA	NA	NA	NA	NA	NA	NA	NA	NA	NA	NA	NA	NA	NA	NA	NA	NA	NA	NA	NA
TG 54:0	ESTD	18	RPMultipoint	pos	TG 54:0	Level1	18	TG 54:1	Level2	17.7	NA	NA	NA	NA	NA	NA	NA	NA	NA	NA	NA	NA	NA	NA	NA	NA	NA	NA	NA	NA	NA	NA	NA	NA	NA	NA	NA	NA	NA	NA	NA	NA	NA	NA	NA	NA	NA	NA	NA
TG 54:1	Analyte	17.7	RPMultipoint	pos	TG 54:0	Level2	18	TG 54:1	Level1	17.7	NA	NA	NA	NA	NA	NA	NA	NA	NA	NA	NA	NA	NA	NA	NA	NA	NA	NA	NA	NA	NA	NA	NA	NA	NA	NA	NA	NA	NA	NA	NA	NA	NA	NA	NA	NA	NA	NA	NA
TG 54:2	Analyte	17.5	RPFIAOnepoint	pos	TG 54:3	Level2	17.3	TG 54:2	Level1	17.5	NA	NA	NA	NA	NA	NA	3095.11	NA	NA	NA	NA	NA	NA	NA	8554.87	NA	NA	NA	NA	NA	NA	NA	NA	NA	7365.74	NA	NA	NA	NA	NA	NA	NA	NA	NA	NA	NA	NA	NA	NA
TG 54:3	ESTD	17.3	RPFIAOnepoint	pos	TG 54:3	Level1	17.3	TG 54:3	Level1	17.3	NA	NA	NA	NA	NA	NA	55032.6	NA	NA	NA	NA	NA	NA	NA	79847.2	NA	NA	NA	NA	NA	NA	NA	NA	NA	36750	NA	10669.3	NA	NA	NA	NA	NA	NA	NA	NA	NA	NA	NA	NA
TG 54:4	Analyte	17.1	RPFIAOnepoint	pos	TG 54:3	Level2	17.3	TG 54:4	Level1	17.1	NA	NA	NA	NA	NA	NA	88219.9	NA	NA	NA	NA	NA	NA	NA	132029	NA	NA	NA	NA	NA	NA	NA	NA	NA	58830.7	NA	NA	NA	NA	NA	NA	NA	NA	NA	NA	NA	NA	NA	NA
TG 54:5	Analyte	16.9	RPFIAOnepoint	pos	TG 54:6	Level2	16.8	TG 54:5	Level1	17	1.30564	NA	NA	NA	NA	NA	80669.1	NA	NA	NA	NA	NA	NA	NA	115132	NA	NA	NA	NA	NA	NA	NA	NA	NA	53904.3	NA	NA	NA	NA	NA	NA	NA	NA	NA	NA	NA	NA	NA	NA
TG 54:6	ESTD	16.8	RPFIAOnepoint	pos	TG 54:6	Level1	16.8	TG 54:6	Level1	16.8	1.25785	NA	NA	NA	NA	NA	53669.8	NA	NA	NA	NA	NA	NA	NA	73879.9	NA	NA	NA	NA	NA	NA	NA	NA	NA	36453.9	NA	NA	NA	NA	NA	NA	NA	NA	NA	NA	NA	NA	NA	NA
TG 54:7	Analyte	16.6	RPMultipoint	pos	TG 54:6	Level2	16.8	TG 54:7	Level1	16.5	NA	NA	NA	NA	NA	NA	NA	NA	NA	NA	NA	NA	NA	NA	NA	NA	NA	NA	NA	NA	NA	NA	NA	NA	NA	NA	NA	NA	NA	NA	NA	NA	NA	NA	NA	NA	NA	NA	NA
TG 54:8	Analyte	16.4	RPMultipoint	pos	TG 54:9	Level2	16.1	TG 54:8	Level1	16.3	NA	NA	NA	NA	NA	NA	NA	NA	NA	NA	NA	NA	NA	NA	NA	NA	NA	NA	NA	NA	NA	NA	NA	NA	NA	NA	NA	NA	NA	NA	NA	NA	NA	NA	NA	NA	NA	NA	NA
TG 54:9	ESTD	16.1	RPMultipoint	pos	TG 54:9	Level1	16.1	TG 54:9	Level1	16	NA	NA	NA	NA	NA	NA	NA	NA	NA	NA	NA	NA	NA	NA	NA	NA	NA	NA	NA	NA	NA	NA	NA	NA	NA	NA	NA	NA	NA	NA	NA	NA	NA	NA	NA	NA	NA	NA	NA
TG 55:3	Analyte	17.4	RPFIAOnepoint	pos	TG 54:3	Level2	17.3	TG 54:3	Level2	17.3	NA	NA	NA	NA	NA	NA	1086.77	NA	NA	NA	114.57	NA	NA	NA	998.896	NA	NA	NA	NA	NA	NA	NA	NA	NA	727.781	33.1528	153.504	249.084	21.6776	NA	NA	NA	NA	NA	NA	NA	NA	NA	NA
TG 55:4	Analyte	17.2	RPMultipoint	pos	TG 54:3	Level2	17.3	TG 54:4	Level2	17.1	NA	NA	NA	NA	NA	NA	NA	NA	NA	NA	NA	NA	NA	NA	NA	NA	NA	NA	NA	NA	NA	NA	NA	NA	NA	NA	NA	NA	NA	NA	NA	NA	NA	NA	NA	NA	NA	NA	NA
TG 55:5	Analyte	17.1	RPMultipoint	pos	TG 54:6	Level2	16.8	TG 54:5	Level2	17	NA	NA	NA	NA	NA	NA	NA	NA	NA	NA	NA	NA	NA	NA	NA	NA	NA	NA	NA	NA	NA	NA	NA	NA	NA	NA	NA	NA	NA	NA	NA	NA	NA	NA	NA	NA	NA	NA	NA
TG 55:6	Analyte	17	RPMultipoint	pos	TG 54:6	Level2	16.8	TG 54:6	Level2	16.8	NA	NA	NA	NA	NA	NA	NA	NA	NA	NA	NA	NA	NA	NA	NA	NA	NA	NA	NA	NA	NA	NA	NA	NA	NA	NA	NA	NA	NA	NA	NA	NA	NA	NA	NA	NA	NA	NA	NA
TG 56:1	Analyte	17.9	RPFIAOnepoint	pos	TG 54:3	Level2	17.3	TG 54:2	Level2	17.5	NA	NA	NA	NA	NA	NA	NA	NA	NA	NA	NA	NA	NA	NA	NA	NA	NA	NA	NA	NA	NA	NA	NA	NA	NA	NA	NA	NA	NA	NA	NA	NA	NA	NA	NA	NA	NA	NA	NA
TG 56:10	Analyte	16.2	RPFIAOnepoint	pos	TG 54:9	Level2	16.1	TG 54:9	Level2	16	NA	NA	NA	NA	NA	NA	NA	NA	NA	NA	NA	NA	NA	NA	NA	NA	NA	NA	NA	NA	NA	NA	NA	NA	NA	NA	NA	NA	NA	NA	NA	NA	NA	NA	NA	NA	NA	NA	NA
TG 56:2	Analyte	17.7	RPFIAOnepoint	pos	TG 54:3	Level2	17.3	TG 54:2	Level2	17.5	NA	NA	NA	NA	NA	NA	NA	NA	NA	NA	NA	NA	NA	NA	476.664	NA	NA	NA	NA	NA	NA	NA	NA	NA	NA	4.16936	NA	NA	NA	NA	NA	NA	NA	NA	NA	NA	NA	NA	NA
TG 56:3	Analyte	17.5	RPFIAOnepoint	pos	TG 54:3	Level2	17.3	TG 54:3	Level2	17.3	NA	NA	NA	NA	NA	NA	NA	NA	NA	NA	NA	NA	NA	NA	NA	NA	NA	NA	NA	NA	NA	NA	NA	NA	NA	NA	NA	NA	NA	NA	NA	NA	NA	NA	NA	NA	NA	NA	NA
TG 56:4	Analyte	17.3	RPFIAOnepoint	pos	TG 54:3	Level2	17.3	TG 54:4	Level2	17.1	NA	NA	NA	NA	NA	NA	1331.34	NA	NA	NA	NA	NA	NA	NA	1462.59	NA	NA	NA	NA	NA	NA	NA	NA	NA	841.731	NA	NA	134.925	NA	NA	NA	NA	NA	NA	NA	NA	NA	NA	NA
TG 56:5	Analyte	17.2	RPFIAOnepoint	pos	TG 54:6	Level2	16.8	TG 54:5	Level2	17	NA	NA	NA	NA	NA	NA	613.606	NA	NA	NA	NA	NA	NA	NA	567.976	NA	NA	NA	NA	NA	NA	NA	NA	NA	383.776	NA	NA	NA	NA	NA	NA	NA	NA	NA	NA	NA	NA	NA	NA
TG 56:6	Analyte	17	RPMultipoint	pos	TG 54:6	Level2	16.8	TG 56:6	Level1	17	NA	NA	NA	NA	NA	NA	NA	NA	NA	NA	NA	NA	NA	NA	NA	NA	NA	NA	NA	NA	NA	NA	NA	NA	NA	NA	NA	NA	NA	NA	NA	NA	NA	NA	NA	NA	NA	NA	NA
TG 56:7	Analyte	16.9	RPFIAOnepoint	pos	TG 54:6	Level2	16.8	TG 54:7	Level2	16.5	NA	NA	NA	NA	NA	NA	NA	NA	NA	NA	NA	NA	NA	NA	114.944	NA	NA	NA	NA	NA	NA	NA	NA	NA	NA	NA	NA	NA	NA	NA	NA	NA	NA	NA	NA	NA	NA	NA	NA
TG 56:8	Analyte	16.7	RPMultipoint	pos	TG 54:6	Level2	16.8	TG 56:7	Level2	16.9	NA	NA	NA	NA	NA	NA	NA	NA	NA	NA	NA	NA	NA	NA	NA	NA	NA	NA	NA	NA	NA	NA	NA	NA	NA	NA	NA	NA	NA	NA	NA	NA	NA	NA	NA	NA	NA	NA	NA
TG 56:9	Analyte	16.5	RPMultipoint	pos	TG 54:9	Level2	16.1	TG 56:9	Level1	16.5	NA	NA	NA	NA	NA	NA	NA	NA	NA	NA	NA	NA	NA	NA	NA	NA	NA	NA	NA	NA	NA	NA	NA	NA	NA	NA	NA	NA	NA	NA	NA	NA	NA	NA	NA	NA	NA	NA	NA
TG 58:1	Analyte	18.2	RPMultipoint	pos	TG 60:3	Level2	17.9	TG 58:2	Level2	17.9	NA	NA	NA	NA	NA	NA	NA	NA	NA	NA	NA	NA	NA	NA	NA	NA	NA	NA	NA	NA	NA	NA	NA	NA	NA	NA	NA	NA	NA	NA	NA	NA	NA	NA	NA	NA	NA	NA	NA
TG 58:10	Analyte	16.6	RPFIAOnepoint	pos	TG 54:9	Level2	16.1	TG 54:8	Level2	16.3	NA	NA	NA	NA	NA	NA	NA	NA	NA	NA	NA	NA	NA	NA	NA	NA	NA	NA	NA	NA	NA	NA	NA	NA	NA	NA	NA	NA	NA	NA	NA	NA	NA	NA	NA	NA	NA	NA	NA
TG 58:11	Analyte	16.3	RPFIAOnepoint	pos	TG 54:9	Level2	16.1	TG 54:9	Level2	16	NA	NA	NA	NA	NA	NA	NA	NA	NA	NA	NA	NA	NA	NA	NA	NA	NA	NA	NA	NA	NA	NA	NA	NA	NA	NA	NA	NA	NA	NA	NA	NA	NA	NA	NA	NA	NA	NA	NA
TG 58:2	Analyte	17.9	RPMultipoint	pos	TG 60:3	Level2	17.9	TG 58:2	Level1	17.9	NA	NA	NA	NA	NA	NA	NA	NA	NA	NA	NA	NA	NA	NA	NA	NA	NA	NA	NA	NA	NA	NA	NA	NA	NA	NA	NA	NA	NA	NA	NA	NA	NA	NA	NA	NA	NA	NA	NA
TG 58:3	Analyte	17.7	RPFIAOnepoint	pos	TG 54:3	Level2	17.3	TG 54:3	Level2	17.3	NA	NA	NA	NA	NA	NA	304.737	NA	NA	NA	NA	NA	NA	NA	375.276	NA	NA	NA	NA	NA	NA	NA	NA	NA	242.512	NA	7.74921	NA	NA	NA	NA	NA	NA	NA	NA	NA	NA	NA	NA
TG 58:4	Analyte	17.5	RPMultipoint	pos	TG 60:3	Level2	17.9	TG 58:4	Level1	17.6	NA	NA	NA	NA	NA	NA	NA	NA	NA	NA	NA	NA	NA	NA	NA	NA	NA	NA	NA	NA	NA	NA	NA	NA	NA	NA	NA	NA	NA	NA	NA	NA	NA	NA	NA	NA	NA	NA	NA
TG 58:5	Analyte	17.4	RPFIAOnepoint	pos	TG 54:6	Level2	16.8	TG 54:5	Level2	17	NA	NA	NA	NA	NA	NA	61.5574	NA	NA	NA	NA	NA	NA	NA	NA	NA	NA	NA	NA	NA	NA	NA	NA	NA	NA	NA	NA	NA	NA	NA	NA	NA	NA	NA	NA	NA	NA	NA	NA
TG 58:6	Analyte	17.2	RPFIAOnepoint	pos	TG 54:6	Level2	16.8	TG 54:6	Level2	16.8	NA	NA	NA	NA	NA	NA	NA	NA	NA	NA	NA	NA	NA	NA	NA	NA	NA	NA	NA	NA	NA	NA	NA	NA	NA	NA	NA	NA	NA	NA	NA	NA	NA	NA	NA	NA	NA	NA	NA
TG 58:7	Analyte	17	RPFIAOnepoint	pos	TG 54:6	Level2	16.8	TG 54:6	Level2	16.8	NA	NA	NA	NA	NA	NA	NA	NA	NA	NA	NA	NA	NA	NA	NA	NA	NA	NA	NA	NA	NA	NA	NA	NA	NA	NA	NA	NA	NA	NA	NA	NA	NA	NA	NA	NA	NA	NA	NA
TG 58:8	Analyte	17	RPMultipoint	pos	TG 54:6	Level2	16.8	TG 56:7	Level2	16.9	NA	NA	NA	NA	NA	NA	NA	NA	NA	NA	NA	NA	NA	NA	NA	NA	NA	NA	NA	NA	NA	NA	NA	NA	NA	NA	NA	NA	NA	NA	NA	NA	NA	NA	NA	NA	NA	NA	NA
TG 58:9	Analyte	16.8	RPFIAOnepoint	pos	TG 54:9	Level2	16.1	TG 54:8	Level2	16.3	NA	NA	NA	NA	NA	NA	NA	NA	NA	NA	NA	NA	NA	NA	NA	NA	NA	NA	NA	NA	NA	NA	NA	NA	NA	NA	NA	NA	NA	NA	NA	NA	NA	NA	NA	NA	NA	NA	NA
TG 60:1	Analyte	18.4	RPFIAOnepoint	pos	TG 54:3	Level2	17.3	TG 54:2	Level3	17.5	NA	NA	NA	NA	NA	NA	NA	NA	NA	NA	NA	NA	NA	NA	NA	NA	NA	NA	NA	NA	NA	NA	NA	NA	NA	NA	NA	NA	NA	NA	NA	NA	NA	NA	NA	NA	NA	NA	NA
TG 60:10	Analyte	16.8	RPFIAOnepoint	pos	TG 54:6	Level2	16.8	TG 54:7	Level2	16.5	NA	NA	NA	NA	NA	NA	NA	NA	NA	NA	NA	NA	NA	NA	NA	NA	NA	NA	NA	NA	NA	NA	NA	NA	NA	NA	NA	NA	NA	NA	NA	NA	NA	NA	NA	NA	NA	NA	NA
TG 60:11	Analyte	16.7	RPFIAOnepoint	pos	TG 54:9	Level2	16.1	TG 54:8	Level2	16.3	NA	NA	NA	NA	NA	NA	NA	NA	54.3781	NA	NA	NA	NA	NA	NA	NA	NA	NA	NA	NA	NA	NA	NA	NA	NA	NA	NA	NA	NA	NA	NA	NA	NA	NA	NA	NA	NA	NA	NA
TG 60:12	Analyte	16.4	RPFIAOnepoint	pos	TG 54:9	Level2	16.1	TG 54:9	Level2	16	NA	NA	NA	NA	NA	NA	109.915	NA	NA	NA	NA	NA	NA	NA	233.953	NA	NA	NA	NA	NA	NA	NA	NA	NA	NA	NA	NA	NA	NA	NA	NA	NA	NA	NA	NA	NA	NA	NA	NA
TG 60:2	Analyte	18.2	RPMultipoint	pos	TG 60:3	Level2	17.9	TG 60:2	Level1	18.2	NA	NA	NA	NA	NA	NA	NA	NA	NA	NA	NA	NA	NA	NA	NA	NA	NA	NA	NA	NA	NA	NA	NA	NA	NA	NA	NA	NA	NA	NA	NA	NA	NA	NA	NA	NA	NA	NA	NA
TG 60:3	ESTD	17.9	RPMultipoint	pos	TG 60:3	Level1	17.9	TG 60:3	Level1	18	NA	NA	NA	NA	NA	NA	NA	NA	NA	NA	NA	NA	NA	NA	NA	NA	NA	NA	NA	NA	NA	NA	NA	NA	NA	NA	NA	NA	NA	NA	NA	NA	NA	NA	NA	NA	NA	NA	NA
TG 60:4	Analyte	17.7	RPMultipoint	pos	TG 60:3	Level2	17.9	TG 60:3	Level2	18	NA	NA	NA	NA	NA	NA	NA	NA	NA	NA	NA	NA	NA	NA	NA	NA	NA	NA	NA	NA	NA	NA	NA	NA	NA	NA	NA	NA	NA	NA	NA	NA	NA	NA	NA	NA	NA	NA	NA
TG 60:5	Analyte	17.5	RPFIAOnepoint	pos	TG 54:3	Level2	17.3	TG 54:3	Level2	17.3	NA	NA	NA	NA	NA	NA	190.149	NA	NA	NA	NA	NA	NA	NA	251.983	NA	NA	NA	NA	NA	NA	NA	NA	NA	173.384	NA	NA	NA	NA	NA	NA	NA	NA	NA	NA	NA	NA	NA	NA
TG 60:6	Analyte	17.4	RPFIAOnepoint	pos	TG 54:3	Level2	17.3	TG 54:4	Level2	17.1	NA	NA	NA	NA	NA	NA	NA	NA	NA	NA	NA	NA	NA	NA	NA	NA	NA	NA	NA	NA	NA	NA	NA	NA	NA	NA	NA	NA	NA	NA	NA	NA	NA	NA	NA	NA	NA	NA	NA
TG 60:7	Analyte	17.2	RPFIAOnepoint	pos	TG 54:3	Level2	17.3	TG 54:4	Level2	17.1	NA	NA	NA	NA	NA	NA	NA	NA	NA	NA	NA	NA	NA	NA	NA	NA	NA	NA	NA	NA	NA	NA	NA	NA	NA	NA	NA	NA	NA	NA	NA	NA	NA	NA	NA	NA	NA	NA	NA
TG 60:8	Analyte	17.1	RPFIAOnepoint	pos	TG 54:6	Level2	16.8	TG 54:5	Level2	17	NA	NA	NA	NA	NA	NA	NA	NA	NA	NA	NA	NA	NA	NA	NA	NA	NA	NA	NA	NA	NA	NA	NA	NA	NA	NA	NA	NA	NA	NA	NA	NA	NA	NA	NA	NA	NA	NA	NA
TG 60:9	Analyte	17	RPFIAOnepoint	pos	TG 54:6	Level2	16.8	TG 54:7	Level2	16.5	NA	NA	NA	NA	NA	NA	NA	NA	NA	NA	NA	NA	NA	NA	NA	NA	NA	NA	NA	NA	NA	NA	NA	NA	NA	NA	NA	NA	NA	NA	NA	NA	NA	NA	NA	NA	NA	NA	NA
TG 66:3	ESTD	18.6	RPMultipoint	pos	TG 60:3	Level3	17.9	TG 60:2	Level2	18.2	NA	NA	NA	NA	NA	NA	NA	NA	NA	NA	NA	NA	NA	NA	NA	NA	NA	NA	NA	NA	NA	NA	NA	NA	NA	NA	NA	NA	NA	NA	NA	NA	NA	NA	NA	NA	NA	NA	NA
TG P-50:0	Analyte	17.7	RPFIAOnepoint	pos	TG 54:3	Level2	17.3	TG 52:2	Level2	17.3	NA	NA	NA	NA	NA	NA	NA	NA	NA	NA	NA	NA	NA	NA	NA	NA	NA	NA	NA	NA	NA	NA	NA	NA	NA	NA	19.6983	NA	NA	NA	NA	NA	NA	NA	NA	NA	NA	NA	NA
TG P-52:1	Analyte	17.7	RPFIAOnepoint	pos	TG 54:3	Level2	17.3	TG 52:2	Level2	17.3	NA	NA	NA	NA	NA	NA	NA	NA	NA	NA	NA	NA	NA	NA	NA	NA	NA	NA	NA	NA	NA	NA	NA	NA	NA	4.7099	81.0705	NA	NA	NA	NA	NA	NA	NA	NA	NA	NA	NA	NA
[truncated: 112 more columns]

## Sheet: Results-Comparison
FileName [µmol/L (with dilution) for plasma samples, nmol/L for others]	Class	Analyte	AnalyteType	RT_mean_Analyte [min]	Formula_Analyte	RPFIAOnepoint_pos_SplashQC	RPFIAOnepoint_pos_Zscore	RPFIAOnepoint_pos	RPFIAOnepoint_neg_SplashQC	RPFIAOnepoint_neg_Zscore	RPFIAOnepoint_neg	RPMultipoint_neg_SplashQC	RPMultipoint_neg_Zscore	RPMultipoint_neg	RPMultipoint_pos_SplashQC	RPMultipoint_pos_Zscore	RPMultipoint_pos
Blank_Extr_LILY_rpMS1_posneg_1_Splash	SE	CE 18:1	DeutISTD	18.1	C45H78O2	NA	NA	NA	NA	NA	NA	NA	NA	NA	25.2481	-2.99293	1110.9
Blank_Extr_LILY_rpMS1_posneg_1_Splash	Cer	Cer 34:1;3	Analyte	11.8	H67C34NO4	NA	NA	NA	NA	NA	NA	NA	NA	NA	NA	NA	2.31984
Blank_Extr_LILY_rpMS1_posneg_1_Splash	DG	DG 30:0	Analyte	13.4	C33 H64 O5	NA	NA	NA	NA	NA	NA	NA	NA	NA	81.5706	-2.07379	17.7234
Blank_Extr_LILY_rpMS1_posneg_1_Splash	DG	DG 32:1	Analyte	13.5	C35H66O5	NA	NA	NA	NA	NA	NA	NA	NA	NA	81.5706	NA	17.6131
Blank_Extr_LILY_rpMS1_posneg_1_Splash	DG	DG 33:1	DeutISTD	13.9	C36H68O5	41.4932	NA	147.179	NA	NA	NA	NA	NA	NA	81.5706	NA	200.778
Blank_Extr_LILY_rpMS1_posneg_1_Splash	DG	DG 36:5	Analyte	11.9	H66C39O5	NA	NA	NA	NA	NA	NA	NA	NA	NA	81.5706	NA	1.66191
Blank_Extr_LILY_rpMS1_posneg_1_Splash	LPC	LPC 18:0	ESTD	3.6	C26H54NO7P	NA	NA	NA	NA	NA	NA	NA	NA	NA	65.7659	1.6445	8.18342
Blank_Extr_LILY_rpMS1_posneg_1_Splash	LPC	LPC 18:1	DeutISTD	2.8	C26H52NO7P	286.248	30.7626	3126.81	NA	NA	NA	NA	NA	NA	65.7659	-1.00776	602.167
Blank_Extr_LILY_rpMS1_posneg_1_Splash	LPE	LPE 18:1	DeutISTD	3	C23H46NO7P	NA	NA	NA	NA	NA	NA	107.506	1.36616	192.681	100.734	NA	203.226
Blank_Extr_LILY_rpMS1_posneg_1_Splash	PC	PC 33:1	DeutISTD	11.2	C41H80NO8P	NA	18.7663	9987.75	NA	NA	NA	84.9997	3.32484	2896.23	95.683	6.2087	3724.91
Blank_Extr_LILY_rpMS1_posneg_1_Splash	PC	PC 36:0	ESTD	14.1	H88C44NO8P	NA	NA	NA	NA	NA	NA	NA	NA	NA	95.683	-0.0953893	4.73793
Blank_Extr_LILY_rpMS1_posneg_1_Splash	PC	PC 36:1	ESTD	13.2	H86C44NO8P	NA	NA	NA	NA	NA	NA	NA	NA	NA	95.683	2.93474	4.68686
Blank_Extr_LILY_rpMS1_posneg_1_Splash	PC	PC 36:5	Analyte	9	H78C44NO8P	NA	NA	NA	NA	NA	NA	NA	NA	NA	95.683	1.55178	17.62
Blank_Extr_LILY_rpMS1_posneg_1_Splash	PC	PC 40:0	ESTD	15.6	C48 H96 O8 N1 P1	NA	NA	NA	NA	NA	NA	NA	NA	NA	95.683	NA	5.37615
Blank_Extr_LILY_rpMS1_posneg_1_Splash	PI	PI 33:1	DeutISTD	9.5	C42H79O13P	NA	NA	NA	NA	NA	NA	NA	NA	NA	59.8528	NA	199.69
Blank_Extr_LILY_rpMS1_posneg_1_Splash	TG	TG 48:1	DeutISTD	17.1	C51H96O6	NA	NA	NA	NA	NA	NA	NA	NA	NA	186.613	6.5691	2369.33
Blank_Extr_LILY_rpMS1_posneg_1_Splash	TG	TG 50:0	Analyte	17.5	C53H102O6	NA	NA	NA	NA	NA	NA	NA	NA	NA	186.613	11.3065	8.77888
Blank_Extr_LILY_rpMS1_posneg_1_Splash	TG	TG 50:1	Analyte	17.3	H100C53O6	NA	NA	NA	NA	NA	NA	NA	NA	NA	186.613	11.5672	7.25052
Blank_Extr_LILY_rpMS1_posneg_1_Splash	TG	TG 50:2	Analyte	17.1	H98C53O6	NA	NA	NA	NA	NA	NA	NA	NA	NA	186.613	11.7787	5.83122
Blank_Extr_LILY_rpMS1_posneg_2_Splash	SE	CE 18:1	DeutISTD	18.1	C45H78O2	NA	NA	NA	NA	NA	NA	NA	NA	NA	25.2481	-2.99293	1625.28
Blank_Extr_LILY_rpMS1_posneg_2_Splash	DG	DG 34:2	Analyte	13.7	H68C37O5	NA	NA	NA	NA	NA	NA	NA	NA	NA	81.5706	NA	3.60883
Blank_Extr_LILY_rpMS1_posneg_2_Splash	LPC	LPC 15:0	Analyte	2.5	C23H48NO7P	NA	NA	NA	NA	NA	NA	NA	NA	NA	65.7659	1.82031	2.95614
Blank_Extr_LILY_rpMS1_posneg_2_Splash	LPC	LPC 16:0	ESTD	2.8	C24H50NO7P	NA	NA	NA	NA	NA	NA	NA	NA	NA	65.7659	-0.229256	2.98785
Blank_Extr_LILY_rpMS1_posneg_2_Splash	LPC	LPC 18:1	DeutISTD	2.8	C26H52NO7P	286.248	30.7626	3194.07	NA	NA	NA	NA	NA	NA	65.7659	-1.00776	614.044
Blank_Extr_LILY_rpMS1_posneg_2_Splash	LPE	LPE 18:1	DeutISTD	3	C23H46NO7P	NA	NA	NA	NA	NA	NA	107.506	1.36616	195.925	100.734	NA	192.564
Blank_Extr_LILY_rpMS1_posneg_2_Splash	PC	PC 33:1	DeutISTD	11.2	C41H80NO8P	NA	18.7663	9238.79	NA	NA	NA	84.9997	3.32484	2765.28	95.683	6.2087	3451.52
Blank_Extr_LILY_rpMS1_posneg_2_Splash	PE	PE 33:1	DeutISTD	11.7	C38H74NO8P	60.2939	NA	102.66	201.817	NA	318.338	116.707	NA	174.167	146.568	NA	340.252
Blank_Extr_LILY_rpMS1_posneg_2_Splash	PI	PI 33:1	DeutISTD	9.5	C42H79O13P	NA	NA	NA	NA	NA	NA	NA	NA	NA	59.8528	NA	179.614
Blank_Extr_LILY_rpMS1_posneg_2_Splash	TG	TG 48:1	DeutISTD	17.1	C51H96O6	42.3543	-0.773831	568.681	NA	NA	NA	NA	NA	NA	186.613	6.5691	3507.79
Blank_Extr_LILY_rpMS1_posneg_3_Splash	SE	CE 18:1	DeutISTD	18.1	C45H78O2	NA	NA	NA	NA	NA	NA	NA	NA	NA	25.2481	-2.99293	3565.36
Blank_Extr_LILY_rpMS1_posneg_3_Splash	DG	DG 32:0	ESTD	14.4	C35H68O5	NA	NA	NA	NA	NA	NA	NA	NA	NA	81.5706	-0.983759	21.0605
Blank_Extr_LILY_rpMS1_posneg_3_Splash	DG	DG 33:1	DeutISTD	13.9	C36H68O5	41.4932	NA	121.879	NA	NA	NA	NA	NA	NA	81.5706	NA	373.666
Blank_Extr_LILY_rpMS1_posneg_3_Splash	DG	DG 36:4	Analyte	12.8	H68C39O5	NA	NA	NA	NA	NA	NA	NA	NA	NA	81.5706	-0.93735	1.26961
Blank_Extr_LILY_rpMS1_posneg_3_Splash	LPC	LPC 15:0	Analyte	2.5	C23H48NO7P	NA	NA	NA	NA	NA	NA	NA	NA	NA	65.7659	1.82031	3.03525
Blank_Extr_LILY_rpMS1_posneg_3_Splash	LPC	LPC 18:1	DeutISTD	2.8	C26H52NO7P	286.248	30.7626	3078.74	NA	NA	NA	NA	NA	NA	65.7659	-1.00776	593.679
Blank_Extr_LILY_rpMS1_posneg_3_Splash	LPE	LPE 18:1	DeutISTD	3	C23H46NO7P	NA	NA	NA	NA	NA	NA	107.506	1.36616	194.036	100.734	NA	202.798
Blank_Extr_LILY_rpMS1_posneg_3_Splash	PC	PC 33:1	DeutISTD	11.2	C41H80NO8P	NA	18.7663	8896.31	NA	NA	NA	84.9997	3.32484	3230.2	95.683	6.2087	3326.51
Blank_Extr_LILY_rpMS1_posneg_3_Splash	PC	PC 36:5	Analyte	9	H78C44NO8P	NA	NA	NA	NA	NA	NA	NA	NA	NA	95.683	1.55178	17.6208
Blank_Extr_LILY_rpMS1_posneg_3_Splash	PE	PE 33:1	DeutISTD	11.7	C38H74NO8P	60.2939	NA	100.457	201.817	NA	304.505	116.707	NA	179.707	146.568	NA	314.91
Blank_Extr_LILY_rpMS1_posneg_3_Splash	PI	PI 33:1	DeutISTD	9.5	C42H79O13P	NA	NA	NA	NA	NA	NA	NA	NA	NA	59.8528	NA	186.57
Blank_Extr_LILY_rpMS1_posneg_3_Splash	TG	TG 48:1	DeutISTD	17.1	C51H96O6	42.3543	-0.773831	551.255	NA	NA	NA	NA	NA	NA	186.613	6.5691	3153.14
Blank_ISTD_LILY_rpMS1_posneg_1	DG	DG 32:2	Analyte	12.5	H64C35O5	NA	NA	NA	NA	NA	NA	NA	NA	NA	81.5706	NA	10.4813
Blank_ISTD_LILY_rpMS1_posneg_1	DG	DG 34:0	Analyte	15.2	C37H72O5	NA	NA	NA	NA	NA	NA	NA	NA	NA	81.5706	NA	26.6657
Blank_ISTD_LILY_rpMS1_posneg_1	DG	DG 36:0	Analyte	15.8	C39H76O5	NA	NA	NA	NA	NA	NA	NA	NA	NA	81.5706	NA	33.127
Blank_ISTD_LILY_rpMS1_posneg_1	LPC	LPC 16:0	ESTD	2.8	C24H50NO7P	NA	NA	NA	NA	NA	NA	NA	NA	NA	65.7659	-0.229256	6.74577
Blank_ISTD_LILY_rpMS1_posneg_1	LPC	LPC 18:0	ESTD	3.6	C26H54NO7P	NA	NA	NA	NA	NA	NA	NA	NA	NA	65.7659	1.6445	8.97646
Blank_ISTD_LILY_rpMS1_posneg_1	LPC	LPC 18:1	DeutISTD	2.8	C26H52NO7P	NA	NA	NA	NA	NA	NA	NA	NA	NA	65.7659	-1.00776	2.79149
Blank_ISTD_LILY_rpMS1_posneg_1	LPC	LPC 20:2	Analyte	3	C28H54NO7P	NA	NA	NA	NA	NA	NA	NA	NA	NA	65.7659	4.47786	2.7679
Blank_ISTD_LILY_rpMS1_posneg_1	PC	PC 33:1	DeutISTD	11.2	C41H80NO8P	NA	NA	NA	NA	NA	NA	NA	NA	NA	95.683	6.2087	6.11186
Blank_ISTD_LILY_rpMS1_posneg_1	PC	PC 34:0	ESTD	13.1	C42 H84 O8 N1 P1	NA	NA	NA	NA	NA	NA	NA	NA	NA	95.683	3.47542	4.89173
Blank_ISTD_LILY_rpMS1_posneg_1	PC	PC 36:0	ESTD	14.1	H88C44NO8P	NA	NA	NA	NA	NA	NA	NA	NA	NA	95.683	-0.0953893	5.80309
Blank_ISTD_LILY_rpMS1_posneg_1	PC	PC 36:1	ESTD	13.2	H86C44NO8P	NA	NA	NA	NA	NA	NA	NA	NA	NA	95.683	2.93474	4.98312
Blank_ISTD_LILY_rpMS1_posneg_1	PC	PC 40:0	ESTD	15.6	C48 H96 O8 N1 P1	NA	NA	NA	NA	NA	NA	NA	NA	NA	95.683	NA	6.7327
Blank_ISTD_LILY_rpMS1_posneg_1	TG	TG 60:9	Analyte	17	C63 H104 O6	NA	NA	NA	NA	NA	NA	NA	NA	NA	186.613	NA	10.8208
Blank_ISTD_LILY_rpMS1_posneg_2	DG	DG 32:0	ESTD	14.4	C35H68O5	NA	NA	NA	NA	NA	NA	NA	NA	NA	81.5706	-0.983759	28.7109
Blank_ISTD_LILY_rpMS1_posneg_2	DG	DG 32:2	Analyte	12.5	H64C35O5	NA	NA	NA	NA	NA	NA	NA	NA	NA	81.5706	NA	10.4706
Blank_ISTD_LILY_rpMS1_posneg_2	DG	DG 34:0	Analyte	15.2	C37H72O5	NA	NA	NA	NA	NA	NA	NA	NA	NA	81.5706	NA	28.9282
Blank_ISTD_LILY_rpMS1_posneg_2	DG	DG 34:3	Analyte	12.6	H66C37O5	NA	NA	NA	NA	NA	NA	NA	NA	NA	81.5706	NA	16.3264
Blank_ISTD_LILY_rpMS1_posneg_2	DG	DG 36:0	Analyte	15.8	C39H76O5	NA	NA	NA	NA	NA	NA	NA	NA	NA	81.5706	NA	37.9222
Blank_ISTD_LILY_rpMS1_posneg_2	LPC	LPC 16:0	ESTD	2.8	C24H50NO7P	NA	NA	NA	NA	NA	NA	NA	NA	NA	65.7659	-0.229256	6.26824
Blank_ISTD_LILY_rpMS1_posneg_2	LPC	LPC 18:0	ESTD	3.6	C26H54NO7P	NA	NA	NA	NA	NA	NA	NA	NA	NA	65.7659	1.6445	8.87772
Blank_ISTD_LILY_rpMS1_posneg_2	LPC	LPC 18:1	DeutISTD	2.8	C26H52NO7P	NA	NA	NA	NA	NA	NA	NA	NA	NA	65.7659	-1.00776	2.80283
Blank_ISTD_LILY_rpMS1_posneg_2	PC	PC 33:1	DeutISTD	11.2	C41H80NO8P	NA	NA	NA	NA	NA	NA	NA	NA	NA	95.683	6.2087	6.14926
Blank_ISTD_LILY_rpMS1_posneg_2	PC	PC 34:0	ESTD	13.1	C42 H84 O8 N1 P1	NA	NA	NA	NA	NA	NA	NA	NA	NA	95.683	3.47542	4.7413
Blank_ISTD_LILY_rpMS1_posneg_2	PC	PC 36:0	ESTD	14.1	H88C44NO8P	NA	NA	NA	NA	NA	NA	NA	NA	NA	95.683	-0.0953893	5.31656
Blank_ISTD_LILY_rpMS1_posneg_2	PC	PC 40:0	ESTD	15.6	C48 H96 O8 N1 P1	NA	NA	NA	NA	NA	NA	NA	NA	NA	95.683	NA	5.83075
Blank_ISTD_LILY_rpMS1_posneg_3	DG	DG 32:0	ESTD	14.4	C35H68O5	NA	NA	NA	NA	NA	NA	NA	NA	NA	81.5706	-0.983759	25.0941
Blank_ISTD_LILY_rpMS1_posneg_3	DG	DG 34:0	Analyte	15.2	C37H72O5	NA	NA	NA	NA	NA	NA	NA	NA	NA	81.5706	NA	29.1944
Blank_ISTD_LILY_rpMS1_posneg_3	DG	DG 36:0	Analyte	15.8	C39H76O5	NA	NA	NA	NA	NA	NA	NA	NA	NA	81.5706	NA	31.4911
Blank_ISTD_LILY_rpMS1_posneg_3	LPC	LPC 18:0	ESTD	3.6	C26H54NO7P	NA	NA	NA	NA	NA	NA	NA	NA	NA	65.7659	1.6445	8.50341
Blank_ISTD_LILY_rpMS1_posneg_3	LPC	LPC 18:2	Analyte	2.4	H50C26NO7P	NA	NA	NA	NA	NA	NA	NA	NA	NA	65.7659	0.28858	3.20109
Blank_ISTD_LILY_rpMS1_posneg_3	PC	PC 33:1	DeutISTD	11.2	C41H80NO8P	NA	NA	NA	NA	NA	NA	NA	NA	NA	95.683	6.2087	6.09932
Blank_ISTD_LILY_rpMS1_posneg_3	PC	PC 36:0	ESTD	14.1	H88C44NO8P	NA	NA	NA	NA	NA	NA	NA	NA	NA	95.683	-0.0953893	4.9901
Blank_ISTD_LILY_rpMS1_posneg_3	PC	PC 38:2	Analyte	13.3	C46 H88 O8 N1 P1	NA	NA	NA	NA	NA	NA	NA	NA	NA	95.683	30.3611	5.38513
Blank_ISTD_LILY_rpMS1_posneg_3	PC	PC 40:0	ESTD	15.6	C48 H96 O8 N1 P1	NA	NA	NA	NA	NA	NA	NA	NA	NA	95.683	NA	5.36943
Blank_ISTD_LILY_rpMS1_posneg_3	PC	PC P-32:1	Analyte	11.4	C40H78NO7P	NA	NA	NA	NA	NA	NA	NA	NA	NA	95.683	7.00308	5.38377
ESTD_10000_LILY_rpMS1_posneg_1	SE	CE 18:3	Analyte	17.6	C45 H74 O2	NA	NA	NA	NA	NA	NA	NA	NA	NA	25.2481	0.000105709	170.247
ESTD_10000_LILY_rpMS1_posneg_1	Cer	Cer 40:1;2	Analyte	15.4	C40H79NO3	NA	NA	NA	NA	NA	NA	NA	4.11885	28.7025	NA	5.90022	418.719
ESTD_10000_LILY_rpMS1_posneg_1	Cer	Cer 40:2;2	Analyte	14.8	C40H77NO3	NA	NA	NA	NA	NA	NA	NA	3.69146	9.53441	NA	4.45088	10.7422
ESTD_10000_LILY_rpMS1_posneg_1	Cer	Cer 41:1;2	Analyte	15.7	C41H81NO3	NA	NA	NA	NA	NA	NA	NA	1.48689	15.0189	NA	2.01472	508.186
ESTD_10000_LILY_rpMS1_posneg_1	Cer	Cer 42:3;2	Analyte	14.7	C42H79NO3	NA	NA	NA	NA	NA	NA	NA	NA	28.3265	NA	NA	61.5747
ESTD_10000_LILY_rpMS1_posneg_1	Co	Co Q9	Analyte	16.3	C54 H82 O4	NA	NA	NA	NA	NA	NA	NA	NA	NA	NA	NA	26.5997
ESTD_10000_LILY_rpMS1_posneg_1	DG	DG 30:0	Analyte	13.4	C33 H64 O5	NA	NA	NA	NA	NA	NA	NA	NA	NA	81.5706	-2.07379	24.4871
ESTD_10000_LILY_rpMS1_posneg_1	DG	DG 32:1	Analyte	13.5	C35H66O5	NA	NA	NA	NA	NA	NA	NA	NA	NA	81.5706	NA	20.4321
ESTD_10000_LILY_rpMS1_posneg_1	DG	DG 32:2	Analyte	12.5	H64C35O5	NA	NA	NA	NA	NA	NA	NA	NA	NA	81.5706	NA	12.1029
ESTD_10000_LILY_rpMS1_posneg_1	DG	DG 33:1	Analyte	14	C36 H68 O5	NA	NA	NA	NA	NA	NA	NA	NA	NA	81.5706	NA	27.231
ESTD_10000_LILY_rpMS1_posneg_1	DG	DG 34:0	Analyte	15.2	C37H72O5	41.4932	NA	77.2544	NA	NA	NA	NA	NA	NA	81.5706	NA	164.43
ESTD_10000_LILY_rpMS1_posneg_1	DG	DG 36:0	Analyte	15.8	C39H76O5	41.4932	NA	123.957	NA	NA	NA	NA	NA	NA	81.5706	NA	163.656
ESTD_10000_LILY_rpMS1_posneg_1	DG	DG 36:3	Analyte	13.7	H70C39O5	NA	NA	NA	NA	NA	NA	NA	NA	NA	81.5706	-0.958183	3.77197
ESTD_10000_LILY_rpMS1_posneg_1	DG	DG 38:2	Analyte	15.2	C41 H76 O5	NA	NA	NA	NA	NA	NA	NA	NA	NA	81.5706	NA	17.7745
ESTD_10000_LILY_rpMS1_posneg_1	DG	DG 38:3	Analyte	14.6	C41 H74 O5	41.4932	NA	29.1945	NA	NA	NA	NA	NA	NA	81.5706	NA	60.612
ESTD_10000_LILY_rpMS1_posneg_1	HexCer	HexCer 38:1;2	Analyte	13.7	C44H85NO8	NA	NA	NA	NA	NA	NA	NA	NA	NA	NA	NA	40.3446
ESTD_10000_LILY_rpMS1_posneg_1	LPC	LPC 14:0	Analyte	2.2	C22H46NO7P	NA	NA	NA	NA	NA	NA	NA	NA	NA	65.7659	1.93593	16.7236
ESTD_10000_LILY_rpMS1_posneg_1	LPC	LPC 15:0	Analyte	2.5	C23H48NO7P	NA	NA	NA	NA	NA	NA	NA	NA	NA	65.7659	1.82031	19.8337
ESTD_10000_LILY_rpMS1_posneg_1	LPC	LPC 17:0	Analyte	3.2	C25H52NO7P	NA	NA	NA	NA	NA	NA	NA	NA	NA	65.7659	0.914974	12.3588
ESTD_10000_LILY_rpMS1_posneg_1	LPC	LPC 18:1	Analyte	2.9	H52C26NO7P	286.248	30.7626	152.433	NA	NA	NA	64.7639	-1.07539	70.2313	65.7659	-1.00776	49.0511
ESTD_10000_LILY_rpMS1_posneg_1	LPC	LPC 18:2	Analyte	2.4	H50C26NO7P	NA	NA	NA	NA	NA	NA	NA	NA	NA	65.7659	0.28858	15.6853
ESTD_10000_LILY_rpMS1_posneg_1	LPC	LPC 18:3	Analyte	2.1	H48C26NO7P	NA	NA	NA	NA	NA	NA	NA	NA	NA	65.7659	6.10183	17.5184
ESTD_10000_LILY_rpMS1_posneg_1	LPC	LPC 20:4	Analyte	2.3	C28H50NO7P	NA	NA	NA	NA	NA	NA	64.7639	4.19949	67.1556	65.7659	5.87883	60.921
ESTD_10000_LILY_rpMS1_posneg_1	LPC	LPC 22:6	Analyte	2.2	C30H50NO7P	NA	NA	NA	NA	NA	NA	NA	NA	NA	65.7659	9.47532	15.6909
ESTD_10000_LILY_rpMS1_posneg_1	PC	PC 30:0	Analyte	10.1	C38H76NO8P	NA	0.0074994	30.2453	NA	NA	NA	84.9997	-0.226819	45.4026	95.683	0.461465	39.8474
ESTD_10000_LILY_rpMS1_posneg_1	PC	PC 31:0	Analyte	11.1	C39H78NO8P	NA	13.7766	68.6829	NA	NA	NA	NA	NA	NA	95.683	5.86468	44.6892
ESTD_10000_LILY_rpMS1_posneg_1	PC	PC 32:1	Analyte	10.3	H78C40NO8P	NA	NA	NA	NA	NA	NA	84.9997	-1.41756	269.1	95.683	0.174428	20.7474
ESTD_10000_LILY_rpMS1_posneg_1	PC	PC 33:1	Analyte	11.2	H80C41NO8P	NA	18.7663	34.2847	NA	NA	NA	NA	NA	NA	95.683	6.2087	25.3394
ESTD_10000_LILY_rpMS1_posneg_1	PC	PC 34:3	Analyte	9.2	H78C42NO8P	NA	-3.22977	18.6692	NA	NA	NA	84.9997	-2.49798	37.3722	95.683	-2.01714	39.405
ESTD_10000_LILY_rpMS1_posneg_1	PC	PC 34:4	Analyte	8.4	H76C42NO8P	NA	0.0455125	7.54015	NA	NA	NA	NA	NA	NA	95.683	3.79822	28.996
ESTD_10000_LILY_rpMS1_posneg_1	PC	PC 35:0	Analyte	13.6	C43 H86 O8 N1 P1	NA	NA	58.682	NA	NA	NA	84.9997	NA	38.668	95.683	NA	41.1061
ESTD_10000_LILY_rpMS1_posneg_1	PC	PC 35:2	Analyte	11.4	H82C43NO8P	NA	NA	NA	NA	NA	NA	NA	NA	NA	95.683	-2.52083	18.1802
ESTD_10000_LILY_rpMS1_posneg_1	PC	PC 35:4	Analyte	9.4	H78C43NO8P	NA	5.73919	40.1534	NA	NA	NA	84.9997	1.05188	36.9699	95.683	-0.135175	48.9636
ESTD_10000_LILY_rpMS1_posneg_1	PC	PC 36:3	Analyte	11.1	H82C44NO8P	NA	NA	NA	NA	NA	NA	NA	NA	NA	95.683	0.371101	102.08
ESTD_10000_LILY_rpMS1_posneg_1	PC	PC 36:5	Analyte	9	H78C44NO8P	NA	-1.21003	79.7862	NA	NA	NA	84.9997	0.024299	116.541	95.683	1.55178	158.044
ESTD_10000_LILY_rpMS1_posneg_1	PC	PC 37:4	Analyte	11.3	H82C45NO8P	NA	4.95631	24.7406	NA	NA	NA	NA	NA	NA	95.683	-2.19729	20.9137
ESTD_10000_LILY_rpMS1_posneg_1	PC	PC 37:6	Analyte	8.8	C45H78NO8P	NA	4.26435	16.7977	NA	NA	NA	NA	NA	NA	95.683	1.52533	30.1222
ESTD_10000_LILY_rpMS1_posneg_1	PC	PC 38:0	Analyte	14.9	C46 H92 O8 N1 P1	NA	NA	NA	NA	NA	NA	NA	NA	NA	95.683	NA	24.3404
ESTD_10000_LILY_rpMS1_posneg_1	PC	PC 38:1	Analyte	14.1	C46 H90 O8 N1 P1	NA	NA	139.768	NA	NA	NA	84.9997	NA	70.466	95.683	NA	86.6399
ESTD_10000_LILY_rpMS1_posneg_1	PC	PC 38:2	Analyte	13.3	C46 H88 O8 N1 P1	NA	NA	NA	NA	NA	NA	84.9997	10.8615	17.1797	95.683	30.3611	21.7621
ESTD_10000_LILY_rpMS1_posneg_1	PC	PC 40:8	Analyte	8.5	C48H80NO8P	NA	3.41764	69.0539	NA	NA	NA	84.9997	1.02078	55.9566	95.683	3.57037	70.9683
ESTD_10000_LILY_rpMS1_posneg_1	PC	PC O-32:0	Analyte	12.8	C40 H82 O7 N1 P1	NA	NA	NA	NA	NA	NA	NA	NA	NA	95.683	5.86468	4.74061
ESTD_10000_LILY_rpMS1_posneg_1	PC	PC P-36:3	Analyte	11.6	C44H82NO7P	NA	NA	NA	NA	NA	NA	NA	NA	NA	95.683	-0.135175	8.08166
ESTD_10000_LILY_rpMS1_posneg_1	PE	PE 33:1	Analyte	11.8	H74C38NO8P	NA	NA	NA	201.817	NA	3.00503	NA	NA	NA	146.568	NA	4.19117
ESTD_10000_LILY_rpMS1_posneg_1	SPH	SPH 18:0;3	Analyte	2.4	C18 H39 O3 N1	NA	NA	NA	NA	NA	NA	NA	NA	NA	NA	NA	50.4258
ESTD_10000_LILY_rpMS1_posneg_1	TG	TG 40:0	Analyte	16.3	C43H82O6	NA	NA	NA	NA	NA	NA	NA	NA	NA	186.613	NA	12.6351
ESTD_10000_LILY_rpMS1_posneg_1	TG	TG 44:0	Analyte	16.9	C47H90O6	NA	NA	NA	NA	NA	NA	NA	NA	NA	186.613	NA	15.6547
ESTD_10000_LILY_rpMS1_posneg_1	TG	TG 46:0	Analyte	17.1	C49H94O6	NA	NA	NA	NA	NA	NA	NA	NA	NA	186.613	NA	39.4708
ESTD_10000_LILY_rpMS1_posneg_1	TG	TG 48:4	Analyte	16.4	H90C51O6	NA	NA	NA	NA	NA	NA	NA	NA	NA	186.613	-0.594309	23.6468
ESTD_10000_LILY_rpMS1_posneg_1	TG	TG 52:7	Analyte	16.4	H92C55O6	NA	NA	NA	NA	NA	NA	NA	NA	NA	186.613	4.08732	10.6857
ESTD_10000_LILY_rpMS1_posneg_1	TG	TG 54:8	Analyte	16.4	H94C57O6	42.3543	NA	46.7036	NA	NA	NA	NA	NA	NA	186.613	NA	134.395
ESTD_1000_LILY_rpMS1_posneg_1	Co	Co Q9	Analyte	16.3	C54 H82 O4	NA	NA	NA	NA	NA	NA	NA	NA	NA	NA	NA	3.48358
ESTD_1000_LILY_rpMS1_posneg_1	DG	DG 30:0	Analyte	13.4	C33 H64 O5	NA	NA	NA	NA	NA	NA	NA	NA	NA	81.5706	-2.07379	17.5789
ESTD_1000_LILY_rpMS1_posneg_1	DG	DG 32:2	Analyte	12.5	H64C35O5	NA	NA	NA	NA	NA	NA	NA	NA	NA	81.5706	NA	10.6092
ESTD_1000_LILY_rpMS1_posneg_1	DG	DG 33:1	Analyte	14	C36 H68 O5	NA	NA	NA	NA	NA	NA	NA	NA	NA	81.5706	NA	18.4508
ESTD_1000_LILY_rpMS1_posneg_1	DG	DG 34:0	Analyte	15.2	C37H72O5	41.4932	NA	42.1072	NA	NA	NA	NA	NA	NA	81.5706	NA	60.3066
ESTD_1000_LILY_rpMS1_posneg_1	DG	DG 34:3	Analyte	12.6	H66C37O5	NA	NA	NA	NA	NA	NA	NA	NA	NA	81.5706	NA	17.4278
ESTD_1000_LILY_rpMS1_posneg_1	DG	DG 36:0	Analyte	15.8	C39H76O5	41.4932	NA	52.3784	NA	NA	NA	NA	NA	NA	81.5706	NA	79.9704
ESTD_1000_LILY_rpMS1_posneg_1	DG	DG 38:3	Analyte	14.6	C41 H74 O5	NA	NA	NA	NA	NA	NA	NA	NA	NA	81.5706	NA	19.6486
ESTD_1000_LILY_rpMS1_posneg_1	LPC	LPC 14:0	Analyte	2.2	C22H46NO7P	NA	NA	NA	NA	NA	NA	NA	NA	NA	65.7659	1.93593	3.71673
ESTD_1000_LILY_rpMS1_posneg_1	LPC	LPC 18:3	Analyte	2.1	H48C26NO7P	NA	NA	NA	NA	NA	NA	NA	NA	NA	65.7659	6.10183	9.38823
ESTD_1000_LILY_rpMS1_posneg_1	LPC	LPC 20:4	Analyte	2.3	C28H50NO7P	NA	NA	NA	NA	NA	NA	NA	NA	NA	65.7659	5.87883	11.9175
ESTD_1000_LILY_rpMS1_posneg_1	LPC	LPC O-18:1	Analyte	4.1	C26 H54 O6 N1 P1	NA	NA	NA	NA	NA	NA	NA	NA	NA	65.7659	-0.90848	8.49913
ESTD_1000_LILY_rpMS1_posneg_1	PC	PC 31:0	Analyte	11.1	C39H78NO8P	NA	NA	NA	NA	NA	NA	NA	NA	NA	95.683	5.86468	7.8303
ESTD_1000_LILY_rpMS1_posneg_1	PC	PC 33:1	Analyte	11.2	H80C41NO8P	NA	NA	NA	NA	NA	NA	NA	NA	NA	95.683	6.2087	3.94305
ESTD_1000_LILY_rpMS1_posneg_1	PC	PC 35:0	Analyte	13.6	C43 H86 O8 N1 P1	NA	NA	NA	NA	NA	NA	NA	NA	NA	95.683	NA	7.38406
ESTD_1000_LILY_rpMS1_posneg_1	PC	PC 35:4	Analyte	9.4	H78C43NO8P	NA	5.73919	3.66196	NA	NA	NA	NA	NA	NA	95.683	-0.135175	20.3472
ESTD_1000_LILY_rpMS1_posneg_1	PC	PC 36:5	Analyte	9	H78C44NO8P	NA	NA	NA	NA	NA	NA	NA	NA	NA	95.683	1.55178	32.5491
ESTD_1000_LILY_rpMS1_posneg_1	PC	PC 37:1	Analyte	13.7	C45 H88 O8 N1 P1	NA	NA	NA	NA	NA	NA	NA	NA	NA	95.683	NA	4.81243
ESTD_1000_LILY_rpMS1_posneg_1	PC	PC 38:0	Analyte	14.9	C46 H92 O8 N1 P1	NA	NA	NA	NA	NA	NA	NA	NA	NA	95.683	NA	6.47753
ESTD_1000_LILY_rpMS1_posneg_1	PC	PC 38:1	Analyte	14.1	C46 H90 O8 N1 P1	NA	NA	NA	NA	NA	NA	NA	NA	NA	95.683	NA	10.273
ESTD_1000_LILY_rpMS1_posneg_1	PC	PC 38:2	Analyte	13.3	C46 H88 O8 N1 P1	NA	NA	NA	NA	NA	NA	NA	NA	NA	95.683	30.3611	6.04672
ESTD_1000_LILY_rpMS1_posneg_1	PC	PC 40:8	Analyte	8.5	C48H80NO8P	NA	3.41764	24.6516	NA	NA	NA	NA	NA	NA	95.683	3.57037	22.6025
ESTD_100_LILY_rpMS1_posneg_1	DG	DG 34:0	Analyte	15.2	C37H72O5	NA	NA	NA	NA	NA	NA	NA	NA	NA	81.5706	NA	22.3555
ESTD_100_LILY_rpMS1_posneg_1	DG	DG 34:3	Analyte	12.6	H66C37O5	NA	NA	NA	NA	NA	NA	NA	NA	NA	81.5706	NA	16.7519
ESTD_100_LILY_rpMS1_posneg_1	DG	DG 36:0	Analyte	15.8	C39H76O5	NA	NA	NA	NA	NA	NA	NA	NA	NA	81.5706	NA	32.6222
ESTD_100_LILY_rpMS1_posneg_1	LPC	LPC 18:1	DeutISTD	2.8	C26H52NO7P	NA	NA	NA	NA	NA	NA	NA	NA	NA	65.7659	-1.00776	2.77995
ESTD_100_LILY_rpMS1_posneg_1	PC	PC 36:5	Analyte	9	H78C44NO8P	NA	NA	NA	NA	NA	NA	NA	NA	NA	95.683	1.55178	18.1426
ESTD_100_LILY_rpMS1_posneg_1	PC	PC 38:1	Analyte	14.1	C46 H90 O8 N1 P1	NA	NA	NA	NA	NA	NA	NA	NA	NA	95.683	NA	5.34975
ESTD_100_LILY_rpMS1_posneg_1	PC	PC P-32:1	Analyte	11.4	C40H78NO7P	NA	NA	NA	NA	NA	NA	NA	NA	NA	95.683	7.00308	5.45395
ESTD_100_LILY_rpMS1_posneg_2	DG	DG 32:2	Analyte	12.5	H64C35O5	NA	NA	NA	NA	NA	NA	NA	NA	NA	81.5706	NA	10.4805
ESTD_100_LILY_rpMS1_posneg_2	DG	DG 34:0	Analyte	15.2	C37H72O5	NA	NA	NA	NA	NA	NA	NA	NA	NA	81.5706	NA	31.8004
ESTD_100_LILY_rpMS1_posneg_2	DG	DG 34:3	Analyte	12.6	H66C37O5	NA	NA	NA	NA	NA	NA	NA	NA	NA	81.5706	NA	16.6512
ESTD_100_LILY_rpMS1_posneg_2	DG	DG 36:0	Analyte	15.8	C39H76O5	NA	NA	NA	NA	NA	NA	NA	NA	NA	81.5706	NA	21.8167
ESTD_100_LILY_rpMS1_posneg_2	PC	PC 31:0	Analyte	11.1	C39H78NO8P	NA	NA	NA	NA	NA	NA	NA	NA	NA	95.683	5.86468	5.32529
ESTD_100_LILY_rpMS1_posneg_2	PC	PC 36:5	Analyte	9	H78C44NO8P	NA	NA	NA	NA	NA	NA	NA	NA	NA	95.683	1.55178	17.7412
ESTD_100_LILY_rpMS1_posneg_2	PC	PC 38:1	Analyte	14.1	C46 H90 O8 N1 P1	NA	NA	NA	NA	NA	NA	NA	NA	NA	95.683	NA	5.43373
ESTD_100_LILY_rpMS1_posneg_3	DG	DG 34:0	Analyte	15.2	C37H72O5	NA	NA	NA	NA	NA	NA	NA	NA	NA	81.5706	NA	23.8797
ESTD_100_LILY_rpMS1_posneg_3	DG	DG 34:3	Analyte	12.6	H66C37O5	NA	NA	NA	NA	NA	NA	NA	NA	NA	81.5706	NA	16.75
ESTD_100_LILY_rpMS1_posneg_3	DG	DG 36:0	Analyte	15.8	C39H76O5	NA	NA	NA	NA	NA	NA	NA	NA	NA	81.5706	NA	26.6841
ESTD_100_LILY_rpMS1_posneg_3	PC	PC 36:5	Analyte	9	H78C44NO8P	NA	NA	NA	NA	NA	NA	NA	NA	NA	95.683	1.55178	17.9056
ESTD_100_LILY_rpMS1_posneg_4	DG	DG 34:0	Analyte	15.2	C37H72O5	NA	NA	NA	NA	NA	NA	NA	NA	NA	81.5706	NA	29.4456
ESTD_100_LILY_rpMS1_posneg_4	DG	DG 34:3	Analyte	12.6	H66C37O5	NA	NA	NA	NA	NA	NA	NA	NA	NA	81.5706	NA	17.0138
ESTD_100_LILY_rpMS1_posneg_4	DG	DG 36:0	Analyte	15.8	C39H76O5	NA	NA	NA	NA	NA	NA	NA	NA	NA	81.5706	NA	39.3786
ESTD_100_LILY_rpMS1_posneg_4	PC	PC 33:1	DeutISTD	11.2	C41H80NO8P	NA	NA	NA	NA	NA	NA	NA	NA	NA	95.683	6.2087	5.42348
ESTD_100_LILY_rpMS1_posneg_4	PC	PC 36:5	Analyte	9	H78C44NO8P	NA	NA	NA	NA	NA	NA	NA	NA	NA	95.683	1.55178	17.918
ESTD_100_LILY_rpMS1_posneg_5	DG	DG 33:1	Analyte	14	C36 H68 O5	NA	NA	NA	NA	NA	NA	NA	NA	NA	81.5706	NA	17.5545
ESTD_100_LILY_rpMS1_posneg_5	DG	DG 34:0	Analyte	15.2	C37H72O5	NA	NA	NA	NA	NA	NA	NA	NA	NA	81.5706	NA	22.1148
ESTD_100_LILY_rpMS1_posneg_5	DG	DG 34:3	Analyte	12.6	H66C37O5	NA	NA	NA	NA	NA	NA	NA	NA	NA	81.5706	NA	16.8796
ESTD_100_LILY_rpMS1_posneg_5	DG	DG 36:0	Analyte	15.8	C39H76O5	NA	NA	NA	NA	NA	NA	NA	NA	NA	81.5706	NA	22.9104
ESTD_100_LILY_rpMS1_posneg_5	LPC	LPC 18:2	Analyte	2.4	H50C26NO7P	NA	NA	NA	NA	NA	NA	NA	NA	NA	65.7659	0.28858	2.91077
ESTD_100_LILY_rpMS1_posneg_5	PC	PC 36:5	Analyte	9	H78C44NO8P	NA	NA	NA	NA	NA	NA	NA	NA	NA	95.683	1.55178	18.2252
ESTD_100_LILY_rpMS1_posneg_5	PC	PC P-32:1	Analyte	11.4	C40H78NO7P	NA	NA	NA	NA	NA	NA	NA	NA	NA	95.683	7.00308	5.35337
ESTD_100_LILY_rpMS1_posneg_6	DG	DG 33:1	Analyte	14	C36 H68 O5	NA	NA	NA	NA	NA	NA	NA	NA	NA	81.5706	NA	17.6404
ESTD_100_LILY_rpMS1_posneg_6	DG	DG 34:3	Analyte	12.6	H66C37O5	NA	NA	NA	NA	NA	NA	NA	NA	NA	81.5706	NA	16.413
ESTD_100_LILY_rpMS1_posneg_6	DG	DG 36:0	Analyte	15.8	C39H76O5	NA	NA	NA	NA	NA	NA	NA	NA	NA	81.5706	NA	19.7443
ESTD_100_LILY_rpMS1_posneg_6	LPC	LPC 18:2	Analyte	2.4	H50C26NO7P	NA	NA	NA	NA	NA	NA	NA	NA	NA	65.7659	0.28858	2.82654
ESTD_100_LILY_rpMS1_posneg_6	PC	PC 33:1	DeutISTD	11.2	C41H80NO8P	NA	NA	NA	NA	NA	NA	NA	NA	NA	95.683	6.2087	5.33916
ESTD_100_LILY_rpMS1_posneg_6	PC	PC 35:0	Analyte	13.6	C43 H86 O8 N1 P1	NA	NA	NA	NA	NA	NA	NA	NA	NA	95.683	NA	4.72771
ESTD_100_LILY_rpMS1_posneg_6	PC	PC 38:1	Analyte	14.1	C46 H90 O8 N1 P1	NA	NA	NA	NA	NA	NA	NA	NA	NA	95.683	NA	5.38901
ESTD_100_LILY_rpMS1_posneg_6	PC	PC P-32:1	Analyte	11.4	C40H78NO7P	NA	NA	NA	NA	NA	NA	NA	NA	NA	95.683	7.00308	5.33058
ESTD_10_LILY_rpMS1_posneg_1	DG	DG 32:2	Analyte	12.5	H64C35O5	NA	NA	NA	NA	NA	NA	NA	NA	NA	81.5706	NA	10.4565
ESTD_10_LILY_rpMS1_posneg_1	DG	DG 34:0	Analyte	15.2	C37H72O5	NA	NA	NA	NA	NA	NA	NA	NA	NA	81.5706	NA	36.9012
ESTD_10_LILY_rpMS1_posneg_1	DG	DG 36:0	Analyte	15.8	C39H76O5	NA	NA	NA	NA	NA	NA	NA	NA	NA	81.5706	NA	33.7313
ESTD_10_LILY_rpMS1_posneg_1	LPC	LPC 18:2	Analyte	2.4	H50C26NO7P	NA	NA	NA	NA	NA	NA	NA	NA	NA	65.7659	0.28858	3.01786
ESTD_10_LILY_rpMS1_posneg_2	DG	DG 33:1	Analyte	14	C36 H68 O5	NA	NA	NA	NA	NA	NA	NA	NA	NA	81.5706	NA	17.5256
ESTD_10_LILY_rpMS1_posneg_2	DG	DG 34:0	Analyte	15.2	C37H72O5	NA	NA	NA	NA	NA	NA	NA	NA	NA	81.5706	NA	33.9008
ESTD_10_LILY_rpMS1_posneg_2	DG	DG 36:0	Analyte	15.8	C39H76O5	NA	NA	NA	NA	NA	NA	NA	NA	NA	81.5706	NA	40.7273
ESTD_10_LILY_rpMS1_posneg_2	LPC	LPC 14:0	Analyte	2.2	C22H46NO7P	NA	NA	NA	NA	NA	NA	NA	NA	NA	65.7659	1.93593	2.94974
ESTD_10_LILY_rpMS1_posneg_2	LPC	LPC 18:2	Analyte	2.4	H50C26NO7P	NA	NA	NA	NA	NA	NA	NA	NA	NA	65.7659	0.28858	2.88078
ESTD_10_LILY_rpMS1_posneg_2	PC	PC 33:1	DeutISTD	11.2	C41H80NO8P	NA	NA	NA	NA	NA	NA	NA	NA	NA	95.683	6.2087	5.43595
ESTD_10_LILY_rpMS1_posneg_3	DG	DG 33:1	Analyte	14	C36 H68 O5	NA	NA	NA	NA	NA	NA	NA	NA	NA	81.5706	NA	17.5576
ESTD_10_LILY_rpMS1_posneg_3	DG	DG 34:0	Analyte	15.2	C37H72O5	NA	NA	NA	NA	NA	NA	NA	NA	NA	81.5706	NA	32.8768
ESTD_10_LILY_rpMS1_posneg_3	DG	DG 34:3	Analyte	12.6	H66C37O5	NA	NA	NA	NA	NA	NA	NA	NA	NA	81.5706	NA	16.3606
ESTD_10_LILY_rpMS1_posneg_3	DG	DG 36:0	Analyte	15.8	C39H76O5	NA	NA	NA	NA	NA	NA	NA	NA	NA	81.5706	NA	28.98
ESTD_10_LILY_rpMS1_posneg_3	LPC	LPC 20:2	Analyte	3	C28H54NO7P	NA	NA	NA	NA	NA	NA	NA	NA	NA	65.7659	4.47786	2.81542
ESTD_10_LILY_rpMS1_posneg_3	PC	PC P-32:1	Analyte	11.4	C40H78NO7P	NA	NA	NA	NA	NA	NA	NA	NA	NA	95.683	7.00308	5.33137
ESTD_10_LILY_rpMS1_posneg_4	DG	DG 34:0	Analyte	15.2	C37H72O5	NA	NA	NA	NA	NA	NA	NA	NA	NA	81.5706	NA	29.9487
ESTD_10_LILY_rpMS1_posneg_4	DG	DG 36:0	Analyte	15.8	C39H76O5	NA	NA	NA	NA	NA	NA	NA	NA	NA	81.5706	NA	37.8784
ESTD_10_LILY_rpMS1_posneg_4	LPC	LPC 18:2	Analyte	2.4	H50C26NO7P	NA	NA	NA	NA	NA	NA	NA	NA	NA	65.7659	0.28858	3.31483
ESTD_10_LILY_rpMS1_posneg_4	PC	PC 33:1	DeutISTD	11.2	C41H80NO8P	NA	NA	NA	NA	NA	NA	NA	NA	NA	95.683	6.2087	5.49087
ESTD_10_LILY_rpMS1_posneg_4	PC	PC P-32:1	Analyte	11.4	C40H78NO7P	NA	NA	NA	NA	NA	NA	NA	NA	NA	95.683	7.00308	5.34264
ESTD_10_LILY_rpMS1_posneg_4	PC	PC P-38:2	Analyte	13.4	C46 H88 O7 N1 P1	NA	NA	NA	NA	NA	NA	NA	NA	NA	95.683	2.31404	5.35814
ESTD_10_LILY_rpMS1_posneg_5	DG	DG 34:0	Analyte	15.2	C37H72O5	NA	NA	NA	NA	NA	NA	NA	NA	NA	81.5706	NA	32.0229
ESTD_10_LILY_rpMS1_posneg_5	DG	DG 36:0	Analyte	15.8	C39H76O5	NA	NA	NA	NA	NA	NA	NA	NA	NA	81.5706	NA	37.4773
ESTD_10_LILY_rpMS1_posneg_6	DG	DG 34:0	Analyte	15.2	C37H72O5	NA	NA	NA	NA	NA	NA	NA	NA	NA	81.5706	NA	26.7102
ESTD_10_LILY_rpMS1_posneg_6	DG	DG 34:3	Analyte	12.6	H66C37O5	NA	NA	NA	NA	NA	NA	NA	NA	NA	81.5706	NA	16.6925
ESTD_10_LILY_rpMS1_posneg_6	DG	DG 36:0	Analyte	15.8	C39H76O5	NA	NA	NA	NA	NA	NA	NA	NA	NA	81.5706	NA	29.9338
ESTD_1_LILY_rpMS1_posneg_1	DG	DG 33:1	Analyte	14	C36 H68 O5	NA	NA	NA	NA	NA	NA	NA	NA	NA	81.5706	NA	17.5234
ESTD_1_LILY_rpMS1_posneg_1	DG	DG 34:0	Analyte	15.2	C37H72O5	NA	NA	NA	NA	NA	NA	NA	NA	NA	81.5706	NA	25.0822
ESTD_1_LILY_rpMS1_posneg_1	DG	DG 36:0	Analyte	15.8	C39H76O5	NA	NA	NA	NA	NA	NA	NA	NA	NA	81.5706	NA	28.9945
ESTD_1_LILY_rpMS1_posneg_1	PC	PC 33:1	DeutISTD	11.2	C41H80NO8P	NA	NA	NA	NA	NA	NA	NA	NA	NA	95.683	6.2087	5.80223
ESTD_1_LILY_rpMS1_posneg_1	TG	TG 58:9	Analyte	16.8	C61 H100 O6	NA	NA	NA	NA	NA	NA	NA	NA	NA	186.613	12.4022	11.3663
ESTD_1_LILY_rpMS1_posneg_2	DG	DG 34:0	Analyte	15.2	C37H72O5	NA	NA	NA	NA	NA	NA	NA	NA	NA	81.5706	NA	42.4234
ESTD_1_LILY_rpMS1_posneg_2	DG	DG 34:3	Analyte	12.6	H66C37O5	NA	NA	NA	NA	NA	NA	NA	NA	NA	81.5706	NA	16.4112
ESTD_1_LILY_rpMS1_posneg_2	DG	DG 36:0	Analyte	15.8	C39H76O5	NA	NA	NA	NA	NA	NA	NA	NA	NA	81.5706	NA	30.1169
ESTD_1_LILY_rpMS1_posneg_2	PC	PC 33:1	DeutISTD	11.2	C41H80NO8P	NA	NA	NA	NA	NA	NA	NA	NA	NA	95.683	6.2087	5.63115
ESTD_1_LILY_rpMS1_posneg_3	DG	DG 33:1	Analyte	14	C36 H68 O5	NA	NA	NA	NA	NA	NA	NA	NA	NA	81.5706	NA	17.5716
ESTD_1_LILY_rpMS1_posneg_3	DG	DG 34:0	Analyte	15.2	C37H72O5	NA	NA	NA	NA	NA	NA	NA	NA	NA	81.5706	NA	38.9373
ESTD_1_LILY_rpMS1_posneg_3	DG	DG 34:3	Analyte	12.6	H66C37O5	NA	NA	NA	NA	NA	NA	NA	NA	NA	81.5706	NA	16.5233
ESTD_1_LILY_rpMS1_posneg_3	DG	DG 36:0	Analyte	15.8	C39H76O5	NA	NA	NA	NA	NA	NA	NA	NA	NA	81.5706	NA	31.756
ESTD_1_LILY_rpMS1_posneg_3	PC	PC 33:1	DeutISTD	11.2	C41H80NO8P	NA	NA	NA	NA	NA	NA	NA	NA	NA	95.683	6.2087	5.61272
ESTD_1_LILY_rpMS1_posneg_3	PC	PC 38:2	Analyte	13.3	C46 H88 O8 N1 P1	NA	NA	NA	NA	NA	NA	NA	NA	NA	95.683	30.3611	5.36699
ESTD_1_LILY_rpMS1_posneg_4	DG	DG 33:1	Analyte	14	C36 H68 O5	NA	NA	NA	NA	NA	NA	NA	NA	NA	81.5706	NA	17.5381
ESTD_1_LILY_rpMS1_posneg_4	DG	DG 34:0	Analyte	15.2	C37H72O5	NA	NA	NA	NA	NA	NA	NA	NA	NA	81.5706	NA	35.7517
ESTD_1_LILY_rpMS1_posneg_4	DG	DG 34:3	Analyte	12.6	H66C37O5	NA	NA	NA	NA	NA	NA	NA	NA	NA	81.5706	NA	16.4224
ESTD_1_LILY_rpMS1_posneg_4	DG	DG 36:0	Analyte	15.8	C39H76O5	NA	NA	NA	NA	NA	NA	NA	NA	NA	81.5706	NA	30.4819
ESTD_1_LILY_rpMS1_posneg_4	PC	PC P-32:1	Analyte	11.4	C40H78NO7P	NA	NA	NA	NA	NA	NA	NA	NA	NA	95.683	7.00308	5.35765
ESTD_1_LILY_rpMS1_posneg_5	DG	DG 34:0	Analyte	15.2	C37H72O5	NA	NA	NA	NA	NA	NA	NA	NA	NA	81.5706	NA	30.5139
ESTD_1_LILY_rpMS1_posneg_5	DG	DG 36:0	Analyte	15.8	C39H76O5	NA	NA	NA	NA	NA	NA	NA	NA	NA	81.5706	NA	33.8832
ESTD_1_LILY_rpMS1_posneg_5	PC	PC 33:1	DeutISTD	11.2	C41H80NO8P	NA	NA	NA	NA	NA	NA	NA	NA	NA	95.683	6.2087	5.46517
ESTD_1_LILY_rpMS1_posneg_6	DG	DG 34:0	Analyte	15.2	C37H72O5	NA	NA	NA	NA	NA	NA	NA	NA	NA	81.5706	NA	39.4034
ESTD_1_LILY_rpMS1_posneg_6	DG	DG 34:3	Analyte	12.6	H66C37O5	NA	NA	NA	NA	NA	NA	NA	NA	NA	81.5706	NA	17.0697
ESTD_1_LILY_rpMS1_posneg_6	DG	DG 36:0	Analyte	15.8	C39H76O5	NA	NA	NA	NA	NA	NA	NA	NA	NA	81.5706	NA	31.7747
ESTD_25000_LILY_rpMS1_posneg_1	SE	CE 18:3	Analyte	17.6	C45 H74 O2	NA	NA	NA	NA	NA	NA	NA	NA	NA	25.2481	0.000105709	431.2
ESTD_25000_LILY_rpMS1_posneg_1	Co	Co Q9	Analyte	16.3	C54 H82 O4	NA	NA	NA	NA	NA	NA	NA	NA	NA	NA	NA	65.0752
ESTD_25000_LILY_rpMS1_posneg_1	DG	DG 30:0	Analyte	13.4	C33 H64 O5	41.4932	NA	10.4235	NA	NA	NA	NA	NA	NA	81.5706	-2.07379	33.0768
ESTD_25000_LILY_rpMS1_posneg_1	DG	DG 32:1	Analyte	13.5	C35H66O5	NA	NA	NA	NA	NA	NA	NA	NA	NA	81.5706	NA	27.4111
ESTD_25000_LILY_rpMS1_posneg_1	DG	DG 32:2	Analyte	12.5	H64C35O5	NA	NA	NA	NA	NA	NA	NA	NA	NA	81.5706	NA	15.304
ESTD_25000_LILY_rpMS1_posneg_1	DG	DG 33:1	Analyte	14	C36 H68 O5	41.4932	NA	51.5876	NA	NA	NA	NA	NA	NA	81.5706	NA	46.6062
ESTD_25000_LILY_rpMS1_posneg_1	DG	DG 34:0	Analyte	15.2	C37H72O5	41.4932	NA	100.645	NA	NA	NA	NA	NA	NA	81.5706	NA	179.76
ESTD_25000_LILY_rpMS1_posneg_1	DG	DG 34:2	Analyte	13.7	H68C37O5	NA	NA	NA	NA	NA	NA	NA	NA	NA	81.5706	NA	12.8034
ESTD_25000_LILY_rpMS1_posneg_1	DG	DG 35:2	Analyte	14	H70C38O5	NA	NA	NA	NA	NA	NA	NA	NA	NA	81.5706	NA	19.8468
ESTD_25000_LILY_rpMS1_posneg_1	DG	DG 36:0	Analyte	15.8	C39H76O5	41.4932	NA	149.59	NA	NA	NA	NA	NA	NA	81.5706	NA	192.909
ESTD_25000_LILY_rpMS1_posneg_1	DG	DG 36:1	Analyte	15.2	H74C39O5	NA	NA	NA	NA	NA	NA	NA	NA	NA	81.5706	NA	27.0313
ESTD_25000_LILY_rpMS1_posneg_1	DG	DG 36:3	Analyte	13.7	H70C39O5	NA	NA	NA	NA	NA	NA	NA	NA	NA	81.5706	-0.958183	7.5321
ESTD_25000_LILY_rpMS1_posneg_1	DG	DG 36:4	Analyte	12.8	H68C39O5	NA	NA	NA	NA	NA	NA	NA	NA	NA	81.5706	-0.93735	2.48177
ESTD_25000_LILY_rpMS1_posneg_1	DG	DG 38:2	Analyte	15.2	C41 H76 O5	NA	NA	NA	NA	NA	NA	NA	NA	NA	81.5706	NA	26.1183
ESTD_25000_LILY_rpMS1_posneg_1	DG	DG 38:3	Analyte	14.6	C41 H74 O5	41.4932	NA	105.714	NA	NA	NA	NA	NA	NA	81.5706	NA	193.982
ESTD_25000_LILY_rpMS1_posneg_1	DG	DG 38:5	Analyte	13.5	C41H70O5	NA	NA	NA	NA	NA	NA	NA	NA	NA	81.5706	NA	6.68263
ESTD_25000_LILY_rpMS1_posneg_1	SE	EE 18:0	Analyte	18	H78 C46 O2	NA	NA	NA	NA	NA	NA	NA	NA	NA	25.2481	NA	683.767
ESTD_25000_LILY_rpMS1_posneg_1	HexCer	HexCer 38:1;2	Analyte	13.7	C44H85NO8	NA	NA	52.279	NA	NA	NA	NA	NA	NA	NA	NA	102.657
ESTD_25000_LILY_rpMS1_posneg_1	LPC	LPC 14:0	Analyte	2.2	C22H46NO7P	NA	NA	NA	NA	NA	NA	NA	NA	NA	65.7659	1.93593	40.6004
ESTD_25000_LILY_rpMS1_posneg_1	LPC	LPC 15:0	Analyte	2.5	C23H48NO7P	286.248	12.4351	293.992	NA	NA	NA	NA	NA	NA	65.7659	1.82031	110.063
ESTD_25000_LILY_rpMS1_posneg_1	LPC	LPC 17:0	Analyte	3.2	C25H52NO7P	286.248	15.7275	127.728	NA	NA	NA	NA	NA	NA	65.7659	0.914974	56.3595
ESTD_25000_LILY_rpMS1_posneg_1	LPC	LPC 18:1	Analyte	2.9	H52C26NO7P	286.248	30.7626	447.575	NA	NA	NA	64.7639	-1.07539	133.033	65.7659	-1.00776	113.554
ESTD_25000_LILY_rpMS1_posneg_1	LPC	LPC 18:2	Analyte	2.4	H50C26NO7P	NA	NA	NA	NA	NA	NA	NA	NA	NA	65.7659	0.28858	35.0054
ESTD_25000_LILY_rpMS1_posneg_1	LPC	LPC 18:3	Analyte	2.1	H48C26NO7P	NA	NA	NA	NA	NA	NA	64.7639	7.08648	42.2895	65.7659	6.10183	30.8732
ESTD_25000_LILY_rpMS1_posneg_1	LPC	LPC 20:4	Analyte	2.3	C28H50NO7P	286.248	7.23678	98.6377	NA	NA	NA	64.7639	4.19949	116.917	65.7659	5.87883	126.997
ESTD_25000_LILY_rpMS1_posneg_1	LPC	LPC 22:6	Analyte	2.2	C30H50NO7P	NA	NA	NA	NA	NA	NA	64.7639	8.63267	38.3927	65.7659	9.47532	24.4721
ESTD_25000_LILY_rpMS1_posneg_1	PC	PC 30:0	Analyte	10.1	C38H76NO8P	NA	0.0074994	106.675	NA	NA	NA	84.9997	-0.226819	92.4838	95.683	0.461465	111.302
ESTD_25000_LILY_rpMS1_posneg_1	PC	PC 31:0	Analyte	11.1	C39H78NO8P	NA	13.7766	122.716	NA	NA	NA	NA	NA	NA	95.683	5.86468	72.4997
ESTD_25000_LILY_rpMS1_posneg_1	PC	PC 32:1	Analyte	10.3	H78C40NO8P	NA	-0.0199914	30.6871	NA	NA	NA	84.9997	-1.41756	573.478	95.683	0.174428	40.291
ESTD_25000_LILY_rpMS1_posneg_1	PC	PC 33:1	Analyte	11.2	H80C41NO8P	NA	18.7663	89.2318	NA	NA	NA	NA	NA	NA	95.683	6.2087	54.64
ESTD_25000_LILY_rpMS1_posneg_1	PC	PC 34:3	Analyte	9.2	H78C42NO8P	NA	-3.22977	46.9449	NA	NA	NA	84.9997	-2.49798	69.7989	95.683	-2.01714	81.2842
ESTD_25000_LILY_rpMS1_posneg_1	PC	PC 34:4	Analyte	8.4	H76C42NO8P	NA	0.0455125	20.0435	NA	NA	NA	84.9997	0.932281	32.2911	95.683	3.79822	49.8801
ESTD_25000_LILY_rpMS1_posneg_1	PC	PC 34:5	Analyte	7.1	H74C42NO8P	NA	NA	NA	NA	NA	NA	NA	NA	NA	95.683	85.6806	18.265
ESTD_25000_LILY_rpMS1_posneg_1	PC	PC 35:0	Analyte	13.6	C43 H86 O8 N1 P1	NA	NA	200.596	NA	NA	NA	84.9997	NA	85.6087	95.683	NA	109.064
ESTD_25000_LILY_rpMS1_posneg_1	PC	PC 35:2	Analyte	11.4	H82C43NO8P	NA	-1.42987	13.0531	NA	NA	NA	NA	NA	NA	95.683	-2.52083	23.5248
ESTD_25000_LILY_rpMS1_posneg_1	PC	PC 35:4	Analyte	9.4	H78C43NO8P	NA	5.73919	99.135	NA	NA	NA	84.9997	1.05188	82.047	95.683	-0.135175	93.8718
ESTD_25000_LILY_rpMS1_posneg_1	PC	PC 35:5	Analyte	8	H76C43NO8P	NA	NA	NA	NA	NA	NA	NA	NA	NA	95.683	-4.06069	18.1019
ESTD_25000_LILY_rpMS1_posneg_1	PC	PC 36:3	Analyte	11.1	H82C44NO8P	NA	-0.982896	213.667	NA	NA	NA	NA	NA	NA	95.683	0.371101	263.051
ESTD_25000_LILY_rpMS1_posneg_1	PC	PC 36:5	Analyte	9	H78C44NO8P	NA	-1.21003	226.912	NA	NA	NA	84.9997	0.024299	271.7	95.683	1.55178	379.338
ESTD_25000_LILY_rpMS1_posneg_1	PC	PC 37:4	Analyte	11.3	H82C45NO8P	NA	4.95631	62.7832	NA	NA	NA	NA	NA	NA	95.683	-2.19729	42.0748
ESTD_25000_LILY_rpMS1_posneg_1	PC	PC 37:6	Analyte	8.8	C45H78NO8P	NA	4.26435	41.1165	NA	NA	NA	84.9997	NA	35.4876	95.683	1.52533	49.697
ESTD_25000_LILY_rpMS1_posneg_1	PC	PC 38:0	Analyte	14.9	C46 H92 O8 N1 P1	NA	NA	94.6086	NA	NA	NA	NA	NA	NA	95.683	NA	84.1711
ESTD_25000_LILY_rpMS1_posneg_1	PC	PC 38:1	Analyte	14.1	C46 H90 O8 N1 P1	NA	NA	383.934	NA	NA	NA	84.9997	NA	151.294	95.683	NA	328.334
ESTD_25000_LILY_rpMS1_posneg_1	PC	PC 38:2	Analyte	13.3	C46 H88 O8 N1 P1	NA	43.0334	80.3703	NA	NA	NA	84.9997	10.8615	28.9514	95.683	30.3611	70.2094
ESTD_25000_LILY_rpMS1_posneg_1	PC	PC 40:8	Analyte	8.5	C48H80NO8P	NA	3.41764	184.257	NA	NA	NA	84.9997	1.02078	127.528	95.683	3.57037	158.341
ESTD_25000_LILY_rpMS1_posneg_1	PC	PC P-34:0	Analyte	12.8	C42 H84 O7 N1 P1	NA	NA	NA	NA	NA	NA	NA	NA	NA	95.683	6.2087	5.00128
ESTD_25000_LILY_rpMS1_posneg_1	PE	PE 33:1	Analyte	11.8	H74C38NO8P	60.2939	NA	6.43658	NA	NA	NA	NA	NA	NA	146.568	NA	10.4165
ESTD_25000_LILY_rpMS1_posneg_1	PE	PE 36:3	Analyte	11.5	H76C41NO8P	60.2939	-2.53369	5.17589	201.817	-2.08803	8.92013	116.707	-3.77346	7.04486	146.568	-2.13159	7.33313
ESTD_25000_LILY_rpMS1_posneg_1	PE	PE P-36:1	Analyte	14.1	C41H80NO7P	60.2939	1.67915	3.59153	NA	NA	NA	NA	NA	NA	146.568	-0.208772	5.48072
ESTD_25000_LILY_rpMS1_posneg_1	TG	TG 40:0	Analyte	16.3	C43H82O6	NA	NA	NA	NA	NA	NA	NA	NA	NA	186.613	NA	52.9491
ESTD_25000_LILY_rpMS1_posneg_1	TG	TG 42:1	Analyte	16.3	C45H84O6	NA	NA	NA	NA	NA	NA	NA	NA	NA	186.613	NA	10.3634
ESTD_25000_LILY_rpMS1_posneg_1	TG	TG 44:0	Analyte	16.9	C47H90O6	NA	NA	NA	NA	NA	NA	NA	NA	NA	186.613	NA	30.493
ESTD_25000_LILY_rpMS1_posneg_1	TG	TG 46:0	Analyte	17.1	C49H94O6	42.3543	NA	73.8006	NA	NA	NA	NA	NA	NA	186.613	NA	135.344
ESTD_25000_LILY_rpMS1_posneg_1	TG	TG 47:0	Analyte	17.2	C50H96O6	NA	NA	NA	NA	NA	NA	NA	NA	NA	186.613	NA	41.5297
ESTD_25000_LILY_rpMS1_posneg_1	TG	TG 47:3	Analyte	16.6	C50 H90 O6	NA	NA	NA	NA	NA	NA	NA	NA	NA	186.613	NA	17.326
ESTD_25000_LILY_rpMS1_posneg_1	TG	TG 48:4	Analyte	16.4	H90C51O6	42.3543	-2.43085	121.423	NA	NA	NA	NA	NA	NA	186.613	-0.594309	47.8905
ESTD_25000_LILY_rpMS1_posneg_1	TG	TG 49:3	Analyte	16.8	C52 H94 O6	NA	NA	NA	NA	NA	NA	NA	NA	NA	186.613	NA	20.0083
ESTD_25000_LILY_rpMS1_posneg_1	TG	TG 52:7	Analyte	16.4	H92C55O6	NA	NA	NA	NA	NA	NA	NA	NA	NA	186.613	4.08732	10.9416
ESTD_25000_LILY_rpMS1_posneg_1	TG	TG 54:5	Analyte	16.9	H100C57O6	42.3543	0.177039	76.7035	NA	NA	NA	NA	NA	NA	186.613	10.0364	250.271
ESTD_25000_LILY_rpMS1_posneg_1	TG	TG 54:7	Analyte	16.6	H96C57O6	42.3543	-1.57158	30.8238	NA	NA	NA	NA	NA	NA	186.613	1.08226	113.066
ESTD_25000_LILY_rpMS1_posneg_1	TG	TG 54:8	Analyte	16.4	H94C57O6	42.3543	NA	110.568	NA	NA	NA	NA	NA	NA	186.613	NA	309.601
ESTD_25000_LILY_rpMS1_posneg_1	TG	TG 58:2	Analyte	17.9	C61 H114 O6	42.3543	NA	5.64403	NA	NA	NA	NA	NA	NA	186.613	NA	41.0484
ESTD_25000_LILY_rpMS1_posneg_1	TG	TG 58:3	Analyte	17.7	C61 H112 O6	42.3543	-0.352804	70.029	NA	NA	NA	NA	NA	NA	186.613	NA	54.5302
ESTD_25000_LILY_rpMS1_posneg_1	TG	TG 60:4	Analyte	17.7	C63 H114 O6	42.3543	NA	60.6771	NA	NA	NA	NA	NA	NA	186.613	NA	50.1675
ESTD_250_LILY_rpMS1_posneg_1	DG	DG 33:1	Analyte	14	C36 H68 O5	NA	NA	NA	NA	NA	NA	NA	NA	NA	81.5706	NA	17.5568
ESTD_250_LILY_rpMS1_posneg_1	DG	DG 34:0	Analyte	15.2	C37H72O5	NA	NA	NA	NA	NA	NA	NA	NA	NA	81.5706	NA	43.8145
ESTD_250_LILY_rpMS1_posneg_1	DG	DG 34:3	Analyte	12.6	H66C37O5	NA	NA	NA	NA	NA	NA	NA	NA	NA	81.5706	NA	17.2226
ESTD_250_LILY_rpMS1_posneg_1	DG	DG 36:0	Analyte	15.8	C39H76O5	41.4932	NA	30.2835	NA	NA	NA	NA	NA	NA	81.5706	NA	50.2616
ESTD_250_LILY_rpMS1_posneg_1	PC	PC 31:0	Analyte	11.1	C39H78NO8P	NA	NA	NA	NA	NA	NA	NA	NA	NA	95.683	5.86468	5.59362
ESTD_250_LILY_rpMS1_posneg_1	PC	PC 35:0	Analyte	13.6	C43 H86 O8 N1 P1	NA	NA	NA	NA	NA	NA	NA	NA	NA	95.683	NA	5.15908
ESTD_250_LILY_rpMS1_posneg_1	PC	PC 36:5	Analyte	9	H78C44NO8P	NA	NA	NA	NA	NA	NA	NA	NA	NA	95.683	1.55178	19.8892
ESTD_250_LILY_rpMS1_posneg_1	PC	PC 38:0	Analyte	14.9	C46 H92 O8 N1 P1	NA	NA	NA	NA	NA	NA	NA	NA	NA	95.683	NA	5.49396
ESTD_250_LILY_rpMS1_posneg_1	PC	PC 38:1	Analyte	14.1	C46 H90 O8 N1 P1	NA	NA	NA	NA	NA	NA	NA	NA	NA	95.683	NA	5.96202
ESTD_250_LILY_rpMS1_posneg_1	PC	PC P-32:1	Analyte	11.4	C40H78NO7P	NA	NA	NA	NA	NA	NA	NA	NA	NA	95.683	7.00308	5.3515
ESTD_25_LILY_rpMS1_posneg_1	DG	DG 33:1	Analyte	14	C36 H68 O5	NA	NA	NA	NA	NA	NA	NA	NA	NA	81.5706	NA	17.5952
ESTD_25_LILY_rpMS1_posneg_1	DG	DG 34:0	Analyte	15.2	C37H72O5	NA	NA	NA	NA	NA	NA	NA	NA	NA	81.5706	NA	32.8338
ESTD_25_LILY_rpMS1_posneg_1	DG	DG 34:3	Analyte	12.6	H66C37O5	NA	NA	NA	NA	NA	NA	NA	NA	NA	81.5706	NA	16.4472
ESTD_25_LILY_rpMS1_posneg_1	DG	DG 36:0	Analyte	15.8	C39H76O5	NA	NA	NA	NA	NA	NA	NA	NA	NA	81.5706	NA	42.6581
ESTD_25_LILY_rpMS1_posneg_1	LPC	LPC 18:2	Analyte	2.4	H50C26NO7P	NA	NA	NA	NA	NA	NA	NA	NA	NA	65.7659	0.28858	3.08864
ESTD_25_LILY_rpMS1_posneg_1	PC	PC 38:2	Analyte	13.3	C46 H88 O8 N1 P1	NA	NA	NA	NA	NA	NA	NA	NA	NA	95.683	30.3611	5.35845
ESTD_5000_LILY_rpMS1_posneg_1	Cer	Cer 40:1;2	Analyte	15.4	C40H79NO3	NA	NA	NA	NA	NA	NA	NA	4.11885	16.5507	NA	5.90022	25.3359
ESTD_5000_LILY_rpMS1_posneg_1	Cer	Cer 41:1;2	Analyte	15.7	C41H81NO3	NA	NA	NA	NA	NA	NA	NA	1.48689	11.1747	NA	2.01472	31.3018
ESTD_5000_LILY_rpMS1_posneg_1	Co	Co Q9	Analyte	16.3	C54 H82 O4	NA	NA	NA	NA	NA	NA	NA	NA	NA	NA	NA	10.9285
ESTD_5000_LILY_rpMS1_posneg_1	DG	DG 30:0	Analyte	13.4	C33 H64 O5	NA	NA	NA	NA	NA	NA	NA	NA	NA	81.5706	-2.07379	21.1809
ESTD_5000_LILY_rpMS1_posneg_1	DG	DG 32:1	Analyte	13.5	C35H66O5	NA	NA	NA	NA	NA	NA	NA	NA	NA	81.5706	NA	18.8632
ESTD_5000_LILY_rpMS1_posneg_1	DG	DG 32:2	Analyte	12.5	H64C35O5	NA	NA	NA	NA	NA	NA	NA	NA	NA	81.5706	NA	11.1059
ESTD_5000_LILY_rpMS1_posneg_1	DG	DG 33:1	Analyte	14	C36 H68 O5	NA	NA	NA	NA	NA	NA	NA	NA	NA	81.5706	NA	22.2666
ESTD_5000_LILY_rpMS1_posneg_1	DG	DG 34:0	Analyte	15.2	C37H72O5	41.4932	NA	85.3491	NA	NA	NA	NA	NA	NA	81.5706	NA	112.687
ESTD_5000_LILY_rpMS1_posneg_1	DG	DG 36:0	Analyte	15.8	C39H76O5	41.4932	NA	100.58	NA	NA	NA	NA	NA	NA	81.5706	NA	136.979
ESTD_5000_LILY_rpMS1_posneg_1	DG	DG 38:2	Analyte	15.2	C41 H76 O5	NA	NA	NA	NA	NA	NA	NA	NA	NA	81.5706	NA	14.4117
ESTD_5000_LILY_rpMS1_posneg_1	LPC	LPC 14:0	Analyte	2.2	C22H46NO7P	NA	NA	NA	NA	NA	NA	NA	NA	NA	65.7659	1.93593	10.3767
ESTD_5000_LILY_rpMS1_posneg_1	LPC	LPC 15:0	Analyte	2.5	C23H48NO7P	NA	NA	NA	NA	NA	NA	NA	NA	NA	65.7659	1.82031	7.07113
ESTD_5000_LILY_rpMS1_posneg_1	LPC	LPC 17:0	Analyte	3.2	C25H52NO7P	NA	NA	NA	NA	NA	NA	NA	NA	NA	65.7659	0.914974	6.36441
ESTD_5000_LILY_rpMS1_posneg_1	LPC	LPC 18:1	Analyte	2.9	H52C26NO7P	NA	NA	NA	NA	NA	NA	64.7639	-1.07539	54.4379	65.7659	-1.00776	17.8142
ESTD_5000_LILY_rpMS1_posneg_1	LPC	LPC 18:2	Analyte	2.4	H50C26NO7P	NA	NA	NA	NA	NA	NA	NA	NA	NA	65.7659	0.28858	8.35252
ESTD_5000_LILY_rpMS1_posneg_1	LPC	LPC 18:3	Analyte	2.1	H48C26NO7P	NA	NA	NA	NA	NA	NA	NA	NA	NA	65.7659	6.10183	12.8127
ESTD_5000_LILY_rpMS1_posneg_1	LPC	LPC 20:4	Analyte	2.3	C28H50NO7P	NA	NA	NA	NA	NA	NA	64.7639	4.19949	45.5889	65.7659	5.87883	32.7563
ESTD_5000_LILY_rpMS1_posneg_1	LPC	LPC 22:6	Analyte	2.2	C30H50NO7P	NA	NA	NA	NA	NA	NA	NA	NA	NA	65.7659	9.47532	11.0231
ESTD_5000_LILY_rpMS1_posneg_1	PC	PC 30:0	Analyte	10.1	C38H76NO8P	NA	0.0074994	14.274	NA	NA	NA	NA	NA	NA	95.683	0.461465	23.8126
ESTD_5000_LILY_rpMS1_posneg_1	PC	PC 31:0	Analyte	11.1	C39H78NO8P	NA	13.7766	33.1728	NA	NA	NA	NA	NA	NA	95.683	5.86468	23.8109
ESTD_5000_LILY_rpMS1_posneg_1	PC	PC 32:1	Analyte	10.3	H78C40NO8P	NA	NA	NA	NA	NA	NA	84.9997	-1.41756	130.202	95.683	0.174428	15.4991
ESTD_5000_LILY_rpMS1_posneg_1	PC	PC 33:1	Analyte	11.2	H80C41NO8P	NA	18.7663	15.7321	NA	NA	NA	NA	NA	NA	95.683	6.2087	15.0488
ESTD_5000_LILY_rpMS1_posneg_1	PC	PC 34:3	Analyte	9.2	H78C42NO8P	NA	-3.22977	9.32339	NA	NA	NA	84.9997	-2.49798	21.6613	95.683	-2.01714	24.5073
ESTD_5000_LILY_rpMS1_posneg_1	PC	PC 34:4	Analyte	8.4	H76C42NO8P	NA	0.0455125	3.39116	NA	NA	NA	NA	NA	NA	95.683	3.79822	22.6267
ESTD_5000_LILY_rpMS1_posneg_1	PC	PC 35:0	Analyte	13.6	C43 H86 O8 N1 P1	NA	NA	NA	NA	NA	NA	84.9997	NA	17.7677	95.683	NA	21.393
ESTD_5000_LILY_rpMS1_posneg_1	PC	PC 35:2	Analyte	11.4	H82C43NO8P	NA	NA	NA	NA	NA	NA	NA	NA	NA	95.683	-2.52083	8.12609
ESTD_5000_LILY_rpMS1_posneg_1	PC	PC 35:4	Analyte	9.4	H78C43NO8P	NA	5.73919	19.6548	NA	NA	NA	NA	NA	NA	95.683	-0.135175	32.2483
ESTD_5000_LILY_rpMS1_posneg_1	PC	PC 36:3	Analyte	11.1	H82C44NO8P	NA	NA	NA	NA	NA	NA	NA	NA	NA	95.683	0.371101	55.8263
ESTD_5000_LILY_rpMS1_posneg_1	PC	PC 36:5	Analyte	9	H78C44NO8P	NA	-1.21003	44.8012	NA	NA	NA	84.9997	0.024299	61.9749	95.683	1.55178	96.6465
ESTD_5000_LILY_rpMS1_posneg_1	PC	PC 37:4	Analyte	11.3	H82C45NO8P	NA	4.95631	14.5323	NA	NA	NA	NA	NA	NA	95.683	-2.19729	15.4912
ESTD_5000_LILY_rpMS1_posneg_1	PC	PC 37:6	Analyte	8.8	C45H78NO8P	NA	4.26435	32.7652	NA	NA	NA	NA	NA	NA	95.683	1.52533	23.9038
ESTD_5000_LILY_rpMS1_posneg_1	PC	PC 38:0	Analyte	14.9	C46 H92 O8 N1 P1	NA	NA	NA	NA	NA	NA	NA	NA	NA	95.683	NA	12.9326
ESTD_5000_LILY_rpMS1_posneg_1	PC	PC 38:1	Analyte	14.1	C46 H90 O8 N1 P1	NA	NA	52.2837	NA	NA	NA	84.9997	NA	37.6701	95.683	NA	35.8945
ESTD_5000_LILY_rpMS1_posneg_1	PC	PC 38:2	Analyte	13.3	C46 H88 O8 N1 P1	NA	NA	NA	NA	NA	NA	NA	NA	NA	95.683	30.3611	11.7121
ESTD_5000_LILY_rpMS1_posneg_1	PC	PC 40:8	Analyte	8.5	C48H80NO8P	NA	3.41764	36.8892	NA	NA	NA	84.9997	1.02078	29.9983	95.683	3.57037	45.0734
ESTD_5000_LILY_rpMS1_posneg_1	TG	TG 46:0	Analyte	17.1	C49H94O6	NA	NA	NA	NA	NA	NA	NA	NA	NA	186.613	NA	25.1259
ESTD_5000_LILY_rpMS1_posneg_1	TG	TG 52:7	Analyte	16.4	H92C55O6	NA	NA	NA	NA	NA	NA	NA	NA	NA	186.613	4.08732	10.4714
ESTD_500_LILY_rpMS1_posneg_1	DG	DG 33:1	Analyte	14	C36 H68 O5	NA	NA	NA	NA	NA	NA	NA	NA	NA	81.5706	NA	17.6892
ESTD_500_LILY_rpMS1_posneg_1	DG	DG 34:0	Analyte	15.2	C37H72O5	NA	NA	NA	NA	NA	NA	NA	NA	NA	81.5706	NA	43.742
ESTD_500_LILY_rpMS1_posneg_1	DG	DG 34:3	Analyte	12.6	H66C37O5	NA	NA	NA	NA	NA	NA	NA	NA	NA	81.5706	NA	17.908
ESTD_500_LILY_rpMS1_posneg_1	DG	DG 36:0	Analyte	15.8	C39H76O5	41.4932	NA	37.6876	NA	NA	NA	NA	NA	NA	81.5706	NA	63.2312
ESTD_500_LILY_rpMS1_posneg_1	DG	DG 38:3	Analyte	14.6	C41 H74 O5	NA	NA	NA	NA	NA	NA	NA	NA	NA	81.5706	NA	16.3234
ESTD_500_LILY_rpMS1_posneg_1	LPC	LPC 14:0	Analyte	2.2	C22H46NO7P	NA	NA	NA	NA	NA	NA	NA	NA	NA	65.7659	1.93593	2.9636
ESTD_500_LILY_rpMS1_posneg_1	LPC	LPC 18:2	Analyte	2.4	H50C26NO7P	NA	NA	NA	NA	NA	NA	NA	NA	NA	65.7659	0.28858	3.11374
ESTD_500_LILY_rpMS1_posneg_1	LPC	LPC 20:4	Analyte	2.3	C28H50NO7P	NA	NA	NA	NA	NA	NA	NA	NA	NA	65.7659	5.87883	9.836
ESTD_500_LILY_rpMS1_posneg_1	LPC	LPC O-18:1	Analyte	4.1	C26 H54 O6 N1 P1	NA	NA	NA	NA	NA	NA	NA	NA	NA	65.7659	-0.90848	8.16946
ESTD_500_LILY_rpMS1_posneg_1	PC	PC 31:0	Analyte	11.1	C39H78NO8P	NA	NA	NA	NA	NA	NA	NA	NA	NA	95.683	5.86468	6.15222
ESTD_500_LILY_rpMS1_posneg_1	PC	PC 33:1	Analyte	11.2	H80C41NO8P	NA	NA	NA	NA	NA	NA	NA	NA	NA	95.683	6.2087	5.64605
ESTD_500_LILY_rpMS1_posneg_1	PC	PC 35:0	Analyte	13.6	C43 H86 O8 N1 P1	NA	NA	NA	NA	NA	NA	NA	NA	NA	95.683	NA	5.60779
ESTD_500_LILY_rpMS1_posneg_1	PC	PC 36:5	Analyte	9	H78C44NO8P	NA	NA	NA	NA	NA	NA	NA	NA	NA	95.683	1.55178	23.5851
ESTD_500_LILY_rpMS1_posneg_1	PC	PC 38:0	Analyte	14.9	C46 H92 O8 N1 P1	NA	NA	NA	NA	NA	NA	NA	NA	NA	95.683	NA	5.65173
ESTD_500_LILY_rpMS1_posneg_1	PC	PC 38:1	Analyte	14.1	C46 H90 O8 N1 P1	NA	NA	NA	NA	NA	NA	NA	NA	NA	95.683	NA	6.78544
ESTD_500_LILY_rpMS1_posneg_1	PC	PC 38:2	Analyte	13.3	C46 H88 O8 N1 P1	NA	NA	NA	NA	NA	NA	NA	NA	NA	95.683	30.3611	5.3761
ESTD_500_LILY_rpMS1_posneg_1	PC	PC 40:8	Analyte	8.5	C48H80NO8P	NA	3.41764	11.0917	NA	NA	NA	NA	NA	NA	95.683	3.57037	19.6939
ESTD_50_LILY_rpMS1_posneg_1	DG	DG 34:0	Analyte	15.2	C37H72O5	NA	NA	NA	NA	NA	NA	NA	NA	NA	81.5706	NA	35.5308
ESTD_50_LILY_rpMS1_posneg_1	DG	DG 36:0	Analyte	15.8	C39H76O5	NA	NA	NA	NA	NA	NA	NA	NA	NA	81.5706	NA	36.7402
ESTD_50_LILY_rpMS1_posneg_1	LPC	LPC 18:2	Analyte	2.4	H50C26NO7P	NA	NA	NA	NA	NA	NA	NA	NA	NA	65.7659	0.28858	2.9922
ESTD_50_LILY_rpMS1_posneg_1	LPC	LPC 20:2	Analyte	3	C28H54NO7P	NA	NA	NA	NA	NA	NA	NA	NA	NA	65.7659	4.47786	2.81201
ESTD_50_LILY_rpMS1_posneg_1	PC	PC P-32:1	Analyte	11.4	C40H78NO7P	NA	NA	NA	NA	NA	NA	NA	NA	NA	95.683	7.00308	5.43071
ESTD_5_LILY_rpMS1_posneg_1	DG	DG 34:0	Analyte	15.2	C37H72O5	NA	NA	NA	NA	NA	NA	NA	NA	NA	81.5706	NA	30.1501
ESTD_5_LILY_rpMS1_posneg_1	DG	DG 34:3	Analyte	12.6	H66C37O5	NA	NA	NA	NA	NA	NA	NA	NA	NA	81.5706	NA	16.405
ESTD_5_LILY_rpMS1_posneg_1	DG	DG 36:0	Analyte	15.8	C39H76O5	NA	NA	NA	NA	NA	NA	NA	NA	NA	81.5706	NA	40.0797
ESTD_5_LILY_rpMS1_posneg_1	LPC	LPC 18:2	Analyte	2.4	H50C26NO7P	NA	NA	NA	NA	NA	NA	NA	NA	NA	65.7659	0.28858	3.08225
ESTD_5_LILY_rpMS1_posneg_1	PC	PC P-32:1	Analyte	11.4	C40H78NO7P	NA	NA	NA	NA	NA	NA	NA	NA	NA	95.683	7.00308	5.34663
ESTD_5_LILY_rpMS1_posneg_1	PC	PC P-34:0	Analyte	12.8	C42 H84 O7 N1 P1	NA	NA	NA	NA	NA	NA	NA	NA	NA	95.683	6.2087	4.71064
ESTD_5_LILY_rpMS1_posneg_1	PC	PC P-38:2	Analyte	13.4	C46 H88 O7 N1 P1	NA	NA	NA	NA	NA	NA	NA	NA	NA	95.683	2.31404	5.35744
ESTD_750_LILY_rpMS1_posneg_1	DG	DG 33:1	Analyte	14	C36 H68 O5	NA	NA	NA	NA	NA	NA	NA	NA	NA	81.5706	NA	18.0763
ESTD_750_LILY_rpMS1_posneg_1	DG	DG 34:0	Analyte	15.2	C37H72O5	41.4932	NA	30.2322	NA	NA	NA	NA	NA	NA	81.5706	NA	51.2712
ESTD_750_LILY_rpMS1_posneg_1	DG	DG 34:3	Analyte	12.6	H66C37O5	NA	NA	NA	NA	NA	NA	NA	NA	NA	81.5706	NA	17.3039
ESTD_750_LILY_rpMS1_posneg_1	DG	DG 36:0	Analyte	15.8	C39H76O5	41.4932	NA	29.6312	NA	NA	NA	NA	NA	NA	81.5706	NA	49.4342
ESTD_750_LILY_rpMS1_posneg_1	DG	DG 38:3	Analyte	14.6	C41 H74 O5	NA	NA	NA	NA	NA	NA	NA	NA	NA	81.5706	NA	17.3201
ESTD_750_LILY_rpMS1_posneg_1	LPC	LPC 14:0	Analyte	2.2	C22H46NO7P	NA	NA	NA	NA	NA	NA	NA	NA	NA	65.7659	1.93593	3.32213
ESTD_750_LILY_rpMS1_posneg_1	LPC	LPC 20:4	Analyte	2.3	C28H50NO7P	NA	NA	NA	NA	NA	NA	NA	NA	NA	65.7659	5.87883	10.7162
ESTD_750_LILY_rpMS1_posneg_1	LPC	LPC O-18:1	Analyte	4.1	C26 H54 O6 N1 P1	NA	NA	NA	NA	NA	NA	NA	NA	NA	65.7659	-0.90848	8.28199
ESTD_750_LILY_rpMS1_posneg_1	PC	PC 31:0	Analyte	11.1	C39H78NO8P	NA	NA	NA	NA	NA	NA	NA	NA	NA	95.683	5.86468	6.60942
ESTD_750_LILY_rpMS1_posneg_1	PC	PC 35:0	Analyte	13.6	C43 H86 O8 N1 P1	NA	NA	NA	NA	NA	NA	NA	NA	NA	95.683	NA	6.4944
ESTD_750_LILY_rpMS1_posneg_1	PC	PC 35:4	Analyte	9.4	H78C43NO8P	NA	5.73919	2.33535	NA	NA	NA	NA	NA	NA	95.683	-0.135175	19.3599
ESTD_750_LILY_rpMS1_posneg_1	PC	PC 36:3	Analyte	11.1	H82C44NO8P	NA	NA	NA	NA	NA	NA	NA	NA	NA	95.683	0.371101	15.9461
ESTD_750_LILY_rpMS1_posneg_1	PC	PC 36:5	Analyte	9	H78C44NO8P	NA	NA	NA	NA	NA	NA	NA	NA	NA	95.683	1.55178	25.9944
ESTD_750_LILY_rpMS1_posneg_1	PC	PC 38:0	Analyte	14.9	C46 H92 O8 N1 P1	NA	NA	NA	NA	NA	NA	NA	NA	NA	95.683	NA	6.26895
ESTD_750_LILY_rpMS1_posneg_1	PC	PC 38:1	Analyte	14.1	C46 H90 O8 N1 P1	NA	NA	NA	NA	NA	NA	NA	NA	NA	95.683	NA	8.20722
ESTD_750_LILY_rpMS1_posneg_1	PC	PC 38:2	Analyte	13.3	C46 H88 O8 N1 P1	NA	NA	NA	NA	NA	NA	NA	NA	NA	95.683	30.3611	5.41406
ESTD_750_LILY_rpMS1_posneg_1	PC	PC 40:8	Analyte	8.5	C48H80NO8P	NA	3.41764	15.6748	NA	NA	NA	NA	NA	NA	95.683	3.57037	20.7387
ESTD_75_LILY_rpMS1_posneg_1	DG	DG 34:0	Analyte	15.2	C37H72O5	NA	NA	NA	NA	NA	NA	NA	NA	NA	81.5706	NA	35.3716
ESTD_75_LILY_rpMS1_posneg_1	DG	DG 34:3	Analyte	12.6	H66C37O5	NA	NA	NA	NA	NA	NA	NA	NA	NA	81.5706	NA	16.8812
ESTD_75_LILY_rpMS1_posneg_1	DG	DG 36:0	Analyte	15.8	C39H76O5	41.4932	NA	27.6829	NA	NA	NA	NA	NA	NA	81.5706	NA	46.9633
QC_ESTD10000nM_LILY_rpMS1_posneg_1	SE	CE 16:0	ESTD	18.2	C43H76O2	NA	NA	NA	NA	NA	NA	NA	NA	NA	25.2481	3.55126	11166.8
QC_ESTD10000nM_LILY_rpMS1_posneg_1	SE	CE 18:0	ESTD	18.6	C45H80O2	NA	NA	NA	NA	NA	NA	NA	NA	NA	25.2481	17.3164	12148.2
QC_ESTD10000nM_LILY_rpMS1_posneg_1	SE	CE 18:2	ESTD	17.9	C45H76O2	NA	NA	NA	NA	NA	NA	NA	NA	NA	25.2481	-1.13607	5210.63
QC_ESTD10000nM_LILY_rpMS1_posneg_1	Cer	Cer 34:1;2	ESTD	12.6	C34H67NO3	NA	NA	NA	NA	NA	NA	NA	3.73008	9786.36	NA	5.27689	11438.5
QC_ESTD10000nM_LILY_rpMS1_posneg_1	Co	Co Q10	ESTD	16.8	C59H90O4	NA	NA	NA	NA	NA	NA	NA	NA	NA	NA	NA	9121.33
QC_ESTD10000nM_LILY_rpMS1_posneg_1	Co	Co Q9	Analyte	16.3	C54 H82 O4	NA	NA	NA	NA	NA	NA	NA	NA	NA	NA	NA	27.0568
QC_ESTD10000nM_LILY_rpMS1_posneg_1	DG	DG 32:0	ESTD	14.4	C35H68O5	41.4932	-1.37416	7488.29	NA	NA	NA	NA	NA	NA	81.5706	-0.983759	9198.84
QC_ESTD10000nM_LILY_rpMS1_posneg_1	DG	DG 33:1	Analyte	14	C36 H68 O5	NA	NA	NA	NA	NA	NA	NA	NA	NA	81.5706	NA	27.8833
QC_ESTD10000nM_LILY_rpMS1_posneg_1	DG	DG 34:1	ESTD	14.4	C37H70O5	41.4932	-1.03827	9338.47	NA	NA	NA	NA	NA	NA	81.5706	-0.431748	11316.9
QC_ESTD10000nM_LILY_rpMS1_posneg_1	DG	DG 36:0	Analyte	15.8	C39H76O5	41.4932	NA	120.601	NA	NA	NA	NA	NA	NA	81.5706	NA	159.827
QC_ESTD10000nM_LILY_rpMS1_posneg_1	DG	DG 36:2	ESTD	14.5	C39H72O5	41.4932	-1.52589	6528.85	NA	NA	NA	NA	NA	NA	81.5706	-0.511262	10247.2
QC_ESTD10000nM_LILY_rpMS1_posneg_1	DG	DG 38:4	ESTD	14.4	C41H72O5	41.4932	NA	7708.78	NA	NA	NA	NA	NA	NA	81.5706	NA	12094.1
QC_ESTD10000nM_LILY_rpMS1_posneg_1	DG	DG 40:6	ESTD	14.1	C43H72O5	41.4932	NA	8350.92	NA	NA	NA	NA	NA	NA	81.5706	NA	11499.1
QC_ESTD10000nM_LILY_rpMS1_posneg_1	HexCer	HexCer 34:1;2	ESTD	11.1	C40H77NO8	NA	NA	7773.17	NA	NA	NA	NA	NA	NA	NA	NA	21276.6
QC_ESTD10000nM_LILY_rpMS1_posneg_1	HexCer	HexCer 36:1;2	ESTD	12.6	C42H81NO8	NA	NA	3209.48	NA	NA	NA	NA	NA	NA	NA	NA	11194.3
QC_ESTD10000nM_LILY_rpMS1_posneg_1	HexCer	HexCer 38:1;2	Analyte	13.7	C44H85NO8	NA	NA	NA	NA	NA	NA	NA	NA	NA	NA	NA	53.597
QC_ESTD10000nM_LILY_rpMS1_posneg_1	HexCer	HexCer 42:2;2	ESTD	14.5	C48 H91 O8 N1	NA	NA	4814.99	NA	NA	NA	NA	NA	NA	NA	NA	10189.9
QC_ESTD10000nM_LILY_rpMS1_posneg_1	LPC	LPC 14:0	Analyte	2.2	C22H46NO7P	NA	NA	NA	NA	NA	NA	NA	NA	NA	65.7659	1.93593	17.6247
QC_ESTD10000nM_LILY_rpMS1_posneg_1	LPC	LPC 18:1	Analyte	2.9	H52C26NO7P	286.248	30.7626	152.964	NA	NA	NA	64.7639	-1.07539	71.5929	65.7659	-1.00776	49.1668
QC_ESTD10000nM_LILY_rpMS1_posneg_1	LPC	LPC 18:3	Analyte	2.1	H48C26NO7P	NA	NA	NA	NA	NA	NA	NA	NA	NA	65.7659	6.10183	18.789
QC_ESTD10000nM_LILY_rpMS1_posneg_1	LPC	LPC 22:6	Analyte	2.2	C30H50NO7P	NA	NA	NA	NA	NA	NA	NA	NA	NA	65.7659	9.47532	13.3613
QC_ESTD10000nM_LILY_rpMS1_posneg_1	LPE	LPE 18:0	ESTD	3.8	H48C23NO7P	NA	NA	NA	NA	NA	NA	107.506	0.708065	6492.43	100.734	0.827119	7275.06
QC_ESTD10000nM_LILY_rpMS1_posneg_1	PC	PC 30:0	Analyte	10.1	C38H76NO8P	NA	0.0074994	32.0556	NA	NA	NA	84.9997	-0.226819	46.6604	95.683	0.461465	41.6649
QC_ESTD10000nM_LILY_rpMS1_posneg_1	PC	PC 31:0	Analyte	11.1	C39H78NO8P	NA	13.7766	72.2343	NA	NA	NA	NA	NA	NA	95.683	5.86468	46.409
QC_ESTD10000nM_LILY_rpMS1_posneg_1	PC	PC 32:0	ESTD	11.9	C40H80NO8P	NA	4.84221	4748.75	NA	NA	NA	84.9997	-1.82125	3749.88	95.683	-1.31431	4334.94
QC_ESTD10000nM_LILY_rpMS1_posneg_1	PC	PC 32:1	Analyte	10.3	H78C40NO8P	NA	NA	NA	NA	NA	NA	84.9997	-1.41756	269.97	95.683	0.174428	21.3301
QC_ESTD10000nM_LILY_rpMS1_posneg_1	PC	PC 33:1	DeutISTD	11.2	C41H80NO8P	NA	NA	NA	NA	NA	NA	NA	NA	NA	95.683	6.2087	5.83969
QC_ESTD10000nM_LILY_rpMS1_posneg_1	PC	PC 34:0	ESTD	13.1	C42 H84 O8 N1 P1	NA	12.1794	12569.8	NA	NA	NA	84.9997	2.73633	5242.31	95.683	3.47542	5327.48
QC_ESTD10000nM_LILY_rpMS1_posneg_1	PC	PC 34:1	ESTD	12	C42H82NO8P	NA	-1.40658	3237.41	NA	NA	NA	84.9997	-2.12067	2674.52	95.683	-1.78146	2958.8
QC_ESTD10000nM_LILY_rpMS1_posneg_1	PC	PC 34:2	ESTD	10.7	C42H80NO8P	NA	-0.55428	2107.74	NA	NA	NA	84.9997	0.730053	2774.45	95.683	0.648908	2666.31
QC_ESTD10000nM_LILY_rpMS1_posneg_1	PC	PC 34:3	Analyte	9.2	H78C42NO8P	NA	-3.22977	19.6188	NA	NA	NA	84.9997	-2.49798	37.6447	95.683	-2.01714	40.9187
QC_ESTD10000nM_LILY_rpMS1_posneg_1	PC	PC 34:4	Analyte	8.4	H76C42NO8P	NA	0.0455125	8.51613	NA	NA	NA	NA	NA	NA	95.683	3.79822	30.4943
QC_ESTD10000nM_LILY_rpMS1_posneg_1	PC	PC 35:0	Analyte	13.6	C43 H86 O8 N1 P1	NA	NA	62.451	NA	NA	NA	84.9997	NA	39.4667	95.683	NA	42.8632
QC_ESTD10000nM_LILY_rpMS1_posneg_1	PC	PC 35:2	Analyte	11.4	H82C43NO8P	NA	NA	NA	NA	NA	NA	NA	NA	NA	95.683	-2.52083	18.7638
QC_ESTD10000nM_LILY_rpMS1_posneg_1	PC	PC 35:4	Analyte	9.4	H78C43NO8P	NA	5.73919	44.8848	NA	NA	NA	84.9997	1.05188	33.992	95.683	-0.135175	52.5661
QC_ESTD10000nM_LILY_rpMS1_posneg_1	PC	PC 35:5	Analyte	8	H76C43NO8P	NA	NA	NA	NA	NA	NA	NA	NA	NA	95.683	-4.06069	17.9991
QC_ESTD10000nM_LILY_rpMS1_posneg_1	PC	PC 36:0	ESTD	14.1	H88C44NO8P	NA	NA	3451.3	NA	NA	NA	84.9997	-0.0242568	9141.76	95.683	-0.0953893	9850.59
QC_ESTD10000nM_LILY_rpMS1_posneg_1	PC	PC 36:1	ESTD	13.2	H86C44NO8P	NA	14.5145	25031.4	NA	NA	NA	84.9997	2.64183	11631.5	95.683	2.93474	10594.8
QC_ESTD10000nM_LILY_rpMS1_posneg_1	PC	PC 36:2	ESTD	12.4	C44H84NO8P	NA	3.24856	16792.1	NA	NA	NA	84.9997	1.05921	17832.1	95.683	3.66254	17784
QC_ESTD10000nM_LILY_rpMS1_posneg_1	PC	PC 36:3	Analyte	11.1	H82C44NO8P	NA	NA	NA	NA	NA	NA	NA	NA	NA	95.683	0.371101	104.711
QC_ESTD10000nM_LILY_rpMS1_posneg_1	PC	PC 36:5	Analyte	9	H78C44NO8P	NA	-1.21003	92.4192	NA	NA	NA	84.9997	0.024299	126.09	95.683	1.55178	178.958
QC_ESTD10000nM_LILY_rpMS1_posneg_1	PC	PC 37:4	Analyte	11.3	H82C45NO8P	NA	4.95631	25.1714	NA	NA	NA	NA	NA	NA	95.683	-2.19729	21.4513
QC_ESTD10000nM_LILY_rpMS1_posneg_1	PC	PC 37:6	Analyte	8.8	C45H78NO8P	NA	4.26435	16.6849	NA	NA	NA	NA	NA	NA	95.683	1.52533	30.0382
QC_ESTD10000nM_LILY_rpMS1_posneg_1	PC	PC 38:1	Analyte	14.1	C46 H90 O8 N1 P1	NA	NA	143.424	NA	NA	NA	84.9997	NA	75.6172	95.683	NA	76.4693
QC_ESTD10000nM_LILY_rpMS1_posneg_1	PC	PC 38:2	Analyte	13.3	C46 H88 O8 N1 P1	NA	NA	NA	NA	NA	NA	84.9997	10.8615	16.3495	95.683	30.3611	21.6292
QC_ESTD10000nM_LILY_rpMS1_posneg_1	PC	PC 38:4	ESTD	12.1	H84C46NO8P	NA	0.652788	6127.53	NA	NA	NA	84.9997	-1.08889	6807.72	95.683	0.634849	6236.69
QC_ESTD10000nM_LILY_rpMS1_posneg_1	PC	PC 38:6	ESTD	9.8	C46H80NO8P	NA	-2.71622	5858.72	NA	NA	NA	84.9997	3.19735	9685.11	95.683	3.80588	11444.2
QC_ESTD10000nM_LILY_rpMS1_posneg_1	PC	PC 40:0	ESTD	15.6	C48 H96 O8 N1 P1	NA	NA	3178.06	NA	NA	NA	NA	NA	NA	95.683	NA	9662.1
QC_ESTD10000nM_LILY_rpMS1_posneg_1	PC	PC 40:6	ESTD	11.7	C48H84NO8P	NA	0.494661	6420.63	NA	NA	NA	84.9997	-0.933534	5766.03	95.683	-0.0662809	6554.05
QC_ESTD10000nM_LILY_rpMS1_posneg_1	PC	PC 40:8	Analyte	8.5	C48H80NO8P	NA	3.41764	81.1818	NA	NA	NA	84.9997	1.02078	52.136	95.683	3.57037	80.2024
QC_ESTD10000nM_LILY_rpMS1_posneg_1	PE	PE 33:1	Analyte	11.8	H74C38NO8P	NA	NA	NA	201.817	NA	6.01801	NA	NA	NA	146.568	NA	4.2765
QC_ESTD10000nM_LILY_rpMS1_posneg_1	PE	PE 34:1	ESTD	12.5	C39H76NO8P	60.2939	4.20324	3145.93	201.817	9.11455	4722.45	116.707	2.72247	2178.58	146.568	2.06938	2067.23
QC_ESTD10000nM_LILY_rpMS1_posneg_1	PE	PE 36:2	ESTD	12.7	C41H78NO8P	60.2939	0.921812	5676.52	NA	NA	NA	NA	NA	NA	146.568	-1.78449	4645.17
QC_ESTD10000nM_LILY_rpMS1_posneg_1	PE	PE 36:4	Analyte	10	H74C41NO8P	NA	NA	NA	NA	NA	NA	NA	NA	NA	146.568	-6.96316	7.83737
QC_ESTD10000nM_LILY_rpMS1_posneg_1	PE	PE 38:4	Analyte	12.5	C43H78NO8P	NA	NA	NA	NA	NA	NA	NA	NA	NA	146.568	-0.66002	5.84708
QC_ESTD10000nM_LILY_rpMS1_posneg_1	PS	PS 36:2	ESTD	11.3	C42H78NO10P	NA	NA	NA	NA	NA	NA	NA	NA	11269.2	46.9951	NA	10973.1
QC_ESTD10000nM_LILY_rpMS1_posneg_1	SPH	SPH 18:1;2	ESTD	2.4	C18H37NO2	NA	NA	NA	NA	NA	NA	NA	NA	NA	NA	NA	32019.8
QC_ESTD10000nM_LILY_rpMS1_posneg_1	TG	TG 40:0	Analyte	16.3	C43H82O6	NA	NA	NA	NA	NA	NA	NA	NA	NA	186.613	NA	14.3831
QC_ESTD10000nM_LILY_rpMS1_posneg_1	TG	TG 42:0	ESTD	16.6	C45H86O6	42.3543	NA	1661.12	NA	NA	NA	NA	NA	NA	186.613	1.65906	9071.78
QC_ESTD10000nM_LILY_rpMS1_posneg_1	TG	TG 44:0	Analyte	16.9	C47H90O6	NA	NA	NA	NA	NA	NA	NA	NA	NA	186.613	NA	18.5883
QC_ESTD10000nM_LILY_rpMS1_posneg_1	TG	TG 46:0	Analyte	17.1	C49H94O6	42.3543	NA	28.3705	NA	NA	NA	NA	NA	NA	186.613	NA	51.0251
QC_ESTD10000nM_LILY_rpMS1_posneg_1	TG	TG 47:0	Analyte	17.2	C50H96O6	NA	NA	NA	NA	NA	NA	NA	NA	NA	186.613	NA	21.3825
QC_ESTD10000nM_LILY_rpMS1_posneg_1	TG	TG 48:0	ESTD	17.3	C51H98O6	42.3543	0.071354	1500.36	NA	NA	NA	NA	NA	NA	186.613	6.2825	8122.66
QC_ESTD10000nM_LILY_rpMS1_posneg_1	TG	TG 48:3	ESTD	16.7	C51H92O6	42.3543	NA	2208.25	NA	NA	NA	NA	NA	NA	186.613	NA	11710.6
QC_ESTD10000nM_LILY_rpMS1_posneg_1	TG	TG 48:4	Analyte	16.4	H90C51O6	NA	NA	NA	NA	NA	NA	NA	NA	NA	186.613	-0.594309	19.1086
QC_ESTD10000nM_LILY_rpMS1_posneg_1	TG	TG 52:7	Analyte	16.4	H92C55O6	NA	NA	NA	NA	NA	NA	NA	NA	NA	186.613	4.08732	10.6332
QC_ESTD10000nM_LILY_rpMS1_posneg_1	TG	TG 54:3	ESTD	17.3	C57H104O6	42.3543	-0.082833	11820	NA	NA	NA	NA	NA	NA	186.613	3.87911	31287.6
QC_ESTD10000nM_LILY_rpMS1_posneg_1	TG	TG 54:6	ESTD	16.8	C57H98O6	42.3543	-0.3399	3956.33	NA	NA	NA	NA	NA	NA	186.613	3.63039	10814
QC_ESTD10000nM_LILY_rpMS1_posneg_1	TG	TG 54:8	Analyte	16.4	H94C57O6	42.3543	NA	48.2662	NA	NA	NA	NA	NA	NA	186.613	NA	139.012
QC_ESTD10000nM_LILY_rpMS1_posneg_1	TG	TG 54:9	ESTD	16.1	C57H92O6	42.3543	NA	12776.1	NA	NA	NA	NA	NA	NA	186.613	NA	11147.2
QC_ESTD10000nM_LILY_rpMS1_posneg_1	TG	TG 60:3	ESTD	17.9	C63H116O6	42.3543	NA	1596.22	NA	NA	NA	NA	NA	NA	186.613	NA	9308.36
QC_ESTD10000nM_LILY_rpMS1_posneg_2	SE	CE 16:0	ESTD	18.2	C43H76O2	NA	NA	NA	NA	NA	NA	NA	NA	NA	25.2481	3.55126	9180.46
QC_ESTD10000nM_LILY_rpMS1_posneg_2	SE	CE 18:0	ESTD	18.6	C45H80O2	NA	NA	NA	NA	NA	NA	NA	NA	NA	25.2481	17.3164	8402.2
QC_ESTD10000nM_LILY_rpMS1_posneg_2	SE	CE 18:2	ESTD	17.9	C45H76O2	NA	NA	NA	NA	NA	NA	NA	NA	NA	25.2481	-1.13607	5618.12
QC_ESTD10000nM_LILY_rpMS1_posneg_2	SE	CE 18:3	Analyte	17.6	C45 H74 O2	NA	NA	NA	NA	NA	NA	NA	NA	NA	25.2481	0.000105709	160.424
QC_ESTD10000nM_LILY_rpMS1_posneg_2	Co	Co Q10	ESTD	16.8	C59H90O4	NA	NA	NA	NA	NA	NA	NA	NA	NA	NA	NA	9569.44
QC_ESTD10000nM_LILY_rpMS1_posneg_2	Co	Co Q9	Analyte	16.3	C54 H82 O4	NA	NA	NA	NA	NA	NA	NA	NA	NA	NA	NA	29.4054
QC_ESTD10000nM_LILY_rpMS1_posneg_2	DG	DG 30:0	Analyte	13.4	C33 H64 O5	NA	NA	NA	NA	NA	NA	NA	NA	NA	81.5706	-2.07379	24.3807
QC_ESTD10000nM_LILY_rpMS1_posneg_2	DG	DG 32:0	ESTD	14.4	C35H68O5	41.4932	-1.37416	6303.97	NA	NA	NA	NA	NA	NA	81.5706	-0.983759	7298.08
QC_ESTD10000nM_LILY_rpMS1_posneg_2	DG	DG 32:1	Analyte	13.5	C35H66O5	NA	NA	NA	NA	NA	NA	NA	NA	NA	81.5706	NA	20.8558
QC_ESTD10000nM_LILY_rpMS1_posneg_2	DG	DG 32:2	Analyte	12.5	H64C35O5	NA	NA	NA	NA	NA	NA	NA	NA	NA	81.5706	NA	10.7244
QC_ESTD10000nM_LILY_rpMS1_posneg_2	DG	DG 33:1	Analyte	14	C36 H68 O5	NA	NA	NA	NA	NA	NA	NA	NA	NA	81.5706	NA	28.3191
QC_ESTD10000nM_LILY_rpMS1_posneg_2	DG	DG 34:1	ESTD	14.4	C37H70O5	41.4932	-1.03827	8531.2	NA	NA	NA	NA	NA	NA	81.5706	-0.431748	10343.3
QC_ESTD10000nM_LILY_rpMS1_posneg_2	DG	DG 36:0	Analyte	15.8	C39H76O5	41.4932	NA	116.187	NA	NA	NA	NA	NA	NA	81.5706	NA	154.79
QC_ESTD10000nM_LILY_rpMS1_posneg_2	DG	DG 36:2	ESTD	14.5	C39H72O5	41.4932	-1.52589	6640.23	NA	NA	NA	NA	NA	NA	81.5706	-0.511262	10421.5
QC_ESTD10000nM_LILY_rpMS1_posneg_2	DG	DG 36:3	Analyte	13.7	H70C39O5	NA	NA	NA	NA	NA	NA	NA	NA	NA	81.5706	-0.958183	3.00238
QC_ESTD10000nM_LILY_rpMS1_posneg_2	DG	DG 38:2	Analyte	15.2	C41 H76 O5	NA	NA	NA	NA	NA	NA	NA	NA	NA	81.5706	NA	17.8661
QC_ESTD10000nM_LILY_rpMS1_posneg_2	DG	DG 38:4	ESTD	14.4	C41H72O5	41.4932	NA	7775.57	NA	NA	NA	NA	NA	NA	81.5706	NA	12198.6
QC_ESTD10000nM_LILY_rpMS1_posneg_2	DG	DG 40:6	ESTD	14.1	C43H72O5	41.4932	NA	8112.43	NA	NA	NA	NA	NA	NA	81.5706	NA	11172.9
QC_ESTD10000nM_LILY_rpMS1_posneg_2	HexCer	HexCer 34:1;2	ESTD	11.1	C40H77NO8	NA	NA	7819.44	NA	NA	NA	NA	NA	NA	NA	NA	21408.6
QC_ESTD10000nM_LILY_rpMS1_posneg_2	HexCer	HexCer 36:1;2	ESTD	12.6	C42H81NO8	NA	NA	3355.93	NA	NA	NA	NA	NA	NA	NA	NA	9244.18
QC_ESTD10000nM_LILY_rpMS1_posneg_2	HexCer	HexCer 38:1;2	Analyte	13.7	C44H85NO8	NA	NA	NA	NA	NA	NA	NA	NA	NA	NA	NA	42.6484
QC_ESTD10000nM_LILY_rpMS1_posneg_2	HexCer	HexCer 42:2;2	ESTD	14.5	C48 H91 O8 N1	NA	NA	4737.39	NA	NA	NA	NA	NA	NA	NA	NA	9753.17
QC_ESTD10000nM_LILY_rpMS1_posneg_2	LPC	LPC 14:0	Analyte	2.2	C22H46NO7P	NA	NA	NA	NA	NA	NA	NA	NA	NA	65.7659	1.93593	15.7301
QC_ESTD10000nM_LILY_rpMS1_posneg_2	LPC	LPC 15:0	Analyte	2.5	C23H48NO7P	286.248	12.4351	76.7244	NA	NA	NA	NA	NA	NA	65.7659	1.82031	29.492
QC_ESTD10000nM_LILY_rpMS1_posneg_2	LPC	LPC 16:0	ESTD	2.8	C24H50NO7P	286.248	25.2734	40185.4	NA	NA	NA	64.7639	-0.0675593	7423	65.7659	-0.229256	7288.22
QC_ESTD10000nM_LILY_rpMS1_posneg_2	LPC	LPC 17:0	Analyte	3.2	C25H52NO7P	NA	NA	NA	NA	NA	NA	NA	NA	NA	65.7659	0.914974	11.1074
QC_ESTD10000nM_LILY_rpMS1_posneg_2	LPC	LPC 18:1	Analyte	2.9	H52C26NO7P	286.248	30.7626	157.514	NA	NA	NA	64.7639	-1.07539	70.6998	65.7659	-1.00776	50.1569
QC_ESTD10000nM_LILY_rpMS1_posneg_2	LPC	LPC 18:3	Analyte	2.1	H48C26NO7P	NA	NA	NA	NA	NA	NA	NA	NA	NA	65.7659	6.10183	18.4125
QC_ESTD10000nM_LILY_rpMS1_posneg_2	LPC	LPC 20:4	Analyte	2.3	C28H50NO7P	NA	NA	NA	NA	NA	NA	64.7639	4.19949	68.6954	65.7659	5.87883	63.2433
QC_ESTD10000nM_LILY_rpMS1_posneg_2	LPC	LPC 22:6	Analyte	2.2	C30H50NO7P	NA	NA	NA	NA	NA	NA	NA	NA	NA	65.7659	9.47532	15.5407
QC_ESTD10000nM_LILY_rpMS1_posneg_2	LPE	LPE 18:0	ESTD	3.8	H48C23NO7P	NA	NA	NA	NA	NA	NA	107.506	0.708065	6944.41	100.734	0.827119	6338.39
QC_ESTD10000nM_LILY_rpMS1_posneg_2	PC	PC 30:0	Analyte	10.1	C38H76NO8P	NA	0.0074994	33.6951	NA	NA	NA	84.9997	-0.226819	41.3555	95.683	0.461465	43.3109
QC_ESTD10000nM_LILY_rpMS1_posneg_2	PC	PC 31:0	Analyte	11.1	C39H78NO8P	NA	13.7766	65.9908	NA	NA	NA	NA	NA	NA	95.683	5.86468	43.3856
QC_ESTD10000nM_LILY_rpMS1_posneg_2	PC	PC 32:0	ESTD	11.9	C40H80NO8P	NA	4.84221	4696.89	NA	NA	NA	84.9997	-1.82125	3810.13	95.683	-1.31431	4287.72
QC_ESTD10000nM_LILY_rpMS1_posneg_2	PC	PC 32:1	Analyte	10.3	H78C40NO8P	NA	NA	NA	NA	NA	NA	84.9997	-1.41756	232.073	95.683	0.174428	22.215
QC_ESTD10000nM_LILY_rpMS1_posneg_2	PC	PC 33:1	Analyte	11.2	H80C41NO8P	NA	18.7663	37.2668	NA	NA	NA	NA	NA	NA	95.683	6.2087	26.1221
QC_ESTD10000nM_LILY_rpMS1_posneg_2	PC	PC 34:0	ESTD	13.1	C42 H84 O8 N1 P1	NA	12.1794	12373.5	NA	NA	NA	84.9997	2.73633	4074.25	95.683	3.47542	5244.49
QC_ESTD10000nM_LILY_rpMS1_posneg_2	PC	PC 34:1	ESTD	12	C42H82NO8P	NA	-1.40658	3222.83	NA	NA	NA	84.9997	-2.12067	2591.68	95.683	-1.78146	2945.52
QC_ESTD10000nM_LILY_rpMS1_posneg_2	PC	PC 34:2	ESTD	10.7	C42H80NO8P	NA	-0.55428	2121.48	NA	NA	NA	84.9997	0.730053	2735.85	95.683	0.648908	2683.68
QC_ESTD10000nM_LILY_rpMS1_posneg_2	PC	PC 34:3	Analyte	9.2	H78C42NO8P	NA	-3.22977	20.1136	NA	NA	NA	84.9997	-2.49798	36.8354	95.683	-2.01714	41.7073
QC_ESTD10000nM_LILY_rpMS1_posneg_2	PC	PC 34:4	Analyte	8.4	H76C42NO8P	NA	0.0455125	7.88471	NA	NA	NA	NA	NA	NA	95.683	3.79822	29.525
QC_ESTD10000nM_LILY_rpMS1_posneg_2	PC	PC 35:0	Analyte	13.6	C43 H86 O8 N1 P1	NA	NA	50.5563	NA	NA	NA	84.9997	NA	31.3577	95.683	NA	37.3182
QC_ESTD10000nM_LILY_rpMS1_posneg_2	PC	PC 35:2	Analyte	11.4	H82C43NO8P	NA	NA	NA	NA	NA	NA	NA	NA	NA	95.683	-2.52083	18.7
QC_ESTD10000nM_LILY_rpMS1_posneg_2	PC	PC 35:4	Analyte	9.4	H78C43NO8P	NA	5.73919	56.8471	NA	NA	NA	84.9997	1.05188	37.56	95.683	-0.135175	61.6742
QC_ESTD10000nM_LILY_rpMS1_posneg_2	PC	PC 36:0	ESTD	14.1	H88C44NO8P	NA	NA	6218.14	NA	NA	NA	84.9997	-0.0242568	7954.79	95.683	-0.0953893	10809.5
QC_ESTD10000nM_LILY_rpMS1_posneg_2	PC	PC 36:1	ESTD	13.2	H86C44NO8P	NA	14.5145	27138.5	NA	NA	NA	84.9997	2.64183	9786.4	95.683	2.93474	11485.4
QC_ESTD10000nM_LILY_rpMS1_posneg_2	PC	PC 36:2	ESTD	12.4	C44H84NO8P	NA	3.24856	16639.7	NA	NA	NA	84.9997	1.05921	19216.5	95.683	3.66254	17619
QC_ESTD10000nM_LILY_rpMS1_posneg_2	PC	PC 36:3	Analyte	11.1	H82C44NO8P	NA	NA	NA	NA	NA	NA	NA	NA	NA	95.683	0.371101	103.589
QC_ESTD10000nM_LILY_rpMS1_posneg_2	PC	PC 36:5	Analyte	9	H78C44NO8P	NA	-1.21003	96.7861	NA	NA	NA	84.9997	0.024299	122.074	95.683	1.55178	186.187
QC_ESTD10000nM_LILY_rpMS1_posneg_2	PC	PC 37:4	Analyte	11.3	H82C45NO8P	NA	4.95631	22.8322	NA	NA	NA	NA	NA	NA	95.683	-2.19729	22.9615
QC_ESTD10000nM_LILY_rpMS1_posneg_2	PC	PC 37:6	Analyte	8.8	C45H78NO8P	NA	4.26435	23.8259	NA	NA	NA	NA	NA	NA	95.683	1.52533	35.3522
QC_ESTD10000nM_LILY_rpMS1_posneg_2	PC	PC 38:0	Analyte	14.9	C46 H92 O8 N1 P1	NA	NA	NA	NA	NA	NA	NA	NA	NA	95.683	NA	21.7549
QC_ESTD10000nM_LILY_rpMS1_posneg_2	PC	PC 38:1	Analyte	14.1	C46 H90 O8 N1 P1	NA	NA	153.285	NA	NA	NA	84.9997	NA	70.8732	95.683	NA	129.586
QC_ESTD10000nM_LILY_rpMS1_posneg_2	PC	PC 38:2	Analyte	13.3	C46 H88 O8 N1 P1	NA	NA	NA	NA	NA	NA	NA	NA	NA	95.683	30.3611	33.9235
QC_ESTD10000nM_LILY_rpMS1_posneg_2	PC	PC 38:4	ESTD	12.1	H84C46NO8P	NA	0.652788	6132.4	NA	NA	NA	84.9997	-1.08889	6818.81	95.683	0.634849	6241.97
QC_ESTD10000nM_LILY_rpMS1_posneg_2	PC	PC 38:5	Analyte	10.5	H82C46NO8P	NA	NA	NA	NA	NA	NA	NA	NA	NA	95.683	-1.0092	14.3134
QC_ESTD10000nM_LILY_rpMS1_posneg_2	PC	PC 38:6	ESTD	9.8	C46H80NO8P	NA	-2.71622	5480.44	NA	NA	NA	84.9997	3.19735	9353.74	95.683	3.80588	10709.6
QC_ESTD10000nM_LILY_rpMS1_posneg_2	PC	PC 40:0	ESTD	15.6	C48 H96 O8 N1 P1	NA	NA	3568.15	NA	NA	NA	NA	NA	NA	95.683	NA	16445
QC_ESTD10000nM_LILY_rpMS1_posneg_2	PC	PC 40:6	ESTD	11.7	C48H84NO8P	NA	0.494661	6071.6	NA	NA	NA	84.9997	-0.933534	6130.76	95.683	-0.0662809	6176.13
QC_ESTD10000nM_LILY_rpMS1_posneg_2	PC	PC 40:8	Analyte	8.5	C48H80NO8P	NA	3.41764	105.947	NA	NA	NA	84.9997	1.02078	58.5057	95.683	3.57037	99.0583
QC_ESTD10000nM_LILY_rpMS1_posneg_2	PE	PE 33:1	Analyte	11.8	H74C38NO8P	NA	NA	NA	201.817	NA	9.82375	NA	NA	NA	146.568	NA	3.99692
QC_ESTD10000nM_LILY_rpMS1_posneg_2	PE	PE 34:1	ESTD	12.5	C39H76NO8P	60.2939	4.20324	2981.64	201.817	9.11455	4158.76	116.707	2.72247	2147.05	146.568	2.06938	1959.72
QC_ESTD10000nM_LILY_rpMS1_posneg_2	PE	PE 36:2	ESTD	12.7	C41H78NO8P	60.2939	0.921812	5729.06	NA	NA	NA	NA	NA	NA	146.568	-1.78449	4688.56
QC_ESTD10000nM_LILY_rpMS1_posneg_2	PE	PE P-36:1	Analyte	14.1	C41H80NO7P	60.2939	1.67915	5.77532	NA	NA	NA	NA	NA	NA	146.568	-0.208772	7.10284
QC_ESTD10000nM_LILY_rpMS1_posneg_2	PS	PS 36:2	ESTD	11.3	C42H78NO10P	NA	NA	NA	NA	NA	NA	NA	NA	11009.5	46.9951	NA	10738.9
QC_ESTD10000nM_LILY_rpMS1_posneg_2	SPH	SPH 18:1;2	ESTD	2.4	C18H37NO2	NA	NA	NA	NA	NA	NA	NA	NA	NA	NA	NA	24855.2
QC_ESTD10000nM_LILY_rpMS1_posneg_2	TG	TG 40:0	Analyte	16.3	C43H82O6	NA	NA	NA	NA	NA	NA	NA	NA	NA	186.613	NA	10.8747
QC_ESTD10000nM_LILY_rpMS1_posneg_2	TG	TG 42:0	ESTD	16.6	C45H86O6	42.3543	NA	1628.79	NA	NA	NA	NA	NA	NA	186.613	1.65906	9806.04
QC_ESTD10000nM_LILY_rpMS1_posneg_2	TG	TG 44:0	Analyte	16.9	C47H90O6	NA	NA	NA	NA	NA	NA	NA	NA	NA	186.613	NA	18.2058
QC_ESTD10000nM_LILY_rpMS1_posneg_2	TG	TG 46:0	Analyte	17.1	C49H94O6	42.3543	NA	30.5058	NA	NA	NA	NA	NA	NA	186.613	NA	54.8461
QC_ESTD10000nM_LILY_rpMS1_posneg_2	TG	TG 47:0	Analyte	17.2	C50H96O6	NA	NA	NA	NA	NA	NA	NA	NA	NA	186.613	NA	18.8904
QC_ESTD10000nM_LILY_rpMS1_posneg_2	TG	TG 48:0	ESTD	17.3	C51H98O6	42.3543	0.071354	1428.53	NA	NA	NA	NA	NA	NA	186.613	6.2825	8509.97
QC_ESTD10000nM_LILY_rpMS1_posneg_2	TG	TG 48:3	ESTD	16.7	C51H92O6	42.3543	NA	2153.2	NA	NA	NA	NA	NA	NA	186.613	NA	8546.68
QC_ESTD10000nM_LILY_rpMS1_posneg_2	TG	TG 48:4	Analyte	16.4	H90C51O6	NA	NA	NA	NA	NA	NA	NA	NA	NA	186.613	-0.594309	23.1714
QC_ESTD10000nM_LILY_rpMS1_posneg_2	TG	TG 52:7	Analyte	16.4	H92C55O6	NA	NA	NA	NA	NA	NA	NA	NA	NA	186.613	4.08732	10.478
QC_ESTD10000nM_LILY_rpMS1_posneg_2	TG	TG 54:0	ESTD	18	C57H110O6	42.3543	NA	462.917	NA	NA	NA	NA	NA	NA	186.613	NA	1093.49
QC_ESTD10000nM_LILY_rpMS1_posneg_2	TG	TG 54:3	ESTD	17.3	C57H104O6	42.3543	-0.082833	13006.4	NA	NA	NA	NA	NA	NA	186.613	3.87911	34443.1
QC_ESTD10000nM_LILY_rpMS1_posneg_2	TG	TG 54:6	ESTD	16.8	C57H98O6	42.3543	-0.3399	3910.19	NA	NA	NA	NA	NA	NA	186.613	3.63039	10687
QC_ESTD10000nM_LILY_rpMS1_posneg_2	TG	TG 54:8	Analyte	16.4	H94C57O6	42.3543	NA	46.9599	NA	NA	NA	NA	NA	NA	186.613	NA	135.152
QC_ESTD10000nM_LILY_rpMS1_posneg_2	TG	TG 54:9	ESTD	16.1	C57H92O6	42.3543	NA	12137.2	NA	NA	NA	NA	NA	NA	186.613	NA	10589.1
QC_ESTD10000nM_LILY_rpMS1_posneg_2	TG	TG 60:3	ESTD	17.9	C63H116O6	42.3543	NA	1548.52	NA	NA	NA	NA	NA	NA	186.613	NA	9457.76
QC_ESTD10000nM_LILY_rpMS1_posneg_3	SE	CE 16:0	ESTD	18.2	C43H76O2	NA	NA	NA	NA	NA	NA	NA	NA	NA	25.2481	3.55126	12551.3
QC_ESTD10000nM_LILY_rpMS1_posneg_3	SE	CE 18:0	ESTD	18.6	C45H80O2	NA	NA	NA	NA	NA	NA	NA	NA	NA	25.2481	17.3164	12013.6
QC_ESTD10000nM_LILY_rpMS1_posneg_3	SE	CE 18:2	ESTD	17.9	C45H76O2	NA	NA	NA	NA	NA	NA	NA	NA	NA	25.2481	-1.13607	6476.22
QC_ESTD10000nM_LILY_rpMS1_posneg_3	SE	CE 18:3	Analyte	17.6	C45 H74 O2	NA	NA	NA	NA	NA	NA	NA	NA	NA	25.2481	0.000105709	164.376
QC_ESTD10000nM_LILY_rpMS1_posneg_3	Cer	Cer 36:1;2	ESTD	13.7	C36H71NO3	NA	NA	NA	NA	NA	NA	NA	1.19393	11306.1	NA	NA	10573.7
QC_ESTD10000nM_LILY_rpMS1_posneg_3	Cer	Cer 40:1;2	Analyte	15.4	C40H79NO3	NA	NA	NA	NA	NA	NA	NA	4.11885	39.491	NA	5.90022	46.5298
QC_ESTD10000nM_LILY_rpMS1_posneg_3	Cer	Cer 41:1;2	Analyte	15.7	C41H81NO3	NA	NA	NA	NA	NA	NA	NA	1.48689	25.5665	NA	2.01472	65.6193
QC_ESTD10000nM_LILY_rpMS1_posneg_3	Cer	Cer 42:0;2	ESTD	16.1	C42H85NO3	NA	NA	NA	NA	NA	NA	NA	NA	15312	NA	NA	17688.1
QC_ESTD10000nM_LILY_rpMS1_posneg_3	Cer	Cer 42:1;2	ESTD	16	C42H83NO3	NA	NA	NA	NA	NA	NA	NA	5.34878	10612.5	NA	7.05206	14221.3
QC_ESTD10000nM_LILY_rpMS1_posneg_3	Cer	Cer 42:2;2	ESTD	15.4	C42H81NO3	NA	NA	NA	NA	NA	NA	NA	1.60065	11695.5	NA	0.292781	14639.5
QC_ESTD10000nM_LILY_rpMS1_posneg_3	Cer	Cer 42:3;2	Analyte	14.7	C42H79NO3	NA	NA	NA	NA	NA	NA	NA	NA	46.9631	NA	NA	9.4328
QC_ESTD10000nM_LILY_rpMS1_posneg_3	Co	Co Q10	ESTD	16.8	C59H90O4	NA	NA	NA	NA	NA	NA	NA	NA	NA	NA	NA	10259.4
QC_ESTD10000nM_LILY_rpMS1_posneg_3	Co	Co Q9	Analyte	16.3	C54 H82 O4	NA	NA	NA	NA	NA	NA	NA	NA	NA	NA	NA	31.4314
QC_ESTD10000nM_LILY_rpMS1_posneg_3	DG	DG 30:0	Analyte	13.4	C33 H64 O5	NA	NA	NA	NA	NA	NA	NA	NA	NA	81.5706	-2.07379	24.7742
QC_ESTD10000nM_LILY_rpMS1_posneg_3	DG	DG 32:0	ESTD	14.4	C35H68O5	41.4932	-1.37416	7038.61	NA	NA	NA	NA	NA	NA	81.5706	-0.983759	7210.58
QC_ESTD10000nM_LILY_rpMS1_posneg_3	DG	DG 32:1	Analyte	13.5	C35H66O5	NA	NA	NA	NA	NA	NA	NA	NA	NA	81.5706	NA	20.7961
QC_ESTD10000nM_LILY_rpMS1_posneg_3	DG	DG 32:2	Analyte	12.5	H64C35O5	NA	NA	NA	NA	NA	NA	NA	NA	NA	81.5706	NA	12.6505
QC_ESTD10000nM_LILY_rpMS1_posneg_3	DG	DG 33:1	Analyte	14	C36 H68 O5	NA	NA	NA	NA	NA	NA	NA	NA	NA	81.5706	NA	26.1469
QC_ESTD10000nM_LILY_rpMS1_posneg_3	DG	DG 34:0	Analyte	15.2	C37H72O5	41.4932	NA	83.9933	NA	NA	NA	NA	NA	NA	81.5706	NA	173.196
QC_ESTD10000nM_LILY_rpMS1_posneg_3	DG	DG 34:1	ESTD	14.4	C37H70O5	41.4932	-1.03827	8829.37	NA	NA	NA	NA	NA	NA	81.5706	-0.431748	10702.9
QC_ESTD10000nM_LILY_rpMS1_posneg_3	DG	DG 36:0	Analyte	15.8	C39H76O5	41.4932	NA	122.726	NA	NA	NA	NA	NA	NA	81.5706	NA	162.252
QC_ESTD10000nM_LILY_rpMS1_posneg_3	DG	DG 36:1	Analyte	15.2	H74C39O5	NA	NA	NA	NA	NA	NA	NA	NA	NA	81.5706	NA	16.7965
QC_ESTD10000nM_LILY_rpMS1_posneg_3	DG	DG 36:2	ESTD	14.5	C39H72O5	41.4932	-1.52589	6394.98	NA	NA	NA	NA	NA	NA	81.5706	-0.511262	10037.7
QC_ESTD10000nM_LILY_rpMS1_posneg_3	DG	DG 38:2	Analyte	15.2	C41 H76 O5	NA	NA	NA	NA	NA	NA	NA	NA	NA	81.5706	NA	17.2208
QC_ESTD10000nM_LILY_rpMS1_posneg_3	DG	DG 38:3	Analyte	14.6	C41 H74 O5	41.4932	NA	34.0964	NA	NA	NA	NA	NA	NA	81.5706	NA	69.1625
QC_ESTD10000nM_LILY_rpMS1_posneg_3	DG	DG 38:4	ESTD	14.4	C41H72O5	41.4932	NA	7717.34	NA	NA	NA	NA	NA	NA	81.5706	NA	12107.5
QC_ESTD10000nM_LILY_rpMS1_posneg_3	DG	DG 40:6	ESTD	14.1	C43H72O5	41.4932	NA	7583.52	NA	NA	NA	NA	NA	NA	81.5706	NA	10449.6
QC_ESTD10000nM_LILY_rpMS1_posneg_3	HexCer	HexCer 34:1;2	ESTD	11.1	C40H77NO8	NA	NA	8776.93	NA	NA	NA	NA	NA	NA	NA	NA	24140.8
QC_ESTD10000nM_LILY_rpMS1_posneg_3	HexCer	HexCer 36:1;2	ESTD	12.6	C42H81NO8	NA	NA	3271.75	NA	NA	NA	NA	NA	NA	NA	NA	9579.76
QC_ESTD10000nM_LILY_rpMS1_posneg_3	HexCer	HexCer 38:1;2	Analyte	13.7	C44H85NO8	NA	NA	NA	NA	NA	NA	NA	NA	NA	NA	NA	43.8416
QC_ESTD10000nM_LILY_rpMS1_posneg_3	HexCer	HexCer 42:2;2	ESTD	14.5	C48 H91 O8 N1	NA	NA	5189.94	NA	NA	NA	NA	NA	NA	NA	NA	9635.1
QC_ESTD10000nM_LILY_rpMS1_posneg_3	LPC	LPC 14:0	Analyte	2.2	C22H46NO7P	NA	NA	NA	NA	NA	NA	NA	NA	NA	65.7659	1.93593	17.4238
QC_ESTD10000nM_LILY_rpMS1_posneg_3	LPC	LPC 15:0	Analyte	2.5	C23H48NO7P	NA	NA	NA	NA	NA	NA	NA	NA	NA	65.7659	1.82031	21.9758
QC_ESTD10000nM_LILY_rpMS1_posneg_3	LPC	LPC 16:0	ESTD	2.8	C24H50NO7P	286.248	25.2734	38076.8	NA	NA	NA	64.7639	-0.0675593	7354.16	65.7659	-0.229256	6570.29
QC_ESTD10000nM_LILY_rpMS1_posneg_3	LPC	LPC 17:0	Analyte	3.2	C25H52NO7P	NA	NA	NA	NA	NA	NA	NA	NA	NA	65.7659	0.914974	10.418
QC_ESTD10000nM_LILY_rpMS1_posneg_3	LPC	LPC 18:0	ESTD	3.6	C26H54NO7P	286.248	29.2932	26531.4	NA	NA	NA	64.7639	-1.52189	4345.53	65.7659	1.6445	6560.26
QC_ESTD10000nM_LILY_rpMS1_posneg_3	LPC	LPC 18:1	Analyte	2.9	H52C26NO7P	286.248	30.7626	136.278	NA	NA	NA	64.7639	-1.07539	69.7583	65.7659	-1.00776	42.8276
QC_ESTD10000nM_LILY_rpMS1_posneg_3	LPC	LPC 18:2	Analyte	2.4	H50C26NO7P	NA	NA	NA	NA	NA	NA	NA	NA	NA	65.7659	0.28858	14.8219
QC_ESTD10000nM_LILY_rpMS1_posneg_3	LPC	LPC 18:3	Analyte	2.1	H48C26NO7P	NA	NA	NA	NA	NA	NA	NA	NA	NA	65.7659	6.10183	18.6592
QC_ESTD10000nM_LILY_rpMS1_posneg_3	LPC	LPC 20:4	Analyte	2.3	C28H50NO7P	NA	NA	NA	NA	NA	NA	64.7639	4.19949	67.9499	65.7659	5.87883	59.1979
QC_ESTD10000nM_LILY_rpMS1_posneg_3	LPC	LPC 22:6	Analyte	2.2	C30H50NO7P	NA	NA	NA	NA	NA	NA	NA	NA	NA	65.7659	9.47532	12.8491
QC_ESTD10000nM_LILY_rpMS1_posneg_3	LPE	LPE 18:0	ESTD	3.8	H48C23NO7P	NA	NA	NA	NA	NA	NA	107.506	0.708065	7139.65	100.734	0.827119	6266.8
QC_ESTD10000nM_LILY_rpMS1_posneg_3	PC	PC 30:0	Analyte	10.1	C38H76NO8P	NA	0.0074994	34.6072	NA	NA	NA	84.9997	-0.226819	43.3645	95.683	0.461465	44.2266
QC_ESTD10000nM_LILY_rpMS1_posneg_3	PC	PC 31:0	Analyte	11.1	C39H78NO8P	NA	13.7766	67.2247	NA	NA	NA	NA	NA	NA	95.683	5.86468	43.9831
QC_ESTD10000nM_LILY_rpMS1_posneg_3	PC	PC 32:0	ESTD	11.9	C40H80NO8P	NA	4.84221	4453.64	NA	NA	NA	NA	NA	NA	95.683	-1.31431	4066.23
QC_ESTD10000nM_LILY_rpMS1_posneg_3	PC	PC 32:1	Analyte	10.3	H78C40NO8P	NA	NA	NA	NA	NA	NA	84.9997	-1.41756	241.842	95.683	0.174428	20.1857
QC_ESTD10000nM_LILY_rpMS1_posneg_3	PC	PC 33:1	Analyte	11.2	H80C41NO8P	NA	18.7663	34.9493	NA	NA	NA	NA	NA	NA	95.683	6.2087	25.7079
QC_ESTD10000nM_LILY_rpMS1_posneg_3	PC	PC 34:0	ESTD	13.1	C42 H84 O8 N1 P1	NA	12.1794	11745.6	NA	NA	NA	84.9997	2.73633	5252.33	95.683	3.47542	4979.09
QC_ESTD10000nM_LILY_rpMS1_posneg_3	PC	PC 34:1	ESTD	12	C42H82NO8P	NA	-1.40658	3147.81	NA	NA	NA	NA	NA	NA	95.683	-1.78146	2877.21
QC_ESTD10000nM_LILY_rpMS1_posneg_3	PC	PC 34:2	ESTD	10.7	C42H80NO8P	NA	-0.55428	2127.6	NA	NA	NA	84.9997	0.730053	2747.92	95.683	0.648908	2691.42
QC_ESTD10000nM_LILY_rpMS1_posneg_3	PC	PC 34:3	Analyte	9.2	H78C42NO8P	NA	-3.22977	19.1922	NA	NA	NA	84.9997	-2.49798	38.0629	95.683	-2.01714	40.2386
QC_ESTD10000nM_LILY_rpMS1_posneg_3	PC	PC 34:4	Analyte	8.4	H76C42NO8P	NA	0.0455125	8.30326	NA	NA	NA	NA	NA	NA	95.683	3.79822	30.1675
QC_ESTD10000nM_LILY_rpMS1_posneg_3	PC	PC 35:0	Analyte	13.6	C43 H86 O8 N1 P1	NA	NA	62.627	NA	NA	NA	84.9997	NA	37.4985	95.683	NA	42.9452
QC_ESTD10000nM_LILY_rpMS1_posneg_3	PC	PC 35:2	Analyte	11.4	H82C43NO8P	NA	NA	NA	NA	NA	NA	NA	NA	NA	95.683	-2.52083	18.6418
QC_ESTD10000nM_LILY_rpMS1_posneg_3	PC	PC 35:4	Analyte	9.4	H78C43NO8P	NA	5.73919	43.0391	NA	NA	NA	84.9997	1.05188	36.6487	95.683	-0.135175	51.1608
QC_ESTD10000nM_LILY_rpMS1_posneg_3	PC	PC 36:0	ESTD	14.1	H88C44NO8P	NA	NA	3699.65	NA	NA	NA	84.9997	-0.0242568	9776.22	95.683	-0.0953893	9510.28
QC_ESTD10000nM_LILY_rpMS1_posneg_3	PC	PC 36:1	ESTD	13.2	H86C44NO8P	NA	14.5145	24966.3	NA	NA	NA	84.9997	2.64183	11150.2	95.683	2.93474	10567.3
QC_ESTD10000nM_LILY_rpMS1_posneg_3	PC	PC 36:2	ESTD	12.4	C44H84NO8P	NA	3.24856	17406.5	NA	NA	NA	84.9997	1.05921	18333.2	95.683	3.66254	18449.2
QC_ESTD10000nM_LILY_rpMS1_posneg_3	PC	PC 36:3	Analyte	11.1	H82C44NO8P	NA	NA	NA	NA	NA	NA	NA	NA	NA	95.683	0.371101	101.49
QC_ESTD10000nM_LILY_rpMS1_posneg_3	PC	PC 36:5	Analyte	9	H78C44NO8P	NA	-1.21003	95.3384	NA	NA	NA	84.9997	0.024299	118.986	95.683	1.55178	183.791
QC_ESTD10000nM_LILY_rpMS1_posneg_3	PC	PC 37:4	Analyte	11.3	H82C45NO8P	NA	4.95631	25.6179	NA	NA	NA	NA	NA	NA	95.683	-2.19729	21.3337
QC_ESTD10000nM_LILY_rpMS1_posneg_3	PC	PC 37:6	Analyte	8.8	C45H78NO8P	NA	4.26435	17.3334	NA	NA	NA	NA	NA	NA	95.683	1.52533	30.5208
QC_ESTD10000nM_LILY_rpMS1_posneg_3	PC	PC 38:0	Analyte	14.9	C46 H92 O8 N1 P1	NA	NA	NA	NA	NA	NA	NA	NA	NA	95.683	NA	43.8271
QC_ESTD10000nM_LILY_rpMS1_posneg_3	PC	PC 38:1	Analyte	14.1	C46 H90 O8 N1 P1	NA	NA	135.94	NA	NA	NA	84.9997	NA	76.6758	95.683	NA	170.369
QC_ESTD10000nM_LILY_rpMS1_posneg_3	PC	PC 38:2	Analyte	13.3	C46 H88 O8 N1 P1	NA	NA	NA	NA	NA	NA	NA	NA	NA	95.683	30.3611	46.3699
QC_ESTD10000nM_LILY_rpMS1_posneg_3	PC	PC 38:4	ESTD	12.1	H84C46NO8P	NA	0.652788	6348.43	NA	NA	NA	84.9997	-1.08889	7117.17	95.683	0.634849	6475.87
QC_ESTD10000nM_LILY_rpMS1_posneg_3	PC	PC 38:6	ESTD	9.8	C46H80NO8P	NA	-2.71622	5444.96	NA	NA	NA	84.9997	3.19735	9657.93	95.683	3.80588	10640.7
QC_ESTD10000nM_LILY_rpMS1_posneg_3	PC	PC 40:0	ESTD	15.6	C48 H96 O8 N1 P1	NA	NA	3564.2	NA	NA	NA	NA	NA	NA	95.683	NA	22491.2
QC_ESTD10000nM_LILY_rpMS1_posneg_3	PC	PC 40:6	ESTD	11.7	C48H84NO8P	NA	0.494661	7071.37	NA	NA	NA	84.9997	-0.933534	5531.31	95.683	-0.0662809	7258.65
QC_ESTD10000nM_LILY_rpMS1_posneg_3	PC	PC 40:8	Analyte	8.5	C48H80NO8P	NA	3.41764	76.7908	NA	NA	NA	84.9997	1.02078	54.2108	95.683	3.57037	76.8591
QC_ESTD10000nM_LILY_rpMS1_posneg_3	PC	PC P-36:3	Analyte	11.6	C44H82NO7P	NA	NA	NA	NA	NA	NA	NA	NA	NA	95.683	-0.135175	8.24636
QC_ESTD10000nM_LILY_rpMS1_posneg_3	PE	PE 33:1	Analyte	11.8	H74C38NO8P	NA	NA	NA	NA	NA	NA	NA	NA	NA	146.568	NA	4.601
QC_ESTD10000nM_LILY_rpMS1_posneg_3	PE	PE 34:1	ESTD	12.5	C39H76NO8P	60.2939	4.20324	3311.57	201.817	9.11455	4770.62	116.707	2.72247	2179.41	146.568	2.06938	2175.62
QC_ESTD10000nM_LILY_rpMS1_posneg_3	PE	PE 36:2	ESTD	12.7	C41H78NO8P	60.2939	0.921812	5593.29	NA	NA	NA	NA	NA	NA	146.568	-1.78449	4576.45
QC_ESTD10000nM_LILY_rpMS1_posneg_3	PE	PE 36:4	Analyte	10	H74C41NO8P	NA	NA	NA	NA	NA	NA	NA	NA	NA	146.568	-6.96316	6.58755
QC_ESTD10000nM_LILY_rpMS1_posneg_3	PS	PS 36:2	ESTD	11.3	C42H78NO10P	NA	NA	NA	NA	NA	NA	NA	NA	11746.9	46.9951	NA	12278.5
QC_ESTD10000nM_LILY_rpMS1_posneg_3	SPH	SPH 18:1;2	ESTD	2.4	C18H37NO2	NA	NA	NA	NA	NA	NA	NA	NA	NA	NA	NA	16196.9
QC_ESTD10000nM_LILY_rpMS1_posneg_3	TG	TG 40:0	Analyte	16.3	C43H82O6	NA	NA	NA	NA	NA	NA	NA	NA	NA	186.613	NA	13.3305
QC_ESTD10000nM_LILY_rpMS1_posneg_3	TG	TG 42:0	ESTD	16.6	C45H86O6	42.3543	NA	2201.08	NA	NA	NA	NA	NA	NA	186.613	1.65906	10988.1
QC_ESTD10000nM_LILY_rpMS1_posneg_3	TG	TG 44:0	Analyte	16.9	C47H90O6	NA	NA	NA	NA	NA	NA	NA	NA	NA	186.613	NA	17.8225
QC_ESTD10000nM_LILY_rpMS1_posneg_3	TG	TG 46:0	Analyte	17.1	C49H94O6	42.3543	NA	27.0419	NA	NA	NA	NA	NA	NA	186.613	NA	52.726
QC_ESTD10000nM_LILY_rpMS1_posneg_3	TG	TG 47:0	Analyte	17.2	C50H96O6	NA	NA	NA	NA	NA	NA	NA	NA	NA	186.613	NA	22.0375
QC_ESTD10000nM_LILY_rpMS1_posneg_3	TG	TG 48:0	ESTD	17.3	C51H98O6	42.3543	0.071354	1613.74	NA	NA	NA	NA	NA	NA	186.613	6.2825	9515.29
QC_ESTD10000nM_LILY_rpMS1_posneg_3	TG	TG 48:3	ESTD	16.7	C51H92O6	42.3543	NA	2414.65	NA	NA	NA	NA	NA	NA	186.613	NA	12717.4
QC_ESTD10000nM_LILY_rpMS1_posneg_3	TG	TG 48:4	Analyte	16.4	H90C51O6	NA	NA	NA	NA	NA	NA	NA	NA	NA	186.613	-0.594309	22.4491
QC_ESTD10000nM_LILY_rpMS1_posneg_3	TG	TG 52:7	Analyte	16.4	H92C55O6	NA	NA	NA	NA	NA	NA	NA	NA	NA	186.613	4.08732	10.5328
QC_ESTD10000nM_LILY_rpMS1_posneg_3	TG	TG 54:0	ESTD	18	C57H110O6	42.3543	NA	434.829	NA	NA	NA	NA	NA	NA	186.613	NA	1086.51
QC_ESTD10000nM_LILY_rpMS1_posneg_3	TG	TG 54:3	ESTD	17.3	C57H104O6	42.3543	-0.082833	11878.3	NA	NA	NA	NA	NA	NA	186.613	3.87911	31442.8
QC_ESTD10000nM_LILY_rpMS1_posneg_3	TG	TG 54:6	ESTD	16.8	C57H98O6	42.3543	-0.3399	4337.63	NA	NA	NA	NA	NA	NA	186.613	3.63039	11863.4
QC_ESTD10000nM_LILY_rpMS1_posneg_3	TG	TG 54:8	Analyte	16.4	H94C57O6	42.3543	NA	48.1125	NA	NA	NA	NA	NA	NA	186.613	NA	138.557
QC_ESTD10000nM_LILY_rpMS1_posneg_3	TG	TG 54:9	ESTD	16.1	C57H92O6	42.3543	NA	12861	NA	NA	NA	NA	NA	NA	186.613	NA	11221.3
QC_ESTD10000nM_LILY_rpMS1_posneg_3	TG	TG 60:3	ESTD	17.9	C63H116O6	42.3543	NA	1823.7	NA	NA	NA	NA	NA	NA	186.613	NA	9397.72
QC_ESTD10000nM_LILY_rpMS1_posneg_3	TG	TG 60:9	Analyte	17	C63 H104 O6	NA	NA	NA	NA	NA	NA	NA	NA	NA	186.613	NA	10.6875
QC_ESTD10000nM_LILY_rpMS1_posneg_3	TG	TG 66:3	ESTD	18.6	C69H128O6	42.3543	NA	5357.38	NA	NA	NA	NA	NA	NA	186.613	NA	11686.9
QC_ESTD10000nM_LILY_rpMS1_posneg_4	SE	CE 16:0	ESTD	18.2	C43H76O2	NA	NA	NA	NA	NA	NA	NA	NA	NA	25.2481	3.55126	9210.02
QC_ESTD10000nM_LILY_rpMS1_posneg_4	SE	CE 18:0	ESTD	18.6	C45H80O2	NA	NA	NA	NA	NA	NA	NA	NA	NA	25.2481	17.3164	8666.61
QC_ESTD10000nM_LILY_rpMS1_posneg_4	SE	CE 18:2	ESTD	17.9	C45H76O2	NA	NA	NA	NA	NA	NA	NA	NA	NA	25.2481	-1.13607	5965.93
QC_ESTD10000nM_LILY_rpMS1_posneg_4	SE	CE 18:3	Analyte	17.6	C45 H74 O2	NA	NA	NA	NA	NA	NA	NA	NA	NA	25.2481	0.000105709	153.312
QC_ESTD10000nM_LILY_rpMS1_posneg_4	Cer	Cer 36:1;2	ESTD	13.7	C36H71NO3	NA	NA	NA	NA	NA	NA	NA	1.19393	16711.3	NA	NA	11099.4
QC_ESTD10000nM_LILY_rpMS1_posneg_4	Cer	Cer 40:1;2	Analyte	15.4	C40H79NO3	NA	NA	NA	NA	NA	NA	NA	4.11885	62.0026	NA	5.90022	51.4864
QC_ESTD10000nM_LILY_rpMS1_posneg_4	Cer	Cer 41:1;2	Analyte	15.7	C41H81NO3	NA	NA	NA	NA	NA	NA	NA	1.48689	35.3721	NA	2.01472	64.5293
QC_ESTD10000nM_LILY_rpMS1_posneg_4	Cer	Cer 42:0;2	ESTD	16.1	C42H85NO3	NA	NA	NA	NA	NA	NA	NA	NA	22862	NA	NA	17224.8
QC_ESTD10000nM_LILY_rpMS1_posneg_4	Cer	Cer 42:1;2	ESTD	16	C42H83NO3	NA	NA	NA	NA	NA	NA	NA	5.34878	15310.9	NA	7.05206	15107.7
QC_ESTD10000nM_LILY_rpMS1_posneg_4	Cer	Cer 42:2;2	ESTD	15.4	C42H81NO3	NA	NA	NA	NA	NA	NA	NA	1.60065	17467.4	NA	0.292781	15384.2
QC_ESTD10000nM_LILY_rpMS1_posneg_4	Cer	Cer 42:3;2	Analyte	14.7	C42H79NO3	NA	NA	NA	NA	NA	NA	NA	NA	80.6815	NA	NA	12.8156
QC_ESTD10000nM_LILY_rpMS1_posneg_4	Co	Co Q10	ESTD	16.8	C59H90O4	NA	NA	NA	NA	NA	NA	NA	NA	NA	NA	NA	7154.61
QC_ESTD10000nM_LILY_rpMS1_posneg_4	Co	Co Q9	Analyte	16.3	C54 H82 O4	NA	NA	NA	NA	NA	NA	NA	NA	NA	NA	NA	20.9179
QC_ESTD10000nM_LILY_rpMS1_posneg_4	DG	DG 30:0	Analyte	13.4	C33 H64 O5	NA	NA	NA	NA	NA	NA	NA	NA	NA	81.5706	-2.07379	23.7064
QC_ESTD10000nM_LILY_rpMS1_posneg_4	DG	DG 32:0	ESTD	14.4	C35H68O5	41.4932	-1.37416	6083.73	NA	NA	NA	NA	NA	NA	81.5706	-0.983759	15279.3
QC_ESTD10000nM_LILY_rpMS1_posneg_4	DG	DG 32:1	Analyte	13.5	C35H66O5	NA	NA	NA	NA	NA	NA	NA	NA	NA	81.5706	NA	21.2592
QC_ESTD10000nM_LILY_rpMS1_posneg_4	DG	DG 32:2	Analyte	12.5	H64C35O5	NA	NA	NA	NA	NA	NA	NA	NA	NA	81.5706	NA	10.9159
QC_ESTD10000nM_LILY_rpMS1_posneg_4	DG	DG 33:1	Analyte	14	C36 H68 O5	NA	NA	NA	NA	NA	NA	NA	NA	NA	81.5706	NA	37.9202
QC_ESTD10000nM_LILY_rpMS1_posneg_4	DG	DG 34:0	Analyte	15.2	C37H72O5	41.4932	NA	87.7877	NA	NA	NA	NA	NA	NA	81.5706	NA	151.362
QC_ESTD10000nM_LILY_rpMS1_posneg_4	DG	DG 34:1	ESTD	14.4	C37H70O5	41.4932	-1.03827	8048.03	NA	NA	NA	NA	NA	NA	81.5706	-0.431748	9760.6
QC_ESTD10000nM_LILY_rpMS1_posneg_4	DG	DG 36:0	Analyte	15.8	C39H76O5	41.4932	NA	143.194	NA	NA	NA	NA	NA	NA	81.5706	NA	185.61
QC_ESTD10000nM_LILY_rpMS1_posneg_4	DG	DG 36:1	Analyte	15.2	H74C39O5	NA	NA	NA	NA	NA	NA	NA	NA	NA	81.5706	NA	16.6233
QC_ESTD10000nM_LILY_rpMS1_posneg_4	DG	DG 36:2	ESTD	14.5	C39H72O5	41.4932	-1.52589	6880.35	NA	NA	NA	NA	NA	NA	81.5706	-0.511262	10797.4
QC_ESTD10000nM_LILY_rpMS1_posneg_4	DG	DG 36:3	Analyte	13.7	H70C39O5	NA	NA	NA	NA	NA	NA	NA	NA	NA	81.5706	-0.958183	5.52045
QC_ESTD10000nM_LILY_rpMS1_posneg_4	DG	DG 38:2	Analyte	15.2	C41 H76 O5	NA	NA	NA	NA	NA	NA	NA	NA	NA	81.5706	NA	19.1838
QC_ESTD10000nM_LILY_rpMS1_posneg_4	DG	DG 38:3	Analyte	14.6	C41 H74 O5	41.4932	NA	34.6108	NA	NA	NA	NA	NA	NA	81.5706	NA	70.0599
QC_ESTD10000nM_LILY_rpMS1_posneg_4	DG	DG 38:4	ESTD	14.4	C41H72O5	41.4932	NA	7920.92	NA	NA	NA	NA	NA	NA	81.5706	NA	12426.1
QC_ESTD10000nM_LILY_rpMS1_posneg_4	DG	DG 40:6	ESTD	14.1	C43H72O5	41.4932	NA	8464.18	NA	NA	NA	NA	NA	NA	81.5706	NA	11654
QC_ESTD10000nM_LILY_rpMS1_posneg_4	HexCer	HexCer 34:1;2	ESTD	11.1	C40H77NO8	NA	NA	7278.7	NA	NA	NA	NA	NA	NA	NA	NA	19865.6
QC_ESTD10000nM_LILY_rpMS1_posneg_4	HexCer	HexCer 36:1;2	ESTD	12.6	C42H81NO8	NA	NA	3053.11	NA	NA	NA	NA	NA	NA	NA	NA	13254.2
QC_ESTD10000nM_LILY_rpMS1_posneg_4	HexCer	HexCer 38:1;2	Analyte	13.7	C44H85NO8	NA	NA	NA	NA	NA	NA	NA	NA	NA	NA	NA	47.7955
QC_ESTD10000nM_LILY_rpMS1_posneg_4	HexCer	HexCer 42:2;2	ESTD	14.5	C48 H91 O8 N1	NA	NA	5030.24	NA	NA	NA	NA	NA	NA	NA	NA	10817.1
QC_ESTD10000nM_LILY_rpMS1_posneg_4	LPC	LPC 14:0	Analyte	2.2	C22H46NO7P	NA	NA	NA	NA	NA	NA	NA	NA	NA	65.7659	1.93593	16.6796
QC_ESTD10000nM_LILY_rpMS1_posneg_4	LPC	LPC 15:0	Analyte	2.5	C23H48NO7P	286.248	12.4351	73.547	NA	NA	NA	NA	NA	NA	65.7659	1.82031	21.1263
QC_ESTD10000nM_LILY_rpMS1_posneg_4	LPC	LPC 16:0	ESTD	2.8	C24H50NO7P	286.248	25.2734	44185.1	NA	NA	NA	64.7639	-0.0675593	6780.19	65.7659	-0.229256	6275.81
QC_ESTD10000nM_LILY_rpMS1_posneg_4	LPC	LPC 17:0	Analyte	3.2	C25H52NO7P	NA	NA	NA	NA	NA	NA	NA	NA	NA	65.7659	0.914974	9.88554
QC_ESTD10000nM_LILY_rpMS1_posneg_4	LPC	LPC 18:0	ESTD	3.6	C26H54NO7P	286.248	29.2932	31544.9	NA	NA	NA	64.7639	-1.52189	4460.96	65.7659	1.6445	6801.64
QC_ESTD10000nM_LILY_rpMS1_posneg_4	LPC	LPC 18:1	Analyte	2.9	H52C26NO7P	286.248	30.7626	154.033	NA	NA	NA	64.7639	-1.07539	70.2325	65.7659	-1.00776	49.3994
QC_ESTD10000nM_LILY_rpMS1_posneg_4	LPC	LPC 18:2	Analyte	2.4	H50C26NO7P	NA	NA	NA	NA	NA	NA	NA	NA	NA	65.7659	0.28858	15.1119
QC_ESTD10000nM_LILY_rpMS1_posneg_4	LPC	LPC 18:3	Analyte	2.1	H48C26NO7P	NA	NA	NA	NA	NA	NA	NA	NA	NA	65.7659	6.10183	18.3546
QC_ESTD10000nM_LILY_rpMS1_posneg_4	LPC	LPC 20:4	Analyte	2.3	C28H50NO7P	NA	NA	NA	NA	NA	NA	64.7639	4.19949	68.2218	65.7659	5.87883	61.2312
QC_ESTD10000nM_LILY_rpMS1_posneg_4	LPC	LPC 22:6	Analyte	2.2	C30H50NO7P	NA	NA	NA	NA	NA	NA	NA	NA	NA	65.7659	9.47532	13.1838
QC_ESTD10000nM_LILY_rpMS1_posneg_4	LPC	LPC O-18:1	Analyte	4.1	C26 H54 O6 N1 P1	NA	NA	NA	NA	NA	NA	NA	NA	NA	65.7659	-0.90848	16.4797
QC_ESTD10000nM_LILY_rpMS1_posneg_4	LPE	LPE 18:0	ESTD	3.8	H48C23NO7P	NA	NA	NA	NA	NA	NA	107.506	0.708065	7263.62	100.734	0.827119	5814.47
QC_ESTD10000nM_LILY_rpMS1_posneg_4	PC	PC 30:0	Analyte	10.1	C38H76NO8P	NA	0.0074994	34.8157	NA	NA	NA	84.9997	-0.226819	41.335	95.683	0.461465	44.436
QC_ESTD10000nM_LILY_rpMS1_posneg_4	PC	PC 31:0	Analyte	11.1	C39H78NO8P	NA	13.7766	76.1801	NA	NA	NA	NA	NA	NA	95.683	5.86468	48.3197
QC_ESTD10000nM_LILY_rpMS1_posneg_4	PC	PC 32:0	ESTD	11.9	C40H80NO8P	NA	4.84221	4792.66	NA	NA	NA	84.9997	-1.82125	3760.24	95.683	-1.31431	4374.92
QC_ESTD10000nM_LILY_rpMS1_posneg_4	PC	PC 32:1	Analyte	10.3	H78C40NO8P	NA	NA	NA	NA	NA	NA	84.9997	-1.41756	231.875	95.683	0.174428	22.5548
QC_ESTD10000nM_LILY_rpMS1_posneg_4	PC	PC 33:1	Analyte	11.2	H80C41NO8P	NA	18.7663	34.9684	NA	NA	NA	NA	NA	NA	95.683	6.2087	25.7184
QC_ESTD10000nM_LILY_rpMS1_posneg_4	PC	PC 34:0	ESTD	13.1	C42 H84 O8 N1 P1	NA	12.1794	11164.4	NA	NA	NA	84.9997	2.73633	6001.31	95.683	3.47542	4733.44
QC_ESTD10000nM_LILY_rpMS1_posneg_4	PC	PC 34:1	ESTD	12	C42H82NO8P	NA	-1.40658	3141.31	NA	NA	NA	84.9997	-2.12067	2618.79	95.683	-1.78146	2871.3
QC_ESTD10000nM_LILY_rpMS1_posneg_4	PC	PC 34:2	ESTD	10.7	C42H80NO8P	NA	-0.55428	2203.76	NA	NA	NA	NA	NA	NA	95.683	0.648908	2787.7
QC_ESTD10000nM_LILY_rpMS1_posneg_4	PC	PC 34:3	Analyte	9.2	H78C42NO8P	NA	-3.22977	19.3801	NA	NA	NA	84.9997	-2.49798	38.7295	95.683	-2.01714	40.5381
QC_ESTD10000nM_LILY_rpMS1_posneg_4	PC	PC 34:4	Analyte	8.4	H76C42NO8P	NA	0.0455125	8.35906	NA	NA	NA	NA	NA	NA	95.683	3.79822	30.2532
QC_ESTD10000nM_LILY_rpMS1_posneg_4	PC	PC 35:0	Analyte	13.6	C43 H86 O8 N1 P1	NA	NA	55.7408	NA	NA	NA	84.9997	NA	40.634	95.683	NA	39.735
QC_ESTD10000nM_LILY_rpMS1_posneg_4	PC	PC 35:2	Analyte	11.4	H82C43NO8P	NA	NA	NA	NA	NA	NA	NA	NA	NA	95.683	-2.52083	18.5709
QC_ESTD10000nM_LILY_rpMS1_posneg_4	PC	PC 35:4	Analyte	9.4	H78C43NO8P	NA	5.73919	44.6262	NA	NA	NA	84.9997	1.05188	40.1844	95.683	-0.135175	52.3692
QC_ESTD10000nM_LILY_rpMS1_posneg_4	PC	PC 36:0	ESTD	14.1	H88C44NO8P	NA	NA	3736.32	NA	NA	NA	84.9997	-0.0242568	10391.5	95.683	-0.0953893	9254.72
QC_ESTD10000nM_LILY_rpMS1_posneg_4	PC	PC 36:1	ESTD	13.2	H86C44NO8P	NA	14.5145	23501.9	NA	NA	NA	84.9997	2.64183	12881	95.683	2.93474	9948.29
QC_ESTD10000nM_LILY_rpMS1_posneg_4	PC	PC 36:2	ESTD	12.4	C44H84NO8P	NA	3.24856	17381.1	NA	NA	NA	84.9997	1.05921	17980.1	95.683	3.66254	18421.7
QC_ESTD10000nM_LILY_rpMS1_posneg_4	PC	PC 36:3	Analyte	11.1	H82C44NO8P	NA	NA	NA	NA	NA	NA	NA	NA	NA	95.683	0.371101	98.6546
QC_ESTD10000nM_LILY_rpMS1_posneg_4	PC	PC 36:5	Analyte	9	H78C44NO8P	NA	-1.21003	91.7129	NA	NA	NA	84.9997	0.024299	122.427	95.683	1.55178	177.789
QC_ESTD10000nM_LILY_rpMS1_posneg_4	PC	PC 37:4	Analyte	11.3	H82C45NO8P	NA	4.95631	21.8901	NA	NA	NA	NA	NA	NA	95.683	-2.19729	22.23
QC_ESTD10000nM_LILY_rpMS1_posneg_4	PC	PC 37:6	Analyte	8.8	C45H78NO8P	NA	4.26435	19.4782	NA	NA	NA	NA	NA	NA	95.683	1.52533	32.1169
QC_ESTD10000nM_LILY_rpMS1_posneg_4	PC	PC 38:0	Analyte	14.9	C46 H92 O8 N1 P1	NA	NA	NA	NA	NA	NA	NA	NA	NA	95.683	NA	37.2222
QC_ESTD10000nM_LILY_rpMS1_posneg_4	PC	PC 38:1	Analyte	14.1	C46 H90 O8 N1 P1	NA	NA	117.845	NA	NA	NA	84.9997	NA	81.5986	95.683	NA	140.888
QC_ESTD10000nM_LILY_rpMS1_posneg_4	PC	PC 38:2	Analyte	13.3	C46 H88 O8 N1 P1	NA	NA	NA	NA	NA	NA	84.9997	10.8615	31.3839	95.683	30.3611	44.5456
QC_ESTD10000nM_LILY_rpMS1_posneg_4	PC	PC 38:4	ESTD	12.1	H84C46NO8P	NA	0.652788	6546.77	NA	NA	NA	84.9997	-1.08889	6979.34	95.683	0.634849	6690.63
QC_ESTD10000nM_LILY_rpMS1_posneg_4	PC	PC 38:5	Analyte	10.5	H82C46NO8P	NA	NA	NA	NA	NA	NA	NA	NA	NA	95.683	-1.0092	17.6185
QC_ESTD10000nM_LILY_rpMS1_posneg_4	PC	PC 38:6	ESTD	9.8	C46H80NO8P	NA	-2.71622	5413.32	NA	NA	NA	84.9997	3.19735	8780.5	95.683	3.80588	10579.2
QC_ESTD10000nM_LILY_rpMS1_posneg_4	PC	PC 40:0	ESTD	15.6	C48 H96 O8 N1 P1	NA	NA	3284.19	NA	NA	NA	NA	NA	NA	95.683	NA	19017.5
QC_ESTD10000nM_LILY_rpMS1_posneg_4	PC	PC 40:6	ESTD	11.7	C48H84NO8P	NA	0.494661	6732.96	NA	NA	NA	84.9997	-0.933534	6183.25	95.683	-0.0662809	6892.23
QC_ESTD10000nM_LILY_rpMS1_posneg_4	PC	PC 40:8	Analyte	8.5	C48H80NO8P	NA	3.41764	84.5095	NA	NA	NA	84.9997	1.02078	50.5696	95.683	3.57037	82.7361
QC_ESTD10000nM_LILY_rpMS1_posneg_4	PC	PC P-36:3	Analyte	11.6	C44H82NO7P	NA	NA	NA	NA	NA	NA	NA	NA	NA	95.683	-0.135175	8.66553
QC_ESTD10000nM_LILY_rpMS1_posneg_4	PE	PE 33:1	Analyte	11.8	H74C38NO8P	NA	NA	NA	201.817	NA	5.33753	NA	NA	NA	146.568	NA	4.61833
QC_ESTD10000nM_LILY_rpMS1_posneg_4	PE	PE 34:1	ESTD	12.5	C39H76NO8P	60.2939	4.20324	2953.5	201.817	9.11455	4535.16	116.707	2.72247	2117.11	146.568	2.06938	1941.3
QC_ESTD10000nM_LILY_rpMS1_posneg_4	PE	PE 36:2	ESTD	12.7	C41H78NO8P	60.2939	0.921812	5864.16	NA	NA	NA	NA	NA	NA	146.568	-1.78449	4800.12
QC_ESTD10000nM_LILY_rpMS1_posneg_4	PS	PS 36:2	ESTD	11.3	C42H78NO10P	NA	NA	NA	NA	NA	NA	NA	NA	NA	46.9951	NA	11202.3
QC_ESTD10000nM_LILY_rpMS1_posneg_4	SPH	SPH 18:1;2	ESTD	2.4	C18H37NO2	NA	NA	NA	NA	NA	NA	NA	NA	NA	NA	NA	17125.7
QC_ESTD10000nM_LILY_rpMS1_posneg_4	TG	TG 40:0	Analyte	16.3	C43H82O6	NA	NA	NA	NA	NA	NA	NA	NA	NA	186.613	NA	13.1935
QC_ESTD10000nM_LILY_rpMS1_posneg_4	TG	TG 42:0	ESTD	16.6	C45H86O6	42.3543	NA	2149.75	NA	NA	NA	NA	NA	NA	186.613	1.65906	9852.51
QC_ESTD10000nM_LILY_rpMS1_posneg_4	TG	TG 44:0	Analyte	16.9	C47H90O6	NA	NA	NA	NA	NA	NA	NA	NA	NA	186.613	NA	17.9941
QC_ESTD10000nM_LILY_rpMS1_posneg_4	TG	TG 46:0	Analyte	17.1	C49H94O6	42.3543	NA	26.6648	NA	NA	NA	NA	NA	NA	186.613	NA	47.0285
QC_ESTD10000nM_LILY_rpMS1_posneg_4	TG	TG 47:0	Analyte	17.2	C50H96O6	NA	NA	NA	NA	NA	NA	NA	NA	NA	186.613	NA	21.1627
QC_ESTD10000nM_LILY_rpMS1_posneg_4	TG	TG 48:0	ESTD	17.3	C51H98O6	42.3543	0.071354	2038.76	NA	NA	NA	NA	NA	NA	186.613	6.2825	9305.88
QC_ESTD10000nM_LILY_rpMS1_posneg_4	TG	TG 48:3	ESTD	16.7	C51H92O6	42.3543	NA	2403.99	NA	NA	NA	NA	NA	NA	186.613	NA	11128.8
QC_ESTD10000nM_LILY_rpMS1_posneg_4	TG	TG 48:4	Analyte	16.4	H90C51O6	NA	NA	NA	NA	NA	NA	NA	NA	NA	186.613	-0.594309	24.0564
QC_ESTD10000nM_LILY_rpMS1_posneg_4	TG	TG 52:7	Analyte	16.4	H92C55O6	NA	NA	NA	NA	NA	NA	NA	NA	NA	186.613	4.08732	10.4879
QC_ESTD10000nM_LILY_rpMS1_posneg_4	TG	TG 54:0	ESTD	18	C57H110O6	42.3543	NA	469.859	NA	NA	NA	NA	NA	NA	186.613	NA	1278.27
QC_ESTD10000nM_LILY_rpMS1_posneg_4	TG	TG 54:3	ESTD	17.3	C57H104O6	42.3543	-0.082833	11883.1	NA	NA	NA	NA	NA	NA	186.613	3.87911	31455.3
QC_ESTD10000nM_LILY_rpMS1_posneg_4	TG	TG 54:6	ESTD	16.8	C57H98O6	42.3543	-0.3399	3881.43	NA	NA	NA	NA	NA	NA	186.613	3.63039	10607.8
QC_ESTD10000nM_LILY_rpMS1_posneg_4	TG	TG 54:8	Analyte	16.4	H94C57O6	42.3543	NA	47.2265	NA	NA	NA	NA	NA	NA	186.613	NA	135.94
QC_ESTD10000nM_LILY_rpMS1_posneg_4	TG	TG 54:9	ESTD	16.1	C57H92O6	42.3543	NA	11611.6	NA	NA	NA	NA	NA	NA	186.613	NA	10130
QC_ESTD10000nM_LILY_rpMS1_posneg_4	TG	TG 58:9	Analyte	16.8	C61 H100 O6	NA	NA	NA	NA	NA	NA	NA	NA	NA	186.613	12.4022	11.1349
QC_ESTD10000nM_LILY_rpMS1_posneg_4	TG	TG 60:3	ESTD	17.9	C63H116O6	42.3543	NA	1674.14	NA	NA	NA	NA	NA	NA	186.613	NA	8953.11
QC_ESTD10000nM_LILY_rpMS1_posneg_4	TG	TG 66:3	ESTD	18.6	C69H128O6	42.3543	NA	5371.07	NA	NA	NA	NA	NA	NA	186.613	NA	10962.3
QC_ESTD1000nM_LILY_rpMS1_posneg_1	SE	CE 16:0	ESTD	18.2	C43H76O2	NA	NA	NA	NA	NA	NA	NA	NA	NA	25.2481	3.55126	682.308
QC_ESTD1000nM_LILY_rpMS1_posneg_1	SE	CE 18:0	ESTD	18.6	C45H80O2	NA	NA	NA	NA	NA	NA	NA	NA	NA	25.2481	17.3164	942.305
QC_ESTD1000nM_LILY_rpMS1_posneg_1	SE	CE 18:2	ESTD	17.9	C45H76O2	NA	NA	NA	NA	NA	NA	NA	NA	NA	25.2481	-1.13607	1114.88
QC_ESTD1000nM_LILY_rpMS1_posneg_1	Cer	Cer 34:1;2	ESTD	12.6	C34H67NO3	NA	NA	NA	NA	NA	NA	NA	3.73008	795.264	NA	5.27689	1126.53
QC_ESTD1000nM_LILY_rpMS1_posneg_1	Cer	Cer 36:1;2	ESTD	13.7	C36H71NO3	NA	NA	NA	NA	NA	NA	NA	1.19393	856.058	NA	NA	1110.81
QC_ESTD1000nM_LILY_rpMS1_posneg_1	Cer	Cer 42:0;2	ESTD	16.1	C42H85NO3	NA	NA	NA	NA	NA	NA	NA	NA	1195.62	NA	NA	2031.94
QC_ESTD1000nM_LILY_rpMS1_posneg_1	Cer	Cer 42:1;2	ESTD	16	C42H83NO3	NA	NA	NA	NA	NA	NA	NA	5.34878	906.083	NA	7.05206	1536.03
QC_ESTD1000nM_LILY_rpMS1_posneg_1	Cer	Cer 42:2;2	ESTD	15.4	C42H81NO3	NA	NA	NA	NA	NA	NA	NA	1.60065	865.482	NA	0.292781	1354.89
QC_ESTD1000nM_LILY_rpMS1_posneg_1	Co	Co Q10	ESTD	16.8	C59H90O4	NA	NA	NA	NA	NA	NA	NA	NA	NA	NA	NA	1251.86
QC_ESTD1000nM_LILY_rpMS1_posneg_1	Co	Co Q9	Analyte	16.3	C54 H82 O4	NA	NA	NA	NA	NA	NA	NA	NA	NA	NA	NA	3.34962
QC_ESTD1000nM_LILY_rpMS1_posneg_1	DG	DG 32:0	ESTD	14.4	C35H68O5	41.4932	-1.37416	314.894	NA	NA	NA	NA	NA	NA	81.5706	-0.983759	902.023
QC_ESTD1000nM_LILY_rpMS1_posneg_1	DG	DG 32:2	Analyte	12.5	H64C35O5	NA	NA	NA	NA	NA	NA	NA	NA	NA	81.5706	NA	10.7554
QC_ESTD1000nM_LILY_rpMS1_posneg_1	DG	DG 33:1	Analyte	14	C36 H68 O5	NA	NA	NA	NA	NA	NA	NA	NA	NA	81.5706	NA	18.4141
QC_ESTD1000nM_LILY_rpMS1_posneg_1	DG	DG 34:0	Analyte	15.2	C37H72O5	41.4932	NA	30.6137	NA	NA	NA	NA	NA	NA	81.5706	NA	65.1418
QC_ESTD1000nM_LILY_rpMS1_posneg_1	DG	DG 34:1	ESTD	14.4	C37H70O5	41.4932	-1.03827	772.577	NA	NA	NA	NA	NA	NA	81.5706	-0.431748	986.464
QC_ESTD1000nM_LILY_rpMS1_posneg_1	DG	DG 34:3	Analyte	12.6	H66C37O5	NA	NA	NA	NA	NA	NA	NA	NA	NA	81.5706	NA	16.4859
QC_ESTD1000nM_LILY_rpMS1_posneg_1	DG	DG 36:0	Analyte	15.8	C39H76O5	41.4932	NA	37.6954	NA	NA	NA	NA	NA	NA	81.5706	NA	63.2401
QC_ESTD1000nM_LILY_rpMS1_posneg_1	DG	DG 36:2	ESTD	14.5	C39H72O5	41.4932	-1.52589	626.837	NA	NA	NA	NA	NA	NA	81.5706	-0.511262	1009.07
QC_ESTD1000nM_LILY_rpMS1_posneg_1	DG	DG 38:3	Analyte	14.6	C41 H74 O5	NA	NA	NA	NA	NA	NA	NA	NA	NA	81.5706	NA	18.871
QC_ESTD1000nM_LILY_rpMS1_posneg_1	DG	DG 38:4	ESTD	14.4	C41H72O5	41.4932	NA	640.34	NA	NA	NA	NA	NA	NA	81.5706	NA	1030.2
QC_ESTD1000nM_LILY_rpMS1_posneg_1	DG	DG 40:6	ESTD	14.1	C43H72O5	41.4932	NA	569.374	NA	NA	NA	NA	NA	NA	81.5706	NA	1008.6
QC_ESTD1000nM_LILY_rpMS1_posneg_1	HexCer	HexCer 34:1;2	ESTD	11.1	C40H77NO8	NA	NA	924.586	NA	NA	NA	NA	NA	NA	NA	NA	1734.12
QC_ESTD1000nM_LILY_rpMS1_posneg_1	HexCer	HexCer 36:1;2	ESTD	12.6	C42H81NO8	NA	NA	547.212	NA	NA	NA	NA	NA	NA	NA	NA	1354.24
QC_ESTD1000nM_LILY_rpMS1_posneg_1	HexCer	HexCer 42:2;2	ESTD	14.5	C48 H91 O8 N1	NA	NA	608.798	NA	NA	NA	NA	NA	NA	NA	NA	1042.44
QC_ESTD1000nM_LILY_rpMS1_posneg_1	LPC	LPC 14:0	Analyte	2.2	C22H46NO7P	NA	NA	NA	NA	NA	NA	NA	NA	NA	65.7659	1.93593	3.65736
QC_ESTD1000nM_LILY_rpMS1_posneg_1	LPC	LPC 16:0	ESTD	2.8	C24H50NO7P	286.248	25.2734	1157.44	NA	NA	NA	64.7639	-0.0675593	596.833	65.7659	-0.229256	667.583
QC_ESTD1000nM_LILY_rpMS1_posneg_1	LPC	LPC 18:0	ESTD	3.6	C26H54NO7P	286.248	29.2932	738.8	NA	NA	NA	64.7639	-1.52189	441.631	65.7659	1.6445	523.51
QC_ESTD1000nM_LILY_rpMS1_posneg_1	LPC	LPC 18:2	Analyte	2.4	H50C26NO7P	NA	NA	NA	NA	NA	NA	NA	NA	NA	65.7659	0.28858	3.9842
QC_ESTD1000nM_LILY_rpMS1_posneg_1	LPC	LPC 18:3	Analyte	2.1	H48C26NO7P	NA	NA	NA	NA	NA	NA	NA	NA	NA	65.7659	6.10183	9.15744
QC_ESTD1000nM_LILY_rpMS1_posneg_1	LPC	LPC 20:4	Analyte	2.3	C28H50NO7P	NA	NA	NA	NA	NA	NA	NA	NA	NA	65.7659	5.87883	12.3996
QC_ESTD1000nM_LILY_rpMS1_posneg_1	LPC	LPC O-18:1	Analyte	4.1	C26 H54 O6 N1 P1	NA	NA	NA	NA	NA	NA	NA	NA	NA	65.7659	-0.90848	8.44686
QC_ESTD1000nM_LILY_rpMS1_posneg_1	LPE	LPE 18:0	ESTD	3.8	H48C23NO7P	NA	NA	NA	NA	NA	NA	107.506	0.708065	561.623	100.734	0.827119	587.961
QC_ESTD1000nM_LILY_rpMS1_posneg_1	PC	PC 31:0	Analyte	11.1	C39H78NO8P	NA	NA	NA	NA	NA	NA	NA	NA	NA	95.683	5.86468	7.68417
QC_ESTD1000nM_LILY_rpMS1_posneg_1	PC	PC 32:0	ESTD	11.9	C40H80NO8P	NA	4.84221	720.781	NA	NA	NA	84.9997	-1.82125	373.729	95.683	-1.31431	363.771
QC_ESTD1000nM_LILY_rpMS1_posneg_1	PC	PC 34:0	ESTD	13.1	C42 H84 O8 N1 P1	NA	12.1794	1015.04	NA	NA	NA	84.9997	2.73633	404.892	95.683	3.47542	443.643
QC_ESTD1000nM_LILY_rpMS1_posneg_1	PC	PC 34:1	ESTD	12	C42H82NO8P	NA	-1.40658	284.454	NA	NA	NA	84.9997	-2.12067	269.907	95.683	-1.78146	270.018
QC_ESTD1000nM_LILY_rpMS1_posneg_1	PC	PC 34:2	ESTD	10.7	C42H80NO8P	NA	-0.55428	200.243	NA	NA	NA	84.9997	0.730053	265.853	95.683	0.648908	258.932
QC_ESTD1000nM_LILY_rpMS1_posneg_1	PC	PC 35:0	Analyte	13.6	C43 H86 O8 N1 P1	NA	NA	NA	NA	NA	NA	NA	NA	NA	95.683	NA	6.5997
QC_ESTD1000nM_LILY_rpMS1_posneg_1	PC	PC 35:4	Analyte	9.4	H78C43NO8P	NA	5.73919	3.17055	NA	NA	NA	NA	NA	NA	95.683	-0.135175	19.9815
QC_ESTD1000nM_LILY_rpMS1_posneg_1	PC	PC 36:0	ESTD	14.1	H88C44NO8P	NA	NA	673.536	NA	NA	NA	84.9997	-0.0242568	870.835	95.683	-0.0953893	811.412
QC_ESTD1000nM_LILY_rpMS1_posneg_1	PC	PC 36:1	ESTD	13.2	H86C44NO8P	NA	14.5145	2361.96	NA	NA	NA	84.9997	2.64183	955.486	95.683	2.93474	1012.81
QC_ESTD1000nM_LILY_rpMS1_posneg_1	PC	PC 36:2	ESTD	12.4	C44H84NO8P	NA	3.24856	2239.18	NA	NA	NA	84.9997	1.05921	1834.93	95.683	3.66254	2026.51
QC_ESTD1000nM_LILY_rpMS1_posneg_1	PC	PC 36:3	Analyte	11.1	H82C44NO8P	NA	NA	NA	NA	NA	NA	NA	NA	NA	95.683	0.371101	17.3505
QC_ESTD1000nM_LILY_rpMS1_posneg_1	PC	PC 36:5	Analyte	9	H78C44NO8P	NA	NA	NA	NA	NA	NA	NA	NA	NA	95.683	1.55178	30.3879
QC_ESTD1000nM_LILY_rpMS1_posneg_1	PC	PC 37:6	Analyte	8.8	C45H78NO8P	NA	NA	NA	NA	NA	NA	NA	NA	NA	95.683	1.52533	18.8166
QC_ESTD1000nM_LILY_rpMS1_posneg_1	PC	PC 38:0	Analyte	14.9	C46 H92 O8 N1 P1	NA	NA	NA	NA	NA	NA	NA	NA	NA	95.683	NA	6.50278
QC_ESTD1000nM_LILY_rpMS1_posneg_1	PC	PC 38:1	Analyte	14.1	C46 H90 O8 N1 P1	NA	NA	NA	NA	NA	NA	NA	NA	NA	95.683	NA	11.1621
QC_ESTD1000nM_LILY_rpMS1_posneg_1	PC	PC 38:2	Analyte	13.3	C46 H88 O8 N1 P1	NA	NA	NA	NA	NA	NA	NA	NA	NA	95.683	30.3611	6.06409
QC_ESTD1000nM_LILY_rpMS1_posneg_1	PC	PC 38:4	ESTD	12.1	H84C46NO8P	NA	0.652788	749.379	NA	NA	NA	84.9997	-1.08889	695.4	95.683	0.634849	679.575
QC_ESTD1000nM_LILY_rpMS1_posneg_1	PC	PC 38:6	ESTD	9.8	C46H80NO8P	NA	-2.71622	447.754	NA	NA	NA	84.9997	3.19735	944.689	95.683	3.80588	936.234
QC_ESTD1000nM_LILY_rpMS1_posneg_1	PC	PC 40:0	ESTD	15.6	C48 H96 O8 N1 P1	NA	NA	586.786	NA	NA	NA	NA	NA	NA	95.683	NA	881.829
QC_ESTD1000nM_LILY_rpMS1_posneg_1	PC	PC 40:6	ESTD	11.7	C48H84NO8P	NA	0.494661	604.456	NA	NA	NA	84.9997	-0.933534	576.613	95.683	-0.0662809	564.93
QC_ESTD1000nM_LILY_rpMS1_posneg_1	PC	PC 40:8	Analyte	8.5	C48H80NO8P	NA	3.41764	23.474	NA	NA	NA	NA	NA	NA	95.683	3.57037	22.7771
QC_ESTD1000nM_LILY_rpMS1_posneg_1	PE	PE 34:1	ESTD	12.5	C39H76NO8P	60.2939	4.20324	255.234	201.817	9.11455	325.261	116.707	2.72247	194.503	146.568	2.06938	180.387
QC_ESTD1000nM_LILY_rpMS1_posneg_1	PE	PE 36:2	ESTD	12.7	C41H78NO8P	60.2939	0.921812	477.433	NA	NA	NA	NA	NA	NA	146.568	-1.78449	352.059
QC_ESTD1000nM_LILY_rpMS1_posneg_1	PS	PS 36:2	ESTD	11.3	C42H78NO10P	NA	NA	NA	NA	NA	NA	NA	NA	568.073	46.9951	NA	477.753
QC_ESTD1000nM_LILY_rpMS1_posneg_1	SPH	SPH 18:1;2	ESTD	2.4	C18H37NO2	NA	NA	NA	NA	NA	NA	NA	NA	NA	NA	NA	1045.59
QC_ESTD1000nM_LILY_rpMS1_posneg_1	TG	TG 42:0	ESTD	16.6	C45H86O6	42.3543	NA	331.541	NA	NA	NA	NA	NA	NA	186.613	1.65906	1592.09
QC_ESTD1000nM_LILY_rpMS1_posneg_1	TG	TG 48:0	ESTD	17.3	C51H98O6	42.3543	0.071354	385.877	NA	NA	NA	NA	NA	NA	186.613	6.2825	1973.5
QC_ESTD1000nM_LILY_rpMS1_posneg_1	TG	TG 48:3	ESTD	16.7	C51H92O6	42.3543	NA	359.605	NA	NA	NA	NA	NA	NA	186.613	NA	958.081
QC_ESTD1000nM_LILY_rpMS1_posneg_1	TG	TG 54:0	ESTD	18	C57H110O6	42.3543	NA	62.2705	NA	NA	NA	NA	NA	NA	186.613	NA	151.798
QC_ESTD1000nM_LILY_rpMS1_posneg_1	TG	TG 54:3	ESTD	17.3	C57H104O6	42.3543	-0.082833	1163.15	NA	NA	NA	NA	NA	NA	186.613	3.87911	2944.75
QC_ESTD1000nM_LILY_rpMS1_posneg_1	TG	TG 54:6	ESTD	16.8	C57H98O6	42.3543	-0.3399	308.071	NA	NA	NA	NA	NA	NA	186.613	3.63039	783.559
QC_ESTD1000nM_LILY_rpMS1_posneg_1	TG	TG 54:9	ESTD	16.1	C57H92O6	42.3543	NA	1113.18	NA	NA	NA	NA	NA	NA	186.613	NA	959.768
QC_ESTD1000nM_LILY_rpMS1_posneg_1	TG	TG 60:3	ESTD	17.9	C63H116O6	42.3543	NA	300.117	NA	NA	NA	NA	NA	NA	186.613	NA	1048.39
QC_ESTD1000nM_LILY_rpMS1_posneg_2	SE	CE 16:0	ESTD	18.2	C43H76O2	NA	NA	NA	NA	NA	NA	NA	NA	NA	25.2481	3.55126	624.012
QC_ESTD1000nM_LILY_rpMS1_posneg_2	SE	CE 18:0	ESTD	18.6	C45H80O2	NA	NA	NA	NA	NA	NA	NA	NA	NA	25.2481	17.3164	997.23
QC_ESTD1000nM_LILY_rpMS1_posneg_2	SE	CE 18:2	ESTD	17.9	C45H76O2	NA	NA	NA	NA	NA	NA	NA	NA	NA	25.2481	-1.13607	1141.52
QC_ESTD1000nM_LILY_rpMS1_posneg_2	Cer	Cer 34:1;2	ESTD	12.6	C34H67NO3	NA	NA	NA	NA	NA	NA	NA	3.73008	904.817	NA	5.27689	775.24
QC_ESTD1000nM_LILY_rpMS1_posneg_2	Cer	Cer 36:1;2	ESTD	13.7	C36H71NO3	NA	NA	NA	NA	NA	NA	NA	1.19393	973.533	NA	NA	797.566
QC_ESTD1000nM_LILY_rpMS1_posneg_2	Cer	Cer 42:0;2	ESTD	16.1	C42H85NO3	NA	NA	NA	NA	NA	NA	NA	NA	1662.15	NA	NA	1220.13
QC_ESTD1000nM_LILY_rpMS1_posneg_2	Cer	Cer 42:1;2	ESTD	16	C42H83NO3	NA	NA	NA	NA	NA	NA	NA	5.34878	1470.37	NA	7.05206	1298.74
QC_ESTD1000nM_LILY_rpMS1_posneg_2	Cer	Cer 42:2;2	ESTD	15.4	C42H81NO3	NA	NA	NA	NA	NA	NA	NA	1.60065	1124.84	NA	0.292781	885.185
QC_ESTD1000nM_LILY_rpMS1_posneg_2	Co	Co Q10	ESTD	16.8	C59H90O4	NA	NA	NA	NA	NA	NA	NA	NA	NA	NA	NA	1126.3
QC_ESTD1000nM_LILY_rpMS1_posneg_2	Co	Co Q9	Analyte	16.3	C54 H82 O4	NA	NA	NA	NA	NA	NA	NA	NA	NA	NA	NA	3.33717
QC_ESTD1000nM_LILY_rpMS1_posneg_2	DG	DG 30:0	Analyte	13.4	C33 H64 O5	NA	NA	NA	NA	NA	NA	NA	NA	NA	81.5706	-2.07379	17.5078
QC_ESTD1000nM_LILY_rpMS1_posneg_2	DG	DG 32:0	ESTD	14.4	C35H68O5	41.4932	-1.37416	470.072	NA	NA	NA	NA	NA	NA	81.5706	-0.983759	817.245
QC_ESTD1000nM_LILY_rpMS1_posneg_2	DG	DG 33:1	Analyte	14	C36 H68 O5	NA	NA	NA	NA	NA	NA	NA	NA	NA	81.5706	NA	18.7223
QC_ESTD1000nM_LILY_rpMS1_posneg_2	DG	DG 34:0	Analyte	15.2	C37H72O5	41.4932	NA	32.2342	NA	NA	NA	NA	NA	NA	81.5706	NA	57.1372
QC_ESTD1000nM_LILY_rpMS1_posneg_2	DG	DG 34:1	ESTD	14.4	C37H70O5	41.4932	-1.03827	704.757	NA	NA	NA	NA	NA	NA	81.5706	-0.431748	904.673
QC_ESTD1000nM_LILY_rpMS1_posneg_2	DG	DG 34:3	Analyte	12.6	H66C37O5	NA	NA	NA	NA	NA	NA	NA	NA	NA	81.5706	NA	16.6417
QC_ESTD1000nM_LILY_rpMS1_posneg_2	DG	DG 36:0	Analyte	15.8	C39H76O5	41.4932	NA	43.1357	NA	NA	NA	NA	NA	NA	81.5706	NA	69.439
QC_ESTD1000nM_LILY_rpMS1_posneg_2	DG	DG 36:2	ESTD	14.5	C39H72O5	41.4932	-1.52589	581.04	NA	NA	NA	NA	NA	NA	81.5706	-0.511262	937.386
QC_ESTD1000nM_LILY_rpMS1_posneg_2	DG	DG 38:3	Analyte	14.6	C41 H74 O5	NA	NA	NA	NA	NA	NA	NA	NA	NA	81.5706	NA	18.7277
QC_ESTD1000nM_LILY_rpMS1_posneg_2	DG	DG 38:4	ESTD	14.4	C41H72O5	41.4932	NA	739.208	NA	NA	NA	NA	NA	NA	81.5706	NA	1184.96
QC_ESTD1000nM_LILY_rpMS1_posneg_2	DG	DG 40:6	ESTD	14.1	C43H72O5	41.4932	NA	541.888	NA	NA	NA	NA	NA	NA	81.5706	NA	819.946
QC_ESTD1000nM_LILY_rpMS1_posneg_2	HexCer	HexCer 34:1;2	ESTD	11.1	C40H77NO8	NA	NA	847.325	NA	NA	NA	NA	NA	NA	NA	NA	1513.66
QC_ESTD1000nM_LILY_rpMS1_posneg_2	HexCer	HexCer 36:1;2	ESTD	12.6	C42H81NO8	NA	NA	458.506	NA	NA	NA	NA	NA	NA	NA	NA	1077.57
QC_ESTD1000nM_LILY_rpMS1_posneg_2	HexCer	HexCer 42:2;2	ESTD	14.5	C48 H91 O8 N1	NA	NA	544.063	NA	NA	NA	NA	NA	NA	NA	NA	972.3
QC_ESTD1000nM_LILY_rpMS1_posneg_2	LPC	LPC 14:0	Analyte	2.2	C22H46NO7P	NA	NA	NA	NA	NA	NA	NA	NA	NA	65.7659	1.93593	3.50419
QC_ESTD1000nM_LILY_rpMS1_posneg_2	LPC	LPC 16:0	ESTD	2.8	C24H50NO7P	286.248	25.2734	1133.53	NA	NA	NA	64.7639	-0.0675593	556.763	65.7659	-0.229256	641.928
QC_ESTD1000nM_LILY_rpMS1_posneg_2	LPC	LPC 18:0	ESTD	3.6	C26H54NO7P	286.248	29.2932	700.156	NA	NA	NA	64.7639	-1.52189	445.356	65.7659	1.6445	524.507
QC_ESTD1000nM_LILY_rpMS1_posneg_2	LPC	LPC 20:4	Analyte	2.3	C28H50NO7P	NA	NA	NA	NA	NA	NA	NA	NA	NA	65.7659	5.87883	11.8856
QC_ESTD1000nM_LILY_rpMS1_posneg_2	LPC	LPC 22:6	Analyte	2.2	C30H50NO7P	NA	NA	NA	NA	NA	NA	NA	NA	NA	65.7659	9.47532	8.8112
QC_ESTD1000nM_LILY_rpMS1_posneg_2	LPC	LPC O-18:1	Analyte	4.1	C26 H54 O6 N1 P1	NA	NA	NA	NA	NA	NA	NA	NA	NA	65.7659	-0.90848	8.46161
QC_ESTD1000nM_LILY_rpMS1_posneg_2	LPE	LPE 18:0	ESTD	3.8	H48C23NO7P	NA	NA	NA	NA	NA	NA	107.506	0.708065	599.937	100.734	0.827119	588.986
QC_ESTD1000nM_LILY_rpMS1_posneg_2	PC	PC 31:0	Analyte	11.1	C39H78NO8P	NA	NA	NA	NA	NA	NA	NA	NA	NA	95.683	5.86468	7.20942
QC_ESTD1000nM_LILY_rpMS1_posneg_2	PC	PC 32:0	ESTD	11.9	C40H80NO8P	NA	4.84221	760.972	NA	NA	NA	84.9997	-1.82125	374.589	95.683	-1.31431	381.368
QC_ESTD1000nM_LILY_rpMS1_posneg_2	PC	PC 33:1	DeutISTD	11.2	C41H80NO8P	NA	NA	NA	NA	NA	NA	NA	NA	NA	95.683	6.2087	6.32997
QC_ESTD1000nM_LILY_rpMS1_posneg_2	PC	PC 34:0	ESTD	13.1	C42 H84 O8 N1 P1	NA	12.1794	1027.87	NA	NA	NA	84.9997	2.73633	433.064	95.683	3.47542	448.576
QC_ESTD1000nM_LILY_rpMS1_posneg_2	PC	PC 34:1	ESTD	12	C42H82NO8P	NA	-1.40658	279.714	NA	NA	NA	84.9997	-2.12067	266.027	95.683	-1.78146	265.701
QC_ESTD1000nM_LILY_rpMS1_posneg_2	PC	PC 34:2	ESTD	10.7	C42H80NO8P	NA	-0.55428	206.997	NA	NA	NA	84.9997	0.730053	273.376	95.683	0.648908	267.361
QC_ESTD1000nM_LILY_rpMS1_posneg_2	PC	PC 35:0	Analyte	13.6	C43 H86 O8 N1 P1	NA	NA	NA	NA	NA	NA	NA	NA	NA	95.683	NA	6.62185
QC_ESTD1000nM_LILY_rpMS1_posneg_2	PC	PC 35:4	Analyte	9.4	H78C43NO8P	NA	5.73919	4.49696	NA	NA	NA	NA	NA	NA	95.683	-0.135175	20.9685
QC_ESTD1000nM_LILY_rpMS1_posneg_2	PC	PC 36:0	ESTD	14.1	H88C44NO8P	NA	NA	662.487	NA	NA	NA	84.9997	-0.0242568	865.256	95.683	-0.0953893	827.552
QC_ESTD1000nM_LILY_rpMS1_posneg_2	PC	PC 36:1	ESTD	13.2	H86C44NO8P	NA	14.5145	2410.65	NA	NA	NA	84.9997	2.64183	990.507	95.683	2.93474	1033.38
QC_ESTD1000nM_LILY_rpMS1_posneg_2	PC	PC 36:2	ESTD	12.4	C44H84NO8P	NA	3.24856	2067.07	NA	NA	NA	84.9997	1.05921	1883.4	95.683	3.66254	1840.16
QC_ESTD1000nM_LILY_rpMS1_posneg_2	PC	PC 36:3	Analyte	11.1	H82C44NO8P	NA	NA	NA	NA	NA	NA	NA	NA	NA	95.683	0.371101	17.6605
QC_ESTD1000nM_LILY_rpMS1_posneg_2	PC	PC 36:5	Analyte	9	H78C44NO8P	NA	NA	NA	NA	NA	NA	NA	NA	NA	95.683	1.55178	30.9358
QC_ESTD1000nM_LILY_rpMS1_posneg_2	PC	PC 37:6	Analyte	8.8	C45H78NO8P	NA	4.26435	2.10765	NA	NA	NA	NA	NA	NA	95.683	1.52533	19.1905
QC_ESTD1000nM_LILY_rpMS1_posneg_2	PC	PC 38:0	Analyte	14.9	C46 H92 O8 N1 P1	NA	NA	NA	NA	NA	NA	NA	NA	NA	95.683	NA	6.41788
QC_ESTD1000nM_LILY_rpMS1_posneg_2	PC	PC 38:1	Analyte	14.1	C46 H90 O8 N1 P1	NA	NA	NA	NA	NA	NA	NA	NA	NA	95.683	NA	11.7046
QC_ESTD1000nM_LILY_rpMS1_posneg_2	PC	PC 38:2	Analyte	13.3	C46 H88 O8 N1 P1	NA	NA	NA	NA	NA	NA	NA	NA	NA	95.683	30.3611	6.599
QC_ESTD1000nM_LILY_rpMS1_posneg_2	PC	PC 38:4	ESTD	12.1	H84C46NO8P	NA	0.652788	772.903	NA	NA	NA	84.9997	-1.08889	713.026	95.683	0.634849	698.184
QC_ESTD1000nM_LILY_rpMS1_posneg_2	PC	PC 38:6	ESTD	9.8	C46H80NO8P	NA	-2.71622	453.584	NA	NA	NA	84.9997	3.19735	915.477	95.683	3.80588	947.557
QC_ESTD1000nM_LILY_rpMS1_posneg_2	PC	PC 40:0	ESTD	15.6	C48 H96 O8 N1 P1	NA	NA	562.82	NA	NA	NA	NA	NA	NA	95.683	NA	932.639
QC_ESTD1000nM_LILY_rpMS1_posneg_2	PC	PC 40:6	ESTD	11.7	C48H84NO8P	NA	0.494661	594.806	NA	NA	NA	84.9997	-0.933534	555.539	95.683	-0.0662809	557.296
QC_ESTD1000nM_LILY_rpMS1_posneg_2	PC	PC 40:8	Analyte	8.5	C48H80NO8P	NA	3.41764	27.1197	NA	NA	NA	NA	NA	NA	95.683	3.57037	24.6588
QC_ESTD1000nM_LILY_rpMS1_posneg_2	PE	PE 34:1	ESTD	12.5	C39H76NO8P	60.2939	4.20324	252.314	201.817	9.11455	299.016	116.707	2.72247	193.43	146.568	2.06938	178.549
QC_ESTD1000nM_LILY_rpMS1_posneg_2	PE	PE 36:2	ESTD	12.7	C41H78NO8P	60.2939	0.921812	498.245	NA	NA	NA	NA	NA	NA	146.568	-1.78449	369.245
QC_ESTD1000nM_LILY_rpMS1_posneg_2	PS	PS 36:2	ESTD	11.3	C42H78NO10P	NA	NA	NA	NA	NA	NA	NA	NA	512.342	46.9951	NA	433.473
QC_ESTD1000nM_LILY_rpMS1_posneg_2	SPH	SPH 18:1;2	ESTD	2.4	C18H37NO2	NA	NA	NA	NA	NA	NA	NA	NA	NA	NA	NA	1238.96
QC_ESTD1000nM_LILY_rpMS1_posneg_2	TG	TG 42:0	ESTD	16.6	C45H86O6	42.3543	NA	328.497	NA	NA	NA	NA	NA	NA	186.613	1.65906	1908.65
QC_ESTD1000nM_LILY_rpMS1_posneg_2	TG	TG 48:0	ESTD	17.3	C51H98O6	42.3543	0.071354	373.296	NA	NA	NA	NA	NA	NA	186.613	6.2825	2269.2
QC_ESTD1000nM_LILY_rpMS1_posneg_2	TG	TG 48:3	ESTD	16.7	C51H92O6	42.3543	NA	353.134	NA	NA	NA	NA	NA	NA	186.613	NA	1070.35
QC_ESTD1000nM_LILY_rpMS1_posneg_2	TG	TG 54:0	ESTD	18	C57H110O6	42.3543	NA	67.0162	NA	NA	NA	NA	NA	NA	186.613	NA	177.3
QC_ESTD1000nM_LILY_rpMS1_posneg_2	TG	TG 54:3	ESTD	17.3	C57H104O6	42.3543	-0.082833	1225.68	NA	NA	NA	NA	NA	NA	186.613	3.87911	3111.05
QC_ESTD1000nM_LILY_rpMS1_posneg_2	TG	TG 54:6	ESTD	16.8	C57H98O6	42.3543	-0.3399	352.258	NA	NA	NA	NA	NA	NA	186.613	3.63039	905.471
QC_ESTD1000nM_LILY_rpMS1_posneg_2	TG	TG 54:9	ESTD	16.1	C57H92O6	42.3543	NA	1127.34	NA	NA	NA	NA	NA	NA	186.613	NA	972.135
QC_ESTD1000nM_LILY_rpMS1_posneg_2	TG	TG 60:3	ESTD	17.9	C63H116O6	42.3543	NA	277.766	NA	NA	NA	NA	NA	NA	186.613	NA	895.754
QC_ESTD1000nM_LILY_rpMS1_posneg_2	TG	TG 66:3	ESTD	18.6	C69H128O6	42.3543	NA	380.57	NA	NA	NA	NA	NA	NA	186.613	NA	847.922
QC_ESTD1000nM_LILY_rpMS1_posneg_3	SE	CE 16:0	ESTD	18.2	C43H76O2	NA	NA	NA	NA	NA	NA	NA	NA	NA	25.2481	3.55126	866.601
QC_ESTD1000nM_LILY_rpMS1_posneg_3	SE	CE 18:0	ESTD	18.6	C45H80O2	NA	NA	NA	NA	NA	NA	NA	NA	NA	25.2481	17.3164	1342.82
QC_ESTD1000nM_LILY_rpMS1_posneg_3	SE	CE 18:2	ESTD	17.9	C45H76O2	NA	NA	NA	NA	NA	NA	NA	NA	NA	25.2481	-1.13607	1217.31
QC_ESTD1000nM_LILY_rpMS1_posneg_3	Cer	Cer 34:1;2	ESTD	12.6	C34H67NO3	NA	NA	NA	NA	NA	NA	NA	3.73008	864.332	NA	5.27689	1083.14
QC_ESTD1000nM_LILY_rpMS1_posneg_3	Cer	Cer 36:1;2	ESTD	13.7	C36H71NO3	NA	NA	NA	NA	NA	NA	NA	1.19393	904.79	NA	NA	836.491
QC_ESTD1000nM_LILY_rpMS1_posneg_3	Cer	Cer 42:0;2	ESTD	16.1	C42H85NO3	NA	NA	NA	NA	NA	NA	NA	NA	1293.5	NA	NA	1279.19
QC_ESTD1000nM_LILY_rpMS1_posneg_3	Cer	Cer 42:1;2	ESTD	16	C42H83NO3	NA	NA	NA	NA	NA	NA	NA	5.34878	1047.16	NA	7.05206	1269.61
QC_ESTD1000nM_LILY_rpMS1_posneg_3	Cer	Cer 42:2;2	ESTD	15.4	C42H81NO3	NA	NA	NA	NA	NA	NA	NA	1.60065	910.189	NA	0.292781	914.579
QC_ESTD1000nM_LILY_rpMS1_posneg_3	Co	Co Q10	ESTD	16.8	C59H90O4	NA	NA	NA	NA	NA	NA	NA	NA	NA	NA	NA	1288.58
QC_ESTD1000nM_LILY_rpMS1_posneg_3	Co	Co Q9	Analyte	16.3	C54 H82 O4	NA	NA	NA	NA	NA	NA	NA	NA	NA	NA	NA	3.47344
QC_ESTD1000nM_LILY_rpMS1_posneg_3	DG	DG 30:0	Analyte	13.4	C33 H64 O5	NA	NA	NA	NA	NA	NA	NA	NA	NA	81.5706	-2.07379	17.583
QC_ESTD1000nM_LILY_rpMS1_posneg_3	DG	DG 32:0	ESTD	14.4	C35H68O5	41.4932	-1.37416	331.085	NA	NA	NA	NA	NA	NA	81.5706	-0.983759	775.296
QC_ESTD1000nM_LILY_rpMS1_posneg_3	DG	DG 32:2	Analyte	12.5	H64C35O5	NA	NA	NA	NA	NA	NA	NA	NA	NA	81.5706	NA	10.5403
QC_ESTD1000nM_LILY_rpMS1_posneg_3	DG	DG 33:1	Analyte	14	C36 H68 O5	NA	NA	NA	NA	NA	NA	NA	NA	NA	81.5706	NA	18.344
QC_ESTD1000nM_LILY_rpMS1_posneg_3	DG	DG 34:0	Analyte	15.2	C37H72O5	41.4932	NA	33.4069	NA	NA	NA	NA	NA	NA	81.5706	NA	67.5024
QC_ESTD1000nM_LILY_rpMS1_posneg_3	DG	DG 34:1	ESTD	14.4	C37H70O5	41.4932	-1.03827	713.127	NA	NA	NA	NA	NA	NA	81.5706	-0.431748	914.768
QC_ESTD1000nM_LILY_rpMS1_posneg_3	DG	DG 34:3	Analyte	12.6	H66C37O5	NA	NA	NA	NA	NA	NA	NA	NA	NA	81.5706	NA	17.3607
QC_ESTD1000nM_LILY_rpMS1_posneg_3	DG	DG 36:0	Analyte	15.8	C39H76O5	NA	NA	NA	NA	NA	NA	NA	NA	NA	81.5706	NA	43.0551
QC_ESTD1000nM_LILY_rpMS1_posneg_3	DG	DG 36:2	ESTD	14.5	C39H72O5	41.4932	-1.52589	603.04	NA	NA	NA	NA	NA	NA	81.5706	-0.511262	971.822
QC_ESTD1000nM_LILY_rpMS1_posneg_3	DG	DG 38:3	Analyte	14.6	C41 H74 O5	NA	NA	NA	NA	NA	NA	NA	NA	NA	81.5706	NA	18.8351
QC_ESTD1000nM_LILY_rpMS1_posneg_3	DG	DG 38:4	ESTD	14.4	C41H72O5	41.4932	NA	765.027	NA	NA	NA	NA	NA	NA	81.5706	NA	1225.37
QC_ESTD1000nM_LILY_rpMS1_posneg_3	DG	DG 40:6	ESTD	14.1	C43H72O5	41.4932	NA	589.178	NA	NA	NA	NA	NA	NA	81.5706	NA	966.494
QC_ESTD1000nM_LILY_rpMS1_posneg_3	HexCer	HexCer 34:1;2	ESTD	11.1	C40H77NO8	NA	NA	896.044	NA	NA	NA	NA	NA	NA	NA	NA	1652.68
QC_ESTD1000nM_LILY_rpMS1_posneg_3	HexCer	HexCer 36:1;2	ESTD	12.6	C42H81NO8	NA	NA	519.328	NA	NA	NA	NA	NA	NA	NA	NA	1161.69
QC_ESTD1000nM_LILY_rpMS1_posneg_3	HexCer	HexCer 42:2;2	ESTD	14.5	C48 H91 O8 N1	NA	NA	547.642	NA	NA	NA	NA	NA	NA	NA	NA	896.868
QC_ESTD1000nM_LILY_rpMS1_posneg_3	LPC	LPC 14:0	Analyte	2.2	C22H46NO7P	NA	NA	NA	NA	NA	NA	NA	NA	NA	65.7659	1.93593	3.3064
QC_ESTD1000nM_LILY_rpMS1_posneg_3	LPC	LPC 16:0	ESTD	2.8	C24H50NO7P	286.248	25.2734	1134.53	NA	NA	NA	64.7639	-0.0675593	664.932	65.7659	-0.229256	682.798
QC_ESTD1000nM_LILY_rpMS1_posneg_3	LPC	LPC 18:0	ESTD	3.6	C26H54NO7P	286.248	29.2932	708.167	NA	NA	NA	64.7639	-1.52189	434.62	65.7659	1.6445	539.205
QC_ESTD1000nM_LILY_rpMS1_posneg_3	LPC	LPC 18:3	Analyte	2.1	H48C26NO7P	NA	NA	NA	NA	NA	NA	NA	NA	NA	65.7659	6.10183	8.82801
QC_ESTD1000nM_LILY_rpMS1_posneg_3	LPC	LPC 20:4	Analyte	2.3	C28H50NO7P	NA	NA	NA	NA	NA	NA	NA	NA	NA	65.7659	5.87883	11.6435
QC_ESTD1000nM_LILY_rpMS1_posneg_3	LPC	LPC O-18:1	Analyte	4.1	C26 H54 O6 N1 P1	NA	NA	NA	NA	NA	NA	NA	NA	NA	65.7659	-0.90848	8.46619
QC_ESTD1000nM_LILY_rpMS1_posneg_3	LPE	LPE 18:0	ESTD	3.8	H48C23NO7P	NA	NA	NA	NA	NA	NA	107.506	0.708065	570.72	100.734	0.827119	583.879
QC_ESTD1000nM_LILY_rpMS1_posneg_3	PC	PC 31:0	Analyte	11.1	C39H78NO8P	NA	NA	NA	NA	NA	NA	NA	NA	NA	95.683	5.86468	7.4539
QC_ESTD1000nM_LILY_rpMS1_posneg_3	PC	PC 32:0	ESTD	11.9	C40H80NO8P	NA	4.84221	729.107	NA	NA	NA	84.9997	-1.82125	379.036	95.683	-1.31431	399.518
QC_ESTD1000nM_LILY_rpMS1_posneg_3	PC	PC 34:0	ESTD	13.1	C42 H84 O8 N1 P1	NA	12.1794	1019.96	NA	NA	NA	84.9997	2.73633	461.503	95.683	3.47542	445.535
QC_ESTD1000nM_LILY_rpMS1_posneg_3	PC	PC 34:1	ESTD	12	C42H82NO8P	NA	-1.40658	283.115	NA	NA	NA	84.9997	-2.12067	261.586	95.683	-1.78146	268.799
QC_ESTD1000nM_LILY_rpMS1_posneg_3	PC	PC 34:2	ESTD	10.7	C42H80NO8P	NA	-0.55428	206.036	NA	NA	NA	84.9997	0.730053	277.994	95.683	0.648908	266.162
QC_ESTD1000nM_LILY_rpMS1_posneg_3	PC	PC 35:0	Analyte	13.6	C43 H86 O8 N1 P1	NA	NA	NA	NA	NA	NA	NA	NA	NA	95.683	NA	6.77237
QC_ESTD1000nM_LILY_rpMS1_posneg_3	PC	PC 35:4	Analyte	9.4	H78C43NO8P	NA	5.73919	3.61652	NA	NA	NA	NA	NA	NA	95.683	-0.135175	20.3133
QC_ESTD1000nM_LILY_rpMS1_posneg_3	PC	PC 36:0	ESTD	14.1	H88C44NO8P	NA	NA	680.491	NA	NA	NA	84.9997	-0.0242568	890.352	95.683	-0.0953893	816.75
QC_ESTD1000nM_LILY_rpMS1_posneg_3	PC	PC 36:1	ESTD	13.2	H86C44NO8P	NA	14.5145	2307.98	NA	NA	NA	84.9997	2.64183	1000.55	95.683	2.93474	989.988
QC_ESTD1000nM_LILY_rpMS1_posneg_3	PC	PC 36:2	ESTD	12.4	C44H84NO8P	NA	3.24856	2172.88	NA	NA	NA	84.9997	1.05921	1874.21	95.683	3.66254	1954.72
QC_ESTD1000nM_LILY_rpMS1_posneg_3	PC	PC 36:3	Analyte	11.1	H82C44NO8P	NA	NA	NA	NA	NA	NA	NA	NA	NA	95.683	0.371101	18.1971
QC_ESTD1000nM_LILY_rpMS1_posneg_3	PC	PC 36:5	Analyte	9	H78C44NO8P	NA	NA	NA	NA	NA	NA	NA	NA	NA	95.683	1.55178	31.2604
QC_ESTD1000nM_LILY_rpMS1_posneg_3	PC	PC 38:0	Analyte	14.9	C46 H92 O8 N1 P1	NA	NA	NA	NA	NA	NA	NA	NA	NA	95.683	NA	6.2196
QC_ESTD1000nM_LILY_rpMS1_posneg_3	PC	PC 38:1	Analyte	14.1	C46 H90 O8 N1 P1	NA	NA	NA	NA	NA	NA	NA	NA	NA	95.683	NA	9.22504
QC_ESTD1000nM_LILY_rpMS1_posneg_3	PC	PC 38:2	Analyte	13.3	C46 H88 O8 N1 P1	NA	NA	NA	NA	NA	NA	NA	NA	NA	95.683	30.3611	5.84853
QC_ESTD1000nM_LILY_rpMS1_posneg_3	PC	PC 38:4	ESTD	12.1	H84C46NO8P	NA	0.652788	714.209	NA	NA	NA	84.9997	-1.08889	689.911	95.683	0.634849	651.753
QC_ESTD1000nM_LILY_rpMS1_posneg_3	PC	PC 38:6	ESTD	9.8	C46H80NO8P	NA	-2.71622	436.11	NA	NA	NA	84.9997	3.19735	932.292	95.683	3.80588	913.624
QC_ESTD1000nM_LILY_rpMS1_posneg_3	PC	PC 40:0	ESTD	15.6	C48 H96 O8 N1 P1	NA	NA	569.887	NA	NA	NA	NA	NA	NA	95.683	NA	669.22
QC_ESTD1000nM_LILY_rpMS1_posneg_3	PC	PC 40:6	ESTD	11.7	C48H84NO8P	NA	0.494661	629.173	NA	NA	NA	84.9997	-0.933534	591.844	95.683	-0.0662809	584.483
QC_ESTD1000nM_LILY_rpMS1_posneg_3	PC	PC 40:8	Analyte	8.5	C48H80NO8P	NA	3.41764	26.1119	NA	NA	NA	NA	NA	NA	95.683	3.57037	22.4113
QC_ESTD1000nM_LILY_rpMS1_posneg_3	PC	PC P-38:2	Analyte	13.4	C46 H88 O7 N1 P1	NA	NA	NA	NA	NA	NA	NA	NA	NA	95.683	2.31404	5.31983
QC_ESTD1000nM_LILY_rpMS1_posneg_3	PE	PE 34:1	ESTD	12.5	C39H76NO8P	60.2939	4.20324	263.234	201.817	9.11455	351.736	116.707	2.72247	204.824	146.568	2.06938	185.424
QC_ESTD1000nM_LILY_rpMS1_posneg_3	PE	PE 36:2	ESTD	12.7	C41H78NO8P	60.2939	0.921812	517.331	NA	NA	NA	NA	NA	NA	146.568	-1.78449	385.005
QC_ESTD1000nM_LILY_rpMS1_posneg_3	PS	PS 36:2	ESTD	11.3	C42H78NO10P	NA	NA	NA	NA	NA	NA	NA	NA	559.888	46.9951	NA	464.511
QC_ESTD1000nM_LILY_rpMS1_posneg_3	SPH	SPH 18:1;2	ESTD	2.4	C18H37NO2	NA	NA	NA	NA	NA	NA	NA	NA	NA	NA	NA	954.282
QC_ESTD1000nM_LILY_rpMS1_posneg_3	TG	TG 42:0	ESTD	16.6	C45H86O6	42.3543	NA	303.845	NA	NA	NA	NA	NA	NA	186.613	1.65906	1400.96
QC_ESTD1000nM_LILY_rpMS1_posneg_3	TG	TG 48:0	ESTD	17.3	C51H98O6	42.3543	0.071354	372.98	NA	NA	NA	NA	NA	NA	186.613	6.2825	1887
QC_ESTD1000nM_LILY_rpMS1_posneg_3	TG	TG 48:3	ESTD	16.7	C51H92O6	42.3543	NA	324.374	NA	NA	NA	NA	NA	NA	186.613	NA	968.45
QC_ESTD1000nM_LILY_rpMS1_posneg_3	TG	TG 54:0	ESTD	18	C57H110O6	42.3543	NA	60.6041	NA	NA	NA	NA	NA	NA	186.613	NA	172.995
QC_ESTD1000nM_LILY_rpMS1_posneg_3	TG	TG 54:3	ESTD	17.3	C57H104O6	42.3543	-0.082833	1156.85	NA	NA	NA	NA	NA	NA	186.613	3.87911	2927.99
QC_ESTD1000nM_LILY_rpMS1_posneg_3	TG	TG 54:6	ESTD	16.8	C57H98O6	42.3543	-0.3399	350.923	NA	NA	NA	NA	NA	NA	186.613	3.63039	901.787
QC_ESTD1000nM_LILY_rpMS1_posneg_3	TG	TG 54:9	ESTD	16.1	C57H92O6	42.3543	NA	1154.49	NA	NA	NA	NA	NA	NA	186.613	NA	995.853
QC_ESTD1000nM_LILY_rpMS1_posneg_3	TG	TG 60:3	ESTD	17.9	C63H116O6	42.3543	NA	295.129	NA	NA	NA	NA	NA	NA	186.613	NA	1160.45
QC_ESTD1000nM_LILY_rpMS1_posneg_3	TG	TG 66:3	ESTD	18.6	C69H128O6	42.3543	NA	366.53	NA	NA	NA	NA	NA	NA	186.613	NA	1053.02
QC_ESTD1000nM_LILY_rpMS1_posneg_4	SE	CE 16:0	ESTD	18.2	C43H76O2	NA	NA	NA	NA	NA	NA	NA	NA	NA	25.2481	3.55126	872.344
QC_ESTD1000nM_LILY_rpMS1_posneg_4	SE	CE 18:0	ESTD	18.6	C45H80O2	NA	NA	NA	NA	NA	NA	NA	NA	NA	25.2481	17.3164	1111.74
QC_ESTD1000nM_LILY_rpMS1_posneg_4	SE	CE 18:2	ESTD	17.9	C45H76O2	NA	NA	NA	NA	NA	NA	NA	NA	NA	25.2481	-1.13607	1233.9
QC_ESTD1000nM_LILY_rpMS1_posneg_4	Cer	Cer 34:1;2	ESTD	12.6	C34H67NO3	NA	NA	NA	NA	NA	NA	NA	3.73008	822.118	NA	5.27689	966.014
QC_ESTD1000nM_LILY_rpMS1_posneg_4	Cer	Cer 36:1;2	ESTD	13.7	C36H71NO3	NA	NA	NA	NA	NA	NA	NA	NA	NA	NA	NA	915.162
QC_ESTD1000nM_LILY_rpMS1_posneg_4	Cer	Cer 42:0;2	ESTD	16.1	C42H85NO3	NA	NA	NA	NA	NA	NA	NA	NA	1228.85	NA	NA	1280.48
QC_ESTD1000nM_LILY_rpMS1_posneg_4	Cer	Cer 42:1;2	ESTD	16	C42H83NO3	NA	NA	NA	NA	NA	NA	NA	5.34878	1302.36	NA	7.05206	1441.41
QC_ESTD1000nM_LILY_rpMS1_posneg_4	Cer	Cer 42:2;2	ESTD	15.4	C42H81NO3	NA	NA	NA	NA	NA	NA	NA	1.60065	984.489	NA	0.292781	979.904
QC_ESTD1000nM_LILY_rpMS1_posneg_4	Co	Co Q10	ESTD	16.8	C59H90O4	NA	NA	NA	NA	NA	NA	NA	NA	NA	NA	NA	1117.44
QC_ESTD1000nM_LILY_rpMS1_posneg_4	Co	Co Q9	Analyte	16.3	C54 H82 O4	NA	NA	NA	NA	NA	NA	NA	NA	NA	NA	NA	3.44676
QC_ESTD1000nM_LILY_rpMS1_posneg_4	DG	DG 30:0	Analyte	13.4	C33 H64 O5	NA	NA	NA	NA	NA	NA	NA	NA	NA	81.5706	-2.07379	17.4709
QC_ESTD1000nM_LILY_rpMS1_posneg_4	DG	DG 32:0	ESTD	14.4	C35H68O5	41.4932	-1.37416	325.953	NA	NA	NA	NA	NA	NA	81.5706	-0.983759	946.393
QC_ESTD1000nM_LILY_rpMS1_posneg_4	DG	DG 33:1	Analyte	14	C36 H68 O5	NA	NA	NA	NA	NA	NA	NA	NA	NA	81.5706	NA	18.1766
QC_ESTD1000nM_LILY_rpMS1_posneg_4	DG	DG 34:0	Analyte	15.2	C37H72O5	41.4932	NA	32.2163	NA	NA	NA	NA	NA	NA	81.5706	NA	58.0995
QC_ESTD1000nM_LILY_rpMS1_posneg_4	DG	DG 34:1	ESTD	14.4	C37H70O5	41.4932	-1.03827	710.271	NA	NA	NA	NA	NA	NA	81.5706	-0.431748	911.323
QC_ESTD1000nM_LILY_rpMS1_posneg_4	DG	DG 34:3	Analyte	12.6	H66C37O5	NA	NA	NA	NA	NA	NA	NA	NA	NA	81.5706	NA	19.22
QC_ESTD1000nM_LILY_rpMS1_posneg_4	DG	DG 36:0	Analyte	15.8	C39H76O5	41.4932	NA	39.6014	NA	NA	NA	NA	NA	NA	81.5706	NA	65.4119
QC_ESTD1000nM_LILY_rpMS1_posneg_4	DG	DG 36:2	ESTD	14.5	C39H72O5	41.4932	-1.52589	597.025	NA	NA	NA	NA	NA	NA	81.5706	-0.511262	962.406
QC_ESTD1000nM_LILY_rpMS1_posneg_4	DG	DG 38:3	Analyte	14.6	C41 H74 O5	NA	NA	NA	NA	NA	NA	NA	NA	NA	81.5706	NA	18.7033
QC_ESTD1000nM_LILY_rpMS1_posneg_4	DG	DG 38:4	ESTD	14.4	C41H72O5	41.4932	NA	693.836	NA	NA	NA	NA	NA	NA	81.5706	NA	1113.94
QC_ESTD1000nM_LILY_rpMS1_posneg_4	DG	DG 40:6	ESTD	14.1	C43H72O5	41.4932	NA	600.498	NA	NA	NA	NA	NA	NA	81.5706	NA	900.097
QC_ESTD1000nM_LILY_rpMS1_posneg_4	HexCer	HexCer 34:1;2	ESTD	11.1	C40H77NO8	NA	NA	864.847	NA	NA	NA	NA	NA	NA	NA	NA	1563.66
QC_ESTD1000nM_LILY_rpMS1_posneg_4	HexCer	HexCer 36:1;2	ESTD	12.6	C42H81NO8	NA	NA	454.77	NA	NA	NA	NA	NA	NA	NA	NA	693.429
QC_ESTD1000nM_LILY_rpMS1_posneg_4	HexCer	HexCer 42:2;2	ESTD	14.5	C48 H91 O8 N1	NA	NA	513.056	NA	NA	NA	NA	NA	NA	NA	NA	858.491
QC_ESTD1000nM_LILY_rpMS1_posneg_4	LPC	LPC 14:0	Analyte	2.2	C22H46NO7P	NA	NA	NA	NA	NA	NA	NA	NA	NA	65.7659	1.93593	3.41934
QC_ESTD1000nM_LILY_rpMS1_posneg_4	LPC	LPC 16:0	ESTD	2.8	C24H50NO7P	286.248	25.2734	1120.01	NA	NA	NA	64.7639	-0.0675593	646.163	65.7659	-0.229256	689.387
QC_ESTD1000nM_LILY_rpMS1_posneg_4	LPC	LPC 18:0	ESTD	3.6	C26H54NO7P	286.248	29.2932	719.519	NA	NA	NA	64.7639	-1.52189	430.609	65.7659	1.6445	593.682
QC_ESTD1000nM_LILY_rpMS1_posneg_4	LPC	LPC 18:2	Analyte	2.4	H50C26NO7P	NA	NA	NA	NA	NA	NA	NA	NA	NA	65.7659	0.28858	3.65528
QC_ESTD1000nM_LILY_rpMS1_posneg_4	LPC	LPC 20:4	Analyte	2.3	C28H50NO7P	NA	NA	NA	NA	NA	NA	NA	NA	NA	65.7659	5.87883	11.4508
QC_ESTD1000nM_LILY_rpMS1_posneg_4	LPC	LPC O-18:1	Analyte	4.1	C26 H54 O6 N1 P1	NA	NA	NA	NA	NA	NA	NA	NA	NA	65.7659	-0.90848	8.53512
QC_ESTD1000nM_LILY_rpMS1_posneg_4	LPE	LPE 18:0	ESTD	3.8	H48C23NO7P	NA	NA	NA	NA	NA	NA	107.506	0.708065	608.149	100.734	0.827119	536.671
QC_ESTD1000nM_LILY_rpMS1_posneg_4	PC	PC 31:0	Analyte	11.1	C39H78NO8P	NA	NA	NA	NA	NA	NA	NA	NA	NA	95.683	5.86468	7.55927
QC_ESTD1000nM_LILY_rpMS1_posneg_4	PC	PC 32:0	ESTD	11.9	C40H80NO8P	NA	4.84221	812.762	NA	NA	NA	84.9997	-1.82125	372.789	95.683	-1.31431	396.95
QC_ESTD1000nM_LILY_rpMS1_posneg_4	PC	PC 34:0	ESTD	13.1	C42 H84 O8 N1 P1	NA	12.1794	916.306	NA	NA	NA	84.9997	2.73633	447.05	95.683	3.47542	405.67
QC_ESTD1000nM_LILY_rpMS1_posneg_4	PC	PC 34:1	ESTD	12	C42H82NO8P	NA	-1.40658	289.592	NA	NA	NA	84.9997	-2.12067	270.893	95.683	-1.78146	274.696
QC_ESTD1000nM_LILY_rpMS1_posneg_4	PC	PC 34:2	ESTD	10.7	C42H80NO8P	NA	-0.55428	203.943	NA	NA	NA	84.9997	0.730053	273.149	95.683	0.648908	263.55
QC_ESTD1000nM_LILY_rpMS1_posneg_4	PC	PC 35:0	Analyte	13.6	C43 H86 O8 N1 P1	NA	NA	NA	NA	NA	NA	NA	NA	NA	95.683	NA	6.61463
QC_ESTD1000nM_LILY_rpMS1_posneg_4	PC	PC 35:4	Analyte	9.4	H78C43NO8P	NA	5.73919	3.81127	NA	NA	NA	NA	NA	NA	95.683	-0.135175	20.4583
QC_ESTD1000nM_LILY_rpMS1_posneg_4	PC	PC 36:0	ESTD	14.1	H88C44NO8P	NA	NA	665.646	NA	NA	NA	84.9997	-0.0242568	882.571	95.683	-0.0953893	777.877
QC_ESTD1000nM_LILY_rpMS1_posneg_4	PC	PC 36:1	ESTD	13.2	H86C44NO8P	NA	14.5145	2261.99	NA	NA	NA	84.9997	2.64183	1029.36	95.683	2.93474	970.549
QC_ESTD1000nM_LILY_rpMS1_posneg_4	PC	PC 36:2	ESTD	12.4	C44H84NO8P	NA	3.24856	2123.16	NA	NA	NA	84.9997	1.05921	1857.89	95.683	3.66254	1900.89
QC_ESTD1000nM_LILY_rpMS1_posneg_4	PC	PC 36:3	Analyte	11.1	H82C44NO8P	NA	NA	NA	NA	NA	NA	NA	NA	NA	95.683	0.371101	16.943
QC_ESTD1000nM_LILY_rpMS1_posneg_4	PC	PC 36:5	Analyte	9	H78C44NO8P	NA	NA	NA	NA	NA	NA	NA	NA	NA	95.683	1.55178	31.4014
QC_ESTD1000nM_LILY_rpMS1_posneg_4	PC	PC 37:6	Analyte	8.8	C45H78NO8P	NA	NA	NA	NA	NA	NA	NA	NA	NA	95.683	1.52533	18.7487
QC_ESTD1000nM_LILY_rpMS1_posneg_4	PC	PC 38:0	Analyte	14.9	C46 H92 O8 N1 P1	NA	NA	NA	NA	NA	NA	NA	NA	NA	95.683	NA	6.00368
QC_ESTD1000nM_LILY_rpMS1_posneg_4	PC	PC 38:1	Analyte	14.1	C46 H90 O8 N1 P1	NA	NA	NA	NA	NA	NA	NA	NA	NA	95.683	NA	9.14492
QC_ESTD1000nM_LILY_rpMS1_posneg_4	PC	PC 38:2	Analyte	13.3	C46 H88 O8 N1 P1	NA	NA	NA	NA	NA	NA	NA	NA	NA	95.683	30.3611	5.60946
QC_ESTD1000nM_LILY_rpMS1_posneg_4	PC	PC 38:4	ESTD	12.1	H84C46NO8P	NA	0.652788	769.938	NA	NA	NA	84.9997	-1.08889	689.514	95.683	0.634849	695.839
QC_ESTD1000nM_LILY_rpMS1_posneg_4	PC	PC 38:6	ESTD	9.8	C46H80NO8P	NA	-2.71622	451.748	NA	NA	NA	84.9997	3.19735	947.454	95.683	3.80588	943.992
QC_ESTD1000nM_LILY_rpMS1_posneg_4	PC	PC 40:0	ESTD	15.6	C48 H96 O8 N1 P1	NA	NA	517.898	NA	NA	NA	NA	NA	NA	95.683	NA	657.835
QC_ESTD1000nM_LILY_rpMS1_posneg_4	PC	PC 40:6	ESTD	11.7	C48H84NO8P	NA	0.494661	636.017	NA	NA	NA	84.9997	-0.933534	545.103	95.683	-0.0662809	589.897
QC_ESTD1000nM_LILY_rpMS1_posneg_4	PC	PC 40:8	Analyte	8.5	C48H80NO8P	NA	3.41764	24.9151	NA	NA	NA	NA	NA	NA	95.683	3.57037	23.1456
QC_ESTD1000nM_LILY_rpMS1_posneg_4	PE	PE 34:1	ESTD	12.5	C39H76NO8P	60.2939	4.20324	252.386	201.817	9.11455	313.227	116.707	2.72247	199.364	146.568	2.06938	178.595
QC_ESTD1000nM_LILY_rpMS1_posneg_4	PE	PE 36:2	ESTD	12.7	C41H78NO8P	60.2939	0.921812	502.245	NA	NA	NA	NA	NA	NA	146.568	-1.78449	372.548
QC_ESTD1000nM_LILY_rpMS1_posneg_4	PS	PS 36:2	ESTD	11.3	C42H78NO10P	NA	NA	NA	NA	NA	NA	NA	NA	541.692	46.9951	NA	444.747
QC_ESTD1000nM_LILY_rpMS1_posneg_4	SPH	SPH 18:1;2	ESTD	2.4	C18H37NO2	NA	NA	NA	NA	NA	NA	NA	NA	NA	NA	NA	1061.08
QC_ESTD1000nM_LILY_rpMS1_posneg_4	TG	TG 42:0	ESTD	16.6	C45H86O6	42.3543	NA	321.538	NA	NA	NA	NA	NA	NA	186.613	1.65906	1512.73
QC_ESTD1000nM_LILY_rpMS1_posneg_4	TG	TG 48:0	ESTD	17.3	C51H98O6	42.3543	0.071354	388.361	NA	NA	NA	NA	NA	NA	186.613	6.2825	1979.9
QC_ESTD1000nM_LILY_rpMS1_posneg_4	TG	TG 48:3	ESTD	16.7	C51H92O6	42.3543	NA	351.761	NA	NA	NA	NA	NA	NA	186.613	NA	951.904
QC_ESTD1000nM_LILY_rpMS1_posneg_4	TG	TG 54:0	ESTD	18	C57H110O6	42.3543	NA	60.9131	NA	NA	NA	NA	NA	NA	186.613	NA	168.058
QC_ESTD1000nM_LILY_rpMS1_posneg_4	TG	TG 54:3	ESTD	17.3	C57H104O6	42.3543	-0.082833	1185.92	NA	NA	NA	NA	NA	NA	186.613	3.87911	3005.31
QC_ESTD1000nM_LILY_rpMS1_posneg_4	TG	TG 54:6	ESTD	16.8	C57H98O6	42.3543	-0.3399	376.824	NA	NA	NA	NA	NA	NA	186.613	3.63039	973.247
QC_ESTD1000nM_LILY_rpMS1_posneg_4	TG	TG 54:9	ESTD	16.1	C57H92O6	42.3543	NA	1174.14	NA	NA	NA	NA	NA	NA	186.613	NA	1013.02
QC_ESTD1000nM_LILY_rpMS1_posneg_4	TG	TG 60:3	ESTD	17.9	C63H116O6	42.3543	NA	277.247	NA	NA	NA	NA	NA	NA	186.613	NA	968.664
QC_ESTD1000nM_LILY_rpMS1_posneg_4	TG	TG 66:3	ESTD	18.6	C69H128O6	42.3543	NA	369.372	NA	NA	NA	NA	NA	NA	186.613	NA	920.437
QC_ESTD100nM_LILY_rpMS1_posneg_1	Cer	Cer 34:1;2	ESTD	12.6	C34H67NO3	NA	NA	NA	NA	NA	NA	NA	3.73008	89.164	NA	5.27689	84.6438
QC_ESTD100nM_LILY_rpMS1_posneg_1	Cer	Cer 36:1;2	ESTD	13.7	C36H71NO3	NA	NA	NA	NA	NA	NA	NA	1.19393	93.5263	NA	NA	82.1911
QC_ESTD100nM_LILY_rpMS1_posneg_1	Cer	Cer 42:0;2	ESTD	16.1	C42H85NO3	NA	NA	NA	NA	NA	NA	NA	NA	130.203	NA	NA	125.514
QC_ESTD100nM_LILY_rpMS1_posneg_1	Cer	Cer 42:1;2	ESTD	16	C42H83NO3	NA	NA	NA	NA	NA	NA	NA	5.34878	116.431	NA	7.05206	125.82
QC_ESTD100nM_LILY_rpMS1_posneg_1	Cer	Cer 42:2;2	ESTD	15.4	C42H81NO3	NA	NA	NA	NA	NA	NA	NA	1.60065	89.6218	NA	0.292781	79.5423
QC_ESTD100nM_LILY_rpMS1_posneg_1	Co	Co Q10	ESTD	16.8	C59H90O4	NA	NA	NA	NA	NA	NA	NA	NA	NA	NA	NA	80.2461
QC_ESTD100nM_LILY_rpMS1_posneg_1	DG	DG 32:0	ESTD	14.4	C35H68O5	41.4932	-1.37416	63.7152	NA	NA	NA	NA	NA	NA	81.5706	-0.983759	101.2
QC_ESTD100nM_LILY_rpMS1_posneg_1	DG	DG 32:2	Analyte	12.5	H64C35O5	NA	NA	NA	NA	NA	NA	NA	NA	NA	81.5706	NA	11.3645
QC_ESTD100nM_LILY_rpMS1_posneg_1	DG	DG 33:1	Analyte	14	C36 H68 O5	NA	NA	NA	NA	NA	NA	NA	NA	NA	81.5706	NA	17.6519
QC_ESTD100nM_LILY_rpMS1_posneg_1	DG	DG 34:0	Analyte	15.2	C37H72O5	NA	NA	NA	NA	NA	NA	NA	NA	NA	81.5706	NA	31.9568
QC_ESTD100nM_LILY_rpMS1_posneg_1	DG	DG 34:1	ESTD	14.4	C37H70O5	41.4932	-1.03827	66.8771	NA	NA	NA	NA	NA	NA	81.5706	-0.431748	96.4088
QC_ESTD100nM_LILY_rpMS1_posneg_1	DG	DG 36:0	Analyte	15.8	C39H76O5	41.4932	NA	27.536	NA	NA	NA	NA	NA	NA	81.5706	NA	46.7769
QC_ESTD100nM_LILY_rpMS1_posneg_1	DG	DG 36:2	ESTD	14.5	C39H72O5	41.4932	-1.52589	49.0566	NA	NA	NA	NA	NA	NA	81.5706	-0.511262	95.2581
QC_ESTD100nM_LILY_rpMS1_posneg_1	DG	DG 38:4	ESTD	14.4	C41H72O5	41.4932	NA	62.718	NA	NA	NA	NA	NA	NA	81.5706	NA	119.099
QC_ESTD100nM_LILY_rpMS1_posneg_1	DG	DG 40:6	ESTD	14.1	C43H72O5	41.4932	NA	56.662	NA	NA	NA	NA	NA	NA	81.5706	NA	100.843
QC_ESTD100nM_LILY_rpMS1_posneg_1	HexCer	HexCer 42:2;2	ESTD	14.5	C48 H91 O8 N1	NA	NA	103.729	NA	NA	NA	NA	NA	NA	NA	NA	91.2939
QC_ESTD100nM_LILY_rpMS1_posneg_1	LPC	LPC 14:0	Analyte	2.2	C22H46NO7P	NA	NA	NA	NA	NA	NA	NA	NA	NA	65.7659	1.93593	3.05103
QC_ESTD100nM_LILY_rpMS1_posneg_1	LPC	LPC 16:0	ESTD	2.8	C24H50NO7P	286.248	25.2734	258.682	NA	NA	NA	64.7639	-0.0675593	68.3507	65.7659	-0.229256	72.1842
QC_ESTD100nM_LILY_rpMS1_posneg_1	LPC	LPC 18:0	ESTD	3.6	C26H54NO7P	286.248	29.2932	161.104	NA	NA	NA	64.7639	-1.52189	64.2747	65.7659	1.6445	64.7536
QC_ESTD100nM_LILY_rpMS1_posneg_1	LPC	LPC 18:1	DeutISTD	2.8	C26H52NO7P	NA	NA	NA	NA	NA	NA	NA	NA	NA	65.7659	-1.00776	2.83478
QC_ESTD100nM_LILY_rpMS1_posneg_1	LPE	LPE 18:0	ESTD	3.8	H48C23NO7P	NA	NA	NA	NA	NA	NA	107.506	0.708065	68.9508	100.734	0.827119	62.6799
QC_ESTD100nM_LILY_rpMS1_posneg_1	PC	PC 32:0	ESTD	11.9	C40H80NO8P	NA	4.84221	31.7439	NA	NA	NA	84.9997	-1.82125	37.6107	95.683	-1.31431	39.2663
QC_ESTD100nM_LILY_rpMS1_posneg_1	PC	PC 34:0	ESTD	13.1	C42 H84 O8 N1 P1	NA	12.1794	76.6732	NA	NA	NA	84.9997	2.73633	50.372	95.683	3.47542	49.4931
QC_ESTD100nM_LILY_rpMS1_posneg_1	PC	PC 34:1	ESTD	12	C42H82NO8P	NA	-1.40658	19.2183	NA	NA	NA	84.9997	-2.12067	25.2278	95.683	-1.78146	26.6152
QC_ESTD100nM_LILY_rpMS1_posneg_1	PC	PC 34:2	ESTD	10.7	C42H80NO8P	NA	-0.55428	11.5512	NA	NA	NA	84.9997	0.730053	26.1908	95.683	0.648908	24.4542
QC_ESTD100nM_LILY_rpMS1_posneg_1	PC	PC 36:0	ESTD	14.1	H88C44NO8P	NA	NA	133.565	NA	NA	NA	84.9997	-0.0242568	82.1139	95.683	-0.0953893	77.9109
QC_ESTD100nM_LILY_rpMS1_posneg_1	PC	PC 36:1	ESTD	13.2	H86C44NO8P	NA	14.5145	167.322	NA	NA	NA	84.9997	2.64183	97.1503	95.683	2.93474	93.5999
QC_ESTD100nM_LILY_rpMS1_posneg_1	PC	PC 36:2	ESTD	12.4	C44H84NO8P	NA	3.24856	165.344	NA	NA	NA	84.9997	1.05921	201.465	95.683	3.66254	182.695
QC_ESTD100nM_LILY_rpMS1_posneg_1	PC	PC 36:5	Analyte	9	H78C44NO8P	NA	NA	NA	NA	NA	NA	NA	NA	NA	95.683	1.55178	18.4261
QC_ESTD100nM_LILY_rpMS1_posneg_1	PC	PC 38:1	Analyte	14.1	C46 H90 O8 N1 P1	NA	NA	NA	NA	NA	NA	NA	NA	NA	95.683	NA	5.37428
QC_ESTD100nM_LILY_rpMS1_posneg_1	PC	PC 38:4	ESTD	12.1	H84C46NO8P	NA	NA	NA	NA	NA	NA	84.9997	-1.08889	95.6001	95.683	0.634849	86.9753
QC_ESTD100nM_LILY_rpMS1_posneg_1	PC	PC 38:6	ESTD	9.8	C46H80NO8P	NA	-2.71622	54.541	NA	NA	NA	84.9997	3.19735	92.1994	95.683	3.80588	99.5309
QC_ESTD100nM_LILY_rpMS1_posneg_1	PC	PC 40:0	ESTD	15.6	C48 H96 O8 N1 P1	NA	NA	118.658	NA	NA	NA	NA	NA	NA	95.683	NA	60.4609
QC_ESTD100nM_LILY_rpMS1_posneg_1	PC	PC 40:6	ESTD	11.7	C48H84NO8P	NA	NA	NA	NA	NA	NA	NA	NA	NA	95.683	-0.0662809	77.6111
QC_ESTD100nM_LILY_rpMS1_posneg_1	PC	PC P-32:1	Analyte	11.4	C40H78NO7P	NA	NA	NA	NA	NA	NA	NA	NA	NA	95.683	7.00308	5.58809
QC_ESTD100nM_LILY_rpMS1_posneg_1	PE	PE 34:1	ESTD	12.5	C39H76NO8P	60.2939	4.20324	22.0183	201.817	9.11455	20.4928	116.707	2.72247	19.1392	146.568	2.06938	23.437
QC_ESTD100nM_LILY_rpMS1_posneg_1	PE	PE 36:2	ESTD	12.7	C41H78NO8P	60.2939	0.921812	30.916	NA	NA	NA	NA	NA	NA	146.568	-1.78449	29.3305
QC_ESTD100nM_LILY_rpMS1_posneg_1	PS	PS 36:2	ESTD	11.3	C42H78NO10P	NA	NA	NA	NA	NA	NA	NA	NA	78.0875	46.9951	NA	67.1323
QC_ESTD100nM_LILY_rpMS1_posneg_1	SPH	SPH 18:1;2	ESTD	2.4	C18H37NO2	NA	NA	NA	NA	NA	NA	NA	NA	NA	NA	NA	65.0137
QC_ESTD100nM_LILY_rpMS1_posneg_1	TG	TG 42:0	ESTD	16.6	C45H86O6	42.3543	NA	43.5815	NA	NA	NA	NA	NA	NA	186.613	1.65906	86.4706
QC_ESTD100nM_LILY_rpMS1_posneg_1	TG	TG 48:0	ESTD	17.3	C51H98O6	42.3543	0.071354	45.9469	NA	NA	NA	NA	NA	NA	186.613	6.2825	91.8674
QC_ESTD100nM_LILY_rpMS1_posneg_1	TG	TG 48:3	ESTD	16.7	C51H92O6	42.3543	NA	47.7776	NA	NA	NA	NA	NA	NA	186.613	NA	86.6697
QC_ESTD100nM_LILY_rpMS1_posneg_1	TG	TG 54:3	ESTD	17.3	C57H104O6	42.3543	-0.082833	108.485	NA	NA	NA	NA	NA	NA	186.613	3.87911	281.392
QC_ESTD100nM_LILY_rpMS1_posneg_1	TG	TG 54:9	ESTD	16.1	C57H92O6	42.3543	NA	117.452	NA	NA	NA	NA	NA	NA	186.613	NA	103.994
QC_ESTD100nM_LILY_rpMS1_posneg_1	TG	TG 60:3	ESTD	17.9	C63H116O6	42.3543	NA	26.1365	NA	NA	NA	NA	NA	NA	186.613	NA	77.2708
QC_ESTD100nM_LILY_rpMS1_posneg_2	Cer	Cer 34:1;2	ESTD	12.6	C34H67NO3	NA	NA	NA	NA	NA	NA	NA	3.73008	89.4773	NA	5.27689	86.7197
QC_ESTD100nM_LILY_rpMS1_posneg_2	Cer	Cer 36:1;2	ESTD	13.7	C36H71NO3	NA	NA	NA	NA	NA	NA	NA	1.19393	82.5399	NA	NA	77.7537
QC_ESTD100nM_LILY_rpMS1_posneg_2	Cer	Cer 42:0;2	ESTD	16.1	C42H85NO3	NA	NA	NA	NA	NA	NA	NA	NA	162.876	NA	NA	126.387
QC_ESTD100nM_LILY_rpMS1_posneg_2	Cer	Cer 42:1;2	ESTD	16	C42H83NO3	NA	NA	NA	NA	NA	NA	NA	5.34878	133.333	NA	7.05206	130.458
QC_ESTD100nM_LILY_rpMS1_posneg_2	Cer	Cer 42:2;2	ESTD	15.4	C42H81NO3	NA	NA	NA	NA	NA	NA	NA	1.60065	95.4853	NA	0.292781	73.2713
QC_ESTD100nM_LILY_rpMS1_posneg_2	Co	Co Q10	ESTD	16.8	C59H90O4	NA	NA	NA	NA	NA	NA	NA	NA	NA	NA	NA	88.414
QC_ESTD100nM_LILY_rpMS1_posneg_2	DG	DG 32:0	ESTD	14.4	C35H68O5	41.4932	-1.37416	65.7528	NA	NA	NA	NA	NA	NA	81.5706	-0.983759	84.9391
QC_ESTD100nM_LILY_rpMS1_posneg_2	DG	DG 33:1	Analyte	14	C36 H68 O5	NA	NA	NA	NA	NA	NA	NA	NA	NA	81.5706	NA	17.8334
QC_ESTD100nM_LILY_rpMS1_posneg_2	DG	DG 34:0	Analyte	15.2	C37H72O5	NA	NA	NA	NA	NA	NA	NA	NA	NA	81.5706	NA	30.1067
QC_ESTD100nM_LILY_rpMS1_posneg_2	DG	DG 34:1	ESTD	14.4	C37H70O5	41.4932	-1.03827	66.6976	NA	NA	NA	NA	NA	NA	81.5706	-0.431748	96.1535
QC_ESTD100nM_LILY_rpMS1_posneg_2	DG	DG 34:3	Analyte	12.6	H66C37O5	NA	NA	NA	NA	NA	NA	NA	NA	NA	81.5706	NA	16.6934
QC_ESTD100nM_LILY_rpMS1_posneg_2	DG	DG 36:0	Analyte	15.8	C39H76O5	NA	NA	NA	NA	NA	NA	NA	NA	NA	81.5706	NA	40.6024
QC_ESTD100nM_LILY_rpMS1_posneg_2	DG	DG 36:2	ESTD	14.5	C39H72O5	41.4932	-1.52589	47.5094	NA	NA	NA	NA	NA	NA	81.5706	-0.511262	92.5593
QC_ESTD100nM_LILY_rpMS1_posneg_2	DG	DG 38:4	ESTD	14.4	C41H72O5	41.4932	NA	59.3992	NA	NA	NA	NA	NA	NA	81.5706	NA	113.299
QC_ESTD100nM_LILY_rpMS1_posneg_2	DG	DG 40:6	ESTD	14.1	C43H72O5	41.4932	NA	58.6194	NA	NA	NA	NA	NA	NA	81.5706	NA	104.096
QC_ESTD100nM_LILY_rpMS1_posneg_2	HexCer	HexCer 42:2;2	ESTD	14.5	C48 H91 O8 N1	NA	NA	94.2533	NA	NA	NA	NA	NA	NA	NA	NA	80.9213
QC_ESTD100nM_LILY_rpMS1_posneg_2	LPC	LPC 16:0	ESTD	2.8	C24H50NO7P	286.248	25.2734	238.295	NA	NA	NA	NA	NA	NA	65.7659	-0.229256	66.5141
QC_ESTD100nM_LILY_rpMS1_posneg_2	LPC	LPC 18:0	ESTD	3.6	C26H54NO7P	286.248	29.2932	142.606	NA	NA	NA	64.7639	-1.52189	62.7052	65.7659	1.6445	59.509
QC_ESTD100nM_LILY_rpMS1_posneg_2	LPC	LPC 18:1	DeutISTD	2.8	C26H52NO7P	NA	NA	NA	NA	NA	NA	NA	NA	NA	65.7659	-1.00776	2.92988
QC_ESTD100nM_LILY_rpMS1_posneg_2	LPE	LPE 18:0	ESTD	3.8	H48C23NO7P	NA	NA	NA	NA	NA	NA	107.506	0.708065	59.5674	100.734	0.827119	69.6432
QC_ESTD100nM_LILY_rpMS1_posneg_2	PC	PC 32:0	ESTD	11.9	C40H80NO8P	NA	4.84221	32.4757	NA	NA	NA	84.9997	-1.82125	39.7976	95.683	-1.31431	40.0053
QC_ESTD100nM_LILY_rpMS1_posneg_2	PC	PC 33:1	DeutISTD	11.2	C41H80NO8P	NA	NA	NA	NA	NA	NA	NA	NA	NA	95.683	6.2087	6.53419
QC_ESTD100nM_LILY_rpMS1_posneg_2	PC	PC 34:0	ESTD	13.1	C42 H84 O8 N1 P1	NA	12.1794	65.2676	NA	NA	NA	84.9997	2.73633	49.2396	95.683	3.47542	44.1761
QC_ESTD100nM_LILY_rpMS1_posneg_2	PC	PC 34:1	ESTD	12	C42H82NO8P	NA	-1.40658	18.9403	NA	NA	NA	84.9997	-2.12067	28.5201	95.683	-1.78146	26.3345
QC_ESTD100nM_LILY_rpMS1_posneg_2	PC	PC 34:2	ESTD	10.7	C42H80NO8P	NA	-0.55428	13.3817	NA	NA	NA	84.9997	0.730053	31.1483	95.683	0.648908	26.9244
QC_ESTD100nM_LILY_rpMS1_posneg_2	PC	PC 36:0	ESTD	14.1	H88C44NO8P	NA	NA	123.749	NA	NA	NA	84.9997	-0.0242568	81.9801	95.683	-0.0953893	73.3488
QC_ESTD100nM_LILY_rpMS1_posneg_2	PC	PC 36:1	ESTD	13.2	H86C44NO8P	NA	14.5145	171.904	NA	NA	NA	84.9997	2.64183	88.1339	95.683	2.93474	95.7291
QC_ESTD100nM_LILY_rpMS1_posneg_2	PC	PC 36:2	ESTD	12.4	C44H84NO8P	NA	3.24856	161.263	NA	NA	NA	84.9997	1.05921	194.818	95.683	3.66254	178.953
QC_ESTD100nM_LILY_rpMS1_posneg_2	PC	PC 36:5	Analyte	9	H78C44NO8P	NA	NA	NA	NA	NA	NA	NA	NA	NA	95.683	1.55178	18.3217
QC_ESTD100nM_LILY_rpMS1_posneg_2	PC	PC 38:1	Analyte	14.1	C46 H90 O8 N1 P1	NA	NA	NA	NA	NA	NA	NA	NA	NA	95.683	NA	5.43579
QC_ESTD100nM_LILY_rpMS1_posneg_2	PC	PC 38:4	ESTD	12.1	H84C46NO8P	NA	NA	NA	NA	NA	NA	84.9997	-1.08889	95.972	95.683	0.634849	86.0845
QC_ESTD100nM_LILY_rpMS1_posneg_2	PC	PC 38:6	ESTD	9.8	C46H80NO8P	NA	-2.71622	52.6017	NA	NA	NA	84.9997	3.19735	93.1876	95.683	3.80588	94.8839
QC_ESTD100nM_LILY_rpMS1_posneg_2	PC	PC 40:0	ESTD	15.6	C48 H96 O8 N1 P1	NA	NA	103.848	NA	NA	NA	NA	NA	NA	95.683	NA	63.4815
QC_ESTD100nM_LILY_rpMS1_posneg_2	PC	PC 40:6	ESTD	11.7	C48H84NO8P	NA	NA	NA	NA	NA	NA	NA	NA	NA	95.683	-0.0662809	75.1923
QC_ESTD100nM_LILY_rpMS1_posneg_2	PE	PE 34:1	ESTD	12.5	C39H76NO8P	60.2939	4.20324	16.4598	201.817	9.11455	20.0325	116.707	2.72247	19.1164	146.568	2.06938	18.9821
QC_ESTD100nM_LILY_rpMS1_posneg_2	PE	PE 36:2	ESTD	12.7	C41H78NO8P	60.2939	0.921812	31.3806	NA	NA	NA	NA	NA	NA	146.568	-1.78449	29.6302
QC_ESTD100nM_LILY_rpMS1_posneg_2	PS	PS 36:2	ESTD	11.3	C42H78NO10P	NA	NA	NA	NA	NA	NA	NA	NA	46.5605	46.9951	NA	51.0622
QC_ESTD100nM_LILY_rpMS1_posneg_2	SPH	SPH 18:1;2	ESTD	2.4	C18H37NO2	NA	NA	NA	NA	NA	NA	NA	NA	NA	NA	NA	78.9516
QC_ESTD100nM_LILY_rpMS1_posneg_2	TG	TG 42:0	ESTD	16.6	C45H86O6	42.3543	NA	43.9634	NA	NA	NA	NA	NA	NA	186.613	1.65906	82.454
QC_ESTD100nM_LILY_rpMS1_posneg_2	TG	TG 48:0	ESTD	17.3	C51H98O6	42.3543	0.071354	45.1977	NA	NA	NA	NA	NA	NA	186.613	6.2825	85.1327
QC_ESTD100nM_LILY_rpMS1_posneg_2	TG	TG 48:3	ESTD	16.7	C51H92O6	42.3543	NA	49.1489	NA	NA	NA	NA	NA	NA	186.613	NA	92.9994
QC_ESTD100nM_LILY_rpMS1_posneg_2	TG	TG 54:3	ESTD	17.3	C57H104O6	42.3543	-0.082833	106.559	NA	NA	NA	NA	NA	NA	186.613	3.87911	276.544
QC_ESTD100nM_LILY_rpMS1_posneg_2	TG	TG 54:9	ESTD	16.1	C57H92O6	42.3543	NA	107.086	NA	NA	NA	NA	NA	NA	186.613	NA	94.5157
QC_ESTD100nM_LILY_rpMS1_posneg_2	TG	TG 60:3	ESTD	17.9	C63H116O6	42.3543	NA	23.866	NA	NA	NA	NA	NA	NA	186.613	NA	73.7912
QC_ESTD100nM_LILY_rpMS1_posneg_3	Cer	Cer 34:1;2	ESTD	12.6	C34H67NO3	NA	NA	NA	NA	NA	NA	NA	3.73008	94.1134	NA	5.27689	86.6122
QC_ESTD100nM_LILY_rpMS1_posneg_3	Cer	Cer 36:1;2	ESTD	13.7	C36H71NO3	NA	NA	NA	NA	NA	NA	NA	1.19393	80.413	NA	NA	85.7172
QC_ESTD100nM_LILY_rpMS1_posneg_3	Cer	Cer 42:0;2	ESTD	16.1	C42H85NO3	NA	NA	NA	NA	NA	NA	NA	NA	136.592	NA	NA	150.197
QC_ESTD100nM_LILY_rpMS1_posneg_3	Cer	Cer 42:1;2	ESTD	16	C42H83NO3	NA	NA	NA	NA	NA	NA	NA	5.34878	124.835	NA	7.05206	133.347
QC_ESTD100nM_LILY_rpMS1_posneg_3	Cer	Cer 42:2;2	ESTD	15.4	C42H81NO3	NA	NA	NA	NA	NA	NA	NA	1.60065	87.5182	NA	0.292781	75.7192
QC_ESTD100nM_LILY_rpMS1_posneg_3	Co	Co Q10	ESTD	16.8	C59H90O4	NA	NA	NA	NA	NA	NA	NA	NA	NA	NA	NA	111.025
QC_ESTD100nM_LILY_rpMS1_posneg_3	DG	DG 32:0	ESTD	14.4	C35H68O5	41.4932	-1.37416	59.5392	NA	NA	NA	NA	NA	NA	81.5706	-0.983759	72.1838
QC_ESTD100nM_LILY_rpMS1_posneg_3	DG	DG 33:1	Analyte	14	C36 H68 O5	NA	NA	NA	NA	NA	NA	NA	NA	NA	81.5706	NA	17.6342
QC_ESTD100nM_LILY_rpMS1_posneg_3	DG	DG 34:0	Analyte	15.2	C37H72O5	NA	NA	NA	NA	NA	NA	NA	NA	NA	81.5706	NA	35.1298
QC_ESTD100nM_LILY_rpMS1_posneg_3	DG	DG 34:1	ESTD	14.4	C37H70O5	41.4932	-1.03827	62.2199	NA	NA	NA	NA	NA	NA	81.5706	-0.431748	89.7869
QC_ESTD100nM_LILY_rpMS1_posneg_3	DG	DG 34:3	Analyte	12.6	H66C37O5	NA	NA	NA	NA	NA	NA	NA	NA	NA	81.5706	NA	16.3554
QC_ESTD100nM_LILY_rpMS1_posneg_3	DG	DG 36:0	Analyte	15.8	C39H76O5	41.4932	NA	29.4148	NA	NA	NA	NA	NA	NA	81.5706	NA	49.1598
QC_ESTD100nM_LILY_rpMS1_posneg_3	DG	DG 36:2	ESTD	14.5	C39H72O5	41.4932	-1.52589	48.0744	NA	NA	NA	NA	NA	NA	81.5706	-0.511262	93.5448
QC_ESTD100nM_LILY_rpMS1_posneg_3	DG	DG 38:4	ESTD	14.4	C41H72O5	41.4932	NA	63.2319	NA	NA	NA	NA	NA	NA	81.5706	NA	119.994
QC_ESTD100nM_LILY_rpMS1_posneg_3	DG	DG 40:6	ESTD	14.1	C43H72O5	41.4932	NA	54.4024	NA	NA	NA	NA	NA	NA	81.5706	NA	97.0883
QC_ESTD100nM_LILY_rpMS1_posneg_3	HexCer	HexCer 42:2;2	ESTD	14.5	C48 H91 O8 N1	NA	NA	89.9454	NA	NA	NA	NA	NA	NA	NA	NA	80.8348
QC_ESTD100nM_LILY_rpMS1_posneg_3	LPC	LPC 16:0	ESTD	2.8	C24H50NO7P	286.248	25.2734	237.262	NA	NA	NA	64.7639	-0.0675593	71.8697	65.7659	-0.229256	66.0461
QC_ESTD100nM_LILY_rpMS1_posneg_3	LPC	LPC 18:0	ESTD	3.6	C26H54NO7P	286.248	29.2932	145.078	NA	NA	NA	64.7639	-1.52189	63.6776	65.7659	1.6445	63.317
QC_ESTD100nM_LILY_rpMS1_posneg_3	LPC	LPC 18:1	DeutISTD	2.8	C26H52NO7P	NA	NA	NA	NA	NA	NA	NA	NA	NA	65.7659	-1.00776	2.84649
QC_ESTD100nM_LILY_rpMS1_posneg_3	LPC	LPC 18:2	Analyte	2.4	H50C26NO7P	NA	NA	NA	NA	NA	NA	NA	NA	NA	65.7659	0.28858	3.31902
QC_ESTD100nM_LILY_rpMS1_posneg_3	LPE	LPE 18:0	ESTD	3.8	H48C23NO7P	NA	NA	NA	NA	NA	NA	107.506	0.708065	64.6606	100.734	0.827119	72.0927
QC_ESTD100nM_LILY_rpMS1_posneg_3	PC	PC 32:0	ESTD	11.9	C40H80NO8P	NA	4.84221	31.1104	NA	NA	NA	84.9997	-1.82125	41.1052	95.683	-1.31431	38.6264
QC_ESTD100nM_LILY_rpMS1_posneg_3	PC	PC 33:1	DeutISTD	11.2	C41H80NO8P	NA	NA	NA	NA	NA	NA	NA	NA	NA	95.683	6.2087	6.82385
QC_ESTD100nM_LILY_rpMS1_posneg_3	PC	PC 34:0	ESTD	13.1	C42 H84 O8 N1 P1	NA	12.1794	80.4177	NA	NA	NA	84.9997	2.73633	50.6008	95.683	3.47542	51.2386
QC_ESTD100nM_LILY_rpMS1_posneg_3	PC	PC 34:1	ESTD	12	C42H82NO8P	NA	-1.40658	19.9622	NA	NA	NA	84.9997	-2.12067	28.0405	95.683	-1.78146	27.3666
QC_ESTD100nM_LILY_rpMS1_posneg_3	PC	PC 34:2	ESTD	10.7	C42H80NO8P	NA	-0.55428	13.6464	NA	NA	NA	84.9997	0.730053	31.4323	95.683	0.648908	27.2816
QC_ESTD100nM_LILY_rpMS1_posneg_3	PC	PC 36:0	ESTD	14.1	H88C44NO8P	NA	NA	139.101	NA	NA	NA	84.9997	-0.0242568	87.019	95.683	-0.0953893	80.4836
QC_ESTD100nM_LILY_rpMS1_posneg_3	PC	PC 36:1	ESTD	13.2	H86C44NO8P	NA	14.5145	172.882	NA	NA	NA	84.9997	2.64183	99.0369	95.683	2.93474	96.1839
QC_ESTD100nM_LILY_rpMS1_posneg_3	PC	PC 36:2	ESTD	12.4	C44H84NO8P	NA	3.24856	162.091	NA	NA	NA	84.9997	1.05921	189.529	95.683	3.66254	179.713
QC_ESTD100nM_LILY_rpMS1_posneg_3	PC	PC 36:5	Analyte	9	H78C44NO8P	NA	NA	NA	NA	NA	NA	NA	NA	NA	95.683	1.55178	18.2598
QC_ESTD100nM_LILY_rpMS1_posneg_3	PC	PC 38:1	Analyte	14.1	C46 H90 O8 N1 P1	NA	NA	NA	NA	NA	NA	NA	NA	NA	95.683	NA	5.57459
QC_ESTD100nM_LILY_rpMS1_posneg_3	PC	PC 38:4	ESTD	12.1	H84C46NO8P	NA	NA	NA	NA	NA	NA	84.9997	-1.08889	94.4217	95.683	0.634849	82.2217
QC_ESTD100nM_LILY_rpMS1_posneg_3	PC	PC 38:6	ESTD	9.8	C46H80NO8P	NA	-2.71622	44.7447	NA	NA	NA	84.9997	3.19735	97.5527	95.683	3.80588	92.5462
QC_ESTD100nM_LILY_rpMS1_posneg_3	PC	PC 40:0	ESTD	15.6	C48 H96 O8 N1 P1	NA	NA	117.796	NA	NA	NA	NA	NA	NA	95.683	NA	63.5955
QC_ESTD100nM_LILY_rpMS1_posneg_3	PC	PC 40:6	ESTD	11.7	C48H84NO8P	NA	NA	NA	NA	NA	NA	NA	NA	NA	95.683	-0.0662809	77.2005
QC_ESTD100nM_LILY_rpMS1_posneg_3	PE	PE 34:1	ESTD	12.5	C39H76NO8P	60.2939	4.20324	18.6453	201.817	9.11455	19.7035	116.707	2.72247	17.5999	146.568	2.06938	20.7337
QC_ESTD100nM_LILY_rpMS1_posneg_3	PE	PE 36:2	ESTD	12.7	C41H78NO8P	60.2939	0.921812	30.5321	NA	NA	NA	NA	NA	NA	146.568	-1.78449	29.0828
QC_ESTD100nM_LILY_rpMS1_posneg_3	PS	PS 36:2	ESTD	11.3	C42H78NO10P	NA	NA	NA	NA	NA	NA	NA	NA	44.6256	46.9951	NA	44.7687
QC_ESTD100nM_LILY_rpMS1_posneg_3	SPH	SPH 18:1;2	ESTD	2.4	C18H37NO2	NA	NA	NA	NA	NA	NA	NA	NA	NA	NA	NA	55.5483
QC_ESTD100nM_LILY_rpMS1_posneg_3	TG	TG 42:0	ESTD	16.6	C45H86O6	42.3543	NA	42.3383	NA	NA	NA	NA	NA	NA	186.613	1.65906	89.1622
QC_ESTD100nM_LILY_rpMS1_posneg_3	TG	TG 48:0	ESTD	17.3	C51H98O6	42.3543	0.071354	43.6389	NA	NA	NA	NA	NA	NA	186.613	6.2825	92.2993
QC_ESTD100nM_LILY_rpMS1_posneg_3	TG	TG 48:3	ESTD	16.7	C51H92O6	42.3543	NA	46.6728	NA	NA	NA	NA	NA	NA	186.613	NA	79.4861
QC_ESTD100nM_LILY_rpMS1_posneg_3	TG	TG 54:3	ESTD	17.3	C57H104O6	42.3543	-0.082833	107.048	NA	NA	NA	NA	NA	NA	186.613	3.87911	277.774
QC_ESTD100nM_LILY_rpMS1_posneg_3	TG	TG 54:9	ESTD	16.1	C57H92O6	42.3543	NA	106.404	NA	NA	NA	NA	NA	NA	186.613	NA	93.892
QC_ESTD100nM_LILY_rpMS1_posneg_3	TG	TG 60:3	ESTD	17.9	C63H116O6	42.3543	NA	26.2928	NA	NA	NA	NA	NA	NA	186.613	NA	84.3565
QC_ESTD100nM_LILY_rpMS1_posneg_4	Cer	Cer 34:1;2	ESTD	12.6	C34H67NO3	NA	NA	NA	NA	NA	NA	NA	3.73008	92.6584	NA	5.27689	104.055
QC_ESTD100nM_LILY_rpMS1_posneg_4	Cer	Cer 36:1;2	ESTD	13.7	C36H71NO3	NA	NA	NA	NA	NA	NA	NA	1.19393	95.2682	NA	NA	85.8524
QC_ESTD100nM_LILY_rpMS1_posneg_4	Cer	Cer 42:0;2	ESTD	16.1	C42H85NO3	NA	NA	NA	NA	NA	NA	NA	NA	167.126	NA	NA	142.91
QC_ESTD100nM_LILY_rpMS1_posneg_4	Cer	Cer 42:1;2	ESTD	16	C42H83NO3	NA	NA	NA	NA	NA	NA	NA	5.34878	150.336	NA	7.05206	144.978
QC_ESTD100nM_LILY_rpMS1_posneg_4	Cer	Cer 42:2;2	ESTD	15.4	C42H81NO3	NA	NA	NA	NA	NA	NA	NA	1.60065	98.2824	NA	0.292781	86.7142
QC_ESTD100nM_LILY_rpMS1_posneg_4	Co	Co Q10	ESTD	16.8	C59H90O4	NA	NA	NA	NA	NA	NA	NA	NA	NA	NA	NA	122.748
QC_ESTD100nM_LILY_rpMS1_posneg_4	DG	DG 32:0	ESTD	14.4	C35H68O5	41.4932	-1.37416	57.0874	NA	NA	NA	NA	NA	NA	81.5706	-0.983759	79.6786
QC_ESTD100nM_LILY_rpMS1_posneg_4	DG	DG 34:0	Analyte	15.2	C37H72O5	NA	NA	NA	NA	NA	NA	NA	NA	NA	81.5706	NA	34.8718
QC_ESTD100nM_LILY_rpMS1_posneg_4	DG	DG 34:1	ESTD	14.4	C37H70O5	41.4932	-1.03827	62.6644	NA	NA	NA	NA	NA	NA	81.5706	-0.431748	90.4188
QC_ESTD100nM_LILY_rpMS1_posneg_4	DG	DG 34:3	Analyte	12.6	H66C37O5	NA	NA	NA	NA	NA	NA	NA	NA	NA	81.5706	NA	19.1738
QC_ESTD100nM_LILY_rpMS1_posneg_4	DG	DG 36:0	Analyte	15.8	C39H76O5	41.4932	NA	30.6561	NA	NA	NA	NA	NA	NA	81.5706	NA	50.7341
QC_ESTD100nM_LILY_rpMS1_posneg_4	DG	DG 36:2	ESTD	14.5	C39H72O5	41.4932	-1.52589	52.8731	NA	NA	NA	NA	NA	NA	81.5706	-0.511262	101.915
QC_ESTD100nM_LILY_rpMS1_posneg_4	DG	DG 38:4	ESTD	14.4	C41H72O5	41.4932	NA	64.3015	NA	NA	NA	NA	NA	NA	81.5706	NA	121.857
QC_ESTD100nM_LILY_rpMS1_posneg_4	DG	DG 40:6	ESTD	14.1	C43H72O5	41.4932	NA	58.0881	NA	NA	NA	NA	NA	NA	81.5706	NA	103.213
QC_ESTD100nM_LILY_rpMS1_posneg_4	HexCer	HexCer 42:2;2	ESTD	14.5	C48 H91 O8 N1	NA	NA	101.861	NA	NA	NA	NA	NA	NA	NA	NA	87.1437
QC_ESTD100nM_LILY_rpMS1_posneg_4	LPC	LPC 16:0	ESTD	2.8	C24H50NO7P	286.248	25.2734	229.639	NA	NA	NA	64.7639	-0.0675593	75.7069	65.7659	-0.229256	67.3194
QC_ESTD100nM_LILY_rpMS1_posneg_4	LPC	LPC 18:0	ESTD	3.6	C26H54NO7P	286.248	29.2932	154.34	NA	NA	NA	64.7639	-1.52189	62.5093	65.7659	1.6445	71.5846
QC_ESTD100nM_LILY_rpMS1_posneg_4	LPC	LPC 18:2	Analyte	2.4	H50C26NO7P	NA	NA	NA	NA	NA	NA	NA	NA	NA	65.7659	0.28858	2.90275
QC_ESTD100nM_LILY_rpMS1_posneg_4	LPE	LPE 18:0	ESTD	3.8	H48C23NO7P	NA	NA	NA	NA	NA	NA	107.506	0.708065	65.444	100.734	0.827119	70.5228
QC_ESTD100nM_LILY_rpMS1_posneg_4	PC	PC 32:0	ESTD	11.9	C40H80NO8P	NA	4.84221	31.5013	NA	NA	NA	84.9997	-1.82125	38.3328	95.683	-1.31431	39.0212
QC_ESTD100nM_LILY_rpMS1_posneg_4	PC	PC 33:1	DeutISTD	11.2	C41H80NO8P	NA	NA	NA	NA	NA	NA	NA	NA	NA	95.683	6.2087	6.03515
QC_ESTD100nM_LILY_rpMS1_posneg_4	PC	PC 34:0	ESTD	13.1	C42 H84 O8 N1 P1	NA	12.1794	78.8396	NA	NA	NA	84.9997	2.73633	49.394	95.683	3.47542	50.503
QC_ESTD100nM_LILY_rpMS1_posneg_4	PC	PC 34:1	ESTD	12	C42H82NO8P	NA	-1.40658	19.5646	NA	NA	NA	84.9997	-2.12067	25.2125	95.683	-1.78146	26.9651
QC_ESTD100nM_LILY_rpMS1_posneg_4	PC	PC 34:2	ESTD	10.7	C42H80NO8P	NA	-0.55428	12.6156	NA	NA	NA	84.9997	0.730053	27.5811	95.683	0.648908	25.8905
QC_ESTD100nM_LILY_rpMS1_posneg_4	PC	PC 35:0	Analyte	13.6	C43 H86 O8 N1 P1	NA	NA	NA	NA	NA	NA	NA	NA	NA	95.683	NA	4.73925
QC_ESTD100nM_LILY_rpMS1_posneg_4	PC	PC 36:0	ESTD	14.1	H88C44NO8P	NA	NA	142.28	NA	NA	NA	84.9997	-0.0242568	85.5982	95.683	-0.0953893	81.9612
QC_ESTD100nM_LILY_rpMS1_posneg_4	PC	PC 36:1	ESTD	13.2	H86C44NO8P	NA	14.5145	193.066	NA	NA	NA	84.9997	2.64183	95.4518	95.683	2.93474	105.564
QC_ESTD100nM_LILY_rpMS1_posneg_4	PC	PC 36:2	ESTD	12.4	C44H84NO8P	NA	3.24856	161.995	NA	NA	NA	84.9997	1.05921	194.023	95.683	3.66254	179.625
QC_ESTD100nM_LILY_rpMS1_posneg_4	PC	PC 36:5	Analyte	9	H78C44NO8P	NA	NA	NA	NA	NA	NA	NA	NA	NA	95.683	1.55178	18.593
QC_ESTD100nM_LILY_rpMS1_posneg_4	PC	PC 38:1	Analyte	14.1	C46 H90 O8 N1 P1	NA	NA	NA	NA	NA	NA	NA	NA	NA	95.683	NA	5.38368
QC_ESTD100nM_LILY_rpMS1_posneg_4	PC	PC 38:4	ESTD	12.1	H84C46NO8P	NA	NA	NA	NA	NA	NA	84.9997	-1.08889	97.1278	95.683	0.634849	87.5276
QC_ESTD100nM_LILY_rpMS1_posneg_4	PC	PC 38:6	ESTD	9.8	C46H80NO8P	NA	-2.71622	50.4916	NA	NA	NA	84.9997	3.19735	92.0593	95.683	3.80588	95.9767
QC_ESTD100nM_LILY_rpMS1_posneg_4	PC	PC 40:0	ESTD	15.6	C48 H96 O8 N1 P1	NA	NA	129.508	NA	NA	NA	NA	NA	NA	95.683	NA	72.6637
QC_ESTD100nM_LILY_rpMS1_posneg_4	PC	PC 40:6	ESTD	11.7	C48H84NO8P	NA	NA	NA	NA	NA	NA	NA	NA	NA	95.683	-0.0662809	76.9701
QC_ESTD100nM_LILY_rpMS1_posneg_4	PE	PE 34:1	ESTD	12.5	C39H76NO8P	60.2939	4.20324	19.8252	201.817	9.11455	22.3657	116.707	2.72247	20.5416	146.568	2.06938	21.6793
QC_ESTD100nM_LILY_rpMS1_posneg_4	PE	PE 36:2	ESTD	12.7	C41H78NO8P	60.2939	0.921812	32.47	NA	NA	NA	NA	NA	NA	146.568	-1.78449	30.333
QC_ESTD100nM_LILY_rpMS1_posneg_4	PE	PE P-38:4	Analyte	13.2	C43H78NO7P	60.2939	12.207	5.88969	NA	NA	NA	NA	NA	NA	146.568	4.19781	7.18779
QC_ESTD100nM_LILY_rpMS1_posneg_4	PS	PS 36:2	ESTD	11.3	C42H78NO10P	NA	NA	NA	NA	NA	NA	NA	NA	46.4065	46.9951	NA	48.7983
QC_ESTD100nM_LILY_rpMS1_posneg_4	SPH	SPH 18:1;2	ESTD	2.4	C18H37NO2	NA	NA	NA	NA	NA	NA	NA	NA	NA	NA	NA	76.7466
QC_ESTD100nM_LILY_rpMS1_posneg_4	TG	TG 42:0	ESTD	16.6	C45H86O6	42.3543	NA	42.9293	NA	NA	NA	NA	NA	NA	186.613	1.65906	83.721
QC_ESTD100nM_LILY_rpMS1_posneg_4	TG	TG 48:0	ESTD	17.3	C51H98O6	42.3543	0.071354	46.3127	NA	NA	NA	NA	NA	NA	186.613	6.2825	91.341
QC_ESTD100nM_LILY_rpMS1_posneg_4	TG	TG 48:3	ESTD	16.7	C51H92O6	42.3543	NA	46.5209	NA	NA	NA	NA	NA	NA	186.613	NA	86.781
QC_ESTD100nM_LILY_rpMS1_posneg_4	TG	TG 54:3	ESTD	17.3	C57H104O6	42.3543	-0.082833	103.444	NA	NA	NA	NA	NA	NA	186.613	3.87911	268.702
QC_ESTD100nM_LILY_rpMS1_posneg_4	TG	TG 54:9	ESTD	16.1	C57H92O6	42.3543	NA	102.813	NA	NA	NA	NA	NA	NA	186.613	NA	90.608
QC_ESTD100nM_LILY_rpMS1_posneg_4	TG	TG 60:3	ESTD	17.9	C63H116O6	42.3543	NA	24.1562	NA	NA	NA	NA	NA	NA	186.613	NA	71.3406
QC_ESTD10nM_LILY_rpMS1_posneg_1	Cer	Cer 34:1;2	ESTD	12.6	C34H67NO3	NA	NA	NA	NA	NA	NA	NA	3.73008	12.897	NA	5.27689	9.72926
QC_ESTD10nM_LILY_rpMS1_posneg_1	Cer	Cer 36:1;2	ESTD	13.7	C36H71NO3	NA	NA	NA	NA	NA	NA	NA	1.19393	8.69999	NA	NA	9.89381
QC_ESTD10nM_LILY_rpMS1_posneg_1	Cer	Cer 42:0;2	ESTD	16.1	C42H85NO3	NA	NA	NA	NA	NA	NA	NA	NA	13.115	NA	NA	18.0523
QC_ESTD10nM_LILY_rpMS1_posneg_1	Cer	Cer 42:1;2	ESTD	16	C42H83NO3	NA	NA	NA	NA	NA	NA	NA	5.34878	9.49303	NA	7.05206	17.8333
QC_ESTD10nM_LILY_rpMS1_posneg_1	Co	Co Q10	ESTD	16.8	C59H90O4	NA	NA	NA	NA	NA	NA	NA	NA	NA	NA	NA	12.8418
QC_ESTD10nM_LILY_rpMS1_posneg_1	DG	DG 32:0	ESTD	14.4	C35H68O5	NA	NA	NA	NA	NA	NA	NA	NA	NA	81.5706	-0.983759	35.2723
QC_ESTD10nM_LILY_rpMS1_posneg_1	DG	DG 32:2	Analyte	12.5	H64C35O5	NA	NA	NA	NA	NA	NA	NA	NA	NA	81.5706	NA	10.7369
QC_ESTD10nM_LILY_rpMS1_posneg_1	DG	DG 34:0	Analyte	15.2	C37H72O5	NA	NA	NA	NA	NA	NA	NA	NA	NA	81.5706	NA	34.9579
QC_ESTD10nM_LILY_rpMS1_posneg_1	DG	DG 36:0	Analyte	15.8	C39H76O5	41.4932	NA	25.4006	NA	NA	NA	NA	NA	NA	81.5706	NA	44.0685
QC_ESTD10nM_LILY_rpMS1_posneg_1	DG	DG 38:4	ESTD	14.4	C41H72O5	NA	NA	NA	NA	NA	NA	NA	NA	NA	81.5706	NA	24.6501
QC_ESTD10nM_LILY_rpMS1_posneg_1	DG	DG 40:6	ESTD	14.1	C43H72O5	NA	NA	NA	NA	NA	NA	NA	NA	NA	81.5706	NA	10.6014
QC_ESTD10nM_LILY_rpMS1_posneg_1	LPC	LPC 16:0	ESTD	2.8	C24H50NO7P	NA	NA	NA	NA	NA	NA	NA	NA	NA	65.7659	-0.229256	18.3087
QC_ESTD10nM_LILY_rpMS1_posneg_1	LPC	LPC 18:0	ESTD	3.6	C26H54NO7P	NA	NA	NA	NA	NA	NA	64.7639	-1.52189	43.0014	65.7659	1.6445	19.9614
QC_ESTD10nM_LILY_rpMS1_posneg_1	LPC	LPC 18:1	DeutISTD	2.8	C26H52NO7P	NA	NA	NA	NA	NA	NA	NA	NA	NA	65.7659	-1.00776	2.80996
QC_ESTD10nM_LILY_rpMS1_posneg_1	LPC	LPC 18:2	Analyte	2.4	H50C26NO7P	NA	NA	NA	NA	NA	NA	NA	NA	NA	65.7659	0.28858	3.40791
QC_ESTD10nM_LILY_rpMS1_posneg_1	PC	PC 33:1	DeutISTD	11.2	C41H80NO8P	NA	NA	NA	NA	NA	NA	NA	NA	NA	95.683	6.2087	5.7054
QC_ESTD10nM_LILY_rpMS1_posneg_1	PC	PC 34:0	ESTD	13.1	C42 H84 O8 N1 P1	NA	NA	NA	NA	NA	NA	NA	NA	NA	95.683	3.47542	7.65811
QC_ESTD10nM_LILY_rpMS1_posneg_1	PC	PC 36:0	ESTD	14.1	H88C44NO8P	NA	NA	NA	NA	NA	NA	NA	NA	NA	95.683	-0.0953893	12.3638
QC_ESTD10nM_LILY_rpMS1_posneg_1	PC	PC 36:1	ESTD	13.2	H86C44NO8P	NA	NA	NA	NA	NA	NA	NA	NA	NA	95.683	2.93474	11.2835
QC_ESTD10nM_LILY_rpMS1_posneg_1	PC	PC 36:2	ESTD	12.4	C44H84NO8P	NA	NA	NA	NA	NA	NA	NA	NA	NA	95.683	3.66254	38.5698
QC_ESTD10nM_LILY_rpMS1_posneg_1	PC	PC 40:0	ESTD	15.6	C48 H96 O8 N1 P1	NA	NA	NA	NA	NA	NA	NA	NA	NA	95.683	NA	13.7681
QC_ESTD10nM_LILY_rpMS1_posneg_1	PC	PC 40:6	ESTD	11.7	C48H84NO8P	NA	0.494661	9.89026	NA	NA	NA	NA	NA	NA	95.683	-0.0662809	36.8421
QC_ESTD10nM_LILY_rpMS1_posneg_1	PE	PE 34:1	ESTD	12.5	C39H76NO8P	60.2939	4.20324	7.52263	NA	NA	NA	NA	NA	NA	146.568	2.06938	10.0551
QC_ESTD10nM_LILY_rpMS1_posneg_1	PE	PE 36:2	ESTD	12.7	C41H78NO8P	60.2939	0.921812	3.25393	NA	NA	NA	NA	NA	NA	146.568	-1.78449	6.26925
QC_ESTD10nM_LILY_rpMS1_posneg_1	PS	PS 36:2	ESTD	11.3	C42H78NO10P	NA	NA	NA	NA	NA	NA	NA	NA	25.6862	46.9951	NA	39.7749
QC_ESTD10nM_LILY_rpMS1_posneg_1	TG	TG 48:3	ESTD	16.7	C51H92O6	NA	NA	NA	NA	NA	NA	NA	NA	NA	186.613	NA	13.4766
QC_ESTD10nM_LILY_rpMS1_posneg_1	TG	TG 54:9	ESTD	16.1	C57H92O6	NA	NA	NA	NA	NA	NA	NA	NA	NA	186.613	NA	16.1146
QC_ESTD10nM_LILY_rpMS1_posneg_2	Cer	Cer 34:1;2	ESTD	12.6	C34H67NO3	NA	NA	NA	NA	NA	NA	NA	3.73008	10.1278	NA	5.27689	10.245
QC_ESTD10nM_LILY_rpMS1_posneg_2	Cer	Cer 42:0;2	ESTD	16.1	C42H85NO3	NA	NA	NA	NA	NA	NA	NA	NA	16.4535	NA	NA	17.1208
QC_ESTD10nM_LILY_rpMS1_posneg_2	Cer	Cer 42:1;2	ESTD	16	C42H83NO3	NA	NA	NA	NA	NA	NA	NA	5.34878	12.4823	NA	7.05206	16.7049
QC_ESTD10nM_LILY_rpMS1_posneg_2	Co	Co Q10	ESTD	16.8	C59H90O4	NA	NA	NA	NA	NA	NA	NA	NA	NA	NA	NA	10.0999
QC_ESTD10nM_LILY_rpMS1_posneg_2	DG	DG 30:0	Analyte	13.4	C33 H64 O5	NA	NA	NA	NA	NA	NA	NA	NA	NA	81.5706	-2.07379	17.5367
QC_ESTD10nM_LILY_rpMS1_posneg_2	DG	DG 32:0	ESTD	14.4	C35H68O5	NA	NA	NA	NA	NA	NA	NA	NA	NA	81.5706	-0.983759	29.2413
QC_ESTD10nM_LILY_rpMS1_posneg_2	DG	DG 34:0	Analyte	15.2	C37H72O5	41.4932	NA	26.0948	NA	NA	NA	NA	NA	NA	81.5706	NA	48.1628
QC_ESTD10nM_LILY_rpMS1_posneg_2	DG	DG 36:0	Analyte	15.8	C39H76O5	NA	NA	NA	NA	NA	NA	NA	NA	NA	81.5706	NA	36.6352
QC_ESTD10nM_LILY_rpMS1_posneg_2	DG	DG 38:4	ESTD	14.4	C41H72O5	NA	NA	NA	NA	NA	NA	NA	NA	NA	81.5706	NA	23.5115
QC_ESTD10nM_LILY_rpMS1_posneg_2	DG	DG 40:6	ESTD	14.1	C43H72O5	NA	NA	NA	NA	NA	NA	NA	NA	NA	81.5706	NA	9.69606
QC_ESTD10nM_LILY_rpMS1_posneg_2	LPC	LPC 16:0	ESTD	2.8	C24H50NO7P	NA	NA	NA	NA	NA	NA	NA	NA	NA	65.7659	-0.229256	11.3856
QC_ESTD10nM_LILY_rpMS1_posneg_2	LPC	LPC 18:0	ESTD	3.6	C26H54NO7P	NA	NA	NA	NA	NA	NA	NA	NA	NA	65.7659	1.6445	11.6227
QC_ESTD10nM_LILY_rpMS1_posneg_2	LPC	LPC 18:1	DeutISTD	2.8	C26H52NO7P	NA	NA	NA	NA	NA	NA	NA	NA	NA	65.7659	-1.00776	2.87892
QC_ESTD10nM_LILY_rpMS1_posneg_2	LPC	LPC 18:2	Analyte	2.4	H50C26NO7P	NA	NA	NA	NA	NA	NA	NA	NA	NA	65.7659	0.28858	3.17019
QC_ESTD10nM_LILY_rpMS1_posneg_2	LPC	LPC 18:3	Analyte	2.1	H48C26NO7P	NA	NA	NA	NA	NA	NA	NA	NA	NA	65.7659	6.10183	8.82576
QC_ESTD10nM_LILY_rpMS1_posneg_2	PC	PC 33:1	DeutISTD	11.2	C41H80NO8P	NA	NA	NA	NA	NA	NA	NA	NA	NA	95.683	6.2087	6.71883
QC_ESTD10nM_LILY_rpMS1_posneg_2	PC	PC 34:0	ESTD	13.1	C42 H84 O8 N1 P1	NA	NA	NA	NA	NA	NA	NA	NA	NA	95.683	3.47542	6.98479
QC_ESTD10nM_LILY_rpMS1_posneg_2	PC	PC 36:0	ESTD	14.1	H88C44NO8P	NA	NA	NA	NA	NA	NA	NA	NA	NA	95.683	-0.0953893	10.0586
QC_ESTD10nM_LILY_rpMS1_posneg_2	PC	PC 36:1	ESTD	13.2	H86C44NO8P	NA	NA	NA	NA	NA	NA	NA	NA	NA	95.683	2.93474	10.9924
QC_ESTD10nM_LILY_rpMS1_posneg_2	PC	PC 36:2	ESTD	12.4	C44H84NO8P	NA	NA	NA	NA	NA	NA	NA	NA	NA	95.683	3.66254	37.0299
QC_ESTD10nM_LILY_rpMS1_posneg_2	PC	PC 40:0	ESTD	15.6	C48 H96 O8 N1 P1	NA	NA	NA	NA	NA	NA	NA	NA	NA	95.683	NA	9.10368
QC_ESTD10nM_LILY_rpMS1_posneg_2	TG	TG 48:3	ESTD	16.7	C51H92O6	NA	NA	NA	NA	NA	NA	NA	NA	NA	186.613	NA	13.3597
QC_ESTD10nM_LILY_rpMS1_posneg_2	TG	TG 54:9	ESTD	16.1	C57H92O6	NA	NA	NA	NA	NA	NA	NA	NA	NA	186.613	NA	14.3477
QC_ESTD10nM_LILY_rpMS1_posneg_3	Cer	Cer 34:1;2	ESTD	12.6	C34H67NO3	NA	NA	NA	NA	NA	NA	NA	3.73008	8.86103	NA	5.27689	8.96882
QC_ESTD10nM_LILY_rpMS1_posneg_3	Cer	Cer 42:0;2	ESTD	16.1	C42H85NO3	NA	NA	NA	NA	NA	NA	NA	NA	11.5679	NA	NA	14.9947
QC_ESTD10nM_LILY_rpMS1_posneg_3	Cer	Cer 42:1;2	ESTD	16	C42H83NO3	NA	NA	NA	NA	NA	NA	NA	5.34878	10.9472	NA	7.05206	14.0939
QC_ESTD10nM_LILY_rpMS1_posneg_3	Co	Co Q10	ESTD	16.8	C59H90O4	NA	NA	NA	NA	NA	NA	NA	NA	NA	NA	NA	11.6914
QC_ESTD10nM_LILY_rpMS1_posneg_3	DG	DG 32:0	ESTD	14.4	C35H68O5	NA	NA	NA	NA	NA	NA	NA	NA	NA	81.5706	-0.983759	32.9249
QC_ESTD10nM_LILY_rpMS1_posneg_3	DG	DG 34:0	Analyte	15.2	C37H72O5	NA	NA	NA	NA	NA	NA	NA	NA	NA	81.5706	NA	27.3884
QC_ESTD10nM_LILY_rpMS1_posneg_3	DG	DG 34:3	Analyte	12.6	H66C37O5	NA	NA	NA	NA	NA	NA	NA	NA	NA	81.5706	NA	16.8702
QC_ESTD10nM_LILY_rpMS1_posneg_3	DG	DG 36:0	Analyte	15.8	C39H76O5	NA	NA	NA	NA	NA	NA	NA	NA	NA	81.5706	NA	40.7171
QC_ESTD10nM_LILY_rpMS1_posneg_3	DG	DG 38:4	ESTD	14.4	C41H72O5	NA	NA	NA	NA	NA	NA	NA	NA	NA	81.5706	NA	22.0775
QC_ESTD10nM_LILY_rpMS1_posneg_3	DG	DG 40:6	ESTD	14.1	C43H72O5	NA	NA	NA	NA	NA	NA	NA	NA	NA	81.5706	NA	10.0067
QC_ESTD10nM_LILY_rpMS1_posneg_3	LPC	LPC 16:0	ESTD	2.8	C24H50NO7P	NA	NA	NA	NA	NA	NA	NA	NA	NA	65.7659	-0.229256	10.4878
QC_ESTD10nM_LILY_rpMS1_posneg_3	LPC	LPC 18:0	ESTD	3.6	C26H54NO7P	NA	NA	NA	NA	NA	NA	NA	NA	NA	65.7659	1.6445	11.6608
QC_ESTD10nM_LILY_rpMS1_posneg_3	LPC	LPC 18:1	DeutISTD	2.8	C26H52NO7P	NA	NA	NA	NA	NA	NA	NA	NA	NA	65.7659	-1.00776	3.04198
QC_ESTD10nM_LILY_rpMS1_posneg_3	PC	PC 33:1	DeutISTD	11.2	C41H80NO8P	NA	NA	NA	NA	NA	NA	NA	NA	NA	95.683	6.2087	6.58175
QC_ESTD10nM_LILY_rpMS1_posneg_3	PC	PC 34:0	ESTD	13.1	C42 H84 O8 N1 P1	NA	NA	NA	NA	NA	NA	NA	NA	NA	95.683	3.47542	7.08839
QC_ESTD10nM_LILY_rpMS1_posneg_3	PC	PC 36:0	ESTD	14.1	H88C44NO8P	NA	NA	NA	NA	NA	NA	NA	NA	NA	95.683	-0.0953893	9.78297
QC_ESTD10nM_LILY_rpMS1_posneg_3	PC	PC 36:1	ESTD	13.2	H86C44NO8P	NA	NA	NA	NA	NA	NA	NA	NA	NA	95.683	2.93474	11.9386
QC_ESTD10nM_LILY_rpMS1_posneg_3	PC	PC 36:2	ESTD	12.4	C44H84NO8P	NA	NA	NA	NA	NA	NA	NA	NA	NA	95.683	3.66254	36.492
QC_ESTD10nM_LILY_rpMS1_posneg_3	PC	PC 40:0	ESTD	15.6	C48 H96 O8 N1 P1	NA	NA	NA	NA	NA	NA	NA	NA	NA	95.683	NA	10.3181
QC_ESTD10nM_LILY_rpMS1_posneg_3	PC	PC P-36:3	Analyte	11.6	C44H82NO7P	NA	NA	NA	NA	NA	NA	NA	NA	NA	95.683	-0.135175	7.78425
QC_ESTD10nM_LILY_rpMS1_posneg_3	TG	TG 48:3	ESTD	16.7	C51H92O6	NA	NA	NA	NA	NA	NA	NA	NA	NA	186.613	NA	11.2071
QC_ESTD10nM_LILY_rpMS1_posneg_3	TG	TG 54:9	ESTD	16.1	C57H92O6	NA	NA	NA	NA	NA	NA	NA	NA	NA	186.613	NA	14.5667
QC_ESTD10nM_LILY_rpMS1_posneg_3	TG	TG 60:9	Analyte	17	C63 H104 O6	NA	NA	NA	NA	NA	NA	NA	NA	NA	186.613	NA	10.4703
QC_ESTD10nM_LILY_rpMS1_posneg_4	Cer	Cer 34:1;2	ESTD	12.6	C34H67NO3	NA	NA	NA	NA	NA	NA	NA	3.73008	10.0688	NA	5.27689	11.5319
QC_ESTD10nM_LILY_rpMS1_posneg_4	Cer	Cer 36:1;2	ESTD	13.7	C36H71NO3	NA	NA	NA	NA	NA	NA	NA	1.19393	12.2008	NA	NA	9.31718
QC_ESTD10nM_LILY_rpMS1_posneg_4	Cer	Cer 42:0;2	ESTD	16.1	C42H85NO3	NA	NA	NA	NA	NA	NA	NA	NA	18.8702	NA	NA	17.5481
QC_ESTD10nM_LILY_rpMS1_posneg_4	Cer	Cer 42:1;2	ESTD	16	C42H83NO3	NA	NA	NA	NA	NA	NA	NA	5.34878	17.1283	NA	7.05206	17.2236
QC_ESTD10nM_LILY_rpMS1_posneg_4	Co	Co Q10	ESTD	16.8	C59H90O4	NA	NA	NA	NA	NA	NA	NA	NA	NA	NA	NA	12.0456
QC_ESTD10nM_LILY_rpMS1_posneg_4	DG	DG 32:0	ESTD	14.4	C35H68O5	NA	NA	NA	NA	NA	NA	NA	NA	NA	81.5706	-0.983759	30.6255
QC_ESTD10nM_LILY_rpMS1_posneg_4	DG	DG 32:2	Analyte	12.5	H64C35O5	NA	NA	NA	NA	NA	NA	NA	NA	NA	81.5706	NA	10.585
QC_ESTD10nM_LILY_rpMS1_posneg_4	DG	DG 34:0	Analyte	15.2	C37H72O5	NA	NA	NA	NA	NA	NA	NA	NA	NA	81.5706	NA	31.8751
QC_ESTD10nM_LILY_rpMS1_posneg_4	DG	DG 34:3	Analyte	12.6	H66C37O5	NA	NA	NA	NA	NA	NA	NA	NA	NA	81.5706	NA	19.5926
QC_ESTD10nM_LILY_rpMS1_posneg_4	DG	DG 36:0	Analyte	15.8	C39H76O5	NA	NA	NA	NA	NA	NA	NA	NA	NA	81.5706	NA	30.8494
QC_ESTD10nM_LILY_rpMS1_posneg_4	DG	DG 38:4	ESTD	14.4	C41H72O5	NA	NA	NA	NA	NA	NA	NA	NA	NA	81.5706	NA	24.6916
QC_ESTD10nM_LILY_rpMS1_posneg_4	DG	DG 40:6	ESTD	14.1	C43H72O5	NA	NA	NA	NA	NA	NA	NA	NA	NA	81.5706	NA	11.6749
QC_ESTD10nM_LILY_rpMS1_posneg_4	LPC	LPC 16:0	ESTD	2.8	C24H50NO7P	NA	NA	NA	NA	NA	NA	NA	NA	NA	65.7659	-0.229256	14.1203
QC_ESTD10nM_LILY_rpMS1_posneg_4	LPC	LPC 18:0	ESTD	3.6	C26H54NO7P	NA	NA	NA	NA	NA	NA	NA	NA	NA	65.7659	1.6445	18.6283
QC_ESTD10nM_LILY_rpMS1_posneg_4	LPC	LPC 18:1	DeutISTD	2.8	C26H52NO7P	NA	NA	NA	NA	NA	NA	NA	NA	NA	65.7659	-1.00776	2.87728
QC_ESTD10nM_LILY_rpMS1_posneg_4	LPC	LPC 18:2	Analyte	2.4	H50C26NO7P	NA	NA	NA	NA	NA	NA	NA	NA	NA	65.7659	0.28858	2.90043
QC_ESTD10nM_LILY_rpMS1_posneg_4	PC	PC 33:1	DeutISTD	11.2	C41H80NO8P	NA	NA	NA	NA	NA	NA	NA	NA	NA	95.683	6.2087	6.25457
QC_ESTD10nM_LILY_rpMS1_posneg_4	PC	PC 34:0	ESTD	13.1	C42 H84 O8 N1 P1	NA	NA	NA	NA	NA	NA	NA	NA	NA	95.683	3.47542	8.23761
QC_ESTD10nM_LILY_rpMS1_posneg_4	PC	PC 36:0	ESTD	14.1	H88C44NO8P	NA	NA	NA	NA	NA	NA	NA	NA	NA	95.683	-0.0953893	12.96
QC_ESTD10nM_LILY_rpMS1_posneg_4	PC	PC 36:1	ESTD	13.2	H86C44NO8P	NA	NA	NA	NA	NA	NA	NA	NA	NA	95.683	2.93474	16.4001
QC_ESTD10nM_LILY_rpMS1_posneg_4	PC	PC 36:2	ESTD	12.4	C44H84NO8P	NA	NA	NA	NA	NA	NA	NA	NA	NA	95.683	3.66254	39.3164
QC_ESTD10nM_LILY_rpMS1_posneg_4	PC	PC 38:4	ESTD	12.1	H84C46NO8P	NA	NA	NA	NA	NA	NA	NA	NA	NA	95.683	0.634849	36.2504
QC_ESTD10nM_LILY_rpMS1_posneg_4	PC	PC 40:0	ESTD	15.6	C48 H96 O8 N1 P1	NA	NA	NA	NA	NA	NA	NA	NA	NA	95.683	NA	13.8238
QC_ESTD10nM_LILY_rpMS1_posneg_4	PC	PC 40:6	ESTD	11.7	C48H84NO8P	NA	0.494661	9.96813	NA	NA	NA	NA	NA	NA	95.683	-0.0662809	36.931
QC_ESTD10nM_LILY_rpMS1_posneg_4	PE	PE 34:1	ESTD	12.5	C39H76NO8P	60.2939	4.20324	4.22568	NA	NA	NA	NA	NA	NA	146.568	2.06938	6.68697
QC_ESTD10nM_LILY_rpMS1_posneg_4	PE	PE 36:2	ESTD	12.7	C41H78NO8P	NA	NA	NA	NA	NA	NA	NA	NA	NA	146.568	-1.78449	6.05521
QC_ESTD10nM_LILY_rpMS1_posneg_4	PE	PE P-38:4	Analyte	13.2	C43H78NO7P	60.2939	12.207	5.63977	NA	NA	NA	NA	NA	NA	146.568	4.19781	7.00215
QC_ESTD10nM_LILY_rpMS1_posneg_4	TG	TG 48:3	ESTD	16.7	C51H92O6	NA	NA	NA	NA	NA	NA	NA	NA	NA	186.613	NA	12.8612
QC_ESTD10nM_LILY_rpMS1_posneg_4	TG	TG 54:9	ESTD	16.1	C57H92O6	NA	NA	NA	NA	NA	NA	NA	NA	NA	186.613	NA	15.1128
plasma_Female01_LILY_rpMS1_posneg_1_Splash	SE	CE 16:0	ESTD	18.2	C43H76O2	NA	NA	NA	NA	NA	NA	NA	NA	NA	25.2481	3.55126	213.542
plasma_Female01_LILY_rpMS1_posneg_1_Splash	SE	CE 16:1	Analyte	17.8	C43 H74 O2	NA	NA	NA	NA	NA	NA	NA	NA	NA	25.2481	-3.48446	3.80787
plasma_Female01_LILY_rpMS1_posneg_1_Splash	SE	CE 17:0	Analyte	18.4	C44 H78 O2	NA	NA	NA	NA	NA	NA	NA	NA	NA	25.2481	NA	5.85428
plasma_Female01_LILY_rpMS1_posneg_1_Splash	SE	CE 18:0	ESTD	18.6	C45H80O2	NA	NA	NA	NA	NA	NA	NA	NA	NA	25.2481	17.3164	34.0434
plasma_Female01_LILY_rpMS1_posneg_1_Splash	SE	CE 18:1	Analyte	18.1	C45 H78 O2	NA	NA	NA	NA	NA	NA	NA	NA	NA	25.2481	-2.99293	75.8484
plasma_Female01_LILY_rpMS1_posneg_1_Splash	SE	CE 18:1	DeutISTD	18.1	C45H78O2	NA	NA	NA	NA	NA	NA	NA	NA	NA	25.2481	-2.99293	54.5506
plasma_Female01_LILY_rpMS1_posneg_1_Splash	SE	CE 18:2	ESTD	17.9	C45H76O2	NA	NA	NA	NA	NA	NA	NA	NA	NA	25.2481	-1.13607	1112.93
plasma_Female01_LILY_rpMS1_posneg_1_Splash	SE	CE 18:3	Analyte	17.6	C45 H74 O2	NA	NA	NA	NA	NA	NA	NA	NA	NA	25.2481	0.000105709	67.6021
plasma_Female01_LILY_rpMS1_posneg_1_Splash	SE	CE 20:3	Analyte	17.9	C47 H78 O2	NA	NA	NA	NA	NA	NA	NA	NA	NA	25.2481	-0.455039	16.9813
plasma_Female01_LILY_rpMS1_posneg_1_Splash	SE	CE 20:4	Analyte	17.7	C47 H76 O2	NA	NA	NA	NA	NA	NA	NA	NA	NA	25.2481	2.06418	407.437
plasma_Female01_LILY_rpMS1_posneg_1_Splash	SE	CE 20:5	Analyte	17.4	C47 H74 O2	NA	NA	NA	NA	NA	NA	NA	NA	NA	25.2481	3.84231	44.2167
plasma_Female01_LILY_rpMS1_posneg_1_Splash	SE	CE 22:5	Analyte	17.7	C49 H78 O2	NA	NA	NA	NA	NA	NA	NA	NA	NA	25.2481	2.22339	5.44096
plasma_Female01_LILY_rpMS1_posneg_1_Splash	SE	CE 22:6	Analyte	17.5	C49 H76 O2	NA	NA	NA	NA	NA	NA	NA	NA	NA	25.2481	2.82711	54.7569
plasma_Female01_LILY_rpMS1_posneg_1_Splash	Cer	Cer 34:1;2	ESTD	12.6	C34H67NO3	NA	NA	NA	NA	NA	NA	NA	3.73008	0.366026	NA	5.27689	0.397567
plasma_Female01_LILY_rpMS1_posneg_1_Splash	Cer	Cer 36:1;2	ESTD	13.7	C36H71NO3	NA	NA	NA	NA	NA	NA	NA	1.19393	0.21502	NA	NA	0.192305
plasma_Female01_LILY_rpMS1_posneg_1_Splash	Cer	Cer 40:1;2	Analyte	15.4	C40H79NO3	NA	NA	NA	NA	NA	NA	NA	4.11885	1.09101	NA	5.90022	1.26686
plasma_Female01_LILY_rpMS1_posneg_1_Splash	Cer	Cer 40:2;2	Analyte	14.8	C40H77NO3	NA	NA	NA	NA	NA	NA	NA	3.69146	0.234159	NA	4.45088	0.255032
plasma_Female01_LILY_rpMS1_posneg_1_Splash	Cer	Cer 41:1;2	Analyte	15.7	C41H81NO3	NA	NA	NA	NA	NA	NA	NA	1.48689	1.20264	NA	2.01472	1.19859
plasma_Female01_LILY_rpMS1_posneg_1_Splash	Cer	Cer 42:0;2	ESTD	16.1	C42H85NO3	NA	NA	NA	NA	NA	NA	NA	NA	0.177548	NA	NA	0.227075
plasma_Female01_LILY_rpMS1_posneg_1_Splash	Cer	Cer 42:1;2	ESTD	16	C42H83NO3	NA	NA	NA	NA	NA	NA	NA	5.34878	4.01099	NA	7.05206	4.32432
plasma_Female01_LILY_rpMS1_posneg_1_Splash	Cer	Cer 42:2;2	ESTD	15.4	C42H81NO3	NA	NA	NA	NA	NA	NA	NA	1.60065	1.00159	NA	0.292781	0.817403
plasma_Female01_LILY_rpMS1_posneg_1_Splash	Cer	Cer 42:3;2	Analyte	14.7	C42H79NO3	NA	NA	NA	NA	NA	NA	NA	NA	0.321251	NA	NA	0.30943
plasma_Female01_LILY_rpMS1_posneg_1_Splash	Co	Co Q10	ESTD	16.8	C59H90O4	NA	NA	NA	NA	NA	NA	NA	NA	NA	NA	NA	0.933426
plasma_Female01_LILY_rpMS1_posneg_1_Splash	DG	DG 32:0	ESTD	14.4	C35H68O5	NA	NA	NA	NA	NA	NA	NA	NA	NA	81.5706	-0.983759	0.776824
plasma_Female01_LILY_rpMS1_posneg_1_Splash	DG	DG 32:1	Analyte	13.5	C35H66O5	NA	NA	NA	NA	NA	NA	NA	NA	NA	81.5706	NA	0.491547
plasma_Female01_LILY_rpMS1_posneg_1_Splash	DG	DG 32:2	Analyte	12.5	H64C35O5	NA	NA	NA	NA	NA	NA	NA	NA	NA	81.5706	NA	0.254035
plasma_Female01_LILY_rpMS1_posneg_1_Splash	DG	DG 33:1	DeutISTD	13.9	C36H68O5	41.4932	NA	2.54871	NA	NA	NA	NA	NA	NA	81.5706	NA	4.57584
plasma_Female01_LILY_rpMS1_posneg_1_Splash	DG	DG 34:0	Analyte	15.2	C37H72O5	41.4932	NA	0.701061	NA	NA	NA	NA	NA	NA	81.5706	NA	1.0605
plasma_Female01_LILY_rpMS1_posneg_1_Splash	DG	DG 34:1	ESTD	14.4	C37H70O5	41.4932	-1.03827	0.970134	NA	NA	NA	NA	NA	NA	81.5706	-0.431748	1.40577
plasma_Female01_LILY_rpMS1_posneg_1_Splash	DG	DG 34:2	Analyte	13.7	H68C37O5	41.4932	NA	0.781757	NA	NA	NA	NA	NA	NA	81.5706	NA	1.18125
plasma_Female01_LILY_rpMS1_posneg_1_Splash	DG	DG 34:3	Analyte	12.6	H66C37O5	41.4932	NA	0.274275	NA	NA	NA	NA	NA	NA	81.5706	NA	0.64041
plasma_Female01_LILY_rpMS1_posneg_1_Splash	DG	DG 36:0	Analyte	15.8	C39H76O5	41.4932	NA	0.811677	NA	NA	NA	NA	NA	NA	81.5706	NA	1.33062
plasma_Female01_LILY_rpMS1_posneg_1_Splash	DG	DG 36:1	Analyte	15.2	H74C39O5	NA	NA	NA	NA	NA	NA	NA	NA	NA	81.5706	NA	0.402469
plasma_Female01_LILY_rpMS1_posneg_1_Splash	DG	DG 36:2	ESTD	14.5	C39H72O5	41.4932	-1.52589	0.993889	NA	NA	NA	NA	NA	NA	81.5706	-0.511262	1.92741
plasma_Female01_LILY_rpMS1_posneg_1_Splash	DG	DG 36:3	Analyte	13.7	H70C39O5	41.4932	-1.61365	1.71876	NA	NA	NA	NA	NA	NA	81.5706	-0.958183	3.01874
plasma_Female01_LILY_rpMS1_posneg_1_Splash	DG	DG 36:4	Analyte	12.8	H68C39O5	41.4932	-1.54125	0.943962	NA	NA	NA	NA	NA	NA	81.5706	-0.93735	1.44554
plasma_Female01_LILY_rpMS1_posneg_1_Splash	DG	DG 36:5	Analyte	11.9	H66C39O5	NA	NA	NA	NA	NA	NA	NA	NA	NA	81.5706	NA	0.132612
plasma_Female01_LILY_rpMS1_posneg_1_Splash	DG	DG 38:3	Analyte	14.6	C41 H74 O5	NA	NA	NA	NA	NA	NA	NA	NA	NA	81.5706	NA	0.340096
plasma_Female01_LILY_rpMS1_posneg_1_Splash	DG	DG 38:4	ESTD	14.4	C41H72O5	NA	NA	NA	NA	NA	NA	NA	NA	NA	81.5706	NA	0.338989
plasma_Female01_LILY_rpMS1_posneg_1_Splash	DG	DG 38:5	Analyte	13.5	C41H70O5	41.4932	NA	0.266454	NA	NA	NA	NA	NA	NA	81.5706	NA	0.521751
plasma_Female01_LILY_rpMS1_posneg_1_Splash	DG	DG 38:6	Analyte	12.5	C41 H68 O5	NA	NA	NA	NA	NA	NA	NA	NA	NA	81.5706	NA	0.513368
plasma_Female01_LILY_rpMS1_posneg_1_Splash	SE	EE 18:0	Analyte	18	H78 C46 O2	NA	NA	NA	NA	NA	NA	NA	NA	NA	25.2481	NA	86.8361
plasma_Female01_LILY_rpMS1_posneg_1_Splash	HexCer	HexCer 42:1;2	Analyte	15.3	C48H93NO8	NA	NA	NA	NA	NA	NA	NA	NA	NA	NA	-1.97527	0.810621
plasma_Female01_LILY_rpMS1_posneg_1_Splash	LPC	LPC 14:0	Analyte	2.2	C22H46NO7P	NA	NA	NA	NA	NA	NA	NA	NA	NA	65.7659	1.93593	0.885062
plasma_Female01_LILY_rpMS1_posneg_1_Splash	LPC	LPC 15:0	Analyte	2.5	C23H48NO7P	286.248	12.4351	1.70746	NA	NA	NA	NA	NA	NA	65.7659	1.82031	0.664707
plasma_Female01_LILY_rpMS1_posneg_1_Splash	LPC	LPC 16:0	ESTD	2.8	C24H50NO7P	286.248	25.2734	233.808	NA	NA	NA	64.7639	-0.0675593	46.7012	65.7659	-0.229256	46.5494
plasma_Female01_LILY_rpMS1_posneg_1_Splash	LPC	LPC 17:0	Analyte	3.2	C25H52NO7P	286.248	15.7275	4.07095	NA	NA	NA	64.7639	1.27111	1.37127	65.7659	0.914974	1.30717
plasma_Female01_LILY_rpMS1_posneg_1_Splash	LPC	LPC 18:0	ESTD	3.6	C26H54NO7P	286.248	29.2932	80.4338	NA	NA	NA	64.7639	-1.52189	14.9634	65.7659	1.6445	18.9227
plasma_Female01_LILY_rpMS1_posneg_1_Splash	LPC	LPC 18:1	Analyte	2.9	H52C26NO7P	286.248	30.7626	50.8888	NA	NA	NA	64.7639	-1.07539	10.1028	65.7659	-1.00776	10.2002
plasma_Female01_LILY_rpMS1_posneg_1_Splash	LPC	LPC 18:1	DeutISTD	2.8	C26H52NO7P	NA	NA	NA	NA	NA	NA	NA	NA	NA	65.7659	-1.00776	12.4863
plasma_Female01_LILY_rpMS1_posneg_1_Splash	LPC	LPC 18:2	Analyte	2.4	H50C26NO7P	286.248	7.11383	46.2136	NA	NA	NA	64.7639	-0.470433	21.9759	65.7659	0.28858	24.6102
plasma_Female01_LILY_rpMS1_posneg_1_Splash	LPC	LPC 18:3	Analyte	2.1	H48C26NO7P	NA	NA	NA	NA	NA	NA	64.7639	7.08648	1.3099	65.7659	6.10183	1.05183
plasma_Female01_LILY_rpMS1_posneg_1_Splash	LPC	LPC 20:1	Analyte	3.7	C28H56NO7P	NA	NA	NA	NA	NA	NA	NA	NA	NA	65.7659	8.34886	0.125792
plasma_Female01_LILY_rpMS1_posneg_1_Splash	LPC	LPC 20:2	Analyte	3	C28H54NO7P	NA	NA	NA	NA	NA	NA	NA	NA	NA	65.7659	4.47786	0.260896
plasma_Female01_LILY_rpMS1_posneg_1_Splash	LPC	LPC 20:3	Analyte	2.6	C28H52NO7P	286.248	4.71092	2.05966	NA	NA	NA	64.7639	6.57304	2.82151	65.7659	6.8692	2.61874
plasma_Female01_LILY_rpMS1_posneg_1_Splash	LPC	LPC 20:4	Analyte	2.3	C28H50NO7P	286.248	7.23678	8.78636	NA	NA	NA	64.7639	4.19949	7.95161	65.7659	5.87883	8.36156
plasma_Female01_LILY_rpMS1_posneg_1_Splash	LPC	LPC 20:5	Analyte	2.1	C28H48NO7P	NA	NA	NA	NA	NA	NA	64.7639	7.78617	0.991334	65.7659	7.5422	0.749035
plasma_Female01_LILY_rpMS1_posneg_1_Splash	LPC	LPC 22:4	Analyte	2.7	C30H54NO7P	NA	NA	NA	NA	NA	NA	NA	NA	NA	65.7659	5.30789	0.194261
plasma_Female01_LILY_rpMS1_posneg_1_Splash	LPC	LPC 22:5	Analyte	2.4	C30H52NO7P	NA	NA	NA	NA	NA	NA	64.7639	6.37783	0.896052	65.7659	5.74101	0.630686
plasma_Female01_LILY_rpMS1_posneg_1_Splash	LPC	LPC 22:6	Analyte	2.2	C30H50NO7P	NA	NA	NA	NA	NA	NA	64.7639	8.63267	1.7724	65.7659	9.47532	1.71667
plasma_Female01_LILY_rpMS1_posneg_1_Splash	LPC	LPC O-16:0	Analyte	3.2	C24 H52 O6 N1 P1	286.248	12.0513	1.95027	NA	NA	NA	NA	NA	NA	65.7659	2.3228	0.728147
plasma_Female01_LILY_rpMS1_posneg_1_Splash	LPC	LPC O-16:1	Analyte	3.1	C24 H50 O6 N1 P1	286.248	NA	1.98348	NA	NA	NA	NA	NA	NA	65.7659	NA	0.736826
plasma_Female01_LILY_rpMS1_posneg_1_Splash	LPC	LPC O-18:1	Analyte	4.1	C26 H54 O6 N1 P1	NA	NA	NA	NA	NA	NA	NA	NA	NA	65.7659	-0.90848	0.232361
plasma_Female01_LILY_rpMS1_posneg_1_Splash	LPE	LPE 16:0	Analyte	2.9	H44C21NO7P	NA	NA	NA	NA	NA	NA	107.506	2.49567	1.13285	100.734	2.71099	1.07166
plasma_Female01_LILY_rpMS1_posneg_1_Splash	LPE	LPE 18:0	ESTD	3.8	H48C23NO7P	NA	NA	NA	NA	NA	NA	107.506	0.708065	1.18872	100.734	0.827119	1.16548
plasma_Female01_LILY_rpMS1_posneg_1_Splash	LPE	LPE 18:1	DeutISTD	3	C23H46NO7P	NA	NA	NA	NA	NA	NA	107.506	1.36616	4.47353	100.734	NA	4.15509
plasma_Female01_LILY_rpMS1_posneg_1_Splash	LPE	LPE 18:2	Analyte	2.5	H44C23NO7P	NA	NA	NA	NA	NA	NA	107.506	2.9838	3.27645	100.734	3.83293	3.6157
plasma_Female01_LILY_rpMS1_posneg_1_Splash	LPE	LPE 20:4	Analyte	2.4	C25H44NO7P	NA	NA	NA	NA	NA	NA	107.506	4.33676	2.6786	100.734	NA	3.01233
plasma_Female01_LILY_rpMS1_posneg_1_Splash	LPE	LPE 22:6	Analyte	2.3	C27H44NO7P	NA	NA	NA	NA	NA	NA	107.506	4.95051	1.05181	100.734	6.28443	1.28979
plasma_Female01_LILY_rpMS1_posneg_1_Splash	PC	PC 30:0	Analyte	10.1	C38H76NO8P	NA	0.0074994	0.690694	NA	NA	NA	84.9997	-0.226819	0.815054	95.683	0.461465	0.883076
plasma_Female01_LILY_rpMS1_posneg_1_Splash	PC	PC 31:0	Analyte	11.1	C39H78NO8P	NA	13.7766	1.18468	NA	NA	NA	NA	NA	NA	95.683	5.86468	0.802274
plasma_Female01_LILY_rpMS1_posneg_1_Splash	PC	PC 32:0	ESTD	11.9	C40H80NO8P	NA	4.84221	4.43102	NA	NA	NA	NA	NA	NA	95.683	-1.31431	4.25483
plasma_Female01_LILY_rpMS1_posneg_1_Splash	PC	PC 32:1	Analyte	10.3	H78C40NO8P	NA	-0.0199914	5.12195	NA	NA	NA	84.9997	-1.41756	5.00159	95.683	0.174428	5.29745
plasma_Female01_LILY_rpMS1_posneg_1_Splash	PC	PC 32:2	Analyte	8.7	H76C40NO8P	NA	0.607864	1.8013	NA	NA	NA	84.9997	-1.98542	1.24662	95.683	-0.658421	1.62738
plasma_Female01_LILY_rpMS1_posneg_1_Splash	PC	PC 33:0	Analyte	12.3	C41 H82 O8 N1 P1	NA	NA	NA	NA	NA	NA	NA	NA	NA	95.683	-0.651722	0.332893
plasma_Female01_LILY_rpMS1_posneg_1_Splash	PC	PC 33:1	Analyte	11.2	H80C41NO8P	NA	18.7663	6.08413	NA	NA	NA	84.9997	3.32484	2.58247	95.683	6.2087	3.17101
plasma_Female01_LILY_rpMS1_posneg_1_Splash	PC	PC 33:2	Analyte	9.7	H78C41NO8P	NA	9.14238	19.8311	NA	NA	NA	84.9997	-0.202048	4.00033	95.683	0.78157	5.09152
plasma_Female01_LILY_rpMS1_posneg_1_Splash	PC	PC 34:0	ESTD	13.1	C42 H84 O8 N1 P1	NA	12.1794	4.68195	NA	NA	NA	84.9997	2.73633	2.93424	95.683	3.47542	2.52285
plasma_Female01_LILY_rpMS1_posneg_1_Splash	PC	PC 34:1	ESTD	12	C42H82NO8P	NA	-1.40658	58.582	NA	NA	NA	NA	NA	NA	95.683	-1.78146	53.5615
plasma_Female01_LILY_rpMS1_posneg_1_Splash	PC	PC 34:2	ESTD	10.7	C42H80NO8P	NA	-0.55428	192.667	NA	NA	NA	84.9997	0.730053	249.121	95.683	0.648908	243.596
plasma_Female01_LILY_rpMS1_posneg_1_Splash	PC	PC 34:3	Analyte	9.2	H78C42NO8P	NA	-3.22977	5.06677	NA	NA	NA	84.9997	-2.49798	5.95285	95.683	-2.01714	6.8047
plasma_Female01_LILY_rpMS1_posneg_1_Splash	PC	PC 34:4	Analyte	8.4	H76C42NO8P	NA	0.0455125	0.71356	NA	NA	NA	84.9997	0.932281	0.884529	95.683	3.79822	1.48517
plasma_Female01_LILY_rpMS1_posneg_1_Splash	PC	PC 34:5	Analyte	7.1	H74C42NO8P	NA	NA	NA	NA	NA	NA	NA	NA	NA	95.683	85.6806	0.39708
plasma_Female01_LILY_rpMS1_posneg_1_Splash	PC	PC 35:0	Analyte	13.6	C43 H86 O8 N1 P1	NA	NA	NA	NA	NA	NA	NA	NA	NA	95.683	NA	0.132752
plasma_Female01_LILY_rpMS1_posneg_1_Splash	PC	PC 35:1	Analyte	12.5	H84C43NO8P	NA	-3.07828	0.311557	NA	NA	NA	NA	NA	NA	95.683	-2.92816	0.458767
plasma_Female01_LILY_rpMS1_posneg_1_Splash	PC	PC 35:2	Analyte	11.4	H82C43NO8P	NA	-1.42987	4.39145	NA	NA	NA	84.9997	-0.919959	4.09132	95.683	-2.52083	2.80638
plasma_Female01_LILY_rpMS1_posneg_1_Splash	PC	PC 35:3	Analyte	9.9	H80C43NO8P	NA	0.292387	0.5397	NA	NA	NA	NA	NA	NA	95.683	1.43221	1.22953
plasma_Female01_LILY_rpMS1_posneg_1_Splash	PC	PC 35:4	Analyte	9.4	H78C43NO8P	NA	5.73919	1.69166	NA	NA	NA	84.9997	1.05188	1.24193	95.683	-0.135175	1.65584
plasma_Female01_LILY_rpMS1_posneg_1_Splash	PC	PC 35:5	Analyte	8	H76C43NO8P	NA	NA	NA	NA	NA	NA	NA	NA	NA	95.683	-4.06069	0.410345
plasma_Female01_LILY_rpMS1_posneg_1_Splash	PC	PC 36:0	ESTD	14.1	H88C44NO8P	NA	NA	NA	NA	NA	NA	84.9997	-0.0242568	0.379383	95.683	-0.0953893	0.37822
plasma_Female01_LILY_rpMS1_posneg_1_Splash	PC	PC 36:1	ESTD	13.2	H86C44NO8P	NA	14.5145	64.5749	NA	NA	NA	84.9997	2.64183	30.9596	95.683	2.93474	27.5836
plasma_Female01_LILY_rpMS1_posneg_1_Splash	PC	PC 36:2	ESTD	12.4	C44H84NO8P	NA	3.24856	206.185	NA	NA	NA	84.9997	1.05921	154.023	95.683	3.66254	215.291
plasma_Female01_LILY_rpMS1_posneg_1_Splash	PC	PC 36:3	Analyte	11.1	H82C44NO8P	NA	-0.982896	60.911	NA	NA	NA	NA	NA	NA	95.683	0.371101	74.3146
plasma_Female01_LILY_rpMS1_posneg_1_Splash	PC	PC 36:5	Analyte	9	H78C44NO8P	NA	-1.21003	7.24613	NA	NA	NA	84.9997	0.024299	9.0599	95.683	1.55178	11.5605
plasma_Female01_LILY_rpMS1_posneg_1_Splash	PC	PC 37:1	Analyte	13.7	C45 H88 O8 N1 P1	NA	NA	NA	NA	NA	NA	NA	NA	NA	95.683	NA	0.395863
plasma_Female01_LILY_rpMS1_posneg_1_Splash	PC	PC 37:3	Analyte	11.9	H84C45NO8P	NA	NA	NA	NA	NA	NA	NA	NA	NA	95.683	2.31404	1.28336
plasma_Female01_LILY_rpMS1_posneg_1_Splash	PC	PC 37:4	Analyte	11.3	H82C45NO8P	NA	4.95631	2.61658	NA	NA	NA	NA	NA	NA	95.683	-2.19729	3.24106
plasma_Female01_LILY_rpMS1_posneg_1_Splash	PC	PC 37:6	Analyte	8.8	C45H78NO8P	NA	4.26435	0.436877	NA	NA	NA	NA	NA	NA	95.683	1.52533	0.677546
plasma_Female01_LILY_rpMS1_posneg_1_Splash	PC	PC 38:0	Analyte	14.9	C46 H92 O8 N1 P1	NA	NA	NA	NA	NA	NA	NA	NA	NA	95.683	NA	0.117202
plasma_Female01_LILY_rpMS1_posneg_1_Splash	PC	PC 38:1	Analyte	14.1	C46 H90 O8 N1 P1	NA	NA	NA	NA	NA	NA	84.9997	NA	0.777232	95.683	NA	0.7499
plasma_Female01_LILY_rpMS1_posneg_1_Splash	PC	PC 38:2	Analyte	13.3	C46 H88 O8 N1 P1	NA	43.0334	7.10315	NA	NA	NA	84.9997	10.8615	3.86703	95.683	30.3611	4.43526
plasma_Female01_LILY_rpMS1_posneg_1_Splash	PC	PC 38:3	Analyte	12.6	H86C46NO8P	NA	1.24375	26.8327	NA	NA	NA	84.9997	-0.454349	18.7515	95.683	1.74967	30.0143
plasma_Female01_LILY_rpMS1_posneg_1_Splash	PC	PC 38:4	ESTD	12.1	H84C46NO8P	NA	0.652788	95.0212	NA	NA	NA	84.9997	-1.08889	69.0167	95.683	0.634849	94.9258
plasma_Female01_LILY_rpMS1_posneg_1_Splash	PC	PC 38:5	Analyte	10.5	H82C46NO8P	NA	-1.78893	20.373	NA	NA	NA	NA	NA	NA	95.683	-1.0092	24.89
plasma_Female01_LILY_rpMS1_posneg_1_Splash	PC	PC 38:6	ESTD	9.8	C46H80NO8P	NA	-2.71622	25.9046	NA	NA	NA	84.9997	3.19735	49.8643	95.683	3.80588	51.6403
plasma_Female01_LILY_rpMS1_posneg_1_Splash	PC	PC 40:0	ESTD	15.6	C48 H96 O8 N1 P1	NA	NA	NA	NA	NA	NA	NA	NA	NA	95.683	NA	0.110986
plasma_Female01_LILY_rpMS1_posneg_1_Splash	PC	PC 40:5	Analyte	12.1	C48H86NO8P	NA	2.26795	6.82968	NA	NA	NA	84.9997	1.28938	6.33066	95.683	2.09902	6.8839
plasma_Female01_LILY_rpMS1_posneg_1_Splash	PC	PC 40:6	ESTD	11.7	C48H84NO8P	NA	0.494661	14.6078	NA	NA	NA	84.9997	-0.933534	11.6043	95.683	-0.0662809	13.291
plasma_Female01_LILY_rpMS1_posneg_1_Splash	PC	PC 40:7	Analyte	10	C48H82NO8P	NA	0.615679	2.50145	NA	NA	NA	84.9997	2.30778	3.68264	95.683	3.6026	4.26008
plasma_Female01_LILY_rpMS1_posneg_1_Splash	PC	PC 40:8	Analyte	8.5	C48H80NO8P	NA	3.41764	1.2683	NA	NA	NA	84.9997	1.02078	0.905673	95.683	3.57037	1.3335
plasma_Female01_LILY_rpMS1_posneg_1_Splash	PC	PC O-32:0	Analyte	12.8	C40 H82 O7 N1 P1	NA	13.7766	3.97555	NA	NA	NA	84.9997	2.1253	1.95093	95.683	5.86468	2.16438
plasma_Female01_LILY_rpMS1_posneg_1_Splash	PC	PC O-34:0	Analyte	13.8	C42 H86 O7 N1 P1	NA	NA	NA	NA	NA	NA	NA	NA	NA	95.683	-0.651722	0.243507
plasma_Female01_LILY_rpMS1_posneg_1_Splash	PC	PC P-32:0	Analyte	12.6	C40H80NO7P	NA	NA	NA	NA	NA	NA	84.9997	1.51089	1.9179	95.683	1.59869	1.95211
plasma_Female01_LILY_rpMS1_posneg_1_Splash	PC	PC P-32:1	Analyte	11.4	C40H78NO7P	NA	13.2796	1.14113	NA	NA	NA	NA	NA	NA	95.683	7.00308	0.781185
plasma_Female01_LILY_rpMS1_posneg_1_Splash	PC	PC P-34:0	Analyte	12.8	C42 H84 O7 N1 P1	NA	18.7663	8.98678	NA	NA	NA	84.9997	3.32484	4.16716	95.683	6.2087	4.45345
plasma_Female01_LILY_rpMS1_posneg_1_Splash	PC	PC P-34:1	Analyte	11.8	C42H82NO7P	NA	9.14238	2.77419	NA	NA	NA	NA	NA	NA	95.683	0.78157	2.71212
plasma_Female01_LILY_rpMS1_posneg_1_Splash	PC	PC P-34:2	Analyte	11.6	C42H80NO7P	NA	-1.44488	3.37328	NA	NA	NA	NA	NA	NA	95.683	-1.76715	3.29172
plasma_Female01_LILY_rpMS1_posneg_1_Splash	PC	PC P-36:2	Analyte	11.9	C44H84NO7P	NA	0.292387	3.69132	NA	NA	NA	84.9997	-0.568331	3.26019	95.683	1.43221	4.00639
plasma_Female01_LILY_rpMS1_posneg_1_Splash	PC	PC P-36:3	Analyte	11.6	C44H82NO7P	NA	5.73919	19.8662	NA	NA	NA	84.9997	1.05188	17.0592	95.683	-0.135175	11.1334
plasma_Female01_LILY_rpMS1_posneg_1_Splash	PC	PC P-38:2	Analyte	13.4	C46 H88 O7 N1 P1	NA	0.620024	1.20396	NA	NA	NA	84.9997	-0.96087	0.849496	95.683	2.31404	0.892982
plasma_Female01_LILY_rpMS1_posneg_1_Splash	PC	PC P-38:4	Analyte	11.7	C46H84NO7P	NA	0.164233	9.34182	NA	NA	NA	84.9997	-1.52541	6.84216	95.683	-0.221941	9.12527
plasma_Female01_LILY_rpMS1_posneg_1_Splash	PC	PC P-38:5	Analyte	11.4	C46H82NO7P	NA	4.26435	6.88851	NA	NA	NA	NA	NA	NA	95.683	1.52533	4.187
plasma_Female01_LILY_rpMS1_posneg_1_Splash	PC	PC P-38:6	Analyte	10.8	C46 H80 O7 N1 P1	NA	-1.26442	0.507676	NA	NA	NA	84.9997	-0.0242568	0.84703	95.683	-0.0953893	0.793467
plasma_Female01_LILY_rpMS1_posneg_1_Splash	PC	PC P-40:5	Analyte	11.8	C48H86NO7P	NA	NA	NA	NA	NA	NA	NA	NA	NA	95.683	NA	1.29054
plasma_Female01_LILY_rpMS1_posneg_1_Splash	PC	PC P-40:6	Analyte	11.2	C48H84NO7P	NA	-0.129327	0.921481	NA	NA	NA	84.9997	-1.06249	0.767029	95.683	-1.17396	0.742432
plasma_Female01_LILY_rpMS1_posneg_1_Splash	PC	PC P-40:7	Analyte	10.9	C48 H82 O7 N1 P1	NA	NA	0.250969	NA	NA	NA	84.9997	NA	0.327416	95.683	NA	0.350345
plasma_Female01_LILY_rpMS1_posneg_1_Splash	PC	PC P-42:2	Analyte	14.9	C50 H96 O7 N1 P1	NA	NA	NA	NA	NA	NA	NA	NA	NA	95.683	NA	0.408232
plasma_Female01_LILY_rpMS1_posneg_1_Splash	PE	PE 33:1	DeutISTD	11.7	C38H74NO8P	60.2939	NA	1.87942	201.817	NA	6.24097	116.707	NA	3.76483	146.568	NA	3.92831
plasma_Female01_LILY_rpMS1_posneg_1_Splash	PE	PE 34:1	ESTD	12.5	C39H76NO8P	60.2939	4.20324	1.25222	201.817	9.11455	1.98602	116.707	2.72247	1.22761	146.568	2.06938	1.09329
plasma_Female01_LILY_rpMS1_posneg_1_Splash	PE	PE 34:2	Analyte	11.3	H74C39NO8P	60.2939	1.20957	2.10387	201.817	9.41708	4.14082	116.707	-1.16404	1.73773	146.568	-0.827086	1.7419
plasma_Female01_LILY_rpMS1_posneg_1_Splash	PE	PE 36:1	Analyte	13.6	H80C41NO8P	60.2939	4.19757	2.76672	201.817	1.2121	1.83915	116.707	1.0442	1.75091	146.568	0.602027	1.6524
plasma_Female01_LILY_rpMS1_posneg_1_Splash	PE	PE 36:2	ESTD	12.7	C41H78NO8P	60.2939	0.921812	7.4654	NA	NA	NA	NA	NA	NA	146.568	-1.78449	5.32095
plasma_Female01_LILY_rpMS1_posneg_1_Splash	PE	PE 36:3	Analyte	11.5	H76C41NO8P	60.2939	-2.53369	1.74088	201.817	-2.08803	2.2462	116.707	-3.77346	1.22393	146.568	-2.13159	1.9294
plasma_Female01_LILY_rpMS1_posneg_1_Splash	PE	PE 36:4	Analyte	10	H74C41NO8P	60.2939	-7.37409	0.381037	201.817	-7.05243	0.74521	116.707	-7.37188	0.400028	146.568	-6.96316	0.608265
plasma_Female01_LILY_rpMS1_posneg_1_Splash	PE	PE 38:4	Analyte	12.5	C43H78NO8P	60.2939	1.47646	9.19505	201.817	8.34553	17.4056	116.707	-1.66129	5.87716	146.568	-0.66002	6.74919
plasma_Female01_LILY_rpMS1_posneg_1_Splash	PE	PE 38:5	Analyte	11.2	C43 H76 O8 N1 P1	60.2939	-3.23969	0.442092	201.817	5.47951	3.23459	116.707	-0.407114	1.64706	146.568	-2.95577	0.43677
plasma_Female01_LILY_rpMS1_posneg_1_Splash	PE	PE 38:6	Analyte	10.5	C43H74NO8P	60.2939	-1.38928	1.64256	201.817	3.19762	3.57634	116.707	-2.44232	1.36629	146.568	-1.46111	1.78059
plasma_Female01_LILY_rpMS1_posneg_1_Splash	PE	PE 40:6	Analyte	12.1	C45H78NO8P	60.2939	0.985974	1.44758	201.817	4.94146	2.53679	116.707	-0.9254	1.08865	146.568	-0.620412	1.12161
plasma_Female01_LILY_rpMS1_posneg_1_Splash	PE	PE P-34:1	Analyte	13.2	C39 H76 O7 N1 P1	60.2939	4.61522	2.47452	201.817	1.42058	1.37223	116.707	1.85883	1.37692	146.568	1.42653	1.49992
plasma_Female01_LILY_rpMS1_posneg_1_Splash	PE	PE P-36:1	Analyte	14.1	C41H80NO7P	60.2939	1.67915	1.44966	201.817	0.414734	1.04289	116.707	0.753614	1.11313	146.568	-0.208772	0.965109
plasma_Female01_LILY_rpMS1_posneg_1_Splash	PE	PE P-36:2	Analyte	13.4	C41H78NO7P	60.2939	6.54063	7.33848	201.817	3.08047	4.92468	116.707	1.9429	4.19676	146.568	1.26077	3.77975
plasma_Female01_LILY_rpMS1_posneg_1_Splash	PE	PE P-36:3	Analyte	12.2	C41 H76 O7 N1 P1	60.2939	2.21729	3.80608	201.817	8.58735	6.66686	116.707	0.0297389	2.40624	146.568	0.0560675	2.50796
plasma_Female01_LILY_rpMS1_posneg_1_Splash	PE	PE P-36:4	Analyte	11.9	C41H74NO7P	60.2939	-1.57913	4.46191	201.817	5.21971	36.3338	116.707	0.0741825	12.1118	146.568	-1.46982	5.55219
plasma_Female01_LILY_rpMS1_posneg_1_Splash	PE	PE P-36:5	Analyte	10.8	C41 H72 O7 N1 P1	60.2939	NA	0.330696	NA	NA	NA	NA	NA	NA	146.568	NA	0.557262
plasma_Female01_LILY_rpMS1_posneg_1_Splash	PE	PE P-38:3	Analyte	13.3	C43 H80 O7 N1 P1	60.2939	5.15569	2.21649	NA	NA	NA	NA	NA	NA	146.568	1.35237	1.36527
plasma_Female01_LILY_rpMS1_posneg_1_Splash	PE	PE P-38:4	Analyte	13.2	C43H78NO7P	60.2939	12.207	45.0309	201.817	4.82511	23.4204	116.707	3.27051	18.5933	146.568	4.19781	21.1661
plasma_Female01_LILY_rpMS1_posneg_1_Splash	PE	PE P-38:5	Analyte	12	C43H76NO7P	60.2939	3.25791	14.4139	201.817	9.35699	27.3219	116.707	2.12973	12.3185	146.568	0.862217	9.60225
plasma_Female01_LILY_rpMS1_posneg_1_Splash	PE	PE P-38:6	Analyte	11.4	C43 H74 O7 N1 P1	60.2939	-0.478919	4.09268	201.817	0.508764	5.37137	116.707	-1.53413	2.45117	146.568	0.0936123	4.78781
plasma_Female01_LILY_rpMS1_posneg_1_Splash	PE	PE P-40:4	Analyte	14.2	C45 H82 O7 N1 P1	60.2939	-2.64976	0.554465	201.817	-0.600943	2.08413	116.707	-0.634704	0.876354	146.568	-0.0728426	0.880052
plasma_Female01_LILY_rpMS1_posneg_1_Splash	PE	PE P-40:5	Analyte	13.2	C45H80NO7P	60.2939	3.19237	3.30663	201.817	-0.464288	1.75459	116.707	-0.31036	1.68318	146.568	0.333671	1.93415
plasma_Female01_LILY_rpMS1_posneg_1_Splash	PE	PE P-40:6	Analyte	12.8	C45H78NO7P	60.2939	0.120749	3.01973	201.817	3.8999	6.37788	116.707	-0.702314	2.31864	146.568	-0.944011	2.06442
plasma_Female01_LILY_rpMS1_posneg_1_Splash	PE	PE P-40:7	Analyte	11.5	C45H76NO7P	60.2939	NA	1.00781	NA	NA	NA	NA	NA	NA	146.568	NA	1.1129
plasma_Female01_LILY_rpMS1_posneg_1_Splash	PI	PI 33:1	DeutISTD	9.5	C42H79O13P	NA	NA	NA	NA	NA	NA	NA	NA	NA	59.8528	NA	2.65311
plasma_Female01_LILY_rpMS1_posneg_1_Splash	PI	PI 34:1	ESTD	10.6	H81C43O13P	NA	NA	NA	NA	NA	NA	114.565	0.636114	1.42411	59.8528	-0.298149	0.985811
plasma_Female01_LILY_rpMS1_posneg_1_Splash	PI	PI 34:2	Analyte	9	C43H79O13P	NA	NA	NA	NA	NA	NA	114.565	-1.74152	1.66955	59.8528	-2.30534	1.71636
plasma_Female01_LILY_rpMS1_posneg_1_Splash	PI	PI 36:1	Analyte	12.1	H85C45O13P	NA	NA	NA	NA	NA	NA	114.565	1.37009	1.74042	59.8528	6.34393	1.68083
plasma_Female01_LILY_rpMS1_posneg_1_Splash	PI	PI 36:2	Analyte	11	H83C45O13P	NA	NA	NA	NA	NA	NA	114.565	5.43685	6.35121	59.8528	10.8727	9.20382
plasma_Female01_LILY_rpMS1_posneg_1_Splash	PI	PI 36:4	Analyte	8.7	H79C45O13P	NA	NA	NA	NA	NA	NA	114.565	-1.80887	2.0435	59.8528	-1.07043	2.21207
plasma_Female01_LILY_rpMS1_posneg_1_Splash	PI	PI 38:3	Analyte	11.4	C47H85O13P	NA	NA	NA	NA	NA	NA	114.565	-0.928719	2.11283	59.8528	35.5475	14.1509
plasma_Female01_LILY_rpMS1_posneg_1_Splash	PI	PI 38:4	Analyte	10.7	C47H83O13P	NA	NA	NA	NA	NA	NA	114.565	12.3831	36.5216	59.8528	19.8118	48.2553
plasma_Female01_LILY_rpMS1_posneg_1_Splash	PI	PI 38:5	Analyte	8.9	C47H81O13P	NA	NA	NA	NA	NA	NA	NA	NA	NA	59.8528	-1.97982	1.09933
plasma_Female01_LILY_rpMS1_posneg_1_Splash	PI	PI 40:6	Analyte	10.1	C49H83O13P	NA	NA	NA	NA	NA	NA	NA	NA	NA	59.8528	2.12778	0.852502
plasma_Female01_LILY_rpMS1_posneg_1_Splash	PS	PS 33:1	DeutISTD	10	C39H74NO10P	NA	NA	NA	NA	NA	NA	NA	NA	NA	46.9951	NA	0.9303
plasma_Female01_LILY_rpMS1_posneg_1_Splash	TG	TG 40:0	Analyte	16.3	C43H82O6	42.3543	NA	0.0560787	NA	NA	NA	NA	NA	NA	186.613	NA	0.152293
plasma_Female01_LILY_rpMS1_posneg_1_Splash	TG	TG 42:1	Analyte	16.3	C45H84O6	NA	NA	NA	NA	NA	NA	NA	NA	NA	186.613	NA	0.170678
plasma_Female01_LILY_rpMS1_posneg_1_Splash	TG	TG 44:0	Analyte	16.9	C47H90O6	NA	NA	NA	NA	NA	NA	NA	NA	NA	186.613	NA	0.485741
plasma_Female01_LILY_rpMS1_posneg_1_Splash	TG	TG 44:1	Analyte	16.6	C47H88O6	NA	NA	NA	NA	NA	NA	NA	NA	NA	186.613	NA	0.390052
plasma_Female01_LILY_rpMS1_posneg_1_Splash	TG	TG 44:2	Analyte	16.4	C47H86O6	NA	NA	NA	NA	NA	NA	NA	NA	NA	186.613	NA	0.28665
plasma_Female01_LILY_rpMS1_posneg_1_Splash	TG	TG 46:0	Analyte	17.1	C49H94O6	NA	NA	NA	NA	NA	NA	NA	NA	NA	186.613	NA	0.727023
plasma_Female01_LILY_rpMS1_posneg_1_Splash	TG	TG 46:1	Analyte	16.9	C49H92O6	42.3543	NA	0.890505	NA	NA	NA	NA	NA	NA	186.613	NA	1.87372
plasma_Female01_LILY_rpMS1_posneg_1_Splash	TG	TG 46:2	Analyte	16.7	C49H90O6	42.3543	-1.33116	0.974557	NA	NA	NA	NA	NA	NA	186.613	0.434666	2.07504
plasma_Female01_LILY_rpMS1_posneg_1_Splash	TG	TG 46:3	Analyte	16.4	C49H88O6	NA	NA	NA	NA	NA	NA	NA	NA	NA	186.613	NA	0.434787
plasma_Female01_LILY_rpMS1_posneg_1_Splash	TG	TG 48:0	ESTD	17.3	C51H98O6	42.3543	0.071354	1.12153	NA	NA	NA	NA	NA	NA	186.613	6.2825	2.25188
plasma_Female01_LILY_rpMS1_posneg_1_Splash	TG	TG 48:1	Analyte	17.1	H96C51O6	42.3543	-0.773831	2.5456	NA	NA	NA	NA	NA	NA	186.613	6.5691	5.94104
plasma_Female01_LILY_rpMS1_posneg_1_Splash	TG	TG 48:1	DeutISTD	17.1	C51H96O6	NA	NA	NA	NA	NA	NA	NA	NA	NA	186.613	6.5691	65.8032
plasma_Female01_LILY_rpMS1_posneg_1_Splash	TG	TG 48:2	Analyte	16.9	H94C51O6	42.3543	-2.04638	3.21608	NA	NA	NA	NA	NA	NA	186.613	12.9309	8.18939
plasma_Female01_LILY_rpMS1_posneg_1_Splash	TG	TG 48:3	ESTD	16.7	C51H92O6	42.3543	NA	1.78282	NA	NA	NA	NA	NA	NA	186.613	NA	2.89334
plasma_Female01_LILY_rpMS1_posneg_1_Splash	TG	TG 48:4	Analyte	16.4	H90C51O6	42.3543	-2.43085	0.742788	NA	NA	NA	NA	NA	NA	186.613	-0.594309	1.15856
plasma_Female01_LILY_rpMS1_posneg_1_Splash	TG	TG 49:3	Analyte	16.8	C52 H94 O6	NA	NA	NA	NA	NA	NA	NA	NA	NA	186.613	NA	0.594
plasma_Female01_LILY_rpMS1_posneg_1_Splash	TG	TG 50:0	Analyte	17.5	C53H102O6	42.3543	-0.295207	0.646598	NA	NA	NA	NA	NA	NA	186.613	11.3065	2.69967
plasma_Female01_LILY_rpMS1_posneg_1_Splash	TG	TG 50:1	Analyte	17.3	H100C53O6	42.3543	-0.856464	10.336	NA	NA	NA	NA	NA	NA	186.613	11.5672	44.6613
plasma_Female01_LILY_rpMS1_posneg_1_Splash	TG	TG 50:2	Analyte	17.1	H98C53O6	42.3543	-0.808073	13.4421	NA	NA	NA	NA	NA	NA	186.613	11.7787	62.3246
plasma_Female01_LILY_rpMS1_posneg_1_Splash	TG	TG 50:3	Analyte	16.9	H96C53O6	42.3543	0.292573	10.865	NA	NA	NA	NA	NA	NA	186.613	12.7288	37.9227
plasma_Female01_LILY_rpMS1_posneg_1_Splash	TG	TG 50:4	Analyte	16.7	H94C53O6	42.3543	-0.500307	3.83355	NA	NA	NA	NA	NA	NA	186.613	1.03589	6.15764
plasma_Female01_LILY_rpMS1_posneg_1_Splash	TG	TG 51:3	Analyte	17	H98C54O6	42.3543	-0.7724	2.05547	NA	NA	NA	NA	NA	NA	186.613	0.185746	3.41535
plasma_Female01_LILY_rpMS1_posneg_1_Splash	TG	TG 52:1	Analyte	17.5	C55H104O6	42.3543	0.446935	4.00954	NA	NA	NA	NA	NA	NA	186.613	1.97994	7.45213
plasma_Female01_LILY_rpMS1_posneg_1_Splash	TG	TG 52:2	Analyte	17.3	H102C55O6	42.3543	1.92628	25.8062	NA	NA	NA	NA	NA	NA	186.613	9.25514	62.7995
plasma_Female01_LILY_rpMS1_posneg_1_Splash	TG	TG 52:3	Analyte	17.1	H100C55O6	42.3543	-0.394672	50.3925	NA	NA	NA	NA	NA	NA	186.613	3.55636	115.706
plasma_Female01_LILY_rpMS1_posneg_1_Splash	TG	TG 52:4	Analyte	16.9	H98C55O6	42.3543	-0.373819	33.0191	NA	NA	NA	NA	NA	NA	186.613	7.59538	127.506
plasma_Female01_LILY_rpMS1_posneg_1_Splash	TG	TG 52:5	Analyte	16.8	H96C55O6	42.3543	-0.651199	8.51841	NA	NA	NA	NA	NA	NA	186.613	3.23246	24.839
plasma_Female01_LILY_rpMS1_posneg_1_Splash	TG	TG 52:6	Analyte	16.6	H94C55O6	42.3543	-1.46065	1.33089	NA	NA	NA	NA	NA	NA	186.613	0.777666	3.95561
plasma_Female01_LILY_rpMS1_posneg_1_Splash	TG	TG 52:7	Analyte	16.4	H92C55O6	42.3543	-0.970963	0.173752	NA	NA	NA	NA	NA	NA	186.613	4.08732	0.677595
plasma_Female01_LILY_rpMS1_posneg_1_Splash	TG	TG 52:8	Analyte	16.2	H90C55O6	42.3543	NA	0.0318339	NA	NA	NA	NA	NA	NA	186.613	NA	0.291235
plasma_Female01_LILY_rpMS1_posneg_1_Splash	TG	TG 53:3	Analyte	17.2	H102C56O6	42.3543	-2.10234	0.995045	NA	NA	NA	NA	NA	NA	186.613	1.28258	3.8847
plasma_Female01_LILY_rpMS1_posneg_1_Splash	TG	TG 54:2	Analyte	17.5	H106C57O6	42.3543	-0.694897	3.15618	NA	NA	NA	NA	NA	NA	186.613	3.83101	9.24409
plasma_Female01_LILY_rpMS1_posneg_1_Splash	TG	TG 54:3	ESTD	17.3	C57H104O6	42.3543	-0.082833	13.3062	NA	NA	NA	NA	NA	NA	186.613	3.87911	32.0087
plasma_Female01_LILY_rpMS1_posneg_1_Splash	TG	TG 54:4	Analyte	17.1	H102C57O6	42.3543	-0.445914	21.8384	NA	NA	NA	NA	NA	NA	186.613	4.98031	57.005
plasma_Female01_LILY_rpMS1_posneg_1_Splash	TG	TG 54:5	Analyte	16.9	H100C57O6	42.3543	0.177039	26.4101	NA	NA	NA	NA	NA	NA	186.613	10.0364	124.086
plasma_Female01_LILY_rpMS1_posneg_1_Splash	TG	TG 54:6	ESTD	16.8	C57H98O6	42.3543	-0.3399	13.0442	NA	NA	NA	NA	NA	NA	186.613	3.63039	34.6607
plasma_Female01_LILY_rpMS1_posneg_1_Splash	TG	TG 54:7	Analyte	16.6	H96C57O6	42.3543	-1.57158	3.50255	NA	NA	NA	NA	NA	NA	186.613	1.08226	7.68412
plasma_Female01_LILY_rpMS1_posneg_1_Splash	TG	TG 54:9	ESTD	16.1	C57H92O6	NA	NA	NA	NA	NA	NA	NA	NA	NA	186.613	NA	0.254955
plasma_Female01_LILY_rpMS1_posneg_1_Splash	TG	TG 56:7	Analyte	16.9	C59H100O6	42.3543	-1.94604	7.81709	NA	NA	NA	NA	NA	NA	186.613	43.2609	91.0255
plasma_Female01_LILY_rpMS1_posneg_1_Splash	TG	TG 56:8	Analyte	16.7	C59H98O6	42.3543	NA	4.58375	NA	NA	NA	NA	NA	NA	186.613	NA	43.4435
plasma_Female01_LILY_rpMS1_posneg_1_Splash	TG	TG 56:9	Analyte	16.5	C59H96O6	42.3543	6.44404	3.34794	NA	NA	NA	NA	NA	NA	186.613	5.30088	2.76801
plasma_Female01_LILY_rpMS1_posneg_1_Splash	TG	TG 58:6	Analyte	17.2	C61 H106 O6	42.3543	NA	0.64716	NA	NA	NA	NA	NA	NA	186.613	NA	1.33446
plasma_Female01_LILY_rpMS1_posneg_1_Splash	TG	TG 58:7	Analyte	17	C61H104O6	42.3543	-1.06019	1.1947	NA	NA	NA	NA	NA	NA	186.613	34.6813	13.7138
plasma_Female01_LILY_rpMS1_posneg_1_Splash	TG	TG 58:8	Analyte	17	C61 H102 O6	42.3543	4.91701	1.8444	NA	NA	NA	NA	NA	NA	186.613	122.413	18.5001
plasma_Female01_LILY_rpMS1_posneg_1_Splash	TG	TG 58:9	Analyte	16.8	C61 H100 O6	42.3543	0.898874	2.1052	NA	NA	NA	NA	NA	NA	186.613	12.4022	6.06511
plasma_Female01_LILY_rpMS1_posneg_1_Splash	TG	TG 60:10	Analyte	16.8	C63 H102 O6	42.3543	NA	0.337276	NA	NA	NA	NA	NA	NA	186.613	NA	1.22779
plasma_Female01_LILY_rpMS1_posneg_1_Splash	TG	TG 60:9	Analyte	17	C63 H104 O6	42.3543	NA	0.251497	NA	NA	NA	NA	NA	NA	186.613	NA	0.941893
plasma_Female01_LILY_rpMS1_posneg_1_Splash	SE	ZE 18:2	Analyte	17.6	H74 C45 O2	NA	NA	NA	NA	NA	NA	NA	NA	NA	25.2481	NA	207.16
plasma_Female01_LILY_rpMS1_posneg_2_Splash	SE	CE 16:0	ESTD	18.2	C43H76O2	NA	NA	NA	NA	NA	NA	NA	NA	NA	25.2481	3.55126	261.424
plasma_Female01_LILY_rpMS1_posneg_2_Splash	SE	CE 17:0	Analyte	18.4	C44 H78 O2	NA	NA	NA	NA	NA	NA	NA	NA	NA	25.2481	NA	7.68657
plasma_Female01_LILY_rpMS1_posneg_2_Splash	SE	CE 18:0	ESTD	18.6	C45H80O2	NA	NA	NA	NA	NA	NA	NA	NA	NA	25.2481	17.3164	40.0464
plasma_Female01_LILY_rpMS1_posneg_2_Splash	SE	CE 18:1	Analyte	18.1	C45 H78 O2	NA	NA	NA	NA	NA	NA	NA	NA	NA	25.2481	-2.99293	65.621
plasma_Female01_LILY_rpMS1_posneg_2_Splash	SE	CE 18:1	DeutISTD	18.1	C45H78O2	NA	NA	NA	NA	NA	NA	NA	NA	NA	25.2481	-2.99293	45.1185
plasma_Female01_LILY_rpMS1_posneg_2_Splash	SE	CE 18:2	ESTD	17.9	C45H76O2	NA	NA	NA	NA	NA	NA	NA	NA	NA	25.2481	-1.13607	898.126
plasma_Female01_LILY_rpMS1_posneg_2_Splash	SE	CE 18:3	Analyte	17.6	C45 H74 O2	NA	NA	NA	NA	NA	NA	NA	NA	NA	25.2481	0.000105709	65.0452
plasma_Female01_LILY_rpMS1_posneg_2_Splash	SE	CE 20:3	Analyte	17.9	C47 H78 O2	NA	NA	NA	NA	NA	NA	NA	NA	NA	25.2481	-0.455039	15.6225
plasma_Female01_LILY_rpMS1_posneg_2_Splash	SE	CE 20:4	Analyte	17.7	C47 H76 O2	NA	NA	NA	NA	NA	NA	NA	NA	NA	25.2481	2.06418	392.136
plasma_Female01_LILY_rpMS1_posneg_2_Splash	SE	CE 20:5	Analyte	17.4	C47 H74 O2	NA	NA	NA	NA	NA	NA	NA	NA	NA	25.2481	3.84231	44.6629
plasma_Female01_LILY_rpMS1_posneg_2_Splash	SE	CE 22:6	Analyte	17.5	C49 H76 O2	NA	NA	NA	NA	NA	NA	NA	NA	NA	25.2481	2.82711	53.3873
plasma_Female01_LILY_rpMS1_posneg_2_Splash	Cer	Cer 34:1;2	ESTD	12.6	C34H67NO3	NA	NA	NA	NA	NA	NA	NA	3.73008	0.44076	NA	5.27689	0.52828
plasma_Female01_LILY_rpMS1_posneg_2_Splash	Cer	Cer 36:1;2	ESTD	13.7	C36H71NO3	NA	NA	NA	NA	NA	NA	NA	1.19393	0.200873	NA	NA	0.167862
plasma_Female01_LILY_rpMS1_posneg_2_Splash	Cer	Cer 38:1;2	Analyte	14.7	C38H75NO3	NA	NA	NA	NA	NA	NA	NA	3.77371	0.248967	NA	NA	0.17095
plasma_Female01_LILY_rpMS1_posneg_2_Splash	Cer	Cer 40:1;2	Analyte	15.4	C40H79NO3	NA	NA	NA	NA	NA	NA	NA	4.11885	1.10205	NA	5.90022	1.14371
plasma_Female01_LILY_rpMS1_posneg_2_Splash	Cer	Cer 40:2;2	Analyte	14.8	C40H77NO3	NA	NA	NA	NA	NA	NA	NA	3.69146	0.223195	NA	4.45088	0.241392
plasma_Female01_LILY_rpMS1_posneg_2_Splash	Cer	Cer 41:1;2	Analyte	15.7	C41H81NO3	NA	NA	NA	NA	NA	NA	NA	1.48689	1.07239	NA	2.01472	1.09139
plasma_Female01_LILY_rpMS1_posneg_2_Splash	Cer	Cer 42:0;2	ESTD	16.1	C42H85NO3	NA	NA	NA	NA	NA	NA	NA	NA	0.159842	NA	NA	0.261499
plasma_Female01_LILY_rpMS1_posneg_2_Splash	Cer	Cer 42:1;2	ESTD	16	C42H83NO3	NA	NA	NA	NA	NA	NA	NA	5.34878	3.698	NA	7.05206	4.17858
plasma_Female01_LILY_rpMS1_posneg_2_Splash	Cer	Cer 42:2;2	ESTD	15.4	C42H81NO3	NA	NA	NA	NA	NA	NA	NA	1.60065	0.963691	NA	0.292781	0.78904
plasma_Female01_LILY_rpMS1_posneg_2_Splash	Cer	Cer 42:3;2	Analyte	14.7	C42H79NO3	NA	NA	NA	NA	NA	NA	NA	NA	0.303961	NA	NA	0.325948
plasma_Female01_LILY_rpMS1_posneg_2_Splash	Co	Co Q10	ESTD	16.8	C59H90O4	NA	NA	NA	NA	NA	NA	NA	NA	NA	NA	NA	0.78611
plasma_Female01_LILY_rpMS1_posneg_2_Splash	DG	DG 30:0	Analyte	13.4	C33 H64 O5	NA	NA	NA	NA	NA	NA	NA	NA	NA	81.5706	-2.07379	0.359318
plasma_Female01_LILY_rpMS1_posneg_2_Splash	DG	DG 32:0	ESTD	14.4	C35H68O5	NA	NA	NA	NA	NA	NA	NA	NA	NA	81.5706	-0.983759	0.89859
plasma_Female01_LILY_rpMS1_posneg_2_Splash	DG	DG 32:1	Analyte	13.5	C35H66O5	NA	NA	NA	NA	NA	NA	NA	NA	NA	81.5706	NA	0.476614
plasma_Female01_LILY_rpMS1_posneg_2_Splash	DG	DG 32:2	Analyte	12.5	H64C35O5	NA	NA	NA	NA	NA	NA	NA	NA	NA	81.5706	NA	0.260726
plasma_Female01_LILY_rpMS1_posneg_2_Splash	DG	DG 33:1	DeutISTD	13.9	C36H68O5	41.4932	NA	2.69907	NA	NA	NA	NA	NA	NA	81.5706	NA	5.48207
plasma_Female01_LILY_rpMS1_posneg_2_Splash	DG	DG 34:0	Analyte	15.2	C37H72O5	41.4932	NA	0.507449	NA	NA	NA	NA	NA	NA	81.5706	NA	0.917815
plasma_Female01_LILY_rpMS1_posneg_2_Splash	DG	DG 34:1	ESTD	14.4	C37H70O5	41.4932	-1.03827	1.07842	NA	NA	NA	NA	NA	NA	81.5706	-0.431748	1.55974
plasma_Female01_LILY_rpMS1_posneg_2_Splash	DG	DG 34:2	Analyte	13.7	H68C37O5	41.4932	NA	0.75004	NA	NA	NA	NA	NA	NA	81.5706	NA	1.14005
plasma_Female01_LILY_rpMS1_posneg_2_Splash	DG	DG 34:3	Analyte	12.6	H66C37O5	41.4932	NA	0.233246	NA	NA	NA	NA	NA	NA	81.5706	NA	0.586411
plasma_Female01_LILY_rpMS1_posneg_2_Splash	DG	DG 36:0	Analyte	15.8	C39H76O5	41.4932	NA	0.823427	NA	NA	NA	NA	NA	NA	81.5706	NA	1.34401
plasma_Female01_LILY_rpMS1_posneg_2_Splash	DG	DG 36:1	Analyte	15.2	H74C39O5	NA	NA	NA	NA	NA	NA	NA	NA	NA	81.5706	NA	0.508537
plasma_Female01_LILY_rpMS1_posneg_2_Splash	DG	DG 36:2	ESTD	14.5	C39H72O5	41.4932	-1.52589	0.946194	NA	NA	NA	NA	NA	NA	81.5706	-0.511262	1.84422
plasma_Female01_LILY_rpMS1_posneg_2_Splash	DG	DG 36:3	Analyte	13.7	H70C39O5	41.4932	-1.61365	1.7842	NA	NA	NA	NA	NA	NA	81.5706	-0.958183	3.13041
plasma_Female01_LILY_rpMS1_posneg_2_Splash	DG	DG 36:4	Analyte	12.8	H68C39O5	41.4932	-1.54125	0.977291	NA	NA	NA	NA	NA	NA	81.5706	-0.93735	1.48971
plasma_Female01_LILY_rpMS1_posneg_2_Splash	DG	DG 36:5	Analyte	11.9	H66C39O5	NA	NA	NA	NA	NA	NA	NA	NA	NA	81.5706	NA	0.119313
plasma_Female01_LILY_rpMS1_posneg_2_Splash	DG	DG 38:3	Analyte	14.6	C41 H74 O5	NA	NA	NA	NA	NA	NA	NA	NA	NA	81.5706	NA	0.338783
plasma_Female01_LILY_rpMS1_posneg_2_Splash	DG	DG 38:4	ESTD	14.4	C41H72O5	NA	NA	NA	NA	NA	NA	NA	NA	NA	81.5706	NA	0.349088
plasma_Female01_LILY_rpMS1_posneg_2_Splash	DG	DG 38:5	Analyte	13.5	C41H70O5	41.4932	NA	0.274941	NA	NA	NA	NA	NA	NA	81.5706	NA	0.538617
plasma_Female01_LILY_rpMS1_posneg_2_Splash	DG	DG 38:6	Analyte	12.5	C41 H68 O5	NA	NA	NA	NA	NA	NA	NA	NA	NA	81.5706	NA	0.58655
plasma_Female01_LILY_rpMS1_posneg_2_Splash	SE	EE 18:0	Analyte	18	H78 C46 O2	NA	NA	NA	NA	NA	NA	NA	NA	NA	25.2481	NA	97.516
plasma_Female01_LILY_rpMS1_posneg_2_Splash	HexCer	HexCer 42:1;2	Analyte	15.3	C48H93NO8	NA	NA	NA	NA	NA	NA	NA	NA	NA	NA	-1.97527	0.793311
plasma_Female01_LILY_rpMS1_posneg_2_Splash	LPC	LPC 14:0	Analyte	2.2	C22H46NO7P	NA	NA	NA	NA	NA	NA	NA	NA	NA	65.7659	1.93593	0.845354
plasma_Female01_LILY_rpMS1_posneg_2_Splash	LPC	LPC 15:0	Analyte	2.5	C23H48NO7P	286.248	12.4351	1.72649	NA	NA	NA	NA	NA	NA	65.7659	1.82031	0.614333
plasma_Female01_LILY_rpMS1_posneg_2_Splash	LPC	LPC 16:0	ESTD	2.8	C24H50NO7P	286.248	25.2734	249.537	NA	NA	NA	64.7639	-0.0675593	42.2018	65.7659	-0.229256	43.6554
plasma_Female01_LILY_rpMS1_posneg_2_Splash	LPC	LPC 17:0	Analyte	3.2	C25H52NO7P	286.248	15.7275	4.26219	NA	NA	NA	NA	NA	NA	65.7659	0.914974	1.22614
plasma_Female01_LILY_rpMS1_posneg_2_Splash	LPC	LPC 18:0	ESTD	3.6	C26H54NO7P	286.248	29.2932	27.2294	NA	NA	NA	64.7639	-1.52189	14.9467	65.7659	1.6445	19.226
plasma_Female01_LILY_rpMS1_posneg_2_Splash	LPC	LPC 18:1	Analyte	2.9	H52C26NO7P	286.248	30.7626	53.8871	NA	NA	NA	64.7639	-1.07539	9.83561	65.7659	-1.00776	10.6342
plasma_Female01_LILY_rpMS1_posneg_2_Splash	LPC	LPC 18:1	DeutISTD	2.8	C26H52NO7P	NA	NA	NA	NA	NA	NA	NA	NA	NA	65.7659	-1.00776	13.0764
plasma_Female01_LILY_rpMS1_posneg_2_Splash	LPC	LPC 18:2	Analyte	2.4	H50C26NO7P	286.248	7.11383	45.396	NA	NA	NA	64.7639	-0.470433	22.1706	65.7659	0.28858	24.2056
plasma_Female01_LILY_rpMS1_posneg_2_Splash	LPC	LPC 18:3	Analyte	2.1	H48C26NO7P	NA	NA	NA	NA	NA	NA	64.7639	7.08648	1.09251	65.7659	6.10183	1.14592
plasma_Female01_LILY_rpMS1_posneg_2_Splash	LPC	LPC 20:1	Analyte	3.7	C28H56NO7P	NA	NA	NA	NA	NA	NA	NA	NA	NA	65.7659	8.34886	0.119336
plasma_Female01_LILY_rpMS1_posneg_2_Splash	LPC	LPC 20:2	Analyte	3	C28H54NO7P	NA	NA	NA	NA	NA	NA	64.7639	15.9841	0.862314	65.7659	4.47786	0.293662
plasma_Female01_LILY_rpMS1_posneg_2_Splash	LPC	LPC 20:3	Analyte	2.6	C28H52NO7P	286.248	4.71092	2.21794	NA	NA	NA	64.7639	6.57304	2.73845	65.7659	6.8692	2.76225
plasma_Female01_LILY_rpMS1_posneg_2_Splash	LPC	LPC 20:4	Analyte	2.3	C28H50NO7P	286.248	7.23678	9.80336	NA	NA	NA	64.7639	4.19949	8.27867	65.7659	5.87883	9.12363
plasma_Female01_LILY_rpMS1_posneg_2_Splash	LPC	LPC 20:5	Analyte	2.1	C28H48NO7P	NA	NA	NA	NA	NA	NA	64.7639	7.78617	0.950384	65.7659	7.5422	0.789918
plasma_Female01_LILY_rpMS1_posneg_2_Splash	LPC	LPC 22:4	Analyte	2.7	C30H54NO7P	NA	NA	NA	NA	NA	NA	NA	NA	NA	65.7659	5.30789	0.21559
plasma_Female01_LILY_rpMS1_posneg_2_Splash	LPC	LPC 22:5	Analyte	2.4	C30H52NO7P	NA	NA	NA	NA	NA	NA	64.7639	6.37783	0.923467	65.7659	5.74101	0.735822
plasma_Female01_LILY_rpMS1_posneg_2_Splash	LPC	LPC 22:6	Analyte	2.2	C30H50NO7P	NA	NA	NA	NA	NA	NA	64.7639	8.63267	1.88278	65.7659	9.47532	1.82295
plasma_Female01_LILY_rpMS1_posneg_2_Splash	LPC	LPC O-16:0	Analyte	3.2	C24 H52 O6 N1 P1	286.248	12.0513	2.10178	NA	NA	NA	NA	NA	NA	65.7659	2.3228	0.700356
plasma_Female01_LILY_rpMS1_posneg_2_Splash	LPC	LPC O-16:1	Analyte	3.1	C24 H50 O6 N1 P1	286.248	NA	2.20413	NA	NA	NA	NA	NA	NA	65.7659	NA	0.723817
plasma_Female01_LILY_rpMS1_posneg_2_Splash	LPC	LPC O-18:1	Analyte	4.1	C26 H54 O6 N1 P1	NA	NA	NA	NA	NA	NA	NA	NA	NA	65.7659	-0.90848	0.228117
plasma_Female01_LILY_rpMS1_posneg_2_Splash	LPE	LPE 16:0	Analyte	2.9	H44C21NO7P	NA	NA	NA	NA	NA	NA	107.506	2.49567	1.07385	100.734	2.71099	1.04144
plasma_Female01_LILY_rpMS1_posneg_2_Splash	LPE	LPE 18:0	ESTD	3.8	H48C23NO7P	NA	NA	NA	NA	NA	NA	107.506	0.708065	1.16919	100.734	0.827119	1.41029
plasma_Female01_LILY_rpMS1_posneg_2_Splash	LPE	LPE 18:1	DeutISTD	3	C23H46NO7P	NA	NA	NA	NA	NA	NA	107.506	1.36616	4.51205	100.734	NA	3.95048
plasma_Female01_LILY_rpMS1_posneg_2_Splash	LPE	LPE 18:2	Analyte	2.5	H44C23NO7P	NA	NA	NA	NA	NA	NA	107.506	2.9838	3.23709	100.734	3.83293	3.55478
plasma_Female01_LILY_rpMS1_posneg_2_Splash	LPE	LPE 22:6	Analyte	2.3	C27H44NO7P	NA	NA	NA	NA	NA	NA	107.506	4.95051	1.12564	100.734	6.28443	1.23573
plasma_Female01_LILY_rpMS1_posneg_2_Splash	PC	PC 30:0	Analyte	10.1	C38H76NO8P	NA	0.0074994	0.712451	NA	NA	NA	84.9997	-0.226819	0.841991	95.683	0.461465	0.90492
plasma_Female01_LILY_rpMS1_posneg_2_Splash	PC	PC 31:0	Analyte	11.1	C39H78NO8P	NA	13.7766	1.07418	NA	NA	NA	NA	NA	NA	95.683	5.86468	0.748762
plasma_Female01_LILY_rpMS1_posneg_2_Splash	PC	PC 32:0	ESTD	11.9	C40H80NO8P	NA	4.84221	4.52756	NA	NA	NA	84.9997	-1.82125	4.00732	95.683	-1.31431	4.34274
plasma_Female01_LILY_rpMS1_posneg_2_Splash	PC	PC 32:1	Analyte	10.3	H78C40NO8P	NA	-0.0199914	5.5521	NA	NA	NA	84.9997	-1.41756	5.16871	95.683	0.174428	5.73824
plasma_Female01_LILY_rpMS1_posneg_2_Splash	PC	PC 32:2	Analyte	8.7	H76C40NO8P	NA	0.607864	2.02528	NA	NA	NA	84.9997	-1.98542	1.30561	95.683	-0.658421	1.78689
plasma_Female01_LILY_rpMS1_posneg_2_Splash	PC	PC 33:0	Analyte	12.3	C41 H82 O8 N1 P1	NA	NA	NA	NA	NA	NA	NA	NA	NA	95.683	-0.651722	0.359769
plasma_Female01_LILY_rpMS1_posneg_2_Splash	PC	PC 33:1	Analyte	11.2	H80C41NO8P	NA	18.7663	5.88632	NA	NA	NA	84.9997	3.32484	2.91192	95.683	6.2087	3.07772
plasma_Female01_LILY_rpMS1_posneg_2_Splash	PC	PC 33:2	Analyte	9.7	H78C41NO8P	NA	9.14238	19.6296	NA	NA	NA	84.9997	-0.202048	3.72842	95.683	0.78157	5.05249
plasma_Female01_LILY_rpMS1_posneg_2_Splash	PC	PC 34:0	ESTD	13.1	C42 H84 O8 N1 P1	NA	12.1794	5.32202	NA	NA	NA	84.9997	2.73633	2.68117	95.683	3.47542	2.8099
plasma_Female01_LILY_rpMS1_posneg_2_Splash	PC	PC 34:1	ESTD	12	C42H82NO8P	NA	-1.40658	63.041	NA	NA	NA	84.9997	-2.12067	48.1494	95.683	-1.78146	57.6215
plasma_Female01_LILY_rpMS1_posneg_2_Splash	PC	PC 34:2	ESTD	10.7	C42H80NO8P	NA	-0.55428	191.547	NA	NA	NA	84.9997	0.730053	253.166	95.683	0.648908	242.179
plasma_Female01_LILY_rpMS1_posneg_2_Splash	PC	PC 34:3	Analyte	9.2	H78C42NO8P	NA	-3.22977	5.03226	NA	NA	NA	84.9997	-2.49798	5.77716	95.683	-2.01714	6.76244
plasma_Female01_LILY_rpMS1_posneg_2_Splash	PC	PC 34:4	Analyte	8.4	H76C42NO8P	NA	0.0455125	0.687102	NA	NA	NA	84.9997	0.932281	0.904154	95.683	3.79822	1.44392
plasma_Female01_LILY_rpMS1_posneg_2_Splash	PC	PC 34:5	Analyte	7.1	H74C42NO8P	NA	NA	NA	NA	NA	NA	NA	NA	NA	95.683	85.6806	0.39731
plasma_Female01_LILY_rpMS1_posneg_2_Splash	PC	PC 35:0	Analyte	13.6	C43 H86 O8 N1 P1	NA	NA	NA	NA	NA	NA	NA	NA	NA	95.683	NA	0.132071
plasma_Female01_LILY_rpMS1_posneg_2_Splash	PC	PC 35:1	Analyte	12.5	H84C43NO8P	NA	-3.07828	0.34068	NA	NA	NA	NA	NA	NA	95.683	-2.92816	0.488182
plasma_Female01_LILY_rpMS1_posneg_2_Splash	PC	PC 35:2	Analyte	11.4	H82C43NO8P	NA	-1.42987	4.66667	NA	NA	NA	84.9997	-0.919959	3.45502	95.683	-2.52083	2.9532
plasma_Female01_LILY_rpMS1_posneg_2_Splash	PC	PC 35:3	Analyte	9.9	H80C43NO8P	NA	0.292387	0.504926	NA	NA	NA	NA	NA	NA	95.683	1.43221	1.17438
plasma_Female01_LILY_rpMS1_posneg_2_Splash	PC	PC 35:4	Analyte	9.4	H78C43NO8P	NA	5.73919	1.68487	NA	NA	NA	84.9997	1.05188	1.26884	95.683	-0.135175	1.65067
plasma_Female01_LILY_rpMS1_posneg_2_Splash	PC	PC 35:5	Analyte	8	H76C43NO8P	NA	NA	NA	NA	NA	NA	NA	NA	NA	95.683	-4.06069	0.410405
plasma_Female01_LILY_rpMS1_posneg_2_Splash	PC	PC 36:0	ESTD	14.1	H88C44NO8P	NA	NA	NA	NA	NA	NA	84.9997	-0.0242568	0.359462	95.683	-0.0953893	0.419767
plasma_Female01_LILY_rpMS1_posneg_2_Splash	PC	PC 36:1	ESTD	13.2	H86C44NO8P	NA	14.5145	70.279	NA	NA	NA	84.9997	2.64183	28.4099	95.683	2.93474	29.9946
plasma_Female01_LILY_rpMS1_posneg_2_Splash	PC	PC 36:2	ESTD	12.4	C44H84NO8P	NA	3.24856	204.399	NA	NA	NA	84.9997	1.05921	155.991	95.683	3.66254	213.357
plasma_Female01_LILY_rpMS1_posneg_2_Splash	PC	PC 36:3	Analyte	11.1	H82C44NO8P	NA	-0.982896	60.5636	NA	NA	NA	NA	NA	NA	95.683	0.371101	73.891
plasma_Female01_LILY_rpMS1_posneg_2_Splash	PC	PC 36:5	Analyte	9	H78C44NO8P	NA	-1.21003	7.06146	NA	NA	NA	84.9997	0.024299	8.52913	95.683	1.55178	11.2989
plasma_Female01_LILY_rpMS1_posneg_2_Splash	PC	PC 37:1	Analyte	13.7	C45 H88 O8 N1 P1	NA	NA	NA	NA	NA	NA	NA	NA	NA	95.683	NA	0.418333
plasma_Female01_LILY_rpMS1_posneg_2_Splash	PC	PC 37:3	Analyte	11.9	H84C45NO8P	NA	NA	NA	NA	NA	NA	NA	NA	NA	95.683	2.31404	1.16292
plasma_Female01_LILY_rpMS1_posneg_2_Splash	PC	PC 37:4	Analyte	11.3	H82C45NO8P	NA	4.95631	2.66478	NA	NA	NA	NA	NA	NA	95.683	-2.19729	3.29983
plasma_Female01_LILY_rpMS1_posneg_2_Splash	PC	PC 37:6	Analyte	8.8	C45H78NO8P	NA	4.26435	0.476593	NA	NA	NA	NA	NA	NA	95.683	1.52533	0.707101
plasma_Female01_LILY_rpMS1_posneg_2_Splash	PC	PC 38:0	Analyte	14.9	C46 H92 O8 N1 P1	NA	NA	NA	NA	NA	NA	NA	NA	NA	95.683	NA	0.122192
plasma_Female01_LILY_rpMS1_posneg_2_Splash	PC	PC 38:1	Analyte	14.1	C46 H90 O8 N1 P1	NA	NA	NA	NA	NA	NA	84.9997	NA	0.72795	95.683	NA	1.31793
plasma_Female01_LILY_rpMS1_posneg_2_Splash	PC	PC 38:2	Analyte	13.3	C46 H88 O8 N1 P1	NA	43.0334	7.59813	NA	NA	NA	84.9997	10.8615	3.44366	95.683	30.3611	9.63353
plasma_Female01_LILY_rpMS1_posneg_2_Splash	PC	PC 38:3	Analyte	12.6	H86C46NO8P	NA	1.24375	24.9546	NA	NA	NA	84.9997	-0.454349	19.5308	95.683	1.74967	24.4254
plasma_Female01_LILY_rpMS1_posneg_2_Splash	PC	PC 38:4	ESTD	12.1	H84C46NO8P	NA	0.652788	93.267	NA	NA	NA	84.9997	-1.08889	71.4843	95.683	0.634849	93.0264
plasma_Female01_LILY_rpMS1_posneg_2_Splash	PC	PC 38:5	Analyte	10.5	H82C46NO8P	NA	-1.78893	20.6695	NA	NA	NA	NA	NA	NA	95.683	-1.0092	25.2515
plasma_Female01_LILY_rpMS1_posneg_2_Splash	PC	PC 38:6	ESTD	9.8	C46H80NO8P	NA	-2.71622	26.1943	NA	NA	NA	84.9997	3.19735	50.7639	95.683	3.80588	52.2029
plasma_Female01_LILY_rpMS1_posneg_2_Splash	PC	PC 40:0	ESTD	15.6	C48 H96 O8 N1 P1	NA	NA	NA	NA	NA	NA	NA	NA	NA	95.683	NA	0.134197
plasma_Female01_LILY_rpMS1_posneg_2_Splash	PC	PC 40:5	Analyte	12.1	C48H86NO8P	NA	2.26795	6.61444	NA	NA	NA	84.9997	1.28938	6.15271	95.683	2.09902	6.68654
plasma_Female01_LILY_rpMS1_posneg_2_Splash	PC	PC 40:6	ESTD	11.7	C48H84NO8P	NA	0.494661	15.7068	NA	NA	NA	84.9997	-0.933534	11.7897	95.683	-0.0662809	14.1605
plasma_Female01_LILY_rpMS1_posneg_2_Splash	PC	PC 40:7	Analyte	10	C48H82NO8P	NA	0.615679	2.57792	NA	NA	NA	84.9997	2.30778	3.51523	95.683	3.6026	4.45099
plasma_Female01_LILY_rpMS1_posneg_2_Splash	PC	PC 40:8	Analyte	8.5	C48H80NO8P	NA	3.41764	1.25439	NA	NA	NA	84.9997	1.02078	0.990356	95.683	3.57037	1.32291
plasma_Female01_LILY_rpMS1_posneg_2_Splash	PC	PC O-32:0	Analyte	12.8	C40 H82 O7 N1 P1	NA	13.7766	4.13721	NA	NA	NA	84.9997	2.1253	1.78768	95.683	5.86468	2.23951
plasma_Female01_LILY_rpMS1_posneg_2_Splash	PC	PC O-34:0	Analyte	13.8	C42 H86 O7 N1 P1	NA	NA	NA	NA	NA	NA	NA	NA	NA	95.683	-0.651722	0.272684
plasma_Female01_LILY_rpMS1_posneg_2_Splash	PC	PC P-32:0	Analyte	12.6	C40H80NO7P	NA	NA	NA	NA	NA	NA	84.9997	1.51089	2.00604	95.683	1.59869	1.86884
plasma_Female01_LILY_rpMS1_posneg_2_Splash	PC	PC P-32:1	Analyte	11.4	C40H78NO7P	NA	13.2796	1.24506	NA	NA	NA	NA	NA	NA	95.683	7.00308	0.831513
plasma_Female01_LILY_rpMS1_posneg_2_Splash	PC	PC P-34:0	Analyte	12.8	C42 H84 O7 N1 P1	NA	18.7663	10.1093	NA	NA	NA	84.9997	3.32484	3.64601	95.683	6.2087	4.95332
plasma_Female01_LILY_rpMS1_posneg_2_Splash	PC	PC P-34:1	Analyte	11.8	C42H82NO7P	NA	9.14238	2.87544	NA	NA	NA	84.9997	-0.202048	2.24588	95.683	0.78157	2.79996
plasma_Female01_LILY_rpMS1_posneg_2_Splash	PC	PC P-34:2	Analyte	11.6	C42H80NO7P	NA	-1.44488	3.89215	NA	NA	NA	84.9997	-2.31819	3.0264	95.683	-1.76715	3.76417
plasma_Female01_LILY_rpMS1_posneg_2_Splash	PC	PC P-36:2	Analyte	11.9	C44H84NO7P	NA	0.292387	3.60103	NA	NA	NA	84.9997	-0.568331	3.34918	95.683	1.43221	3.92361
plasma_Female01_LILY_rpMS1_posneg_2_Splash	PC	PC P-36:3	Analyte	11.6	C44H82NO7P	NA	5.73919	22.0112	NA	NA	NA	84.9997	1.05188	13.2697	95.683	-0.135175	12.5317
plasma_Female01_LILY_rpMS1_posneg_2_Splash	PC	PC P-38:2	Analyte	13.4	C46 H88 O7 N1 P1	NA	0.620024	1.26262	NA	NA	NA	84.9997	-0.96087	0.820761	95.683	2.31404	1.71853
plasma_Female01_LILY_rpMS1_posneg_2_Splash	PC	PC P-38:4	Analyte	11.7	C46H84NO7P	NA	0.164233	8.92493	NA	NA	NA	84.9997	-1.52541	6.63446	95.683	-0.221941	8.79548
plasma_Female01_LILY_rpMS1_posneg_2_Splash	PC	PC P-38:5	Analyte	11.4	C46H82NO7P	NA	4.26435	7.18821	NA	NA	NA	NA	NA	NA	95.683	1.52533	4.33997
plasma_Female01_LILY_rpMS1_posneg_2_Splash	PC	PC P-38:6	Analyte	10.8	C46 H80 O7 N1 P1	NA	-1.26442	0.515829	NA	NA	NA	84.9997	-0.0242568	0.958741	95.683	-0.0953893	0.82719
plasma_Female01_LILY_rpMS1_posneg_2_Splash	PC	PC P-40:2	Analyte	14.1	C48 H92 O7 N1 P1	NA	NA	NA	NA	NA	NA	NA	NA	NA	95.683	NA	0.738161
plasma_Female01_LILY_rpMS1_posneg_2_Splash	PC	PC P-40:5	Analyte	11.8	C48H86NO7P	NA	NA	NA	NA	NA	NA	NA	NA	NA	95.683	NA	1.28702
plasma_Female01_LILY_rpMS1_posneg_2_Splash	PC	PC P-40:6	Analyte	11.2	C48H84NO7P	NA	-0.129327	0.99577	NA	NA	NA	84.9997	-1.06249	0.793637	95.683	-1.17396	0.766054
plasma_Female01_LILY_rpMS1_posneg_2_Splash	PC	PC P-40:7	Analyte	10.9	C48 H82 O7 N1 P1	NA	NA	0.268046	NA	NA	NA	84.9997	NA	0.335051	95.683	NA	0.354996
plasma_Female01_LILY_rpMS1_posneg_2_Splash	PC	PC P-42:2	Analyte	14.9	C50 H96 O7 N1 P1	NA	NA	NA	NA	NA	NA	NA	NA	NA	95.683	NA	0.905656
plasma_Female01_LILY_rpMS1_posneg_2_Splash	PE	PE 33:1	DeutISTD	11.7	C38H74NO8P	60.2939	NA	2.04363	201.817	NA	6.12998	116.707	NA	3.52129	146.568	NA	4.74672
plasma_Female01_LILY_rpMS1_posneg_2_Splash	PE	PE 34:1	ESTD	12.5	C39H76NO8P	60.2939	4.20324	1.2646	201.817	9.11455	1.94608	116.707	2.72247	1.22579	146.568	2.06938	1.10186
plasma_Female01_LILY_rpMS1_posneg_2_Splash	PE	PE 34:2	Analyte	11.3	H74C39NO8P	60.2939	1.20957	2.1238	201.817	9.41708	4.25548	116.707	-1.16404	1.77378	146.568	-0.827086	1.7537
plasma_Female01_LILY_rpMS1_posneg_2_Splash	PE	PE 36:1	Analyte	13.6	H80C41NO8P	60.2939	4.19757	2.56525	201.817	1.2121	1.83641	116.707	1.0442	1.74871	146.568	0.602027	1.54726
plasma_Female01_LILY_rpMS1_posneg_2_Splash	PE	PE 36:2	ESTD	12.7	C41H78NO8P	60.2939	0.921812	6.87033	NA	NA	NA	NA	NA	NA	146.568	-1.78449	4.82957
plasma_Female01_LILY_rpMS1_posneg_2_Splash	PE	PE 36:3	Analyte	11.5	H76C41NO8P	60.2939	-2.53369	1.72944	201.817	-2.08803	2.2737	116.707	-3.77346	1.3477	146.568	-2.13159	1.91658
plasma_Female01_LILY_rpMS1_posneg_2_Splash	PE	PE 36:4	Analyte	10	H74C41NO8P	60.2939	-7.37409	0.364927	201.817	-7.05243	0.605539	116.707	-7.37188	0.321989	146.568	-6.96316	0.592142
plasma_Female01_LILY_rpMS1_posneg_2_Splash	PE	PE 38:4	Analyte	12.5	C43H78NO8P	60.2939	1.47646	9.67756	201.817	8.34553	17.3776	116.707	-1.66129	5.86811	146.568	-0.66002	7.14763
plasma_Female01_LILY_rpMS1_posneg_2_Splash	PE	PE 38:5	Analyte	11.2	C43 H76 O8 N1 P1	60.2939	-3.23969	0.484529	201.817	5.47951	3.1033	116.707	-0.407114	1.68261	146.568	-2.95577	0.487489
plasma_Female01_LILY_rpMS1_posneg_2_Splash	PE	PE 38:6	Analyte	10.5	C43H74NO8P	60.2939	-1.38928	1.81952	201.817	3.19762	3.72565	116.707	-2.44232	1.40512	146.568	-1.46111	1.91428
plasma_Female01_LILY_rpMS1_posneg_2_Splash	PE	PE 40:6	Analyte	12.1	C45H78NO8P	60.2939	0.985974	1.631	201.817	4.94146	2.47933	116.707	-0.9254	1.06794	146.568	-0.620412	1.23995
plasma_Female01_LILY_rpMS1_posneg_2_Splash	PE	PE P-34:1	Analyte	13.2	C39 H76 O7 N1 P1	60.2939	4.61522	2.53336	201.817	1.42058	1.35087	116.707	1.85883	1.35981	146.568	1.42653	1.53062
plasma_Female01_LILY_rpMS1_posneg_2_Splash	PE	PE P-36:1	Analyte	14.1	C41H80NO7P	60.2939	1.67915	1.46233	201.817	0.414734	1.1423	116.707	0.753614	1.19276	146.568	-0.208772	0.971719
plasma_Female01_LILY_rpMS1_posneg_2_Splash	PE	PE P-36:2	Analyte	13.4	C41H78NO7P	60.2939	6.54063	7.533	201.817	3.08047	4.90049	116.707	1.9429	4.17793	146.568	1.26077	3.86818
plasma_Female01_LILY_rpMS1_posneg_2_Splash	PE	PE P-36:3	Analyte	12.2	C41 H76 O7 N1 P1	60.2939	2.21729	3.57977	201.817	8.58735	6.41728	116.707	0.0297389	2.33059	146.568	0.0560675	2.38031
plasma_Female01_LILY_rpMS1_posneg_2_Splash	PE	PE P-36:4	Analyte	11.9	C41H74NO7P	60.2939	-1.57913	4.5154	201.817	5.21971	36.5323	116.707	0.0741825	13.2667	146.568	-1.46982	5.66293
plasma_Female01_LILY_rpMS1_posneg_2_Splash	PE	PE P-36:5	Analyte	10.8	C41 H72 O7 N1 P1	60.2939	NA	0.310958	201.817	NA	0.338034	116.707	NA	0.400953	146.568	NA	0.544572
plasma_Female01_LILY_rpMS1_posneg_2_Splash	PE	PE P-38:3	Analyte	13.3	C43 H80 O7 N1 P1	60.2939	5.15569	2.99774	NA	NA	NA	NA	NA	NA	146.568	1.35237	1.77296
plasma_Female01_LILY_rpMS1_posneg_2_Splash	PE	PE P-38:4	Analyte	13.2	C43H78NO7P	60.2939	12.207	47.0715	201.817	4.82511	23.0725	116.707	3.27051	18.3226	146.568	4.19781	22.1064
plasma_Female01_LILY_rpMS1_posneg_2_Splash	PE	PE P-38:5	Analyte	12	C43H76NO7P	60.2939	3.25791	14.918	201.817	9.35699	26.4017	116.707	2.12973	12.3617	146.568	0.862217	9.9322
plasma_Female01_LILY_rpMS1_posneg_2_Splash	PE	PE P-38:6	Analyte	11.4	C43 H74 O7 N1 P1	60.2939	-0.478919	4.08654	201.817	0.508764	5.31136	116.707	-1.53413	2.57399	146.568	0.0936123	4.7751
plasma_Female01_LILY_rpMS1_posneg_2_Splash	PE	PE P-40:4	Analyte	14.2	C45 H82 O7 N1 P1	60.2939	-2.64976	0.498191	201.817	-0.600943	2.1269	116.707	-0.634704	0.889364	146.568	-0.0728426	0.863933
plasma_Female01_LILY_rpMS1_posneg_2_Splash	PE	PE P-40:5	Analyte	13.2	C45H80NO7P	60.2939	3.19237	4.1263	201.817	-0.464288	1.63866	116.707	-0.31036	1.59032	146.568	0.333671	2.36188
plasma_Female01_LILY_rpMS1_posneg_2_Splash	PE	PE P-40:6	Analyte	12.8	C45H78NO7P	60.2939	0.120749	3.07098	201.817	3.8999	6.25005	116.707	-0.702314	2.2799	146.568	-0.944011	2.09333
plasma_Female01_LILY_rpMS1_posneg_2_Splash	PE	PE P-40:7	Analyte	11.5	C45H76NO7P	60.2939	NA	1.08613	NA	NA	NA	NA	NA	NA	146.568	NA	1.2065
plasma_Female01_LILY_rpMS1_posneg_2_Splash	PI	PI 33:1	DeutISTD	9.5	C42H79O13P	NA	NA	NA	NA	NA	NA	NA	NA	NA	59.8528	NA	2.62239
plasma_Female01_LILY_rpMS1_posneg_2_Splash	PI	PI 34:1	ESTD	10.6	H81C43O13P	NA	NA	NA	NA	NA	NA	114.565	0.636114	1.35366	59.8528	-0.298149	1.22891
plasma_Female01_LILY_rpMS1_posneg_2_Splash	PI	PI 34:2	Analyte	9	C43H79O13P	NA	NA	NA	NA	NA	NA	114.565	-1.74152	1.69476	59.8528	-2.30534	1.51862
plasma_Female01_LILY_rpMS1_posneg_2_Splash	PI	PI 36:2	Analyte	11	H83C45O13P	NA	NA	NA	NA	NA	NA	114.565	5.43685	7.13568	59.8528	10.8727	7.24263
plasma_Female01_LILY_rpMS1_posneg_2_Splash	PI	PI 36:4	Analyte	8.7	H79C45O13P	NA	NA	NA	NA	NA	NA	114.565	-1.80887	2.18042	59.8528	-1.07043	2.31064
plasma_Female01_LILY_rpMS1_posneg_2_Splash	PI	PI 38:3	Analyte	11.4	C47H85O13P	NA	NA	NA	NA	NA	NA	114.565	-0.928719	2.37365	59.8528	35.5475	10.7537
plasma_Female01_LILY_rpMS1_posneg_2_Splash	PI	PI 38:4	Analyte	10.7	C47H83O13P	NA	NA	NA	NA	NA	NA	114.565	12.3831	40.8975	59.8528	19.8118	35.0926
plasma_Female01_LILY_rpMS1_posneg_2_Splash	PI	PI 38:5	Analyte	8.9	C47H81O13P	NA	NA	NA	NA	NA	NA	NA	NA	NA	59.8528	-1.97982	0.810092
plasma_Female01_LILY_rpMS1_posneg_2_Splash	PI	PI 40:6	Analyte	10.1	C49H83O13P	NA	NA	NA	NA	NA	NA	NA	NA	NA	59.8528	2.12778	0.828816
plasma_Female01_LILY_rpMS1_posneg_2_Splash	PS	PS 33:1	DeutISTD	10	C39H74NO10P	NA	NA	NA	NA	NA	NA	NA	NA	NA	46.9951	NA	0.962425
plasma_Female01_LILY_rpMS1_posneg_2_Splash	TG	TG 40:0	Analyte	16.3	C43H82O6	NA	NA	NA	NA	NA	NA	NA	NA	NA	186.613	NA	0.162329
plasma_Female01_LILY_rpMS1_posneg_2_Splash	TG	TG 42:1	Analyte	16.3	C45H84O6	NA	NA	NA	NA	NA	NA	NA	NA	NA	186.613	NA	0.180171
plasma_Female01_LILY_rpMS1_posneg_2_Splash	TG	TG 44:0	Analyte	16.9	C47H90O6	NA	NA	NA	NA	NA	NA	NA	NA	NA	186.613	NA	0.544423
plasma_Female01_LILY_rpMS1_posneg_2_Splash	TG	TG 44:1	Analyte	16.6	C47H88O6	NA	NA	NA	NA	NA	NA	NA	NA	NA	186.613	NA	0.456139
plasma_Female01_LILY_rpMS1_posneg_2_Splash	TG	TG 44:2	Analyte	16.4	C47H86O6	NA	NA	NA	NA	NA	NA	NA	NA	NA	186.613	NA	0.310649
plasma_Female01_LILY_rpMS1_posneg_2_Splash	TG	TG 46:0	Analyte	17.1	C49H94O6	NA	NA	NA	NA	NA	NA	NA	NA	NA	186.613	NA	0.714256
plasma_Female01_LILY_rpMS1_posneg_2_Splash	TG	TG 46:1	Analyte	16.9	C49H92O6	42.3543	NA	0.818317	NA	NA	NA	NA	NA	NA	186.613	NA	1.8078
plasma_Female01_LILY_rpMS1_posneg_2_Splash	TG	TG 46:2	Analyte	16.7	C49H90O6	42.3543	-1.33116	0.921125	NA	NA	NA	NA	NA	NA	186.613	0.434666	2.06749
plasma_Female01_LILY_rpMS1_posneg_2_Splash	TG	TG 46:3	Analyte	16.4	C49H88O6	NA	NA	NA	NA	NA	NA	NA	NA	NA	186.613	NA	0.438641
plasma_Female01_LILY_rpMS1_posneg_2_Splash	TG	TG 48:0	ESTD	17.3	C51H98O6	42.3543	0.071354	1.05979	NA	NA	NA	NA	NA	NA	186.613	6.2825	2.24035
plasma_Female01_LILY_rpMS1_posneg_2_Splash	TG	TG 48:1	Analyte	17.1	H96C51O6	42.3543	-0.773831	2.1851	NA	NA	NA	NA	NA	NA	186.613	6.5691	5.15153
plasma_Female01_LILY_rpMS1_posneg_2_Splash	TG	TG 48:1	DeutISTD	17.1	C51H96O6	NA	NA	NA	NA	NA	NA	NA	NA	NA	186.613	6.5691	67.228
plasma_Female01_LILY_rpMS1_posneg_2_Splash	TG	TG 48:2	Analyte	16.9	H94C51O6	42.3543	-2.04638	2.9426	NA	NA	NA	NA	NA	NA	186.613	12.9309	7.85615
plasma_Female01_LILY_rpMS1_posneg_2_Splash	TG	TG 48:3	ESTD	16.7	C51H92O6	42.3543	NA	1.70389	NA	NA	NA	NA	NA	NA	186.613	NA	2.86034
plasma_Female01_LILY_rpMS1_posneg_2_Splash	TG	TG 48:4	Analyte	16.4	H90C51O6	42.3543	-2.43085	0.758971	NA	NA	NA	NA	NA	NA	186.613	-0.594309	1.13172
plasma_Female01_LILY_rpMS1_posneg_2_Splash	TG	TG 49:3	Analyte	16.8	C52 H94 O6	NA	NA	NA	NA	NA	NA	NA	NA	NA	186.613	NA	0.56936
plasma_Female01_LILY_rpMS1_posneg_2_Splash	TG	TG 50:0	Analyte	17.5	C53H102O6	42.3543	-0.295207	0.608824	NA	NA	NA	NA	NA	NA	186.613	11.3065	2.5387
plasma_Female01_LILY_rpMS1_posneg_2_Splash	TG	TG 50:1	Analyte	17.3	H100C53O6	42.3543	-0.856464	10.7693	NA	NA	NA	NA	NA	NA	186.613	11.5672	47.2189
plasma_Female01_LILY_rpMS1_posneg_2_Splash	TG	TG 50:2	Analyte	17.1	H98C53O6	42.3543	-0.808073	13.5457	NA	NA	NA	NA	NA	NA	186.613	11.7787	63.0318
plasma_Female01_LILY_rpMS1_posneg_2_Splash	TG	TG 50:3	Analyte	16.9	H96C53O6	42.3543	0.292573	10.1751	NA	NA	NA	NA	NA	NA	186.613	12.7288	34.534
plasma_Female01_LILY_rpMS1_posneg_2_Splash	TG	TG 50:4	Analyte	16.7	H94C53O6	42.3543	-0.500307	3.74927	NA	NA	NA	NA	NA	NA	186.613	1.03589	6.02078
plasma_Female01_LILY_rpMS1_posneg_2_Splash	TG	TG 50:5	Analyte	16.5	H92C53O6	42.3543	-0.597264	0.667872	NA	NA	NA	NA	NA	NA	186.613	3.07293	2.25964
plasma_Female01_LILY_rpMS1_posneg_2_Splash	TG	TG 51:3	Analyte	17	H98C54O6	42.3543	-0.7724	2.00698	NA	NA	NA	NA	NA	NA	186.613	0.185746	3.68009
plasma_Female01_LILY_rpMS1_posneg_2_Splash	TG	TG 52:1	Analyte	17.5	C55H104O6	42.3543	0.446935	3.9439	NA	NA	NA	NA	NA	NA	186.613	1.97994	8.03522
plasma_Female01_LILY_rpMS1_posneg_2_Splash	TG	TG 52:2	Analyte	17.3	H102C55O6	42.3543	1.92628	26.3442	NA	NA	NA	NA	NA	NA	186.613	9.25514	64.0929
plasma_Female01_LILY_rpMS1_posneg_2_Splash	TG	TG 52:3	Analyte	17.1	H100C55O6	42.3543	-0.394672	50.3791	NA	NA	NA	NA	NA	NA	186.613	3.55636	115.675
plasma_Female01_LILY_rpMS1_posneg_2_Splash	TG	TG 52:4	Analyte	16.9	H98C55O6	42.3543	-0.373819	33.9663	NA	NA	NA	NA	NA	NA	186.613	7.59538	132.954
plasma_Female01_LILY_rpMS1_posneg_2_Splash	TG	TG 52:5	Analyte	16.8	H96C55O6	42.3543	-0.651199	8.45458	NA	NA	NA	NA	NA	NA	186.613	3.23246	24.6411
plasma_Female01_LILY_rpMS1_posneg_2_Splash	TG	TG 52:6	Analyte	16.6	H94C55O6	42.3543	-1.46065	1.21434	NA	NA	NA	NA	NA	NA	186.613	0.777666	3.74404
plasma_Female01_LILY_rpMS1_posneg_2_Splash	TG	TG 52:7	Analyte	16.4	H92C55O6	42.3543	-0.970963	0.204226	NA	NA	NA	NA	NA	NA	186.613	4.08732	0.76011
plasma_Female01_LILY_rpMS1_posneg_2_Splash	TG	TG 52:8	Analyte	16.2	H90C55O6	42.3543	NA	0.0338401	NA	NA	NA	NA	NA	NA	186.613	NA	0.295026
plasma_Female01_LILY_rpMS1_posneg_2_Splash	TG	TG 53:3	Analyte	17.2	H102C56O6	42.3543	-2.10234	1.01082	NA	NA	NA	NA	NA	NA	186.613	1.28258	3.93399
plasma_Female01_LILY_rpMS1_posneg_2_Splash	TG	TG 53:8	Analyte	16.2	H92C56O6	NA	NA	NA	NA	NA	NA	NA	NA	NA	186.613	NA	0.161561
plasma_Female01_LILY_rpMS1_posneg_2_Splash	TG	TG 54:2	Analyte	17.5	H106C57O6	42.3543	-0.694897	2.98806	NA	NA	NA	NA	NA	NA	186.613	3.83101	8.77706
plasma_Female01_LILY_rpMS1_posneg_2_Splash	TG	TG 54:3	ESTD	17.3	C57H104O6	42.3543	-0.082833	12.9075	NA	NA	NA	NA	NA	NA	186.613	3.87911	31.0854
plasma_Female01_LILY_rpMS1_posneg_2_Splash	TG	TG 54:4	Analyte	17.1	H102C57O6	42.3543	-0.445914	21.053	NA	NA	NA	NA	NA	NA	186.613	4.98031	52.8979
plasma_Female01_LILY_rpMS1_posneg_2_Splash	TG	TG 54:5	Analyte	16.9	H100C57O6	42.3543	0.177039	26.4545	NA	NA	NA	NA	NA	NA	186.613	10.0364	124.319
plasma_Female01_LILY_rpMS1_posneg_2_Splash	TG	TG 54:6	ESTD	16.8	C57H98O6	42.3543	-0.3399	13.2672	NA	NA	NA	NA	NA	NA	186.613	3.63039	35.2758
plasma_Female01_LILY_rpMS1_posneg_2_Splash	TG	TG 54:7	Analyte	16.6	H96C57O6	42.3543	-1.57158	3.55495	NA	NA	NA	NA	NA	NA	186.613	1.08226	7.23549
plasma_Female01_LILY_rpMS1_posneg_2_Splash	TG	TG 54:9	ESTD	16.1	C57H92O6	NA	NA	NA	NA	NA	NA	NA	NA	NA	186.613	NA	0.26798
plasma_Female01_LILY_rpMS1_posneg_2_Splash	TG	TG 56:7	Analyte	16.9	C59H100O6	42.3543	-1.94604	7.40338	NA	NA	NA	NA	NA	NA	186.613	43.2609	108.402
plasma_Female01_LILY_rpMS1_posneg_2_Splash	TG	TG 56:8	Analyte	16.7	C59H98O6	42.3543	NA	4.43219	NA	NA	NA	NA	NA	NA	186.613	NA	54.8984
plasma_Female01_LILY_rpMS1_posneg_2_Splash	TG	TG 56:9	Analyte	16.5	C59H96O6	42.3543	6.44404	3.28666	NA	NA	NA	NA	NA	NA	186.613	5.30088	2.99863
plasma_Female01_LILY_rpMS1_posneg_2_Splash	TG	TG 58:6	Analyte	17.2	C61 H106 O6	42.3543	NA	0.684992	NA	NA	NA	NA	NA	NA	186.613	NA	1.15365
plasma_Female01_LILY_rpMS1_posneg_2_Splash	TG	TG 58:7	Analyte	17	C61H104O6	42.3543	-1.06019	1.25686	NA	NA	NA	NA	NA	NA	186.613	34.6813	17.5848
plasma_Female01_LILY_rpMS1_posneg_2_Splash	TG	TG 58:8	Analyte	17	C61 H102 O6	42.3543	4.91701	1.76427	NA	NA	NA	NA	NA	NA	186.613	122.413	22.8652
plasma_Female01_LILY_rpMS1_posneg_2_Splash	TG	TG 58:9	Analyte	16.8	C61 H100 O6	42.3543	0.898874	1.99685	NA	NA	NA	NA	NA	NA	186.613	12.4022	6.19403
plasma_Female01_LILY_rpMS1_posneg_2_Splash	TG	TG 60:10	Analyte	16.8	C63 H102 O6	42.3543	NA	0.325825	NA	NA	NA	NA	NA	NA	186.613	NA	1.24071
plasma_Female01_LILY_rpMS1_posneg_2_Splash	TG	TG 60:9	Analyte	17	C63 H104 O6	42.3543	NA	0.223383	NA	NA	NA	NA	NA	NA	186.613	NA	0.852696
plasma_Female01_LILY_rpMS1_posneg_2_Splash	SE	ZE 18:2	Analyte	17.6	H74 C45 O2	NA	NA	NA	NA	NA	NA	NA	NA	NA	25.2481	NA	153.243
plasma_Female01_LILY_rpMS1_posneg_3_Splash	SE	CE 16:0	ESTD	18.2	C43H76O2	NA	NA	NA	NA	NA	NA	NA	NA	NA	25.2481	3.55126	296.404
plasma_Female01_LILY_rpMS1_posneg_3_Splash	SE	CE 16:1	Analyte	17.8	C43 H74 O2	NA	NA	NA	NA	NA	NA	NA	NA	NA	25.2481	-3.48446	3.62048
plasma_Female01_LILY_rpMS1_posneg_3_Splash	SE	CE 17:0	Analyte	18.4	C44 H78 O2	NA	NA	NA	NA	NA	NA	NA	NA	NA	25.2481	NA	7.4344
plasma_Female01_LILY_rpMS1_posneg_3_Splash	SE	CE 18:0	ESTD	18.6	C45H80O2	NA	NA	NA	NA	NA	NA	NA	NA	NA	25.2481	17.3164	48.4547
plasma_Female01_LILY_rpMS1_posneg_3_Splash	SE	CE 18:1	Analyte	18.1	C45 H78 O2	NA	NA	NA	NA	NA	NA	NA	NA	NA	25.2481	-2.99293	72.766
plasma_Female01_LILY_rpMS1_posneg_3_Splash	SE	CE 18:1	DeutISTD	18.1	C45H78O2	NA	NA	NA	NA	NA	NA	NA	NA	NA	25.2481	-2.99293	55.7046
plasma_Female01_LILY_rpMS1_posneg_3_Splash	SE	CE 18:2	ESTD	17.9	C45H76O2	NA	NA	NA	NA	NA	NA	NA	NA	NA	25.2481	-1.13607	1034.75
plasma_Female01_LILY_rpMS1_posneg_3_Splash	SE	CE 18:3	Analyte	17.6	C45 H74 O2	NA	NA	NA	NA	NA	NA	NA	NA	NA	25.2481	0.000105709	73.2756
plasma_Female01_LILY_rpMS1_posneg_3_Splash	SE	CE 20:3	Analyte	17.9	C47 H78 O2	NA	NA	NA	NA	NA	NA	NA	NA	NA	25.2481	-0.455039	18.9322
plasma_Female01_LILY_rpMS1_posneg_3_Splash	SE	CE 20:4	Analyte	17.7	C47 H76 O2	NA	NA	NA	NA	NA	NA	NA	NA	NA	25.2481	2.06418	423.445
plasma_Female01_LILY_rpMS1_posneg_3_Splash	SE	CE 20:5	Analyte	17.4	C47 H74 O2	NA	NA	NA	NA	NA	NA	NA	NA	NA	25.2481	3.84231	49.1224
plasma_Female01_LILY_rpMS1_posneg_3_Splash	SE	CE 22:5	Analyte	17.7	C49 H78 O2	NA	NA	NA	NA	NA	NA	NA	NA	NA	25.2481	2.22339	5.04034
plasma_Female01_LILY_rpMS1_posneg_3_Splash	SE	CE 22:6	Analyte	17.5	C49 H76 O2	NA	NA	NA	NA	NA	NA	NA	NA	NA	25.2481	2.82711	56.2793
plasma_Female01_LILY_rpMS1_posneg_3_Splash	Cer	Cer 34:1;2	ESTD	12.6	C34H67NO3	NA	NA	NA	NA	NA	NA	NA	3.73008	0.399497	NA	5.27689	0.378475
plasma_Female01_LILY_rpMS1_posneg_3_Splash	Cer	Cer 36:1;2	ESTD	13.7	C36H71NO3	NA	NA	NA	NA	NA	NA	NA	1.19393	0.195445	NA	NA	0.164712
plasma_Female01_LILY_rpMS1_posneg_3_Splash	Cer	Cer 38:1;2	Analyte	14.7	C38H75NO3	NA	NA	NA	NA	NA	NA	NA	3.77371	0.242717	NA	NA	0.163567
plasma_Female01_LILY_rpMS1_posneg_3_Splash	Cer	Cer 40:1;2	Analyte	15.4	C40H79NO3	NA	NA	NA	NA	NA	NA	NA	4.11885	1.0947	NA	5.90022	1.16183
plasma_Female01_LILY_rpMS1_posneg_3_Splash	Cer	Cer 40:2;2	Analyte	14.8	C40H77NO3	NA	NA	NA	NA	NA	NA	NA	3.69146	0.225918	NA	4.45088	0.21894
plasma_Female01_LILY_rpMS1_posneg_3_Splash	Cer	Cer 41:1;2	Analyte	15.7	C41H81NO3	NA	NA	NA	NA	NA	NA	NA	1.48689	1.07426	NA	2.01472	1.06187
plasma_Female01_LILY_rpMS1_posneg_3_Splash	Cer	Cer 42:0;2	ESTD	16.1	C42H85NO3	NA	NA	NA	NA	NA	NA	NA	NA	0.160991	NA	NA	0.251387
plasma_Female01_LILY_rpMS1_posneg_3_Splash	Cer	Cer 42:1;2	ESTD	16	C42H83NO3	NA	NA	NA	NA	NA	NA	NA	5.34878	3.60451	NA	7.05206	3.97104
plasma_Female01_LILY_rpMS1_posneg_3_Splash	Cer	Cer 42:2;2	ESTD	15.4	C42H81NO3	NA	NA	NA	NA	NA	NA	NA	1.60065	0.905212	NA	0.292781	0.703875
plasma_Female01_LILY_rpMS1_posneg_3_Splash	Cer	Cer 42:3;2	Analyte	14.7	C42H79NO3	NA	NA	NA	NA	NA	NA	NA	NA	0.288845	NA	NA	0.321585
plasma_Female01_LILY_rpMS1_posneg_3_Splash	Co	Co Q10	ESTD	16.8	C59H90O4	NA	NA	NA	NA	NA	NA	NA	NA	NA	NA	NA	0.945274
plasma_Female01_LILY_rpMS1_posneg_3_Splash	DG	DG 32:0	ESTD	14.4	C35H68O5	41.4932	-1.37416	0.504511	NA	NA	NA	NA	NA	NA	81.5706	-0.983759	0.82324
plasma_Female01_LILY_rpMS1_posneg_3_Splash	DG	DG 32:1	Analyte	13.5	C35H66O5	NA	NA	NA	NA	NA	NA	NA	NA	NA	81.5706	NA	0.443191
plasma_Female01_LILY_rpMS1_posneg_3_Splash	DG	DG 32:2	Analyte	12.5	H64C35O5	NA	NA	NA	NA	NA	NA	NA	NA	NA	81.5706	NA	0.274678
plasma_Female01_LILY_rpMS1_posneg_3_Splash	DG	DG 33:1	DeutISTD	13.9	C36H68O5	41.4932	NA	2.66974	NA	NA	NA	NA	NA	NA	81.5706	NA	4.38288
plasma_Female01_LILY_rpMS1_posneg_3_Splash	DG	DG 34:0	Analyte	15.2	C37H72O5	41.4932	NA	0.626916	NA	NA	NA	NA	NA	NA	81.5706	NA	1.03375
plasma_Female01_LILY_rpMS1_posneg_3_Splash	DG	DG 34:1	ESTD	14.4	C37H70O5	41.4932	-1.03827	1.05998	NA	NA	NA	NA	NA	NA	81.5706	-0.431748	1.53352
plasma_Female01_LILY_rpMS1_posneg_3_Splash	DG	DG 34:2	Analyte	13.7	H68C37O5	41.4932	NA	0.74326	NA	NA	NA	NA	NA	NA	81.5706	NA	1.13124
plasma_Female01_LILY_rpMS1_posneg_3_Splash	DG	DG 34:3	Analyte	12.6	H66C37O5	41.4932	NA	0.264532	NA	NA	NA	NA	NA	NA	81.5706	NA	0.627587
plasma_Female01_LILY_rpMS1_posneg_3_Splash	DG	DG 36:0	Analyte	15.8	C39H76O5	41.4932	NA	0.829566	NA	NA	NA	NA	NA	NA	81.5706	NA	1.35101
plasma_Female01_LILY_rpMS1_posneg_3_Splash	DG	DG 36:1	Analyte	15.2	H74C39O5	NA	NA	NA	NA	NA	NA	NA	NA	NA	81.5706	NA	0.456477
plasma_Female01_LILY_rpMS1_posneg_3_Splash	DG	DG 36:2	ESTD	14.5	C39H72O5	41.4932	-1.52589	0.997182	NA	NA	NA	NA	NA	NA	81.5706	-0.511262	1.93316
plasma_Female01_LILY_rpMS1_posneg_3_Splash	DG	DG 36:3	Analyte	13.7	H70C39O5	41.4932	-1.61365	1.80757	NA	NA	NA	NA	NA	NA	81.5706	-0.958183	3.17031
plasma_Female01_LILY_rpMS1_posneg_3_Splash	DG	DG 36:4	Analyte	12.8	H68C39O5	41.4932	-1.54125	0.980734	NA	NA	NA	NA	NA	NA	81.5706	-0.93735	1.49427
plasma_Female01_LILY_rpMS1_posneg_3_Splash	DG	DG 36:5	Analyte	11.9	H66C39O5	NA	NA	NA	NA	NA	NA	NA	NA	NA	81.5706	NA	0.161435
plasma_Female01_LILY_rpMS1_posneg_3_Splash	DG	DG 38:3	Analyte	14.6	C41 H74 O5	NA	NA	NA	NA	NA	NA	NA	NA	NA	81.5706	NA	0.333955
plasma_Female01_LILY_rpMS1_posneg_3_Splash	DG	DG 38:4	ESTD	14.4	C41H72O5	NA	NA	NA	NA	NA	NA	NA	NA	NA	81.5706	NA	0.330692
plasma_Female01_LILY_rpMS1_posneg_3_Splash	DG	DG 38:5	Analyte	13.5	C41H70O5	41.4932	NA	0.269923	NA	NA	NA	NA	NA	NA	81.5706	NA	0.528644
plasma_Female01_LILY_rpMS1_posneg_3_Splash	DG	DG 38:6	Analyte	12.5	C41 H68 O5	NA	NA	NA	NA	NA	NA	NA	NA	NA	81.5706	NA	0.504807
plasma_Female01_LILY_rpMS1_posneg_3_Splash	SE	EE 18:0	Analyte	18	H78 C46 O2	NA	NA	NA	NA	NA	NA	NA	NA	NA	25.2481	NA	142.609
plasma_Female01_LILY_rpMS1_posneg_3_Splash	HexCer	HexCer 42:1;2	Analyte	15.3	C48H93NO8	NA	NA	NA	NA	NA	NA	NA	NA	NA	NA	-1.97527	0.806068
plasma_Female01_LILY_rpMS1_posneg_3_Splash	LPC	LPC 14:0	Analyte	2.2	C22H46NO7P	NA	NA	NA	NA	NA	NA	NA	NA	NA	65.7659	1.93593	0.765296
plasma_Female01_LILY_rpMS1_posneg_3_Splash	LPC	LPC 15:0	Analyte	2.5	C23H48NO7P	286.248	12.4351	1.71786	NA	NA	NA	NA	NA	NA	65.7659	1.82031	0.662255
plasma_Female01_LILY_rpMS1_posneg_3_Splash	LPC	LPC 16:0	ESTD	2.8	C24H50NO7P	286.248	25.2734	222.085	NA	NA	NA	64.7639	-0.0675593	45.9874	65.7659	-0.229256	43.7733
plasma_Female01_LILY_rpMS1_posneg_3_Splash	LPC	LPC 17:0	Analyte	3.2	C25H52NO7P	286.248	15.7275	3.65821	NA	NA	NA	64.7639	1.27111	1.48073	65.7659	0.914974	1.19606
plasma_Female01_LILY_rpMS1_posneg_3_Splash	LPC	LPC 18:0	ESTD	3.6	C26H54NO7P	286.248	29.2932	26.0302	NA	NA	NA	64.7639	-1.52189	14.917	65.7659	1.6445	17.8485
plasma_Female01_LILY_rpMS1_posneg_3_Splash	LPC	LPC 18:1	Analyte	2.9	H52C26NO7P	286.248	30.7626	47.758	NA	NA	NA	64.7639	-1.07539	9.72578	65.7659	-1.00776	9.74688
plasma_Female01_LILY_rpMS1_posneg_3_Splash	LPC	LPC 18:1	DeutISTD	2.8	C26H52NO7P	NA	NA	NA	NA	NA	NA	NA	NA	NA	65.7659	-1.00776	11.9739
plasma_Female01_LILY_rpMS1_posneg_3_Splash	LPC	LPC 18:2	Analyte	2.4	H50C26NO7P	286.248	7.11383	43.8007	NA	NA	NA	64.7639	-0.470433	21.4533	65.7659	0.28858	23.4161
plasma_Female01_LILY_rpMS1_posneg_3_Splash	LPC	LPC 18:3	Analyte	2.1	H48C26NO7P	NA	NA	NA	NA	NA	NA	64.7639	7.08648	1.31988	65.7659	6.10183	1.09804
plasma_Female01_LILY_rpMS1_posneg_3_Splash	LPC	LPC 20:1	Analyte	3.7	C28H56NO7P	NA	NA	NA	NA	NA	NA	NA	NA	NA	65.7659	8.34886	0.113116
plasma_Female01_LILY_rpMS1_posneg_3_Splash	LPC	LPC 20:2	Analyte	3	C28H54NO7P	NA	NA	NA	NA	NA	NA	64.7639	15.9841	0.845444	65.7659	4.47786	0.260525
plasma_Female01_LILY_rpMS1_posneg_3_Splash	LPC	LPC 20:3	Analyte	2.6	C28H52NO7P	286.248	4.71092	2.10665	NA	NA	NA	64.7639	6.57304	2.891	65.7659	6.8692	2.66135
plasma_Female01_LILY_rpMS1_posneg_3_Splash	LPC	LPC 20:4	Analyte	2.3	C28H50NO7P	286.248	7.23678	9.68168	NA	NA	NA	64.7639	4.19949	8.44635	65.7659	5.87883	9.03245
plasma_Female01_LILY_rpMS1_posneg_3_Splash	LPC	LPC 20:5	Analyte	2.1	C28H48NO7P	NA	NA	NA	NA	NA	NA	64.7639	7.78617	0.930401	65.7659	7.5422	0.767446
plasma_Female01_LILY_rpMS1_posneg_3_Splash	LPC	LPC 22:4	Analyte	2.7	C30H54NO7P	NA	NA	NA	NA	NA	NA	NA	NA	NA	65.7659	5.30789	0.188111
plasma_Female01_LILY_rpMS1_posneg_3_Splash	LPC	LPC 22:5	Analyte	2.4	C30H52NO7P	NA	NA	NA	NA	NA	NA	64.7639	6.37783	0.940748	65.7659	5.74101	0.740309
plasma_Female01_LILY_rpMS1_posneg_3_Splash	LPC	LPC 22:6	Analyte	2.2	C30H50NO7P	NA	NA	NA	NA	NA	NA	64.7639	8.63267	1.91536	65.7659	9.47532	1.83197
plasma_Female01_LILY_rpMS1_posneg_3_Splash	LPC	LPC O-16:0	Analyte	3.2	C24 H52 O6 N1 P1	286.248	12.0513	1.83657	NA	NA	NA	NA	NA	NA	65.7659	2.3228	0.692914
plasma_Female01_LILY_rpMS1_posneg_3_Splash	LPC	LPC O-16:1	Analyte	3.1	C24 H50 O6 N1 P1	286.248	NA	1.87383	NA	NA	NA	NA	NA	NA	65.7659	NA	0.702536
plasma_Female01_LILY_rpMS1_posneg_3_Splash	LPC	LPC O-18:1	Analyte	4.1	C26 H54 O6 N1 P1	NA	NA	NA	NA	NA	NA	NA	NA	NA	65.7659	-0.90848	0.222893
plasma_Female01_LILY_rpMS1_posneg_3_Splash	LPE	LPE 16:0	Analyte	2.9	H44C21NO7P	NA	NA	NA	NA	NA	NA	107.506	2.49567	1.07367	100.734	2.71099	1.16467
plasma_Female01_LILY_rpMS1_posneg_3_Splash	LPE	LPE 18:0	ESTD	3.8	H48C23NO7P	NA	NA	NA	NA	NA	NA	107.506	0.708065	1.30075	100.734	0.827119	1.42198
plasma_Female01_LILY_rpMS1_posneg_3_Splash	LPE	LPE 18:1	DeutISTD	3	C23H46NO7P	NA	NA	NA	NA	NA	NA	107.506	1.36616	4.70225	100.734	NA	4.11492
plasma_Female01_LILY_rpMS1_posneg_3_Splash	LPE	LPE 18:2	Analyte	2.5	H44C23NO7P	NA	NA	NA	NA	NA	NA	107.506	2.9838	3.34989	100.734	3.83293	3.89344
plasma_Female01_LILY_rpMS1_posneg_3_Splash	LPE	LPE 20:4	Analyte	2.4	C25H44NO7P	NA	NA	NA	NA	NA	NA	107.506	4.33676	2.65445	100.734	NA	3.10149
plasma_Female01_LILY_rpMS1_posneg_3_Splash	LPE	LPE 22:6	Analyte	2.3	C27H44NO7P	NA	NA	NA	NA	NA	NA	107.506	4.95051	1.05074	100.734	6.28443	1.28407
plasma_Female01_LILY_rpMS1_posneg_3_Splash	PC	PC 30:0	Analyte	10.1	C38H76NO8P	NA	0.0074994	0.750871	NA	NA	NA	84.9997	-0.226819	0.851556	95.683	0.461465	0.943492
plasma_Female01_LILY_rpMS1_posneg_3_Splash	PC	PC 31:0	Analyte	11.1	C39H78NO8P	NA	13.7766	1.31798	NA	NA	NA	NA	NA	NA	95.683	5.86468	0.866824
plasma_Female01_LILY_rpMS1_posneg_3_Splash	PC	PC 32:0	ESTD	11.9	C40H80NO8P	NA	4.84221	4.48778	NA	NA	NA	NA	NA	NA	95.683	-1.31431	4.30652
plasma_Female01_LILY_rpMS1_posneg_3_Splash	PC	PC 32:1	Analyte	10.3	H78C40NO8P	NA	-0.0199914	5.5751	NA	NA	NA	84.9997	-1.41756	4.87912	95.683	0.174428	5.76181
plasma_Female01_LILY_rpMS1_posneg_3_Splash	PC	PC 32:2	Analyte	8.7	H76C40NO8P	NA	0.607864	1.83702	NA	NA	NA	84.9997	-1.98542	1.35925	95.683	-0.658421	1.65282
plasma_Female01_LILY_rpMS1_posneg_3_Splash	PC	PC 33:0	Analyte	12.3	C41 H82 O8 N1 P1	NA	NA	NA	NA	NA	NA	NA	NA	NA	95.683	-0.651722	0.303004
plasma_Female01_LILY_rpMS1_posneg_3_Splash	PC	PC 33:1	Analyte	11.2	H80C41NO8P	NA	18.7663	7.71784	NA	NA	NA	84.9997	3.32484	2.85601	95.683	6.2087	3.94294
plasma_Female01_LILY_rpMS1_posneg_3_Splash	PC	PC 33:2	Analyte	9.7	H78C41NO8P	NA	9.14238	18.3471	NA	NA	NA	84.9997	-0.202048	3.41967	95.683	0.78157	4.80403
plasma_Female01_LILY_rpMS1_posneg_3_Splash	PC	PC 34:0	ESTD	13.1	C42 H84 O8 N1 P1	NA	12.1794	5.53506	NA	NA	NA	84.9997	2.73633	2.77714	95.683	3.47542	2.90545
plasma_Female01_LILY_rpMS1_posneg_3_Splash	PC	PC 34:1	ESTD	12	C42H82NO8P	NA	-1.40658	60.7409	NA	NA	NA	NA	NA	NA	95.683	-1.78146	55.5273
plasma_Female01_LILY_rpMS1_posneg_3_Splash	PC	PC 34:2	ESTD	10.7	C42H80NO8P	NA	-0.55428	192.904	NA	NA	NA	NA	NA	NA	95.683	0.648908	243.895
plasma_Female01_LILY_rpMS1_posneg_3_Splash	PC	PC 34:3	Analyte	9.2	H78C42NO8P	NA	-3.22977	5.07907	NA	NA	NA	84.9997	-2.49798	6.05758	95.683	-2.01714	6.81975
plasma_Female01_LILY_rpMS1_posneg_3_Splash	PC	PC 34:4	Analyte	8.4	H76C42NO8P	NA	0.0455125	0.716489	NA	NA	NA	84.9997	0.932281	0.920568	95.683	3.79822	1.48974
plasma_Female01_LILY_rpMS1_posneg_3_Splash	PC	PC 34:5	Analyte	7.1	H74C42NO8P	NA	NA	NA	NA	NA	NA	NA	NA	NA	95.683	85.6806	0.396127
plasma_Female01_LILY_rpMS1_posneg_3_Splash	PC	PC 35:0	Analyte	13.6	C43 H86 O8 N1 P1	NA	NA	NA	NA	NA	NA	NA	NA	NA	95.683	NA	0.134347
plasma_Female01_LILY_rpMS1_posneg_3_Splash	PC	PC 35:1	Analyte	12.5	H84C43NO8P	NA	-3.07828	0.307137	NA	NA	NA	NA	NA	NA	95.683	-2.92816	0.454303
plasma_Female01_LILY_rpMS1_posneg_3_Splash	PC	PC 35:2	Analyte	11.4	H82C43NO8P	NA	-1.42987	4.67399	NA	NA	NA	NA	NA	NA	95.683	-2.52083	2.9571
plasma_Female01_LILY_rpMS1_posneg_3_Splash	PC	PC 35:3	Analyte	9.9	H80C43NO8P	NA	0.292387	0.564201	NA	NA	NA	NA	NA	NA	95.683	1.43221	1.26838
plasma_Female01_LILY_rpMS1_posneg_3_Splash	PC	PC 35:4	Analyte	9.4	H78C43NO8P	NA	5.73919	1.77539	NA	NA	NA	84.9997	1.05188	1.21958	95.683	-0.135175	1.71959
plasma_Female01_LILY_rpMS1_posneg_3_Splash	PC	PC 35:5	Analyte	8	H76C43NO8P	NA	NA	NA	NA	NA	NA	NA	NA	NA	95.683	-4.06069	0.412094
plasma_Female01_LILY_rpMS1_posneg_3_Splash	PC	PC 36:0	ESTD	14.1	H88C44NO8P	NA	NA	NA	NA	NA	NA	84.9997	-0.0242568	0.429362	95.683	-0.0953893	0.432647
plasma_Female01_LILY_rpMS1_posneg_3_Splash	PC	PC 36:1	ESTD	13.2	H86C44NO8P	NA	14.5145	72.0711	NA	NA	NA	84.9997	2.64183	28.2638	95.683	2.93474	30.7521
plasma_Female01_LILY_rpMS1_posneg_3_Splash	PC	PC 36:2	ESTD	12.4	C44H84NO8P	NA	3.24856	202.87	NA	NA	NA	84.9997	1.05921	151.77	95.683	3.66254	211.701
plasma_Female01_LILY_rpMS1_posneg_3_Splash	PC	PC 36:3	Analyte	11.1	H82C44NO8P	NA	-0.982896	60.5833	NA	NA	NA	NA	NA	NA	95.683	0.371101	73.915
plasma_Female01_LILY_rpMS1_posneg_3_Splash	PC	PC 36:5	Analyte	9	H78C44NO8P	NA	-1.21003	7.37854	NA	NA	NA	84.9997	0.024299	8.70083	95.683	1.55178	11.7481
plasma_Female01_LILY_rpMS1_posneg_3_Splash	PC	PC 37:1	Analyte	13.7	C45 H88 O8 N1 P1	NA	NA	NA	NA	NA	NA	84.9997	NA	0.304758	95.683	NA	0.430709
plasma_Female01_LILY_rpMS1_posneg_3_Splash	PC	PC 37:3	Analyte	11.9	H84C45NO8P	NA	NA	NA	NA	NA	NA	NA	NA	NA	95.683	2.31404	1.17615
plasma_Female01_LILY_rpMS1_posneg_3_Splash	PC	PC 37:4	Analyte	11.3	H82C45NO8P	NA	4.95631	2.63305	NA	NA	NA	NA	NA	NA	95.683	-2.19729	3.26114
plasma_Female01_LILY_rpMS1_posneg_3_Splash	PC	PC 37:6	Analyte	8.8	C45H78NO8P	NA	4.26435	0.430797	NA	NA	NA	NA	NA	NA	95.683	1.52533	0.673022
plasma_Female01_LILY_rpMS1_posneg_3_Splash	PC	PC 38:0	Analyte	14.9	C46 H92 O8 N1 P1	NA	NA	NA	NA	NA	NA	NA	NA	NA	95.683	NA	0.126493
plasma_Female01_LILY_rpMS1_posneg_3_Splash	PC	PC 38:1	Analyte	14.1	C46 H90 O8 N1 P1	NA	NA	1.02398	NA	NA	NA	84.9997	NA	0.710518	95.683	NA	0.94225
plasma_Female01_LILY_rpMS1_posneg_3_Splash	PC	PC 38:2	Analyte	13.3	C46 H88 O8 N1 P1	NA	43.0334	7.83723	NA	NA	NA	84.9997	10.8615	3.3732	95.683	30.3611	6.00784
plasma_Female01_LILY_rpMS1_posneg_3_Splash	PC	PC 38:3	Analyte	12.6	H86C46NO8P	NA	1.24375	24.9107	NA	NA	NA	84.9997	-0.454349	19.1899	95.683	1.74967	35.5417
plasma_Female01_LILY_rpMS1_posneg_3_Splash	PC	PC 38:4	ESTD	12.1	H84C46NO8P	NA	0.652788	92.1165	NA	NA	NA	84.9997	-1.08889	66.5645	95.683	0.634849	91.7808
plasma_Female01_LILY_rpMS1_posneg_3_Splash	PC	PC 38:5	Analyte	10.5	H82C46NO8P	NA	-1.78893	20.1814	NA	NA	NA	NA	NA	NA	95.683	-1.0092	24.6563
plasma_Female01_LILY_rpMS1_posneg_3_Splash	PC	PC 38:6	ESTD	9.8	C46H80NO8P	NA	-2.71622	27.1766	NA	NA	NA	84.9997	3.19735	49.8236	95.683	3.80588	54.1103
plasma_Female01_LILY_rpMS1_posneg_3_Splash	PC	PC 40:0	ESTD	15.6	C48 H96 O8 N1 P1	NA	NA	NA	NA	NA	NA	NA	NA	NA	95.683	NA	0.129893
plasma_Female01_LILY_rpMS1_posneg_3_Splash	PC	PC 40:5	Analyte	12.1	C48H86NO8P	NA	2.26795	6.72473	NA	NA	NA	NA	NA	NA	95.683	2.09902	6.78767
plasma_Female01_LILY_rpMS1_posneg_3_Splash	PC	PC 40:6	ESTD	11.7	C48H84NO8P	NA	0.494661	14.952	NA	NA	NA	84.9997	-0.933534	11.5395	95.683	-0.0662809	13.5634
plasma_Female01_LILY_rpMS1_posneg_3_Splash	PC	PC 40:7	Analyte	10	C48H82NO8P	NA	0.615679	2.61118	NA	NA	NA	84.9997	2.30778	3.5845	95.683	3.6026	4.49375
plasma_Female01_LILY_rpMS1_posneg_3_Splash	PC	PC 40:8	Analyte	8.5	C48H80NO8P	NA	3.41764	1.36079	NA	NA	NA	84.9997	1.02078	0.958111	95.683	3.57037	1.40392
plasma_Female01_LILY_rpMS1_posneg_3_Splash	PC	PC O-32:0	Analyte	12.8	C40 H82 O7 N1 P1	NA	13.7766	4.45899	NA	NA	NA	84.9997	2.1253	1.81468	95.683	5.86468	2.42286
plasma_Female01_LILY_rpMS1_posneg_3_Splash	PC	PC O-34:0	Analyte	13.8	C42 H86 O7 N1 P1	NA	NA	NA	NA	NA	NA	NA	NA	NA	95.683	-0.651722	0.256362
plasma_Female01_LILY_rpMS1_posneg_3_Splash	PC	PC P-32:0	Analyte	12.6	C40H80NO7P	NA	NA	NA	NA	NA	NA	NA	NA	NA	95.683	1.59869	1.83309
plasma_Female01_LILY_rpMS1_posneg_3_Splash	PC	PC P-32:1	Analyte	11.4	C40H78NO7P	NA	13.2796	1.54983	NA	NA	NA	NA	NA	NA	95.683	7.00308	0.979093
plasma_Female01_LILY_rpMS1_posneg_3_Splash	PC	PC P-34:0	Analyte	12.8	C42 H84 O7 N1 P1	NA	18.7663	11.0951	NA	NA	NA	84.9997	3.32484	3.80839	95.683	6.2087	5.33243
plasma_Female01_LILY_rpMS1_posneg_3_Splash	PC	PC P-34:1	Analyte	11.8	C42H82NO7P	NA	9.14238	2.83317	NA	NA	NA	NA	NA	NA	95.683	0.78157	2.76329
plasma_Female01_LILY_rpMS1_posneg_3_Splash	PC	PC P-34:2	Analyte	11.6	C42H80NO7P	NA	-1.44488	3.5784	NA	NA	NA	NA	NA	NA	95.683	-1.76715	3.47849
plasma_Female01_LILY_rpMS1_posneg_3_Splash	PC	PC P-36:2	Analyte	11.9	C44H84NO7P	NA	0.292387	3.71198	NA	NA	NA	84.9997	-0.568331	3.16249	95.683	1.43221	4.02533
plasma_Female01_LILY_rpMS1_posneg_3_Splash	PC	PC P-36:3	Analyte	11.6	C44H82NO7P	NA	5.73919	20.246	NA	NA	NA	NA	NA	NA	95.683	-0.135175	11.381
plasma_Female01_LILY_rpMS1_posneg_3_Splash	PC	PC P-38:2	Analyte	13.4	C46 H88 O7 N1 P1	NA	0.620024	1.37577	NA	NA	NA	84.9997	-0.96087	0.830496	95.683	2.31404	1.0267
plasma_Female01_LILY_rpMS1_posneg_3_Splash	PC	PC P-38:4	Analyte	11.7	C46H84NO7P	NA	0.164233	9.29713	NA	NA	NA	84.9997	-1.52541	6.90939	95.683	-0.221941	9.08992
plasma_Female01_LILY_rpMS1_posneg_3_Splash	PC	PC P-38:5	Analyte	11.4	C46H82NO7P	NA	4.26435	6.89874	NA	NA	NA	NA	NA	NA	95.683	1.52533	4.19222
plasma_Female01_LILY_rpMS1_posneg_3_Splash	PC	PC P-38:6	Analyte	10.8	C46 H80 O7 N1 P1	NA	-1.26442	0.569541	NA	NA	NA	84.9997	-0.0242568	0.939266	95.683	-0.0953893	0.884489
plasma_Female01_LILY_rpMS1_posneg_3_Splash	PC	PC P-40:2	Analyte	14.1	C48 H92 O7 N1 P1	NA	NA	NA	NA	NA	NA	NA	NA	NA	95.683	NA	0.445708
plasma_Female01_LILY_rpMS1_posneg_3_Splash	PC	PC P-40:5	Analyte	11.8	C48H86NO7P	NA	NA	NA	NA	NA	NA	NA	NA	NA	95.683	NA	1.28805
plasma_Female01_LILY_rpMS1_posneg_3_Splash	PC	PC P-40:6	Analyte	11.2	C48H84NO7P	NA	-0.129327	0.991514	NA	NA	NA	84.9997	-1.06249	0.787073	95.683	-1.17396	0.772687
plasma_Female01_LILY_rpMS1_posneg_3_Splash	PC	PC P-40:7	Analyte	10.9	C48 H82 O7 N1 P1	NA	NA	0.267947	NA	NA	NA	84.9997	NA	0.349386	95.683	NA	0.357382
plasma_Female01_LILY_rpMS1_posneg_3_Splash	PC	PC P-42:2	Analyte	14.9	C50 H96 O7 N1 P1	NA	NA	NA	NA	NA	NA	NA	NA	NA	95.683	NA	0.675228
plasma_Female01_LILY_rpMS1_posneg_3_Splash	PE	PE 33:1	DeutISTD	11.7	C38H74NO8P	60.2939	NA	2.07615	201.817	NA	6.18025	116.707	NA	3.67692	146.568	NA	4.35874
plasma_Female01_LILY_rpMS1_posneg_3_Splash	PE	PE 34:1	ESTD	12.5	C39H76NO8P	60.2939	4.20324	1.20424	201.817	9.11455	2.03505	116.707	2.72247	1.21863	146.568	2.06938	1.06007
plasma_Female01_LILY_rpMS1_posneg_3_Splash	PE	PE 34:2	Analyte	11.3	H74C39NO8P	60.2939	1.20957	2.09782	201.817	9.41708	4.12421	116.707	-1.16404	1.73251	146.568	-0.827086	1.73832
plasma_Female01_LILY_rpMS1_posneg_3_Splash	PE	PE 34:3	Analyte	10	H72C39NO8P	NA	NA	NA	201.817	NA	0.0380404	NA	NA	NA	146.568	NA	0.128633
plasma_Female01_LILY_rpMS1_posneg_3_Splash	PE	PE 36:1	Analyte	13.6	H80C41NO8P	60.2939	4.19757	2.72608	201.817	1.2121	1.82276	116.707	1.0442	1.73778	146.568	0.602027	1.63119
plasma_Female01_LILY_rpMS1_posneg_3_Splash	PE	PE 36:2	ESTD	12.7	C41H78NO8P	60.2939	0.921812	7.39123	NA	NA	NA	NA	NA	NA	146.568	-1.78449	5.2597
plasma_Female01_LILY_rpMS1_posneg_3_Splash	PE	PE 36:3	Analyte	11.5	H76C41NO8P	60.2939	-2.53369	1.7484	201.817	-2.08803	2.34109	116.707	-3.77346	1.21412	146.568	-2.13159	1.93783
plasma_Female01_LILY_rpMS1_posneg_3_Splash	PE	PE 36:4	Analyte	10	H74C41NO8P	60.2939	-7.37409	0.3301	201.817	-7.05243	0.599129	116.707	-7.37188	0.31956	146.568	-6.96316	0.557288
plasma_Female01_LILY_rpMS1_posneg_3_Splash	PE	PE 38:4	Analyte	12.5	C43H78NO8P	60.2939	1.47646	9.11176	201.817	8.34553	17.4371	116.707	-1.66129	5.88735	146.568	-0.66002	6.68042
plasma_Female01_LILY_rpMS1_posneg_3_Splash	PE	PE 38:5	Analyte	11.2	C43 H76 O8 N1 P1	60.2939	-3.23969	0.506678	201.817	5.47951	3.35723	116.707	-0.407114	1.62985	146.568	-2.95577	0.513961
plasma_Female01_LILY_rpMS1_posneg_3_Splash	PE	PE 38:6	Analyte	10.5	C43H74NO8P	60.2939	-1.38928	1.64304	201.817	3.19762	3.61549	116.707	-2.44232	1.37647	146.568	-1.46111	1.78096
plasma_Female01_LILY_rpMS1_posneg_3_Splash	PE	PE 40:6	Analyte	12.1	C45H78NO8P	60.2939	0.985974	1.36129	201.817	4.94146	2.72601	116.707	-0.9254	1.15686	146.568	-0.620412	1.06594
plasma_Female01_LILY_rpMS1_posneg_3_Splash	PE	PE P-34:1	Analyte	13.2	C39 H76 O7 N1 P1	60.2939	4.61522	2.83217	201.817	1.42058	1.23656	116.707	1.85883	1.26826	146.568	1.42653	1.68656
plasma_Female01_LILY_rpMS1_posneg_3_Splash	PE	PE P-36:1	Analyte	14.1	C41H80NO7P	60.2939	1.67915	1.50175	201.817	0.414734	1.12275	116.707	0.753614	1.1771	146.568	-0.208772	0.99229
plasma_Female01_LILY_rpMS1_posneg_3_Splash	PE	PE P-36:2	Analyte	13.4	C41H78NO7P	60.2939	6.54063	7.81022	201.817	3.08047	4.65672	116.707	1.9429	3.98818	146.568	1.26077	3.99422
plasma_Female01_LILY_rpMS1_posneg_3_Splash	PE	PE P-36:3	Analyte	12.2	C41 H76 O7 N1 P1	60.2939	2.21729	3.67968	201.817	8.58735	7.02453	116.707	0.0297389	2.51465	146.568	0.0560675	2.43667
plasma_Female01_LILY_rpMS1_posneg_3_Splash	PE	PE P-36:4	Analyte	11.9	C41H74NO7P	60.2939	-1.57913	4.55775	201.817	5.21971	33.8123	116.707	0.0741825	11.4453	146.568	-1.46982	5.75059
plasma_Female01_LILY_rpMS1_posneg_3_Splash	PE	PE P-36:5	Analyte	10.8	C41 H72 O7 N1 P1	60.2939	NA	0.283306	201.817	NA	0.403724	116.707	NA	0.473525	146.568	NA	0.441428
plasma_Female01_LILY_rpMS1_posneg_3_Splash	PE	PE P-38:3	Analyte	13.3	C43 H80 O7 N1 P1	60.2939	5.15569	2.2591	NA	NA	NA	NA	NA	NA	146.568	1.35237	1.38751
plasma_Female01_LILY_rpMS1_posneg_3_Splash	PE	PE P-38:4	Analyte	13.2	C43H78NO7P	60.2939	12.207	50.105	201.817	4.82511	21.214	116.707	3.27051	16.8759	146.568	4.19781	23.5043
plasma_Female01_LILY_rpMS1_posneg_3_Splash	PE	PE P-38:5	Analyte	12	C43H76NO7P	60.2939	3.25791	14.6664	201.817	9.35699	25.5289	116.707	2.12973	11.3612	146.568	0.862217	9.7675
plasma_Female01_LILY_rpMS1_posneg_3_Splash	PE	PE P-38:6	Analyte	11.4	C43 H74 O7 N1 P1	60.2939	-0.478919	4.33488	201.817	0.508764	6.15287	116.707	-1.53413	2.62914	146.568	0.0936123	5.28921
plasma_Female01_LILY_rpMS1_posneg_3_Splash	PE	PE P-40:4	Analyte	14.2	C45 H82 O7 N1 P1	60.2939	-2.64976	0.533925	201.817	-0.600943	2.05146	116.707	-0.634704	0.866414	146.568	-0.0728426	0.902215
plasma_Female01_LILY_rpMS1_posneg_3_Splash	PE	PE P-40:5	Analyte	13.2	C45H80NO7P	60.2939	3.19237	3.29914	201.817	-0.464288	1.57295	116.707	-0.31036	1.53769	146.568	0.333671	1.93024
plasma_Female01_LILY_rpMS1_posneg_3_Splash	PE	PE P-40:6	Analyte	12.8	C45H78NO7P	60.2939	0.120749	3.09355	201.817	3.8999	6.49698	116.707	-0.702314	2.35475	146.568	-0.944011	2.10606
plasma_Female01_LILY_rpMS1_posneg_3_Splash	PE	PE P-40:7	Analyte	11.5	C45H76NO7P	60.2939	NA	1.01935	NA	NA	NA	NA	NA	NA	146.568	NA	1.12669
plasma_Female01_LILY_rpMS1_posneg_3_Splash	PI	PI 33:1	DeutISTD	9.5	C42H79O13P	NA	NA	NA	NA	NA	NA	NA	NA	NA	59.8528	NA	2.61174
plasma_Female01_LILY_rpMS1_posneg_3_Splash	PI	PI 34:1	ESTD	10.6	H81C43O13P	NA	NA	NA	NA	NA	NA	114.565	0.636114	1.3459	59.8528	-0.298149	1.09332
plasma_Female01_LILY_rpMS1_posneg_3_Splash	PI	PI 34:2	Analyte	9	C43H79O13P	NA	NA	NA	NA	NA	NA	114.565	-1.74152	1.74434	59.8528	-2.30534	1.6949
plasma_Female01_LILY_rpMS1_posneg_3_Splash	PI	PI 36:1	Analyte	12.1	H85C45O13P	NA	NA	NA	NA	NA	NA	114.565	1.37009	1.85849	59.8528	6.34393	2.82185
plasma_Female01_LILY_rpMS1_posneg_3_Splash	PI	PI 36:2	Analyte	11	H83C45O13P	NA	NA	NA	NA	NA	NA	114.565	5.43685	7.07077	59.8528	10.8727	6.73599
plasma_Female01_LILY_rpMS1_posneg_3_Splash	PI	PI 36:4	Analyte	8.7	H79C45O13P	NA	NA	NA	NA	NA	NA	114.565	-1.80887	2.12611	59.8528	-1.07043	2.60213
plasma_Female01_LILY_rpMS1_posneg_3_Splash	PI	PI 38:3	Analyte	11.4	C47H85O13P	NA	NA	NA	NA	NA	NA	114.565	-0.928719	2.46711	59.8528	35.5475	11.4191
plasma_Female01_LILY_rpMS1_posneg_3_Splash	PI	PI 38:4	Analyte	10.7	C47H83O13P	NA	NA	NA	NA	NA	NA	114.565	12.3831	39.6732	59.8528	19.8118	36.3828
plasma_Female01_LILY_rpMS1_posneg_3_Splash	PI	PI 38:5	Analyte	8.9	C47H81O13P	NA	NA	NA	NA	NA	NA	NA	NA	NA	59.8528	-1.97982	1.01444
plasma_Female01_LILY_rpMS1_posneg_3_Splash	PI	PI 40:6	Analyte	10.1	C49H83O13P	NA	NA	NA	NA	NA	NA	NA	NA	NA	59.8528	2.12778	0.875127
plasma_Female01_LILY_rpMS1_posneg_3_Splash	PS	PS 33:1	DeutISTD	10	C39H74NO10P	NA	NA	NA	NA	NA	NA	NA	NA	NA	46.9951	NA	1.05219
plasma_Female01_LILY_rpMS1_posneg_3_Splash	TG	TG 40:0	Analyte	16.3	C43H82O6	NA	NA	NA	NA	NA	NA	NA	NA	NA	186.613	NA	0.157732
plasma_Female01_LILY_rpMS1_posneg_3_Splash	TG	TG 42:1	Analyte	16.3	C45H84O6	NA	NA	NA	NA	NA	NA	NA	NA	NA	186.613	NA	0.177809
plasma_Female01_LILY_rpMS1_posneg_3_Splash	TG	TG 44:0	Analyte	16.9	C47H90O6	NA	NA	NA	NA	NA	NA	NA	NA	NA	186.613	NA	0.497152
plasma_Female01_LILY_rpMS1_posneg_3_Splash	TG	TG 44:1	Analyte	16.6	C47H88O6	NA	NA	NA	NA	NA	NA	NA	NA	NA	186.613	NA	0.345924
plasma_Female01_LILY_rpMS1_posneg_3_Splash	TG	TG 44:2	Analyte	16.4	C47H86O6	NA	NA	NA	NA	NA	NA	NA	NA	NA	186.613	NA	0.301379
plasma_Female01_LILY_rpMS1_posneg_3_Splash	TG	TG 46:0	Analyte	17.1	C49H94O6	NA	NA	NA	NA	NA	NA	NA	NA	NA	186.613	NA	0.606615
plasma_Female01_LILY_rpMS1_posneg_3_Splash	TG	TG 46:1	Analyte	16.9	C49H92O6	42.3543	NA	0.848142	NA	NA	NA	NA	NA	NA	186.613	NA	1.69434
plasma_Female01_LILY_rpMS1_posneg_3_Splash	TG	TG 46:2	Analyte	16.7	C49H90O6	42.3543	-1.33116	0.872924	NA	NA	NA	NA	NA	NA	186.613	0.434666	1.75142
plasma_Female01_LILY_rpMS1_posneg_3_Splash	TG	TG 46:3	Analyte	16.4	C49H88O6	NA	NA	NA	NA	NA	NA	NA	NA	NA	186.613	NA	0.437296
plasma_Female01_LILY_rpMS1_posneg_3_Splash	TG	TG 48:0	ESTD	17.3	C51H98O6	42.3543	0.071354	1.12402	NA	NA	NA	NA	NA	NA	186.613	6.2825	2.32979
plasma_Female01_LILY_rpMS1_posneg_3_Splash	TG	TG 48:1	Analyte	17.1	H96C51O6	42.3543	-0.773831	2.23783	NA	NA	NA	NA	NA	NA	186.613	6.5691	4.65283
plasma_Female01_LILY_rpMS1_posneg_3_Splash	TG	TG 48:1	DeutISTD	17.1	C51H96O6	NA	NA	NA	NA	NA	NA	NA	NA	NA	186.613	6.5691	61.878
plasma_Female01_LILY_rpMS1_posneg_3_Splash	TG	TG 48:2	Analyte	16.9	H94C51O6	42.3543	-2.04638	2.98135	NA	NA	NA	NA	NA	NA	186.613	12.9309	7.15872
plasma_Female01_LILY_rpMS1_posneg_3_Splash	TG	TG 48:3	ESTD	16.7	C51H92O6	42.3543	NA	1.6739	NA	NA	NA	NA	NA	NA	186.613	NA	2.8306
plasma_Female01_LILY_rpMS1_posneg_3_Splash	TG	TG 48:4	Analyte	16.4	H90C51O6	42.3543	-2.43085	0.799649	NA	NA	NA	NA	NA	NA	186.613	-0.594309	1.11293
plasma_Female01_LILY_rpMS1_posneg_3_Splash	TG	TG 49:3	Analyte	16.8	C52 H94 O6	NA	NA	NA	NA	NA	NA	NA	NA	NA	186.613	NA	0.615868
plasma_Female01_LILY_rpMS1_posneg_3_Splash	TG	TG 50:0	Analyte	17.5	C53H102O6	42.3543	-0.295207	0.633226	NA	NA	NA	NA	NA	NA	186.613	11.3065	2.07197
plasma_Female01_LILY_rpMS1_posneg_3_Splash	TG	TG 50:1	Analyte	17.3	H100C53O6	42.3543	-0.856464	10.168	NA	NA	NA	NA	NA	NA	186.613	11.5672	35.1321
plasma_Female01_LILY_rpMS1_posneg_3_Splash	TG	TG 50:2	Analyte	17.1	H98C53O6	42.3543	-0.808073	13.6673	NA	NA	NA	NA	NA	NA	186.613	11.7787	52.0812
plasma_Female01_LILY_rpMS1_posneg_3_Splash	TG	TG 50:3	Analyte	16.9	H96C53O6	42.3543	0.292573	10.3856	NA	NA	NA	NA	NA	NA	186.613	12.7288	35.5678
plasma_Female01_LILY_rpMS1_posneg_3_Splash	TG	TG 50:4	Analyte	16.7	H94C53O6	42.3543	-0.500307	4.03849	NA	NA	NA	NA	NA	NA	186.613	1.03589	6.49044
plasma_Female01_LILY_rpMS1_posneg_3_Splash	TG	TG 50:5	Analyte	16.5	H92C53O6	42.3543	-0.597264	0.730621	NA	NA	NA	NA	NA	NA	186.613	3.07293	2.3791
plasma_Female01_LILY_rpMS1_posneg_3_Splash	TG	TG 51:3	Analyte	17	H98C54O6	42.3543	-0.7724	2.05986	NA	NA	NA	NA	NA	NA	186.613	0.185746	3.34665
plasma_Female01_LILY_rpMS1_posneg_3_Splash	TG	TG 52:1	Analyte	17.5	C55H104O6	42.3543	0.446935	4.03175	NA	NA	NA	NA	NA	NA	186.613	1.97994	6.9588
plasma_Female01_LILY_rpMS1_posneg_3_Splash	TG	TG 52:2	Analyte	17.3	H102C55O6	42.3543	1.92628	27.4261	NA	NA	NA	NA	NA	NA	186.613	9.25514	66.6939
plasma_Female01_LILY_rpMS1_posneg_3_Splash	TG	TG 52:3	Analyte	17.1	H100C55O6	42.3543	-0.394672	51.7778	NA	NA	NA	NA	NA	NA	186.613	3.55636	118.879
plasma_Female01_LILY_rpMS1_posneg_3_Splash	TG	TG 52:4	Analyte	16.9	H98C55O6	42.3543	-0.373819	33.9785	NA	NA	NA	NA	NA	NA	186.613	7.59538	133.024
plasma_Female01_LILY_rpMS1_posneg_3_Splash	TG	TG 52:5	Analyte	16.8	H96C55O6	42.3543	-0.651199	8.60142	NA	NA	NA	NA	NA	NA	186.613	3.23246	25.0963
plasma_Female01_LILY_rpMS1_posneg_3_Splash	TG	TG 52:6	Analyte	16.6	H94C55O6	42.3543	-1.46065	1.26558	NA	NA	NA	NA	NA	NA	186.613	0.777666	3.83704
plasma_Female01_LILY_rpMS1_posneg_3_Splash	TG	TG 52:7	Analyte	16.4	H92C55O6	42.3543	-0.970963	0.198857	NA	NA	NA	NA	NA	NA	186.613	4.08732	0.745571
plasma_Female01_LILY_rpMS1_posneg_3_Splash	TG	TG 52:8	Analyte	16.2	H90C55O6	42.3543	NA	0.0331429	NA	NA	NA	NA	NA	NA	186.613	NA	0.297749
plasma_Female01_LILY_rpMS1_posneg_3_Splash	TG	TG 53:3	Analyte	17.2	H102C56O6	42.3543	-2.10234	0.980468	NA	NA	NA	NA	NA	NA	186.613	1.28258	3.83915
plasma_Female01_LILY_rpMS1_posneg_3_Splash	TG	TG 54:2	Analyte	17.5	H106C57O6	42.3543	-0.694897	3.1141	NA	NA	NA	NA	NA	NA	186.613	3.83101	9.12719
plasma_Female01_LILY_rpMS1_posneg_3_Splash	TG	TG 54:3	ESTD	17.3	C57H104O6	42.3543	-0.082833	12.9201	NA	NA	NA	NA	NA	NA	186.613	3.87911	31.1144
plasma_Female01_LILY_rpMS1_posneg_3_Splash	TG	TG 54:4	Analyte	17.1	H102C57O6	42.3543	-0.445914	21.7265	NA	NA	NA	NA	NA	NA	186.613	4.98031	56.4195
plasma_Female01_LILY_rpMS1_posneg_3_Splash	TG	TG 54:5	Analyte	16.9	H100C57O6	42.3543	0.177039	25.3834	NA	NA	NA	NA	NA	NA	186.613	10.0364	118.699
plasma_Female01_LILY_rpMS1_posneg_3_Splash	TG	TG 54:6	ESTD	16.8	C57H98O6	42.3543	-0.3399	13.2059	NA	NA	NA	NA	NA	NA	186.613	3.63039	35.1067
plasma_Female01_LILY_rpMS1_posneg_3_Splash	TG	TG 54:7	Analyte	16.6	H96C57O6	42.3543	-1.57158	3.45734	NA	NA	NA	NA	NA	NA	186.613	1.08226	7.60397
plasma_Female01_LILY_rpMS1_posneg_3_Splash	TG	TG 54:9	ESTD	16.1	C57H92O6	NA	NA	NA	NA	NA	NA	NA	NA	NA	186.613	NA	0.247274
plasma_Female01_LILY_rpMS1_posneg_3_Splash	TG	TG 56:7	Analyte	16.9	C59H100O6	42.3543	-1.94604	7.45898	NA	NA	NA	NA	NA	NA	186.613	43.2609	80.339
plasma_Female01_LILY_rpMS1_posneg_3_Splash	TG	TG 56:8	Analyte	16.7	C59H98O6	42.3543	NA	4.53365	NA	NA	NA	NA	NA	NA	186.613	NA	40.1043
plasma_Female01_LILY_rpMS1_posneg_3_Splash	TG	TG 56:9	Analyte	16.5	C59H96O6	42.3543	6.44404	3.35579	NA	NA	NA	NA	NA	NA	186.613	5.30088	2.8596
plasma_Female01_LILY_rpMS1_posneg_3_Splash	TG	TG 58:6	Analyte	17.2	C61 H106 O6	42.3543	NA	0.693837	NA	NA	NA	NA	NA	NA	186.613	NA	1.13948
plasma_Female01_LILY_rpMS1_posneg_3_Splash	TG	TG 58:7	Analyte	17	C61H104O6	42.3543	-1.06019	1.24994	NA	NA	NA	NA	NA	NA	186.613	34.6813	12.2781
plasma_Female01_LILY_rpMS1_posneg_3_Splash	TG	TG 58:8	Analyte	17	C61 H102 O6	42.3543	4.91701	1.93526	NA	NA	NA	NA	NA	NA	186.613	122.413	17.959
plasma_Female01_LILY_rpMS1_posneg_3_Splash	TG	TG 58:9	Analyte	16.8	C61 H100 O6	42.3543	0.898874	1.99685	NA	NA	NA	NA	NA	NA	186.613	12.4022	5.80591
plasma_Female01_LILY_rpMS1_posneg_3_Splash	TG	TG 60:10	Analyte	16.8	C63 H102 O6	42.3543	NA	0.353961	NA	NA	NA	NA	NA	NA	186.613	NA	1.27443
plasma_Female01_LILY_rpMS1_posneg_3_Splash	TG	TG 60:9	Analyte	17	C63 H104 O6	42.3543	NA	0.22467	NA	NA	NA	NA	NA	NA	186.613	NA	0.900369
plasma_Female01_LILY_rpMS1_posneg_3_Splash	SE	ZE 18:2	Analyte	17.6	H74 C45 O2	NA	NA	NA	NA	NA	NA	NA	NA	NA	25.2481	NA	183.273
plasma_Female02_LILY_rpMS1_posneg_1_Splash	SE	CE 16:0	ESTD	18.2	C43H76O2	NA	NA	NA	NA	NA	NA	NA	NA	NA	25.2481	3.55126	502.584
plasma_Female02_LILY_rpMS1_posneg_1_Splash	SE	CE 17:0	Analyte	18.4	C44 H78 O2	NA	NA	NA	NA	NA	NA	NA	NA	NA	25.2481	NA	12.3424
plasma_Female02_LILY_rpMS1_posneg_1_Splash	SE	CE 18:1	Analyte	18.1	C45 H78 O2	NA	NA	NA	NA	NA	NA	NA	NA	NA	25.2481	-2.99293	80.072
plasma_Female02_LILY_rpMS1_posneg_1_Splash	SE	CE 18:1	DeutISTD	18.1	C45H78O2	NA	NA	NA	NA	NA	NA	NA	NA	NA	25.2481	-2.99293	39.8065
plasma_Female02_LILY_rpMS1_posneg_1_Splash	SE	CE 18:2	ESTD	17.9	C45H76O2	NA	NA	NA	NA	NA	NA	NA	NA	NA	25.2481	-1.13607	1024.89
plasma_Female02_LILY_rpMS1_posneg_1_Splash	SE	CE 18:3	Analyte	17.6	C45 H74 O2	NA	NA	NA	NA	NA	NA	NA	NA	NA	25.2481	0.000105709	42.2837
plasma_Female02_LILY_rpMS1_posneg_1_Splash	SE	CE 20:3	Analyte	17.9	C47 H78 O2	NA	NA	NA	NA	NA	NA	NA	NA	NA	25.2481	-0.455039	10.8085
plasma_Female02_LILY_rpMS1_posneg_1_Splash	SE	CE 20:4	Analyte	17.7	C47 H76 O2	NA	NA	NA	NA	NA	NA	NA	NA	NA	25.2481	2.06418	383.509
plasma_Female02_LILY_rpMS1_posneg_1_Splash	SE	CE 20:5	Analyte	17.4	C47 H74 O2	NA	NA	NA	NA	NA	NA	NA	NA	NA	25.2481	3.84231	48.3233
plasma_Female02_LILY_rpMS1_posneg_1_Splash	SE	CE 22:6	Analyte	17.5	C49 H76 O2	NA	NA	NA	NA	NA	NA	NA	NA	NA	25.2481	2.82711	58.5326
plasma_Female02_LILY_rpMS1_posneg_1_Splash	Co	Co Q10	ESTD	16.8	C59H90O4	NA	NA	NA	NA	NA	NA	NA	NA	NA	NA	NA	1.11062
plasma_Female02_LILY_rpMS1_posneg_1_Splash	Co	Co Q9	Analyte	16.3	C54 H82 O4	NA	NA	NA	NA	NA	NA	NA	NA	NA	NA	NA	0.0624226
plasma_Female02_LILY_rpMS1_posneg_1_Splash	DG	DG 30:0	Analyte	13.4	C33 H64 O5	NA	NA	NA	NA	NA	NA	NA	NA	NA	81.5706	-2.07379	0.351718
plasma_Female02_LILY_rpMS1_posneg_1_Splash	DG	DG 32:0	ESTD	14.4	C35H68O5	41.4932	-1.37416	0.504041	NA	NA	NA	NA	NA	NA	81.5706	-0.983759	0.908324
plasma_Female02_LILY_rpMS1_posneg_1_Splash	DG	DG 32:2	Analyte	12.5	H64C35O5	NA	NA	NA	NA	NA	NA	NA	NA	NA	81.5706	NA	0.322632
plasma_Female02_LILY_rpMS1_posneg_1_Splash	DG	DG 33:1	Analyte	14	C36 H68 O5	NA	NA	NA	NA	NA	NA	NA	NA	NA	81.5706	NA	0.385872
plasma_Female02_LILY_rpMS1_posneg_1_Splash	DG	DG 34:1	ESTD	14.4	C37H70O5	41.4932	-1.03827	2.04661	NA	NA	NA	NA	NA	NA	81.5706	-0.431748	2.90579
plasma_Female02_LILY_rpMS1_posneg_1_Splash	DG	DG 34:2	Analyte	13.7	H68C37O5	41.4932	NA	1.23538	NA	NA	NA	NA	NA	NA	81.5706	NA	1.79643
plasma_Female02_LILY_rpMS1_posneg_1_Splash	DG	DG 34:3	Analyte	12.6	H66C37O5	41.4932	NA	0.362036	NA	NA	NA	NA	NA	NA	81.5706	NA	0.743282
plasma_Female02_LILY_rpMS1_posneg_1_Splash	DG	DG 36:0	Analyte	15.8	C39H76O5	41.4932	NA	1.15777	NA	NA	NA	NA	NA	NA	81.5706	NA	1.72497
plasma_Female02_LILY_rpMS1_posneg_1_Splash	DG	DG 36:1	Analyte	15.2	H74C39O5	NA	NA	NA	NA	NA	NA	NA	NA	NA	81.5706	NA	0.830944
plasma_Female02_LILY_rpMS1_posneg_1_Splash	DG	DG 36:2	ESTD	14.5	C39H72O5	41.4932	-1.52589	3.25106	NA	NA	NA	NA	NA	NA	81.5706	-0.511262	5.69513
plasma_Female02_LILY_rpMS1_posneg_1_Splash	DG	DG 36:3	Analyte	13.7	H70C39O5	41.4932	-1.61365	4.65874	NA	NA	NA	NA	NA	NA	81.5706	-0.958183	7.6495
plasma_Female02_LILY_rpMS1_posneg_1_Splash	DG	DG 36:4	Analyte	12.8	H68C39O5	41.4932	-1.54125	2.59929	NA	NA	NA	NA	NA	NA	81.5706	-0.93735	3.66083
plasma_Female02_LILY_rpMS1_posneg_1_Splash	DG	DG 36:5	Analyte	11.9	H66C39O5	NA	NA	NA	NA	NA	NA	NA	NA	NA	81.5706	NA	0.42433
plasma_Female02_LILY_rpMS1_posneg_1_Splash	DG	DG 38:2	Analyte	15.2	C41 H76 O5	NA	NA	NA	NA	NA	NA	NA	NA	NA	81.5706	NA	0.317656
plasma_Female02_LILY_rpMS1_posneg_1_Splash	DG	DG 38:3	Analyte	14.6	C41 H74 O5	NA	NA	NA	NA	NA	NA	NA	NA	NA	81.5706	NA	0.402754
plasma_Female02_LILY_rpMS1_posneg_1_Splash	DG	DG 38:4	ESTD	14.4	C41H72O5	NA	NA	NA	NA	NA	NA	NA	NA	NA	81.5706	NA	0.37
plasma_Female02_LILY_rpMS1_posneg_1_Splash	DG	DG 38:6	Analyte	12.5	C41 H68 O5	41.4932	NA	0.571369	NA	NA	NA	NA	NA	NA	81.5706	NA	0.94173
plasma_Female02_LILY_rpMS1_posneg_1_Splash	SE	EE 18:0	Analyte	18	H78 C46 O2	NA	NA	NA	NA	NA	NA	NA	NA	NA	25.2481	NA	181.828
plasma_Female02_LILY_rpMS1_posneg_1_Splash	HexCer	HexCer 40:1;2	Analyte	14.6	C46H89NO8	NA	NA	NA	NA	NA	NA	NA	NA	NA	NA	-2.19015	1.08058
plasma_Female02_LILY_rpMS1_posneg_1_Splash	HexCer	HexCer 42:1;2	Analyte	15.3	C48H93NO8	NA	NA	NA	NA	NA	NA	NA	NA	NA	NA	-1.97527	1.29513
plasma_Female02_LILY_rpMS1_posneg_1_Splash	HexCer	HexCer 42:2;2	ESTD	14.5	C48 H91 O8 N1	NA	NA	NA	NA	NA	NA	NA	NA	NA	NA	NA	0.78546
plasma_Female02_LILY_rpMS1_posneg_1_Splash	LPC	LPC 22:4	Analyte	2.7	C30H54NO7P	NA	NA	NA	NA	NA	NA	NA	NA	NA	65.7659	5.30789	0.193645
plasma_Female02_LILY_rpMS1_posneg_1_Splash	LPE	LPE 18:0	ESTD	3.8	H48C23NO7P	NA	NA	NA	NA	NA	NA	107.506	0.708065	2.03751	100.734	0.827119	2.03964
plasma_Female02_LILY_rpMS1_posneg_1_Splash	LPE	LPE 18:1	DeutISTD	3	C23H46NO7P	NA	NA	NA	NA	NA	NA	107.506	1.36616	4.46633	100.734	NA	4.2742
plasma_Female02_LILY_rpMS1_posneg_1_Splash	LPE	LPE 18:2	Analyte	2.5	H44C23NO7P	NA	NA	NA	NA	NA	NA	107.506	2.9838	4.91486	100.734	3.83293	5.74386
plasma_Female02_LILY_rpMS1_posneg_1_Splash	PC	PC 30:0	Analyte	10.1	C38H76NO8P	NA	0.0074994	0.918825	NA	NA	NA	84.9997	-0.226819	1.03293	95.683	0.461465	1.13195
plasma_Female02_LILY_rpMS1_posneg_1_Splash	PC	PC 31:0	Analyte	11.1	C39H78NO8P	NA	13.7766	1.40554	NA	NA	NA	NA	NA	NA	95.683	5.86468	0.909224
plasma_Female02_LILY_rpMS1_posneg_1_Splash	PC	PC 32:0	ESTD	11.9	C40H80NO8P	NA	4.84221	12.0268	NA	NA	NA	84.9997	-1.82125	5.05088	95.683	-1.31431	5.49492
plasma_Female02_LILY_rpMS1_posneg_1_Splash	PC	PC 32:1	Analyte	10.3	H78C40NO8P	NA	-0.0199914	3.8703	NA	NA	NA	84.9997	-1.41756	3.72883	95.683	0.174428	4.01485
plasma_Female02_LILY_rpMS1_posneg_1_Splash	PC	PC 32:2	Analyte	8.7	H76C40NO8P	NA	0.607864	3.34872	NA	NA	NA	84.9997	-1.98542	1.81703	95.683	-0.658421	2.72944
plasma_Female02_LILY_rpMS1_posneg_1_Splash	PC	PC 33:0	Analyte	12.3	C41 H82 O8 N1 P1	NA	NA	NA	NA	NA	NA	NA	NA	NA	95.683	-0.651722	0.293179
plasma_Female02_LILY_rpMS1_posneg_1_Splash	PC	PC 33:1	Analyte	11.2	H80C41NO8P	NA	18.7663	5.45217	NA	NA	NA	84.9997	3.32484	2.64587	95.683	6.2087	2.87297
plasma_Female02_LILY_rpMS1_posneg_1_Splash	PC	PC 33:2	Analyte	9.7	H78C41NO8P	NA	9.14238	26.9248	NA	NA	NA	84.9997	-0.202048	5.63737	95.683	0.78157	6.4657
plasma_Female02_LILY_rpMS1_posneg_1_Splash	PC	PC 34:0	ESTD	13.1	C42 H84 O8 N1 P1	NA	12.1794	6.06683	NA	NA	NA	84.9997	2.73633	3.38066	95.683	3.47542	3.14393
plasma_Female02_LILY_rpMS1_posneg_1_Splash	PC	PC 34:1	ESTD	12	C42H82NO8P	NA	-1.40658	58.7143	NA	NA	NA	84.9997	-2.12067	49.4583	95.683	-1.78146	53.682
plasma_Female02_LILY_rpMS1_posneg_1_Splash	PC	PC 34:2	ESTD	10.7	C42H80NO8P	NA	-0.55428	266.125	NA	NA	NA	84.9997	0.730053	331.968	95.683	0.648908	336.456
plasma_Female02_LILY_rpMS1_posneg_1_Splash	PC	PC 34:3	Analyte	9.2	H78C42NO8P	NA	-3.22977	5.89312	NA	NA	NA	84.9997	-2.49798	7.0935	95.683	-2.01714	7.81638
plasma_Female02_LILY_rpMS1_posneg_1_Splash	PC	PC 34:4	Analyte	8.4	H76C42NO8P	NA	0.0455125	1.18732	NA	NA	NA	84.9997	0.932281	1.27604	95.683	3.79822	2.30004
plasma_Female02_LILY_rpMS1_posneg_1_Splash	PC	PC 34:5	Analyte	7.1	H74C42NO8P	NA	NA	NA	NA	NA	NA	NA	NA	NA	95.683	85.6806	0.436497
plasma_Female02_LILY_rpMS1_posneg_1_Splash	PC	PC 35:0	Analyte	13.6	C43 H86 O8 N1 P1	NA	NA	NA	NA	NA	NA	NA	NA	NA	95.683	NA	0.132013
plasma_Female02_LILY_rpMS1_posneg_1_Splash	PC	PC 35:1	Analyte	12.5	H84C43NO8P	NA	-3.07828	0.344042	NA	NA	NA	84.9997	-2.99678	0.43663	95.683	-2.92816	0.491578
plasma_Female02_LILY_rpMS1_posneg_1_Splash	PC	PC 35:2	Analyte	11.4	H82C43NO8P	NA	-1.42987	6.54813	NA	NA	NA	84.9997	-0.919959	4.53901	95.683	-2.52083	3.95688
plasma_Female02_LILY_rpMS1_posneg_1_Splash	PC	PC 35:3	Analyte	9.9	H80C43NO8P	NA	0.292387	0.404782	NA	NA	NA	NA	NA	NA	95.683	1.43221	1.01556
plasma_Female02_LILY_rpMS1_posneg_1_Splash	PC	PC 35:4	Analyte	9.4	H78C43NO8P	NA	5.73919	2.59025	NA	NA	NA	84.9997	1.05188	1.44834	95.683	-0.135175	2.40555
plasma_Female02_LILY_rpMS1_posneg_1_Splash	PC	PC 35:5	Analyte	8	H76C43NO8P	NA	NA	NA	NA	NA	NA	NA	NA	NA	95.683	-4.06069	0.430627
plasma_Female02_LILY_rpMS1_posneg_1_Splash	PC	PC 36:1	ESTD	13.2	H86C44NO8P	NA	14.5145	54.4964	NA	NA	NA	84.9997	2.64183	23.3335	95.683	2.93474	23.3236
plasma_Female02_LILY_rpMS1_posneg_1_Splash	PC	PC 36:2	ESTD	12.4	C44H84NO8P	NA	3.24856	240.42	NA	NA	NA	84.9997	1.05921	177.039	95.683	3.66254	252.359
plasma_Female02_LILY_rpMS1_posneg_1_Splash	PC	PC 36:3	Analyte	11.1	H82C44NO8P	NA	-0.982896	72.0377	NA	NA	NA	NA	NA	NA	95.683	0.371101	87.8804
plasma_Female02_LILY_rpMS1_posneg_1_Splash	PC	PC 36:5	Analyte	9	H78C44NO8P	NA	-1.21003	8.6217	NA	NA	NA	84.9997	0.024299	10.7813	95.683	1.55178	13.5095
plasma_Female02_LILY_rpMS1_posneg_1_Splash	PC	PC 37:3	Analyte	11.9	H84C45NO8P	NA	NA	NA	NA	NA	NA	NA	NA	NA	95.683	2.31404	1.12316
plasma_Female02_LILY_rpMS1_posneg_1_Splash	PC	PC 37:4	Analyte	11.3	H82C45NO8P	NA	4.95631	3.33229	NA	NA	NA	NA	NA	NA	95.683	-2.19729	4.11366
plasma_Female02_LILY_rpMS1_posneg_1_Splash	PC	PC 37:6	Analyte	8.8	C45H78NO8P	NA	4.26435	0.862229	NA	NA	NA	84.9997	NA	0.599037	95.683	1.52533	1.02432
plasma_Female02_LILY_rpMS1_posneg_1_Splash	PC	PC 38:2	Analyte	13.3	C46 H88 O8 N1 P1	NA	43.0334	7.43452	NA	NA	NA	84.9997	10.8615	3.3693	95.683	30.3611	5.85157
plasma_Female02_LILY_rpMS1_posneg_1_Splash	PC	PC 38:3	Analyte	12.6	H86C46NO8P	NA	1.24375	15.7678	NA	NA	NA	84.9997	-0.454349	12.3649	95.683	1.74967	20.9578
plasma_Female02_LILY_rpMS1_posneg_1_Splash	PC	PC 38:4	ESTD	12.1	H84C46NO8P	NA	0.652788	99.5417	NA	NA	NA	84.9997	-1.08889	75.7379	95.683	0.634849	99.8205
plasma_Female02_LILY_rpMS1_posneg_1_Splash	PC	PC 38:5	Analyte	10.5	H82C46NO8P	NA	-1.78893	22.7946	NA	NA	NA	NA	NA	NA	95.683	-1.0092	27.8424
plasma_Female02_LILY_rpMS1_posneg_1_Splash	PC	PC 38:6	ESTD	9.8	C46H80NO8P	NA	-2.71622	37.1391	NA	NA	NA	84.9997	3.19735	68.8055	95.683	3.80588	73.4573
plasma_Female02_LILY_rpMS1_posneg_1_Splash	PC	PC 40:0	ESTD	15.6	C48 H96 O8 N1 P1	NA	NA	NA	NA	NA	NA	NA	NA	NA	95.683	NA	0.165591
[truncated: 15,553 more rows]

## Sheet: Figures of Merit
Class	Analyte	Formula_Analyte	Quant_Strategy	Polarity	ISTD	ISTDLevel	ESTD	ESTDLevel	RT_mean_Analyte [min]	RT_mean_ISTD [min]	RT_mean_ESTD [min]	LOQ [nmol/L]	ULOQ [nmol/L]	Recovery_SplashQC [%]	Zscore_LipidQC	Recovery_QC_10000nM [%]	Recovery_QC_1000nM [%]	Recovery_QC_100nM [%]	Recovery_QC_10nM [%]	Area_RSD_QC [%]
LPC	LPC 18:0	C26H54NO7P	RPMultipoint	pos	LPC 18:0	Level1	LPC 18:0	Level1	3.6	3.6	3.6	4.98961	13939.9	65.7659	1.6	47.9267	39.1125	46.4788	110.964	11.2962
LPC	LPC 16:0	C24H50NO7P	RPMultipoint	pos	LPC 16:0	Level1	LPC 16:0	Level1	2.8	2.8	2.8	2.48115	3577.39	65.7659	-0.2	93.8037	93.7031	95.0638	189.742	10.2351
DG	DG 34:1	C37H70O5	RPMultipoint	pos	DG 34:1	Level1	DG 34:1	Level1	14.4	14.4	14.4	17.6851	5000	81.5706	-0.4	105.309	92.9307	93.192	NA	4.71897
DG	DG 36:2	C39H72O5	RPMultipoint	pos	DG 36:2	Level1	DG 36:2	Level1	14.5	14.5	14.5	15.9606	5000	81.5706	-0.5	103.759	97.0171	95.8194	NA	3.5212
Cer	Cer 34:1;2	C34H67NO3	RPMultipoint	neg	Cer 34:1;2	Level1	Cer 34:1;2	Level1	12.6	12.5	12.6	2.53401	5000	NA	3.7	119.798	84.6633	91.3533	104.886	16.4606
Cer	Cer 36:1;2	C36H71NO3	RPMultipoint	neg	Cer 36:1;2	Level1	Cer 36:1;2	Level1	13.7	13.7	13.7	1.44292	750	NA	1.2	138.764	91.146	87.9369	96.222	18.8665
LPE	LPE 18:0	H48C23NO7P	RPMultipoint	neg	LPE 18:0	Level1	LPE 18:0	Level1	3.8	3.8	3.8	18.4946	3712.6	107.506	0.7	93.7352	78.8002	87.076	260.046	4.89386
PC	PC 34:1	C42H82NO8P	RPMultipoint	neg	PC 34:1	Level1	PC 34:1	Level1	12	12	12	20.172	6777.59	84.9997	-2.1	96.9492	98.5245	98.6715	NA	3.27935
PC	PC 34:2	C42H80NO8P	RPMultipoint	neg	PC 34:2	Level1	PC 34:2	Level1	10.7	10.7	10.7	16.4009	2643.29	84.9997	0.7	104.141	103.126	110.045	NA	3.84132
PC	PC 36:1	H86C44NO8P	RPMultipoint	neg	PC 36:1	Level1	PC 36:1	Level1	13.2	13.2	13.2	15.218	10000	84.9997	2.6	113.623	99.3976	94.9432	NA	6.44922
PC	PC 36:2	C44H84NO8P	RPMultipoint	neg	PC 36:2	Level1	PC 36:2	Level1	12.4	12.1	12.4	94.0111	1885.86	84.9997	1.1	97.2527	98.7672	103.379	NA	2.35011
PE	PE 34:1	C39H76NO8P	RPMultipoint	neg	PE 34:1	Level1	PE 34:1	Level1	12.5	12.5	12.5	10.7708	5109.03	116.707	2.7	105.477	96.9021	93.4584	NA	3.43401
PI	PI 34:1	H81C43O13P	RPMultipoint	neg	PI 34:1	Level1	PI 34:1	Level1	10.6	10.6	10.6	7.29756	10883	114.565	0.6	NA	NA	NA	NA	NA
SE	CE 16:0	C43H76O2	RPMultipoint	pos	EE 18:0	Level2	CE 16:0	Level1	18.2	18	18.2	280.36	5000	25.2481	3.6	105.271	76.1316	NA	NA	16.1337
SE	CE 18:2	C45H76O2	RPMultipoint	pos	EE 18:2	Level2	CE 18:2	Level1	17.9	17.6	17.9	164.786	5000	25.2481	-1.1	58.1773	117.69	NA	NA	7.06267
PC	PC 38:6	C46H80NO8P	RPMultipoint	neg	PC 36:4	Level2	PC 38:6	Level1	9.8	9.3	9.8	47.0378	1000	84.9997	3.2	93.6932	93.4978	93.7497	NA	2.93399
PC	PC 32:0	C40H80NO8P	RPMultipoint	neg	PC 34:1	Level2	PC 34:1	Level2	11.9	12	11.9	20.172	6777.59	84.9997	-1.8	37.7341	37.5036	39.2116	NA	1.85323
PC	PC 34:0	C42 H84 O8 N1 P1	RPMultipoint	neg	PC 36:1	Level2	PC 36:1	Level2	13.1	13.2	13.1	15.218	10000	84.9997	2.7	186.548	158.388	181.02	NA	7.45913
PC	PC 38:4	H84C46NO8P	RPMultipoint	neg	PC 36:2	Level2	PC 36:2	Level2	12.1	12.1	12.1	94.0111	1885.86	84.9997	-1.1	69.3076	69.6963	95.7804	NA	1.62285
PC	PC P-36:1	C44H86NO7P	RPMultipoint	neg	PC 36:1	Level2	PC 36:1	Level2	13.1	13.2	13.1	15.218	10000	84.9997	-0.9	NA	NA	NA	NA	NA
TG	TG 54:3	C57H104O6	RPFIAOnepoint	pos	TG 54:3	Level1	TG 54:3	Level1	17.3	17.3	17.3	3	3000	42.3543	-0.1	40.4899	39.43	35.4614	16.0369	8.7487
TG	TG 54:6	C57H98O6	RPFIAOnepoint	pos	TG 54:6	Level1	TG 54:6	Level1	16.8	16.8	16.8	1	750	42.3543	-0.3	40.2139	34.7019	20.5847	NA	7.1396
TG	TG 48:0	C51H98O6	RPFIAOnepoint	pos	TG 50:3	Level2	TG 48:3	Level2	17.3	16.9	17.3	25	1000	42.3543	0.1	16.4535	38.0129	45.274	NA	7.11921
FA	FA 16:0	C16H32O2	RPFIAOnepoint	neg	FA 18:1	Level2	FA 20:1	Level2	5.2	5.3	5.2	75	25000	NA	-1	16.6099	NA	NA	NA	6.85923
PC	PC 40:6	C48H84NO8P	RPMultipoint	neg	PC 36:2	Level2	PC 36:2	Level3	11.7	12.1	11.7	94.0111	1885.86	84.9997	-0.9	59.0284	56.7275	NA	NA	4.47038
Cer	Cer 42:2;2	C42H81NO3	RPMultipoint	neg	Cer 36:1;2	Level3	Cer 36:1;2	Level3	15.4	13.7	15.4	1.44292	750	NA	1.6	147.857	97.125	92.7269	104.742	18.2444
PC	PC 36:0	H88C44NO8P	RPMultipoint	neg	PC 36:1	Level3	PC 36:1	Level3	14.1	13.2	14.1	15.218	10000	84.9997	0	93.1608	87.7253	84.1778	NA	5.15689
SM	SM 36:2;2	C41H81N2O6P	RPonlyESTD	neg	no	no	SM 36:2;2	Level1	10.6	10.6	10.6	10.5701	2806.74	54.0123	-2.4	107.495	100.957	92.429	NA	2.60771
PE	PE 36:2	C41H78NO8P	RPMultipoint	neg	PE 36:2	Level1	PE 36:2	Level1	12.6	12.6	12.7	5.57791	7563.82	116.707	-7	98.3592	92.8424	89.3252	NA	4.00194
DG	DG 32:0	C35H68O5	RPMultipoint	pos	DG 33:1	Level2	DG 34:1	Level2	14.4	14	14.4	14.6024	10000	81.5706	-1	97.4669	86.0239	84.5003	320.16	17.723
TG	TG 42:0	C45H86O6	RPMultipoint	pos	TG 48:2	Level2	TG 48:3	Level2	16.6	16.9	16.6	14.92	10000	186.613	1.7	99.2961	160.361	85.452	NA	8.35171
PG	PG 34:1	C40H77O10P	RPFIAOnepoint	neg	PG 34:1	Level1	PG 34:1	Level1	10.9	11	10.9	1	1000	78.5167	-1.9	118.583	106.223	89.1397	81.2604	7.66464
SE	CE 18:0	C45H80O2	RPMultipoint	pos	EE 18:0	Level3	CE 16:0	Level2	18.6	18	18.6	280.36	5000	25.2481	17.3	103.076	109.852	NA	NA	18.0286
Cer	Cer 42:1;2	C42H83NO3	RPMultipoint	neg	Cer 36:1;2	Level3	Cer 36:1;2	Level3	16	13.7	16	1.44292	750	NA	5.3	128.949	118.149	131.234	125.127	24.9326
ST	Cholesterol	C27H46O	RPFIAOnepoint	pos	Ergosterol	Level3	Cholesterol	Level1	11.5	10.1	11.5	50	1000	NA	-6.9	4.19321	5.56287	NA	NA	5.46233
Hex2Cer	Hex2Cer 34:1;2	C46H87NO13	RPonlyESTD	pos	no	no	Hex2Cer 34:1;2	Level1	10.3	10.3	10.3	23.24	25000	NA	4.3	114.981	90.764	85.6046	NA	4.94881
TG	TG 48:3	C51H92O6	RPMultipoint	pos	TG 48:3	Level1	TG 48:3	Level1	16.7	16.7	16.7	7.54902	5000	186.613	NA	110.259	98.7197	86.4841	127.262	9.1008
TG	TG 54:9	C57H92O6	RPMultipoint	pos	TG 54:9	Level1	TG 54:9	Level1	16.1	16	16.1	8.45412	5000	186.613	NA	107.719	98.5194	95.7525	150.354	4.60769
TG	TG 60:3	C63H116O6	RPMultipoint	pos	TG 60:3	Level1	TG 60:3	Level1	17.9	18	17.9	32.4946	10000	186.613	NA	92.7924	101.831	76.6898	NA	6.98466
PS	PS 36:2	C42H78NO10P	RPMultipoint	neg	PS 36:2	Level1	PS 36:2	Level1	11.3	11.3	11.3	3.81967	25000	NA	NA	113.419	54.5499	53.92	256.862	12.5836
PG	PG 36:2	C42H79O10P	RPMultipoint	neg	PG 36:2	Level1	PG 36:2	Level1	10.3	10.4	10.3	422.823	1000	82.768	NA	227.942	111.334	NA	NA	13.8057
Co	Co Q10	C59H90O4	RPMultipoint	pos	Co Q9	Level2	Co Q10	Level1	16.8	16.3	16.8	3.02337	5000	NA	NA	90.2621	119.605	100.608	116.697	12.868
DG	DG 40:6	C43H72O5	RPMultipoint	pos	DG 36:3	Level2	DG 40:6	Level1	14.1	13.7	14.1	2.93991	5000	81.5706	NA	111.939	92.3783	101.31	104.948	6.27425
HexCer	HexCer 34:1;2	C40H77NO8	RPMultipoint	pos	HexCer 36:2;3	Level2	HexCer 34:1;2	Level1	11.1	11.4	11.1	250.877	10000	NA	NA	108.364	80.8015	NA	NA	7.13971
HexCer	HexCer 36:1;2	C42H81NO8	RPMultipoint	pos	HexCer 36:1;3	Level2	HexCer 36:1;2	Level1	12.6	12.2	12.6	174.115	25000	NA	NA	108.181	107.173	NA	NA	21.4222
SPH	SPH 18:1;2	C18H37NO2	RPMultipoint	pos	SPH 18:0;2	Level2	SPH 18:1;2	Level1	2.4	2.6	2.4	13.6582	1000	NA	NA	225.494	107.498	69.0651	NA	19.9034
TG	TG 54:0	C57H110O6	RPMultipoint	pos	TG 54:1	Level2	TG 54:0	Level1	18	17.7	18	86.0654	1000	186.613	NA	11.5276	16.7538	NA	NA	8.04518
CL	CL 64:4	C73H134O17P2	RPMultipoint	neg	CL 70:6	Level2	CL 64:4	Level1	15.8	16.2	15.8	109.128	5000	NA	NA	108.757	64.9323	NA	NA	16.6534
CL	CL 72:4	C81H150O17P2	RPMultipoint	neg	CL 72:5	Level2	CL 72:4	Level1	16.8	16.6	16.8	213.929	5000	NA	NA	96.4299	87.6932	NA	NA	26.0463
DG	DG 38:4	C41H72O5	RPMultipoint	pos	DG 36:2	Level2	DG 36:2	Level2	14.4	14.5	14.4	15.9606	5000	81.5706	NA	122.066	113.862	118.562	237.327	4.27207
ST	Ergosterol	C28H44O	RPFIAOnepoint	pos	Ergosterol	Level1	Cholesterol	Level2	10.1	10.1	10.1	50	1000	NA	NA	NA	NA	NA	NA	NA
HexCer	HexCer 42:2;2	C48 H91 O8 N1	RPMultipoint	pos	HexCer 37:2;3	Level3	HexCer 42:2;2	Level1	14.5	11.9	14.5	35.4639	5000	NA	NA	100.988	94.2525	85.0485	NA	6.65552
TG	TG 66:3	C69H128O6	RPMultipoint	pos	TG 60:2	Level2	TG 60:3	Level3	18.6	18.2	18.6	155.363	10000	186.613	NA	113.246	94.0458	NA	NA	7.7918
Cer	Cer 42:0;2	C42H85NO3	RPMultipoint	neg	Cer 36:1;2	Level3	Cer 36:1;2	Level3	16.1	13.7	16.1	1.44292	750	NA	NA	190.096	134.503	149.199	150.016	22.5722
PC	PC 40:0	C48 H96 O8 N1 P1	RPMultipoint	neg	PC 36:1	Level3	PC 36:1	Level3	15.5	13.2	15.6	15.218	10000	84.9997	NA	80.8361	81.4967	75.2227	NA	7.27444
FA	FA 20:1	C20H38O2	RPFIAOnepoint	neg	FA 18:1	Level3	FA 20:1	Level1	11.5	5.3	11.5	75	25000	NA	NA	2.63117	10.8818	191.699	2857.32	58.8915
ST	Sitosterol	C29H50O	RPFIAOnepoint	pos	Ergosterol	Level3	Cholesterol	Level2	12.8	10.1	12.8	50	1000	NA	NA	NA	NA	NA	NA	NA
ST	Stigmasterol	C29H48O	RPFIAOnepoint	pos	Ergosterol	Level3	Cholesterol	Level2	12.3	10.1	12.3	50	1000	NA	NA	1.2212	NA	NA	NA	2.43567
FA	FA 18:0	C18H36O2	RPFIAOnepoint	neg	FA 18:1	Level3	FA 20:1	Level2	7	5.3	7	75	25000	NA	NA	23.7969	NA	NA	NA	71.1698
FA	FA 22:0	C22H44O2	RPFIAOnepoint	neg	FA 18:1	Level3	FA 20:1	Level2	11.5	5.3	11.5	75	25000	NA	NA	209.02	313.603	402.926	9474.2	35.5056
AcCa	AcCa 6:0	C13H25NO4	RPonlyESTD	pos	no	no	AcCa 6:0	Level1	1.4	1.4	1.4	75.1655	10000	NA	NA	100.916	107.621	104.542	NA	2.78233
AcCa	AcCa 18:1	C25 H47 O4 N1	RPonlyESTD	pos	no	no	AcCa 18:1	Level1	2.6	2.6	2.6	27.3387	10000	NA	NA	101.575	95.626	87.3029	307.455	4.74684

## Sheet: LILY-lipids_FI
Class	ISTD	Formula_ISTD	Mass_ISTD	ESTD	Formula_ESTD	Mass_ESTD	LOQ [nmol/L]	ULOQ [nmol/L]	RT_mean_ISTD [min]	conc_ISTD [nmol/L]
DG	DG 34:1	H70Ci37O5N0	649.681	DG 34:1	H70C37O5N0	612.557	25	1000	14.4392	48.5028
DG	DG 34:2	H68Ci37O5N0	647.665	DG 36:2	H72C39O5N0	638.572	10	1000	13.6707	102.886
DG	DG 34:3	H66Ci37O5N0	645.65	DG 36:2	H72C39O5N0	638.572	10	1000	12.6104	34.1574
DG	DG 36:1	H74Ci39O5N0	679.719	DG 34:1	H70C37O5N0	612.557	25	1000	15.2356	28.3348
DG	DG 36:2	H72Ci39O5N0	677.703	DG 36:2	H72C39O5N0	638.572	10	1000	14.4931	67.9165
DG	DG 36:3	H70Ci39O5N0	675.688	DG 36:2	H72C39O5N0	638.572	10	1000	13.7419	64.3988
DG	DG 36:4	H68Ci39O5N0	673.672	DG 38:4	H72C41O5N0	662.572	25	1000	12.8438	66.424
HexCer	HexCer 36:2;3	H79Ci42O9N1	784.724	HexCer 42:2;2	H91C48O8N1	810.683	25	1000	11.4221	49.3157
LPC	LPC 18:1	H52Ci26P1O7N1	548.443	LPC 18:0	H54C26P1O7N1	524.372	69.6996	34849.8	2.87957	101.708
LPC	LPC 18:2	H50Ci26P1O7N1	546.428	LPC 18:0	H54C26P1O7N1	524.372	69.6996	34849.8	2.38068	143.955
LPC	LPC 18:3	H48Ci26P1O7N1	544.412	LPC 18:0	H54C26P1O7N1	524.372	69.6996	34849.8	2.08991	141.916
PC	PC 32:1	H78Ci40P1O8N1	772.688	PC 34:1	H82C42P1O8N1	760.586	13.5552	2711.04	10.3505	16.2089
PC	PC 32:2	H76Ci40P1O8N1	770.673	PC 34:2	H80C42P1O8N1	758.57	6.60822	2643.29	8.52735	31.1922
PC	PC 32:3	H74Ci40P1O8N1	768.657	PC 34:2	H80C42P1O8N1	758.57	6.60822	2643.29	7.3647	17.9891
PC	PC 33:1	H80Ci41P1O8N1	787.708	PC 34:1	H82C42P1O8N1	760.586	13.5552	2711.04	11.2518	21.37
PC	PC 33:2	H78Ci41P1O8N1	785.692	PC 34:2	H80C42P1O8N1	758.57	6.60822	2643.29	9.59444	76.1159
PC	PC 33:3	H76Ci41P1O8N1	783.676	PC 34:2	H80C42P1O8N1	758.57	6.60822	2643.29	8.33154	71.8834
PC	PC 34:1	H82Ci42P1O8N1	802.727	PC 34:1	H82C42P1O8N1	760.586	13.5552	2711.04	11.9963	24.6464
PC	PC 34:2	H80Ci42P1O8N1	800.711	PC 34:2	H80C42P1O8N1	758.57	6.60822	2643.29	10.7346	200.904
PC	PC 34:3	H78Ci42P1O8N1	798.695	PC 34:2	H80C42P1O8N1	758.57	6.60822	2643.29	9.30356	435.267
PC	PC 34:4	H76Ci42P1O8N1	796.68	PC 36:4	H80C44P1O8N1	782.57	2	20000	7.56726	250.708
PC	PC 34:5	H74Ci42P1O8N1	794.664	PC 36:6	H76C44P1O8N1	778.539	10	10000	6.29291	39.3041
PC	PC 35:2	H82Ci43P1O8N1	815.73	PC 34:2	H80C42P1O8N1	758.57	6.60822	2643.29	11.4038	23.6886
PC	PC 35:3	H80Ci43P1O8N1	813.715	PC 34:2	H80C42P1O8N1	758.57	6.60822	2643.29	9.92829	54.0497
PC	PC 35:4	H78Ci43P1O8N1	811.699	PC 36:4	H80C44P1O8N1	782.57	2	20000	8.5195	116.091
PC	PC 35:5	H76Ci43P1O8N1	809.683	PC 36:6	H76C44P1O8N1	778.539	10	10000	7.08624	75.0506
PC	PC 35:6	H74Ci43P1O8N1	807.667	PC 36:6	H76C44P1O8N1	778.539	10	10000	5.93342	36.5798
PC	PC 36:1	H86Ci44P1O8N1	832.765	PC 36:1	H86C44P1O8N1	788.617	50	10000	13.225	57.5696
PC	PC 36:2	H84Ci44P1O8N1	830.749	PC 36:2	H84C44P1O8N1	786.601	94.2929	18858.6	12.1308	176.521
PC	PC 36:3	H82Ci44P1O8N1	828.734	PC 36:2	H84C44P1O8N1	786.601	94.2929	18858.6	10.9011	378.323
PC	PC 36:4	H80Ci44P1O8N1	826.718	PC 36:4	H80C44P1O8N1	782.57	2	20000	9.32298	535.537
PC	PC 36:5	H78Ci44P1O8N1	824.702	PC 36:6	H76C44P1O8N1	778.539	10	10000	7.93	1541.73
PC	PC 36:6	H76Ci44P1O8N1	822.687	PC 36:6	H76C44P1O8N1	778.539	10	10000	6.69254	381.26
PC	PC 38:3	H86Ci46P1O8N1	858.772	PC 44:0	H104C52P1O8N1	902.759	75	1000	12.6362	95.9647
PE	PE 34:1	H76Ci39P1O8N1	757.669	PE 34:1	H76C39P1O8N1	718.539	0.204361	204.361	12.4556	465.8
PE	PE 34:2	H74Ci39P1O8N1	755.654	PE 36:2	H78C41P1O8N1	744.555	3.02553	302.553	11.3386	777.359
PE	PE 34:3	H72Ci39P1O8N1	753.638	PE 36:2	H78C41P1O8N1	744.555	3.02553	302.553	10.032	97.6829
PE	PE 36:1	H80Ci41P1O8N1	787.708	PE 34:1	H76C39P1O8N1	718.539	0.204361	204.361	13.5774	141.388
PE	PE 36:2	H78Ci41P1O8N1	785.692	PE 36:2	H78C41P1O8N1	744.555	3.02553	302.553	12.5656	556.692
PE	PE 36:3	H76Ci41P1O8N1	783.676	PE 36:2	H78C41P1O8N1	744.555	3.02553	302.553	11.4613	395.712
PE	PE 36:4	H74Ci41P1O8N1	781.661	PE 36:2	H78C41P1O8N1	744.555	3.02553	302.553	10.0008	447.185
PE	PE 36:5	H72Ci41P1O8N1	779.645	PE 36:2	H78C41P1O8N1	744.555	3.02553	302.553	8.54454	793.538
PE	PE 36:6	H70Ci41P1O8N1	777.629	PE 36:2	H78C41P1O8N1	744.555	3.02553	302.553	7.22521	51.9476
ST	Ergosterol	H44Ci28O1	407.43	Cholesterol	H46C27O1	369.352	50	1000	10.0959	105.699
TG	TG 50:3	H96Ci53O6N0	899.933	TG 48:3	H92C51O6N0	818.724	25	1000	16.9079	33.8825
TG	TG 50:4	H94Ci53O6N0	897.918	TG 48:3	H92C51O6N0	818.724	25	1000	16.708	29.2206
TG	TG 50:5	H92Ci53O6N0	895.902	TG 54:6	H98C57O6N0	896.771	1	1000	16.4749	12.0931
TG	TG 51:5	H94Ci54O6N0	910.921	TG 54:6	H98C57O6N0	896.771	1	1000	16.6083	3.8681
TG	TG 52:2	H102Ci55O6N0	931.987	TG 54:3	H104C57O6N0	902.818	3	3000	17.3009	27.5289
TG	TG 52:3	H100Ci55O6N0	929.971	TG 54:3	H104C57O6N0	902.818	3	3000	17.1128	85.0228
TG	TG 52:4	H98Ci55O6N0	927.956	TG 54:3	H104C57O6N0	902.818	3	3000	16.9222	104.491
TG	TG 52:5	H96Ci55O6N0	925.94	TG 54:6	H98C57O6N0	896.771	1	1000	16.7257	103.207
TG	TG 52:6	H94Ci55O6N0	923.924	TG 54:6	H98C57O6N0	896.771	1	1000	16.4868	50.5753
TG	TG 52:7	H92Ci55O6N0	921.908	TG 54:6	H98C57O6N0	896.771	1	1000	16.2322	17.2994
TG	TG 53:3	H102Ci56O6N0	944.99	TG 54:3	H104C57O6N0	902.818	3	3000	17.2058	6.06111
TG	TG 53:4	H100Ci56O6N0	942.975	TG 54:3	H104C57O6N0	902.818	3	3000	17.0268	10.096
TG	TG 53:5	H98Ci56O6N0	940.959	TG 54:6	H98C57O6N0	896.771	1	1000	16.8426	16.0553
TG	TG 53:6	H96Ci56O6N0	938.943	TG 54:6	H98C57O6N0	896.771	1	1000	16.6279	13.3038
TG	TG 53:7	H94Ci56O6N0	936.928	TG 54:6	H98C57O6N0	896.771	1	1000	16.3958	7.31017
TG	TG 54:2	H106Ci57O6N0	962.025	TG 54:3	H104C57O6N0	902.818	3	3000	17.4973	22.0458
TG	TG 54:3	H104Ci57O6N0	960.009	TG 54:3	H104C57O6N0	902.818	3	3000	17.3013	114.493
TG	TG 54:4	H102Ci57O6N0	957.993	TG 54:3	H104C57O6N0	902.818	3	3000	17.1287	167.4
TG	TG 54:5	H100Ci57O6N0	955.978	TG 54:6	H98C57O6N0	896.771	1	1000	16.9535	265.466
TG	TG 54:6	H98Ci57O6N0	953.962	TG 54:6	H98C57O6N0	896.771	1	1000	16.7537	207.76
TG	TG 54:7	H96Ci57O6N0	951.946	TG 54:6	H98C57O6N0	896.771	1	1000	16.5305	158.941
TG	TG 54:8	H94Ci57O6N0	949.931	TG 54:9	H92C57O6N0	890.724	25	1000	16.283	86.1183
TG	TG 54:9	H92Ci57O6N0	947.914	TG 54:9	H92C57O6N0	890.724	50	1000	16.0019	89.3849
PG	PG 34:1	H77Ci40O10P1	787.652	PG 34:1	H77C40O10P1	747.518	1	1000	10.9791	44.228

## Sheet: Sequence
Bracket Type=4
Sample Type	File Name	Sample ID	Path	Instrument Method	Process Method	Position	Inj Vol	Level	Sample Wt	Sample Vol	ISTD Amt	Dil Factor	L1 Study	L2 Client	L3 Laboratory	L4 Company	L5 Phone	Comment	Sample Name	Calibration File
Unknown	Blank_Solvent_no_rpMS1_posneg_1	Sample1	D:\USER DATA\2020\KW-11\200310_HS_RP-FIA_20DONORS_FINAL	C:\Xcalibur\methods\Harald\RP_23min\200303_Lipid_RP23min_posneg_FullMS		R:A1	2		0	0	0	1
Unknown	Blank_Solvent_no_rpMS1_posneg_2	Sample1	D:\USER DATA\2020\KW-11\200310_HS_RP-FIA_20DONORS_FINAL	C:\Xcalibur\methods\Harald\RP_23min\200303_Lipid_RP23min_posneg_FullMS		R:A1	2		0	0	0	1
Unknown	Blank_Solvent_no_rpMS1_posneg_3	Sample1	D:\USER DATA\2020\KW-11\200310_HS_RP-FIA_20DONORS_FINAL	C:\Xcalibur\methods\Harald\RP_23min\200303_Lipid_RP23min_posneg_FullMS		R:A1	2		0	0	0	1
Unknown	QC_yeast_no_rpMS1_posneg_1	Sample1	D:\USER DATA\2020\KW-11\200310_HS_RP-FIA_20DONORS_FINAL	C:\Xcalibur\methods\Harald\RP_23min\200303_Lipid_RP23min_posneg_FullMS		R:A2	2		0	0	0	1
Unknown	QC_yeast_no_rpMS1_posneg_2	Sample1	D:\USER DATA\2020\KW-11\200310_HS_RP-FIA_20DONORS_FINAL	C:\Xcalibur\methods\Harald\RP_23min\200303_Lipid_RP23min_posneg_FullMS		R:A2	2		0	0	0	1
Unknown	QC_yeast_no_rpMS1_posneg_3	Sample1	D:\USER DATA\2020\KW-11\200310_HS_RP-FIA_20DONORS_FINAL	C:\Xcalibur\methods\Harald\RP_23min\200303_Lipid_RP23min_posneg_FullMS		R:A2	2		0	0	0	1
Unknown	QC_yeast_no_rpMS1_posneg_4	Sample1	D:\USER DATA\2020\KW-11\200310_HS_RP-FIA_20DONORS_FINAL	C:\Xcalibur\methods\Harald\RP_23min\200303_Lipid_RP23min_posneg_FullMS		R:A2	2		0	0	0	1
Unknown	QC_yeast_no_rpMS1_posneg_5	Sample1	D:\USER DATA\2020\KW-11\200310_HS_RP-FIA_20DONORS_FINAL	C:\Xcalibur\methods\Harald\RP_23min\200303_Lipid_RP23min_posneg_FullMS		R:A2	2		0	0	0	1
Unknown	Blank_Solvent_no_rpMS1_posneg_4	Sample1	D:\USER DATA\2020\KW-11\200310_HS_RP-FIA_20DONORS_FINAL	C:\Xcalibur\methods\Harald\RP_23min\200303_Lipid_RP23min_posneg_FullMS		R:A1	2		0	0	0	1
Unknown	plasma_SRM_LILY_rpMS1_posneg_1_Splash	Sample1	D:\USER DATA\2020\KW-11\200310_HS_RP-FIA_20DONORS_FINAL	C:\Xcalibur\methods\Harald\RP_23min\200303_Lipid_RP23min_posneg_FullMS		R:A3	2		0	0	0	1
Unknown	Blank_Solvent_no_fiaDIA_posneg_1_switch	Sample1	D:\USER DATA\2020\KW-11\200310_HS_RP-FIA_20DONORS_FINAL	C:\Xcalibur\methods\Harald\FlowInjectionAnalysis\200309_10min_01_0005_025_01mlmin_25u_DIAposneg		R:A1	25		0	0	0	1
Unknown	QC_ESTD10nM_LILY_fiaDIA_posneg_1	Sample1	D:\USER DATA\2020\KW-11\200310_HS_RP-FIA_20DONORS_FINAL	C:\Xcalibur\methods\Harald\FlowInjectionAnalysis\200309_10min_01_0005_025_01mlmin_25u_DIAposneg		R:A4	25		0	0	0	1
Unknown	QC_ESTD100nM_LILY_fiaDIA_posneg_1	Sample1	D:\USER DATA\2020\KW-11\200310_HS_RP-FIA_20DONORS_FINAL	C:\Xcalibur\methods\Harald\FlowInjectionAnalysis\200309_10min_01_0005_025_01mlmin_25u_DIAposneg		R:A5	25		0	0	0	1
Unknown	QC_ESTD1000nM_LILY_fiaDIA_posneg_1	Sample1	D:\USER DATA\2020\KW-11\200310_HS_RP-FIA_20DONORS_FINAL	C:\Xcalibur\methods\Harald\FlowInjectionAnalysis\200309_10min_01_0005_025_01mlmin_25u_DIAposneg		R:A6	25		0	0	0	1
Unknown	QC_ESTD10000nM_LILY_fiaDIA_posneg_1	Sample1	D:\USER DATA\2020\KW-11\200310_HS_RP-FIA_20DONORS_FINAL	C:\Xcalibur\methods\Harald\FlowInjectionAnalysis\200309_10min_01_0005_025_01mlmin_25u_DIAposneg		R:A7	25		0	0	0	1
Unknown	Blank_Solvent_no_fiaDIA_posneg_2	Sample1	D:\USER DATA\2020\KW-11\200310_HS_RP-FIA_20DONORS_FINAL	C:\Xcalibur\methods\Harald\FlowInjectionAnalysis\200309_10min_01_0005_025_01mlmin_25u_DIAposneg		R:A1	25		0	0	0	1
Unknown	Blank_ISTD_LILY_fiaDIA_posneg_1	Sample1	D:\USER DATA\2020\KW-11\200310_HS_RP-FIA_20DONORS_FINAL	C:\Xcalibur\methods\Harald\FlowInjectionAnalysis\200309_10min_01_0005_025_01mlmin_25u_DIAposneg		R:B1	25		0	0	0	1
Unknown	Blank_ISTD_LILY_fiaDIA_posneg_2	Sample1	D:\USER DATA\2020\KW-11\200310_HS_RP-FIA_20DONORS_FINAL	C:\Xcalibur\methods\Harald\FlowInjectionAnalysis\200309_10min_01_0005_025_01mlmin_25u_DIAposneg		R:B1	25		0	0	0	1
Unknown	Blank_ISTD_LILY_fiaDIA_posneg_3	Sample1	D:\USER DATA\2020\KW-11\200310_HS_RP-FIA_20DONORS_FINAL	C:\Xcalibur\methods\Harald\FlowInjectionAnalysis\200309_10min_01_0005_025_01mlmin_25u_DIAposneg		R:B1	25		0	0	0	1
Unknown	ESTD_1_LILY_fiaDIA_posneg_1	Sample1	D:\USER DATA\2020\KW-11\200310_HS_RP-FIA_20DONORS_FINAL	C:\Xcalibur\methods\Harald\FlowInjectionAnalysis\200309_10min_01_0005_025_01mlmin_25u_DIAposneg		R:B2	25		0	0	0	1
Unknown	ESTD_1_LILY_fiaDIA_posneg_2	Sample1	D:\USER DATA\2020\KW-11\200310_HS_RP-FIA_20DONORS_FINAL	C:\Xcalibur\methods\Harald\FlowInjectionAnalysis\200309_10min_01_0005_025_01mlmin_25u_DIAposneg		R:B2	25		0	0	0	1
Unknown	ESTD_1_LILY_fiaDIA_posneg_3	Sample1	D:\USER DATA\2020\KW-11\200310_HS_RP-FIA_20DONORS_FINAL	C:\Xcalibur\methods\Harald\FlowInjectionAnalysis\200309_10min_01_0005_025_01mlmin_25u_DIAposneg		R:B2	25		0	0	0	1
Unknown	ESTD_1_LILY_fiaDIA_posneg_4	Sample1	D:\USER DATA\2020\KW-11\200310_HS_RP-FIA_20DONORS_FINAL	C:\Xcalibur\methods\Harald\FlowInjectionAnalysis\200309_10min_01_0005_025_01mlmin_25u_DIAposneg		R:B2	25		0	0	0	1
Unknown	ESTD_1_LILY_fiaDIA_posneg_5	Sample1	D:\USER DATA\2020\KW-11\200310_HS_RP-FIA_20DONORS_FINAL	C:\Xcalibur\methods\Harald\FlowInjectionAnalysis\200309_10min_01_0005_025_01mlmin_25u_DIAposneg		R:B2	25		0	0	0	1
Unknown	ESTD_1_LILY_fiaDIA_posneg_6	Sample1	D:\USER DATA\2020\KW-11\200310_HS_RP-FIA_20DONORS_FINAL	C:\Xcalibur\methods\Harald\FlowInjectionAnalysis\200309_10min_01_0005_025_01mlmin_25u_DIAposneg		R:B2	25		0	0	0	1
Unknown	ESTD_5_LILY_fiaDIA_posneg_1	Sample1	D:\USER DATA\2020\KW-11\200310_HS_RP-FIA_20DONORS_FINAL	C:\Xcalibur\methods\Harald\FlowInjectionAnalysis\200309_10min_01_0005_025_01mlmin_25u_DIAposneg		R:B3	25		0	0	0	1
Unknown	ESTD_10_LILY_fiaDIA_posneg_1	Sample1	D:\USER DATA\2020\KW-11\200310_HS_RP-FIA_20DONORS_FINAL	C:\Xcalibur\methods\Harald\FlowInjectionAnalysis\200309_10min_01_0005_025_01mlmin_25u_DIAposneg		R:B4	25		0	0	0	1
Unknown	ESTD_10_LILY_fiaDIA_posneg_2	Sample1	D:\USER DATA\2020\KW-11\200310_HS_RP-FIA_20DONORS_FINAL	C:\Xcalibur\methods\Harald\FlowInjectionAnalysis\200309_10min_01_0005_025_01mlmin_25u_DIAposneg		R:B4	25		0	0	0	1
Unknown	ESTD_10_LILY_fiaDIA_posneg_3	Sample1	D:\USER DATA\2020\KW-11\200310_HS_RP-FIA_20DONORS_FINAL	C:\Xcalibur\methods\Harald\FlowInjectionAnalysis\200309_10min_01_0005_025_01mlmin_25u_DIAposneg		R:B4	25		0	0	0	1
Unknown	ESTD_10_LILY_fiaDIA_posneg_4	Sample1	D:\USER DATA\2020\KW-11\200310_HS_RP-FIA_20DONORS_FINAL	C:\Xcalibur\methods\Harald\FlowInjectionAnalysis\200309_10min_01_0005_025_01mlmin_25u_DIAposneg		R:B4	25		0	0	0	1
Unknown	ESTD_10_LILY_fiaDIA_posneg_5	Sample1	D:\USER DATA\2020\KW-11\200310_HS_RP-FIA_20DONORS_FINAL	C:\Xcalibur\methods\Harald\FlowInjectionAnalysis\200309_10min_01_0005_025_01mlmin_25u_DIAposneg		R:B4	25		0	0	0	1
Unknown	ESTD_10_LILY_fiaDIA_posneg_6	Sample1	D:\USER DATA\2020\KW-11\200310_HS_RP-FIA_20DONORS_FINAL	C:\Xcalibur\methods\Harald\FlowInjectionAnalysis\200309_10min_01_0005_025_01mlmin_25u_DIAposneg		R:B4	25		0	0	0	1
Unknown	ESTD_25_LILY_fiaDIA_posneg_1	Sample1	D:\USER DATA\2020\KW-11\200310_HS_RP-FIA_20DONORS_FINAL	C:\Xcalibur\methods\Harald\FlowInjectionAnalysis\200309_10min_01_0005_025_01mlmin_25u_DIAposneg		R:B5	25		0	0	0	1
Unknown	ESTD_50_LILY_fiaDIA_posneg_1	Sample1	D:\USER DATA\2020\KW-11\200310_HS_RP-FIA_20DONORS_FINAL	C:\Xcalibur\methods\Harald\FlowInjectionAnalysis\200309_10min_01_0005_025_01mlmin_25u_DIAposneg		R:B6	25		0	0	0	1
Unknown	ESTD_75_LILY_fiaDIA_posneg_1	Sample1	D:\USER DATA\2020\KW-11\200310_HS_RP-FIA_20DONORS_FINAL	C:\Xcalibur\methods\Harald\FlowInjectionAnalysis\200309_10min_01_0005_025_01mlmin_25u_DIAposneg		R:B7	25		0	0	0	1
Unknown	ESTD_100_LILY_fiaDIA_posneg_1	Sample1	D:\USER DATA\2020\KW-11\200310_HS_RP-FIA_20DONORS_FINAL	C:\Xcalibur\methods\Harald\FlowInjectionAnalysis\200309_10min_01_0005_025_01mlmin_25u_DIAposneg		R:B8	25		0	0	0	1
Unknown	ESTD_100_LILY_fiaDIA_posneg_2	Sample1	D:\USER DATA\2020\KW-11\200310_HS_RP-FIA_20DONORS_FINAL	C:\Xcalibur\methods\Harald\FlowInjectionAnalysis\200309_10min_01_0005_025_01mlmin_25u_DIAposneg		R:B8	25		0	0	0	1
Unknown	ESTD_100_LILY_fiaDIA_posneg_3	Sample1	D:\USER DATA\2020\KW-11\200310_HS_RP-FIA_20DONORS_FINAL	C:\Xcalibur\methods\Harald\FlowInjectionAnalysis\200309_10min_01_0005_025_01mlmin_25u_DIAposneg		R:B8	25		0	0	0	1
Unknown	ESTD_100_LILY_fiaDIA_posneg_4	Sample1	D:\USER DATA\2020\KW-11\200310_HS_RP-FIA_20DONORS_FINAL	C:\Xcalibur\methods\Harald\FlowInjectionAnalysis\200309_10min_01_0005_025_01mlmin_25u_DIAposneg		R:B8	25		0	0	0	1
Unknown	ESTD_100_LILY_fiaDIA_posneg_5	Sample1	D:\USER DATA\2020\KW-11\200310_HS_RP-FIA_20DONORS_FINAL	C:\Xcalibur\methods\Harald\FlowInjectionAnalysis\200309_10min_01_0005_025_01mlmin_25u_DIAposneg		R:B8	25		0	0	0	1
Unknown	ESTD_100_LILY_fiaDIA_posneg_6	Sample1	D:\USER DATA\2020\KW-11\200310_HS_RP-FIA_20DONORS_FINAL	C:\Xcalibur\methods\Harald\FlowInjectionAnalysis\200309_10min_01_0005_025_01mlmin_25u_DIAposneg		R:B8	25		0	0	0	1
Unknown	ESTD_250_LILY_fiaDIA_posneg_1	Sample1	D:\USER DATA\2020\KW-11\200310_HS_RP-FIA_20DONORS_FINAL	C:\Xcalibur\methods\Harald\FlowInjectionAnalysis\200309_10min_01_0005_025_01mlmin_25u_DIAposneg		R:B9	25		0	0	0	1
Unknown	ESTD_500_LILY_fiaDIA_posneg_1	Sample1	D:\USER DATA\2020\KW-11\200310_HS_RP-FIA_20DONORS_FINAL	C:\Xcalibur\methods\Harald\FlowInjectionAnalysis\200309_10min_01_0005_025_01mlmin_25u_DIAposneg		R:C1	25		0	0	0	1
Unknown	ESTD_750_LILY_fiaDIA_posneg_1	Sample1	D:\USER DATA\2020\KW-11\200310_HS_RP-FIA_20DONORS_FINAL	C:\Xcalibur\methods\Harald\FlowInjectionAnalysis\200309_10min_01_0005_025_01mlmin_25u_DIAposneg		R:C2	25		0	0	0	1
Unknown	ESTD_1000_LILY_fiaDIA_posneg_1	Sample1	D:\USER DATA\2020\KW-11\200310_HS_RP-FIA_20DONORS_FINAL	C:\Xcalibur\methods\Harald\FlowInjectionAnalysis\200309_10min_01_0005_025_01mlmin_25u_DIAposneg		R:C3	25		0	0	0	1
Unknown	ESTD_5000_LILY_fiaDIA_posneg_1	Sample1	D:\USER DATA\2020\KW-11\200310_HS_RP-FIA_20DONORS_FINAL	C:\Xcalibur\methods\Harald\FlowInjectionAnalysis\200309_10min_01_0005_025_01mlmin_25u_DIAposneg		R:C4	25		0	0	0	1
Unknown	ESTD_10000_LILY_fiaDIA_posneg_1	Sample1	D:\USER DATA\2020\KW-11\200310_HS_RP-FIA_20DONORS_FINAL	C:\Xcalibur\methods\Harald\FlowInjectionAnalysis\200309_10min_01_0005_025_01mlmin_25u_DIAposneg		R:C5	25		0	0	0	1
Unknown	ESTD_25000_LILY_fiaDIA_posneg_1	Sample1	D:\USER DATA\2020\KW-11\200310_HS_RP-FIA_20DONORS_FINAL	C:\Xcalibur\methods\Harald\FlowInjectionAnalysis\200309_10min_01_0005_025_01mlmin_25u_DIAposneg		R:C6	25		0	0	0	1
Unknown	Blank_Solvent_no_rpMS1_posneg_5_switch	Sample1	D:\USER DATA\2020\KW-11\200310_HS_RP-FIA_20DONORS_FINAL	C:\Xcalibur\methods\Harald\RP_23min\200303_Lipid_RP23min_posneg_FullMS		R:A1	2		0	0	0	1
Unknown	plasma_SRM_LILY_rpMS1_posneg_2_Splash	Sample1	D:\USER DATA\2020\KW-11\200310_HS_RP-FIA_20DONORS_FINAL	C:\Xcalibur\methods\Harald\RP_23min\200303_Lipid_RP23min_posneg_FullMS		R:A3	2		0	0	0	1
Unknown	Blank_Solvent_no_rpMS1_posneg_6	Sample1	D:\USER DATA\2020\KW-11\200310_HS_RP-FIA_20DONORS_FINAL	C:\Xcalibur\methods\Harald\RP_23min\200303_Lipid_RP23min_posneg_FullMS		R:A1	2		0	0	0	1
Unknown	QC_ESTD10nM_LILY_rpMS1_posneg_1	Sample1	D:\USER DATA\2020\KW-11\200310_HS_RP-FIA_20DONORS_FINAL	C:\Xcalibur\methods\Harald\RP_23min\200303_Lipid_RP23min_posneg_FullMS		R:A4	2		0	0	0	1
Unknown	QC_ESTD100nM_LILY_rpMS1_posneg_1	Sample1	D:\USER DATA\2020\KW-11\200310_HS_RP-FIA_20DONORS_FINAL	C:\Xcalibur\methods\Harald\RP_23min\200303_Lipid_RP23min_posneg_FullMS		R:A5	2		0	0	0	1
Unknown	QC_ESTD1000nM_LILY_rpMS1_posneg_1	Sample1	D:\USER DATA\2020\KW-11\200310_HS_RP-FIA_20DONORS_FINAL	C:\Xcalibur\methods\Harald\RP_23min\200303_Lipid_RP23min_posneg_FullMS		R:A6	2		0	0	0	1
Unknown	QC_ESTD10000nM_LILY_rpMS1_posneg_1	Sample1	D:\USER DATA\2020\KW-11\200310_HS_RP-FIA_20DONORS_FINAL	C:\Xcalibur\methods\Harald\RP_23min\200303_Lipid_RP23min_posneg_FullMS		R:A7	2		0	0	0	1
Unknown	Blank_Solvent_no_rpMS1_posneg_7	Sample1	D:\USER DATA\2020\KW-11\200310_HS_RP-FIA_20DONORS_FINAL	C:\Xcalibur\methods\Harald\RP_23min\200303_Lipid_RP23min_posneg_FullMS		R:A1	2		0	0	0	1
Unknown	Blank_Extr_LILY_rpMS1_posneg_1_Splash	Sample1	D:\USER DATA\2020\KW-11\200310_HS_RP-FIA_20DONORS_FINAL	C:\Xcalibur\methods\Harald\RP_23min\200303_Lipid_RP23min_posneg_FullMS		R:A8	25		0	0	0	1
Unknown	Blank_Extr_LILY_rpMS1_posneg_2_Splash	Sample1	D:\USER DATA\2020\KW-11\200310_HS_RP-FIA_20DONORS_FINAL	C:\Xcalibur\methods\Harald\RP_23min\200303_Lipid_RP23min_posneg_FullMS		R:A8	25		0	0	0	1
Unknown	Blank_Extr_LILY_rpMS1_posneg_3_Splash	Sample1	D:\USER DATA\2020\KW-11\200310_HS_RP-FIA_20DONORS_FINAL	C:\Xcalibur\methods\Harald\RP_23min\200303_Lipid_RP23min_posneg_FullMS		R:A8	25		0	0	0	1
Unknown	plasma_Female02_LILY_rpMS1_posneg_1_Splash	Sample1	D:\USER DATA\2020\KW-11\200310_HS_RP-FIA_20DONORS_FINAL	C:\Xcalibur\methods\Harald\RP_23min\200303_Lipid_RP23min_posneg_FullMS		R:E2	2		0	0	0	1
Unknown	plasma_Female04_LILY_rpMS1_posneg_3_Splash	Sample1	D:\USER DATA\2020\KW-11\200310_HS_RP-FIA_20DONORS_FINAL	C:\Xcalibur\methods\Harald\RP_23min\200303_Lipid_RP23min_posneg_FullMS		R:E4	2		0	0	0	1
Unknown	plasma_Female04_LILY_rpMS1_posneg_2_Splash	Sample1	D:\USER DATA\2020\KW-11\200310_HS_RP-FIA_20DONORS_FINAL	C:\Xcalibur\methods\Harald\RP_23min\200303_Lipid_RP23min_posneg_FullMS		R:E4	2		0	0	0	1
Unknown	plasma_Male10_LILY_rpMS1_posneg_3_Splash	Sample1	D:\USER DATA\2020\KW-11\200310_HS_RP-FIA_20DONORS_FINAL	C:\Xcalibur\methods\Harald\RP_23min\200303_Lipid_RP23min_posneg_FullMS		R:C8	2		0	0	0	1
Unknown	plasma_Female06_LILY_rpMS1_posneg_2_Splash	Sample1	D:\USER DATA\2020\KW-11\200310_HS_RP-FIA_20DONORS_FINAL	C:\Xcalibur\methods\Harald\RP_23min\200303_Lipid_RP23min_posneg_FullMS		R:E6	2		0	0	0	1
Unknown	plasma_Female03_LILY_rpMS1_posneg_3_Splash	Sample1	D:\USER DATA\2020\KW-11\200310_HS_RP-FIA_20DONORS_FINAL	C:\Xcalibur\methods\Harald\RP_23min\200303_Lipid_RP23min_posneg_FullMS		R:E3	2		0	0	0	1
Unknown	plasma_Male01_LILY_rpMS1_posneg_3_Splash	Sample1	D:\USER DATA\2020\KW-11\200310_HS_RP-FIA_20DONORS_FINAL	C:\Xcalibur\methods\Harald\RP_23min\200303_Lipid_RP23min_posneg_FullMS		R:D1	2		0	0	0	1
Unknown	plasma_Male06_LILY_rpMS1_posneg_3_Splash	Sample1	D:\USER DATA\2020\KW-11\200310_HS_RP-FIA_20DONORS_FINAL	C:\Xcalibur\methods\Harald\RP_23min\200303_Lipid_RP23min_posneg_FullMS		R:D6	2		0	0	0	1
Unknown	plasma_Female09_LILY_rpMS1_posneg_2_Splash	Sample1	D:\USER DATA\2020\KW-11\200310_HS_RP-FIA_20DONORS_FINAL	C:\Xcalibur\methods\Harald\RP_23min\200303_Lipid_RP23min_posneg_FullMS		R:E9	2		0	0	0	1
Unknown	plasma_Female01_LILY_rpMS1_posneg_2_Splash	Sample1	D:\USER DATA\2020\KW-11\200310_HS_RP-FIA_20DONORS_FINAL	C:\Xcalibur\methods\Harald\RP_23min\200303_Lipid_RP23min_posneg_FullMS		R:E1	2		0	0	0	1
Unknown	plasma_Female10_LILY_rpMS1_posneg_3_Splash	Sample1	D:\USER DATA\2020\KW-11\200310_HS_RP-FIA_20DONORS_FINAL	C:\Xcalibur\methods\Harald\RP_23min\200303_Lipid_RP23min_posneg_FullMS		R:C9	2		0	0	0	1
Unknown	plasma_Female05_LILY_rpMS1_posneg_1_Splash	Sample1	D:\USER DATA\2020\KW-11\200310_HS_RP-FIA_20DONORS_FINAL	C:\Xcalibur\methods\Harald\RP_23min\200303_Lipid_RP23min_posneg_FullMS		R:E5	2		0	0	0	1
Unknown	plasma_Female06_LILY_rpMS1_posneg_1_Splash	Sample1	D:\USER DATA\2020\KW-11\200310_HS_RP-FIA_20DONORS_FINAL	C:\Xcalibur\methods\Harald\RP_23min\200303_Lipid_RP23min_posneg_FullMS		R:E6	2		0	0	0	1
Unknown	plasma_Male04_LILY_rpMS1_posneg_3_Splash	Sample1	D:\USER DATA\2020\KW-11\200310_HS_RP-FIA_20DONORS_FINAL	C:\Xcalibur\methods\Harald\RP_23min\200303_Lipid_RP23min_posneg_FullMS		R:D4	2		0	0	0	1
Unknown	plasma_Male10_LILY_rpMS1_posneg_2_Splash	Sample1	D:\USER DATA\2020\KW-11\200310_HS_RP-FIA_20DONORS_FINAL	C:\Xcalibur\methods\Harald\RP_23min\200303_Lipid_RP23min_posneg_FullMS		R:C8	2		0	0	0	1
Unknown	Blank_Solvent_no_rpMS1_posneg_8	Sample1	D:\USER DATA\2020\KW-11\200310_HS_RP-FIA_20DONORS_FINAL	C:\Xcalibur\methods\Harald\RP_23min\200303_Lipid_RP23min_posneg_FullMS		R:A1	2		0	0	0	1
Unknown	plasma_SRM_LILY_rpMS1_posneg_3_Splash	Sample1	D:\USER DATA\2020\KW-11\200310_HS_RP-FIA_20DONORS_FINAL	C:\Xcalibur\methods\Harald\RP_23min\200303_Lipid_RP23min_posneg_FullMS		R:A3	2		0	0	0	1
Unknown	Blank_Solvent_no_fiaDIA_posneg_3_switch	Sample1	D:\USER DATA\2020\KW-11\200310_HS_RP-FIA_20DONORS_FINAL	C:\Xcalibur\methods\Harald\FlowInjectionAnalysis\200309_10min_01_0005_025_01mlmin_25u_DIAposneg		R:A1	25		0	0	0	1
Unknown	QC_ESTD10nM_LILY_fiaDIA_posneg_2	Sample1	D:\USER DATA\2020\KW-11\200310_HS_RP-FIA_20DONORS_FINAL	C:\Xcalibur\methods\Harald\FlowInjectionAnalysis\200309_10min_01_0005_025_01mlmin_25u_DIAposneg		R:A4	25		0	0	0	1
Unknown	QC_ESTD100nM_LILY_fiaDIA_posneg_2	Sample1	D:\USER DATA\2020\KW-11\200310_HS_RP-FIA_20DONORS_FINAL	C:\Xcalibur\methods\Harald\FlowInjectionAnalysis\200309_10min_01_0005_025_01mlmin_25u_DIAposneg		R:A5	25		0	0	0	1
Unknown	QC_ESTD1000nM_LILY_fiaDIA_posneg_2	Sample1	D:\USER DATA\2020\KW-11\200310_HS_RP-FIA_20DONORS_FINAL	C:\Xcalibur\methods\Harald\FlowInjectionAnalysis\200309_10min_01_0005_025_01mlmin_25u_DIAposneg		R:A6	25		0	0	0	1
Unknown	QC_ESTD10000nM_LILY_fiaDIA_posneg_2	Sample1	D:\USER DATA\2020\KW-11\200310_HS_RP-FIA_20DONORS_FINAL	C:\Xcalibur\methods\Harald\FlowInjectionAnalysis\200309_10min_01_0005_025_01mlmin_25u_DIAposneg		R:A7	25		0	0	0	1
Unknown	Blank_Solvent_no_fiaDIA_posneg_4	Sample1	D:\USER DATA\2020\KW-11\200310_HS_RP-FIA_20DONORS_FINAL	C:\Xcalibur\methods\Harald\FlowInjectionAnalysis\200309_10min_01_0005_025_01mlmin_25u_DIAposneg		R:A1	25		0	0	0	1
Unknown	Blank_Solvent_no_rpMS1_posneg_9_switch	Sample1	D:\USER DATA\2020\KW-11\200310_HS_RP-FIA_20DONORS_FINAL	C:\Xcalibur\methods\Harald\RP_23min\200303_Lipid_RP23min_posneg_FullMS		R:A1	2		0	0	0	1
Unknown	plasma_Female03_LILY_rpMS1_posneg_1_Splash	Sample1	D:\USER DATA\2020\KW-11\200310_HS_RP-FIA_20DONORS_FINAL	C:\Xcalibur\methods\Harald\RP_23min\200303_Lipid_RP23min_posneg_FullMS		R:E3	2		0	0	0	1
Unknown	plasma_Female02_LILY_rpMS1_posneg_2_Splash	Sample1	D:\USER DATA\2020\KW-11\200310_HS_RP-FIA_20DONORS_FINAL	C:\Xcalibur\methods\Harald\RP_23min\200303_Lipid_RP23min_posneg_FullMS		R:E2	2		0	0	0	1
Unknown	plasma_Female09_LILY_rpMS1_posneg_1_Splash	Sample1	D:\USER DATA\2020\KW-11\200310_HS_RP-FIA_20DONORS_FINAL	C:\Xcalibur\methods\Harald\RP_23min\200303_Lipid_RP23min_posneg_FullMS		R:E9	2		0	0	0	1
Unknown	plasma_Male02_LILY_rpMS1_posneg_1_Splash	Sample1	D:\USER DATA\2020\KW-11\200310_HS_RP-FIA_20DONORS_FINAL	C:\Xcalibur\methods\Harald\RP_23min\200303_Lipid_RP23min_posneg_FullMS		R:D2	2		0	0	0	1
Unknown	plasma_Male08_LILY_rpMS1_posneg_2_Splash	Sample1	D:\USER DATA\2020\KW-11\200310_HS_RP-FIA_20DONORS_FINAL	C:\Xcalibur\methods\Harald\RP_23min\200303_Lipid_RP23min_posneg_FullMS		R:D8	2		0	0	0	1
Unknown	plasma_Male03_LILY_rpMS1_posneg_1_Splash	Sample1	D:\USER DATA\2020\KW-11\200310_HS_RP-FIA_20DONORS_FINAL	C:\Xcalibur\methods\Harald\RP_23min\200303_Lipid_RP23min_posneg_FullMS		R:D3	2		0	0	0	1
Unknown	plasma_Male08_LILY_rpMS1_posneg_1_Splash	Sample1	D:\USER DATA\2020\KW-11\200310_HS_RP-FIA_20DONORS_FINAL	C:\Xcalibur\methods\Harald\RP_23min\200303_Lipid_RP23min_posneg_FullMS		R:D8	2		0	0	0	1
Unknown	plasma_Male09_LILY_rpMS1_posneg_2_Splash	Sample1	D:\USER DATA\2020\KW-11\200310_HS_RP-FIA_20DONORS_FINAL	C:\Xcalibur\methods\Harald\RP_23min\200303_Lipid_RP23min_posneg_FullMS		R:D9	2		0	0	0	1
Unknown	plasma_Male06_LILY_rpMS1_posneg_2_Splash	Sample1	D:\USER DATA\2020\KW-11\200310_HS_RP-FIA_20DONORS_FINAL	C:\Xcalibur\methods\Harald\RP_23min\200303_Lipid_RP23min_posneg_FullMS		R:D6	2		0	0	0	1
Unknown	plasma_Male08_LILY_rpMS1_posneg_3_Splash	Sample1	D:\USER DATA\2020\KW-11\200310_HS_RP-FIA_20DONORS_FINAL	C:\Xcalibur\methods\Harald\RP_23min\200303_Lipid_RP23min_posneg_FullMS		R:D8	2		0	0	0	1
Unknown	plasma_Male04_LILY_rpMS1_posneg_1_Splash	Sample1	D:\USER DATA\2020\KW-11\200310_HS_RP-FIA_20DONORS_FINAL	C:\Xcalibur\methods\Harald\RP_23min\200303_Lipid_RP23min_posneg_FullMS		R:D4	2		0	0	0	1
Unknown	plasma_Male01_LILY_rpMS1_posneg_1_Splash	Sample1	D:\USER DATA\2020\KW-11\200310_HS_RP-FIA_20DONORS_FINAL	C:\Xcalibur\methods\Harald\RP_23min\200303_Lipid_RP23min_posneg_FullMS		R:D1	2		0	0	0	1
Unknown	plasma_Male02_LILY_rpMS1_posneg_3_Splash	Sample1	D:\USER DATA\2020\KW-11\200310_HS_RP-FIA_20DONORS_FINAL	C:\Xcalibur\methods\Harald\RP_23min\200303_Lipid_RP23min_posneg_FullMS		R:D2	2		0	0	0	1
Unknown	plasma_Female02_LILY_rpMS1_posneg_3_Splash	Sample1	D:\USER DATA\2020\KW-11\200310_HS_RP-FIA_20DONORS_FINAL	C:\Xcalibur\methods\Harald\RP_23min\200303_Lipid_RP23min_posneg_FullMS		R:E2	2		0	0	0	1
Unknown	plasma_Female08_LILY_rpMS1_posneg_1_Splash	Sample1	D:\USER DATA\2020\KW-11\200310_HS_RP-FIA_20DONORS_FINAL	C:\Xcalibur\methods\Harald\RP_23min\200303_Lipid_RP23min_posneg_FullMS		R:E8	2		0	0	0	1
Unknown	Blank_Solvent_no_rpMS1_posneg_10	Sample1	D:\USER DATA\2020\KW-11\200310_HS_RP-FIA_20DONORS_FINAL	C:\Xcalibur\methods\Harald\RP_23min\200303_Lipid_RP23min_posneg_FullMS		R:A1	2		0	0	0	1
Unknown	plasma_SRM_LILY_rpMS1_posneg_4_Splash	Sample1	D:\USER DATA\2020\KW-11\200310_HS_RP-FIA_20DONORS_FINAL	C:\Xcalibur\methods\Harald\RP_23min\200303_Lipid_RP23min_posneg_FullMS		R:A3	2		0	0	0	1
Unknown	Blank_Solvent_no_rpMS1_posneg_11	Sample1	D:\USER DATA\2020\KW-11\200310_HS_RP-FIA_20DONORS_FINAL	C:\Xcalibur\methods\Harald\RP_23min\200303_Lipid_RP23min_posneg_FullMS		R:A1	2		0	0	0	1
Unknown	QC_ESTD10nM_LILY_rpMS1_posneg_2	Sample1	D:\USER DATA\2020\KW-11\200310_HS_RP-FIA_20DONORS_FINAL	C:\Xcalibur\methods\Harald\RP_23min\200303_Lipid_RP23min_posneg_FullMS		R:A4	2		0	0	0	1
Unknown	QC_ESTD100nM_LILY_rpMS1_posneg_2	Sample1	D:\USER DATA\2020\KW-11\200310_HS_RP-FIA_20DONORS_FINAL	C:\Xcalibur\methods\Harald\RP_23min\200303_Lipid_RP23min_posneg_FullMS		R:A5	2		0	0	0	1
Unknown	QC_ESTD1000nM_LILY_rpMS1_posneg_2	Sample1	D:\USER DATA\2020\KW-11\200310_HS_RP-FIA_20DONORS_FINAL	C:\Xcalibur\methods\Harald\RP_23min\200303_Lipid_RP23min_posneg_FullMS		R:A6	2		0	0	0	1
Unknown	QC_ESTD10000nM_LILY_rpMS1_posneg_2	Sample1	D:\USER DATA\2020\KW-11\200310_HS_RP-FIA_20DONORS_FINAL	C:\Xcalibur\methods\Harald\RP_23min\200303_Lipid_RP23min_posneg_FullMS		R:A7	2		0	0	0	1
Unknown	Blank_Solvent_no_rpMS1_posneg_12	Sample1	D:\USER DATA\2020\KW-11\200310_HS_RP-FIA_20DONORS_FINAL	C:\Xcalibur\methods\Harald\RP_23min\200303_Lipid_RP23min_posneg_FullMS		R:A1	2		0	0	0	1
Unknown	plasma_Male06_LILY_rpMS1_posneg_1_Splash	Sample1	D:\USER DATA\2020\KW-11\200310_HS_RP-FIA_20DONORS_FINAL	C:\Xcalibur\methods\Harald\RP_23min\200303_Lipid_RP23min_posneg_FullMS		R:D6	2		0	0	0	1
Unknown	plasma_Female06_LILY_rpMS1_posneg_3_Splash	Sample1	D:\USER DATA\2020\KW-11\200310_HS_RP-FIA_20DONORS_FINAL	C:\Xcalibur\methods\Harald\RP_23min\200303_Lipid_RP23min_posneg_FullMS		R:E6	2		0	0	0	1
Unknown	plasma_Male03_LILY_rpMS1_posneg_3_Splash	Sample1	D:\USER DATA\2020\KW-11\200310_HS_RP-FIA_20DONORS_FINAL	C:\Xcalibur\methods\Harald\RP_23min\200303_Lipid_RP23min_posneg_FullMS		R:D3	2		0	0	0	1
Unknown	plasma_Female07_LILY_rpMS1_posneg_3_Splash	Sample1	D:\USER DATA\2020\KW-11\200310_HS_RP-FIA_20DONORS_FINAL	C:\Xcalibur\methods\Harald\RP_23min\200303_Lipid_RP23min_posneg_FullMS		R:E7	2		0	0	0	1
Unknown	plasma_Male07_LILY_rpMS1_posneg_2_Splash	Sample1	D:\USER DATA\2020\KW-11\200310_HS_RP-FIA_20DONORS_FINAL	C:\Xcalibur\methods\Harald\RP_23min\200303_Lipid_RP23min_posneg_FullMS		R:D7	2		0	0	0	1
Unknown	plasma_Male01_LILY_rpMS1_posneg_2_Splash	Sample1	D:\USER DATA\2020\KW-11\200310_HS_RP-FIA_20DONORS_FINAL	C:\Xcalibur\methods\Harald\RP_23min\200303_Lipid_RP23min_posneg_FullMS		R:D1	2		0	0	0	1
Unknown	plasma_Male03_LILY_rpMS1_posneg_2_Splash	Sample1	D:\USER DATA\2020\KW-11\200310_HS_RP-FIA_20DONORS_FINAL	C:\Xcalibur\methods\Harald\RP_23min\200303_Lipid_RP23min_posneg_FullMS		R:D3	2		0	0	0	1
Unknown	plasma_Female10_LILY_rpMS1_posneg_2_Splash	Sample1	D:\USER DATA\2020\KW-11\200310_HS_RP-FIA_20DONORS_FINAL	C:\Xcalibur\methods\Harald\RP_23min\200303_Lipid_RP23min_posneg_FullMS		R:C9	2		0	0	0	1
Unknown	plasma_Female10_LILY_rpMS1_posneg_1_Splash	Sample1	D:\USER DATA\2020\KW-11\200310_HS_RP-FIA_20DONORS_FINAL	C:\Xcalibur\methods\Harald\RP_23min\200303_Lipid_RP23min_posneg_FullMS		R:C9	2		0	0	0	1
Unknown	plasma_Female05_LILY_rpMS1_posneg_3_Splash	Sample1	D:\USER DATA\2020\KW-11\200310_HS_RP-FIA_20DONORS_FINAL	C:\Xcalibur\methods\Harald\RP_23min\200303_Lipid_RP23min_posneg_FullMS		R:E5	2		0	0	0	1
Unknown	plasma_Female03_LILY_rpMS1_posneg_2_Splash	Sample1	D:\USER DATA\2020\KW-11\200310_HS_RP-FIA_20DONORS_FINAL	C:\Xcalibur\methods\Harald\RP_23min\200303_Lipid_RP23min_posneg_FullMS		R:E3	2		0	0	0	1
Unknown	plasma_Male07_LILY_rpMS1_posneg_3_Splash	Sample1	D:\USER DATA\2020\KW-11\200310_HS_RP-FIA_20DONORS_FINAL	C:\Xcalibur\methods\Harald\RP_23min\200303_Lipid_RP23min_posneg_FullMS		R:D7	2		0	0	0	1
Unknown	plasma_Female07_LILY_rpMS1_posneg_2_Splash	Sample1	D:\USER DATA\2020\KW-11\200310_HS_RP-FIA_20DONORS_FINAL	C:\Xcalibur\methods\Harald\RP_23min\200303_Lipid_RP23min_posneg_FullMS		R:E7	2		0	0	0	1
Unknown	plasma_Male10_LILY_rpMS1_posneg_1_Splash	Sample1	D:\USER DATA\2020\KW-11\200310_HS_RP-FIA_20DONORS_FINAL	C:\Xcalibur\methods\Harald\RP_23min\200303_Lipid_RP23min_posneg_FullMS		R:C8	2		0	0	0	1
Unknown	plasma_Male07_LILY_rpMS1_posneg_1_Splash	Sample1	D:\USER DATA\2020\KW-11\200310_HS_RP-FIA_20DONORS_FINAL	C:\Xcalibur\methods\Harald\RP_23min\200303_Lipid_RP23min_posneg_FullMS		R:D7	2		0	0	0	1
Unknown	Blank_Solvent_no_rpMS1_posneg_13	Sample1	D:\USER DATA\2020\KW-11\200310_HS_RP-FIA_20DONORS_FINAL	C:\Xcalibur\methods\Harald\RP_23min\200303_Lipid_RP23min_posneg_FullMS		R:A1	2		0	0	0	1
Unknown	plasma_SRM_LILY_rpMS1_posneg_5_Splash	Sample1	D:\USER DATA\2020\KW-11\200310_HS_RP-FIA_20DONORS_FINAL	C:\Xcalibur\methods\Harald\RP_23min\200303_Lipid_RP23min_posneg_FullMS		R:A3	2		0	0	0	1
Unknown	Blank_Solvent_no_fiaDIA_posneg_5_switch	Sample1	D:\USER DATA\2020\KW-11\200310_HS_RP-FIA_20DONORS_FINAL	C:\Xcalibur\methods\Harald\FlowInjectionAnalysis\200309_10min_01_0005_025_01mlmin_25u_DIAposneg		R:A1	25		0	0	0	1
Unknown	QC_ESTD10nM_LILY_fiaDIA_posneg_3	Sample1	D:\USER DATA\2020\KW-11\200310_HS_RP-FIA_20DONORS_FINAL	C:\Xcalibur\methods\Harald\FlowInjectionAnalysis\200309_10min_01_0005_025_01mlmin_25u_DIAposneg		R:A4	25		0	0	0	1
Unknown	QC_ESTD100nM_LILY_fiaDIA_posneg_3	Sample1	D:\USER DATA\2020\KW-11\200310_HS_RP-FIA_20DONORS_FINAL	C:\Xcalibur\methods\Harald\FlowInjectionAnalysis\200309_10min_01_0005_025_01mlmin_25u_DIAposneg		R:A5	25		0	0	0	1
Unknown	QC_ESTD1000nM_LILY_fiaDIA_posneg_3	Sample1	D:\USER DATA\2020\KW-11\200310_HS_RP-FIA_20DONORS_FINAL	C:\Xcalibur\methods\Harald\FlowInjectionAnalysis\200309_10min_01_0005_025_01mlmin_25u_DIAposneg		R:A6	25		0	0	0	1
Unknown	QC_ESTD10000nM_LILY_fiaDIA_posneg_3	Sample1	D:\USER DATA\2020\KW-11\200310_HS_RP-FIA_20DONORS_FINAL	C:\Xcalibur\methods\Harald\FlowInjectionAnalysis\200309_10min_01_0005_025_01mlmin_25u_DIAposneg		R:A7	25		0	0	0	1
Unknown	Blank_Solvent_no_fiaDIA_posneg_6	Sample1	D:\USER DATA\2020\KW-11\200310_HS_RP-FIA_20DONORS_FINAL	C:\Xcalibur\methods\Harald\FlowInjectionAnalysis\200309_10min_01_0005_025_01mlmin_25u_DIAposneg		R:A1	25		0	0	0	1
Unknown	Blank_Solvent_no_rpMS1_posneg_14_switch	Sample1	D:\USER DATA\2020\KW-11\200310_HS_RP-FIA_20DONORS_FINAL	C:\Xcalibur\methods\Harald\RP_23min\200303_Lipid_RP23min_posneg_FullMS		R:A1	2		0	0	0	1
Unknown	plasma_Female09_LILY_rpMS1_posneg_3_Splash	Sample1	D:\USER DATA\2020\KW-11\200310_HS_RP-FIA_20DONORS_FINAL	C:\Xcalibur\methods\Harald\RP_23min\200303_Lipid_RP23min_posneg_FullMS		R:E9	2		0	0	0	1
Unknown	plasma_Male09_LILY_rpMS1_posneg_3_Splash	Sample1	D:\USER DATA\2020\KW-11\200310_HS_RP-FIA_20DONORS_FINAL	C:\Xcalibur\methods\Harald\RP_23min\200303_Lipid_RP23min_posneg_FullMS		R:D9	2		0	0	0	1
Unknown	plasma_Male05_LILY_rpMS1_posneg_1_Splash	Sample1	D:\USER DATA\2020\KW-11\200310_HS_RP-FIA_20DONORS_FINAL	C:\Xcalibur\methods\Harald\RP_23min\200303_Lipid_RP23min_posneg_FullMS		R:D5	2		0	0	0	1
Unknown	plasma_Female05_LILY_rpMS1_posneg_2_Splash	Sample1	D:\USER DATA\2020\KW-11\200310_HS_RP-FIA_20DONORS_FINAL	C:\Xcalibur\methods\Harald\RP_23min\200303_Lipid_RP23min_posneg_FullMS		R:E5	2		0	0	0	1
Unknown	plasma_Male02_LILY_rpMS1_posneg_2_Splash	Sample1	D:\USER DATA\2020\KW-11\200310_HS_RP-FIA_20DONORS_FINAL	C:\Xcalibur\methods\Harald\RP_23min\200303_Lipid_RP23min_posneg_FullMS		R:D2	2		0	0	0	1
Unknown	plasma_Female04_LILY_rpMS1_posneg_1_Splash	Sample1	D:\USER DATA\2020\KW-11\200310_HS_RP-FIA_20DONORS_FINAL	C:\Xcalibur\methods\Harald\RP_23min\200303_Lipid_RP23min_posneg_FullMS		R:E4	2		0	0	0	1
Unknown	plasma_Female01_LILY_rpMS1_posneg_3_Splash	Sample1	D:\USER DATA\2020\KW-11\200310_HS_RP-FIA_20DONORS_FINAL	C:\Xcalibur\methods\Harald\RP_23min\200303_Lipid_RP23min_posneg_FullMS		R:E1	2		0	0	0	1
Unknown	plasma_Female07_LILY_rpMS1_posneg_1_Splash	Sample1	D:\USER DATA\2020\KW-11\200310_HS_RP-FIA_20DONORS_FINAL	C:\Xcalibur\methods\Harald\RP_23min\200303_Lipid_RP23min_posneg_FullMS		R:E7	2		0	0	0	1
Unknown	plasma_Female08_LILY_rpMS1_posneg_2_Splash	Sample1	D:\USER DATA\2020\KW-11\200310_HS_RP-FIA_20DONORS_FINAL	C:\Xcalibur\methods\Harald\RP_23min\200303_Lipid_RP23min_posneg_FullMS		R:E8	2		0	0	0	1
Unknown	plasma_Male05_LILY_rpMS1_posneg_2_Splash	Sample1	D:\USER DATA\2020\KW-11\200310_HS_RP-FIA_20DONORS_FINAL	C:\Xcalibur\methods\Harald\RP_23min\200303_Lipid_RP23min_posneg_FullMS		R:D5	2		0	0	0	1
Unknown	plasma_Male09_LILY_rpMS1_posneg_1_Splash	Sample1	D:\USER DATA\2020\KW-11\200310_HS_RP-FIA_20DONORS_FINAL	C:\Xcalibur\methods\Harald\RP_23min\200303_Lipid_RP23min_posneg_FullMS		R:D9	2		0	0	0	1
Unknown	plasma_Female08_LILY_rpMS1_posneg_3_Splash	Sample1	D:\USER DATA\2020\KW-11\200310_HS_RP-FIA_20DONORS_FINAL	C:\Xcalibur\methods\Harald\RP_23min\200303_Lipid_RP23min_posneg_FullMS		R:E8	2		0	0	0	1
Unknown	plasma_Male05_LILY_rpMS1_posneg_3_Splash	Sample1	D:\USER DATA\2020\KW-11\200310_HS_RP-FIA_20DONORS_FINAL	C:\Xcalibur\methods\Harald\RP_23min\200303_Lipid_RP23min_posneg_FullMS		R:D5	2		0	0	0	1
Unknown	plasma_Male04_LILY_rpMS1_posneg_2_Splash	Sample1	D:\USER DATA\2020\KW-11\200310_HS_RP-FIA_20DONORS_FINAL	C:\Xcalibur\methods\Harald\RP_23min\200303_Lipid_RP23min_posneg_FullMS		R:D4	2		0	0	0	1
Unknown	plasma_Female01_LILY_rpMS1_posneg_1_Splash	Sample1	D:\USER DATA\2020\KW-11\200310_HS_RP-FIA_20DONORS_FINAL	C:\Xcalibur\methods\Harald\RP_23min\200303_Lipid_RP23min_posneg_FullMS		R:E1	2		0	0	0	1
Unknown	plasma_pool_LILY_rpMS1_posneg_1_Splash	Sample1	D:\USER DATA\2020\KW-11\200310_HS_RP-FIA_20DONORS_FINAL	C:\Xcalibur\methods\Harald\RP_23min\200303_Lipid_RP23min_posneg_FullMS		R:A9	2		0	0	0	1
Unknown	plasma_pool_LILY_rpMS1_posneg_2_Splash	Sample1	D:\USER DATA\2020\KW-11\200310_HS_RP-FIA_20DONORS_FINAL	C:\Xcalibur\methods\Harald\RP_23min\200303_Lipid_RP23min_posneg_FullMS		R:A9	2		0	0	0	1
Unknown	plasma_pool_LILY_rpMS1_posneg_3_Splash	Sample1	D:\USER DATA\2020\KW-11\200310_HS_RP-FIA_20DONORS_FINAL	C:\Xcalibur\methods\Harald\RP_23min\200303_Lipid_RP23min_posneg_FullMS		R:A9	2		0	0	0	1
Unknown	Blank_Solvent_no_rpMS1_posneg_15	Sample1	D:\USER DATA\2020\KW-11\200310_HS_RP-FIA_20DONORS_FINAL	C:\Xcalibur\methods\Harald\RP_23min\200303_Lipid_RP23min_posneg_FullMS		R:A1	2		0	0	0	1
Unknown	plasma_SRM_LILY_rpMS1_posneg_6_Splash	Sample1	D:\USER DATA\2020\KW-11\200310_HS_RP-FIA_20DONORS_FINAL	C:\Xcalibur\methods\Harald\RP_23min\200303_Lipid_RP23min_posneg_FullMS		R:A3	2		0	0	0	1
Unknown	Blank_Solvent_no_rpMS1_posneg_16	Sample1	D:\USER DATA\2020\KW-11\200310_HS_RP-FIA_20DONORS_FINAL	C:\Xcalibur\methods\Harald\RP_23min\200303_Lipid_RP23min_posneg_FullMS		R:A1	2		0	0	0	1
Unknown	QC_ESTD10nM_LILY_rpMS1_posneg_3	Sample1	D:\USER DATA\2020\KW-11\200310_HS_RP-FIA_20DONORS_FINAL	C:\Xcalibur\methods\Harald\RP_23min\200303_Lipid_RP23min_posneg_FullMS		R:A4	2		0	0	0	1
Unknown	QC_ESTD100nM_LILY_rpMS1_posneg_3	Sample1	D:\USER DATA\2020\KW-11\200310_HS_RP-FIA_20DONORS_FINAL	C:\Xcalibur\methods\Harald\RP_23min\200303_Lipid_RP23min_posneg_FullMS		R:A5	2		0	0	0	1
Unknown	QC_ESTD1000nM_LILY_rpMS1_posneg_3	Sample1	D:\USER DATA\2020\KW-11\200310_HS_RP-FIA_20DONORS_FINAL	C:\Xcalibur\methods\Harald\RP_23min\200303_Lipid_RP23min_posneg_FullMS		R:A6	2		0	0	0	1
Unknown	QC_ESTD10000nM_LILY_rpMS1_posneg_3	Sample1	D:\USER DATA\2020\KW-11\200310_HS_RP-FIA_20DONORS_FINAL	C:\Xcalibur\methods\Harald\RP_23min\200303_Lipid_RP23min_posneg_FullMS		R:A7	2		0	0	0	1
Unknown	Blank_Solvent_no_rpMS1_posneg_17	Sample1	D:\USER DATA\2020\KW-11\200310_HS_RP-FIA_20DONORS_FINAL	C:\Xcalibur\methods\Harald\RP_23min\200303_Lipid_RP23min_posneg_FullMS		R:A1	2		0	0	0	1
Unknown	Blank_ISTD_LILY_rpMS1_posneg_1	Sample1	D:\USER DATA\2020\KW-11\200310_HS_RP-FIA_20DONORS_FINAL	C:\Xcalibur\methods\Harald\RP_23min\200303_Lipid_RP23min_posneg_FullMS		R:B1	2		0	0	0	1
Unknown	Blank_ISTD_LILY_rpMS1_posneg_2	Sample1	D:\USER DATA\2020\KW-11\200310_HS_RP-FIA_20DONORS_FINAL	C:\Xcalibur\methods\Harald\RP_23min\200303_Lipid_RP23min_posneg_FullMS		R:B1	2		0	0	0	1
Unknown	Blank_ISTD_LILY_rpMS1_posneg_3	Sample1	D:\USER DATA\2020\KW-11\200310_HS_RP-FIA_20DONORS_FINAL	C:\Xcalibur\methods\Harald\RP_23min\200303_Lipid_RP23min_posneg_FullMS		R:B1	2		0	0	0	1
Unknown	ESTD_1_LILY_rpMS1_posneg_1	Sample1	D:\USER DATA\2020\KW-11\200310_HS_RP-FIA_20DONORS_FINAL	C:\Xcalibur\methods\Harald\RP_23min\200303_Lipid_RP23min_posneg_FullMS		R:B2	2		0	0	0	1
Unknown	ESTD_1_LILY_rpMS1_posneg_2	Sample1	D:\USER DATA\2020\KW-11\200310_HS_RP-FIA_20DONORS_FINAL	C:\Xcalibur\methods\Harald\RP_23min\200303_Lipid_RP23min_posneg_FullMS		R:B2	2		0	0	0	1
Unknown	ESTD_1_LILY_rpMS1_posneg_3	Sample1	D:\USER DATA\2020\KW-11\200310_HS_RP-FIA_20DONORS_FINAL	C:\Xcalibur\methods\Harald\RP_23min\200303_Lipid_RP23min_posneg_FullMS		R:B2	2		0	0	0	1
Unknown	ESTD_1_LILY_rpMS1_posneg_4	Sample1	D:\USER DATA\2020\KW-11\200310_HS_RP-FIA_20DONORS_FINAL	C:\Xcalibur\methods\Harald\RP_23min\200303_Lipid_RP23min_posneg_FullMS		R:B2	2		0	0	0	1
Unknown	ESTD_1_LILY_rpMS1_posneg_5	Sample1	D:\USER DATA\2020\KW-11\200310_HS_RP-FIA_20DONORS_FINAL	C:\Xcalibur\methods\Harald\RP_23min\200303_Lipid_RP23min_posneg_FullMS		R:B2	2		0	0	0	1
Unknown	ESTD_1_LILY_rpMS1_posneg_6	Sample1	D:\USER DATA\2020\KW-11\200310_HS_RP-FIA_20DONORS_FINAL	C:\Xcalibur\methods\Harald\RP_23min\200303_Lipid_RP23min_posneg_FullMS		R:B2	2		0	0	0	1
Unknown	ESTD_5_LILY_rpMS1_posneg_1	Sample1	D:\USER DATA\2020\KW-11\200310_HS_RP-FIA_20DONORS_FINAL	C:\Xcalibur\methods\Harald\RP_23min\200303_Lipid_RP23min_posneg_FullMS		R:B3	2		0	0	0	1
Unknown	ESTD_10_LILY_rpMS1_posneg_1	Sample1	D:\USER DATA\2020\KW-11\200310_HS_RP-FIA_20DONORS_FINAL	C:\Xcalibur\methods\Harald\RP_23min\200303_Lipid_RP23min_posneg_FullMS		R:B4	2		0	0	0	1
Unknown	ESTD_10_LILY_rpMS1_posneg_2	Sample1	D:\USER DATA\2020\KW-11\200310_HS_RP-FIA_20DONORS_FINAL	C:\Xcalibur\methods\Harald\RP_23min\200303_Lipid_RP23min_posneg_FullMS		R:B4	2		0	0	0	1
Unknown	ESTD_10_LILY_rpMS1_posneg_3	Sample1	D:\USER DATA\2020\KW-11\200310_HS_RP-FIA_20DONORS_FINAL	C:\Xcalibur\methods\Harald\RP_23min\200303_Lipid_RP23min_posneg_FullMS		R:B4	2		0	0	0	1
Unknown	ESTD_10_LILY_rpMS1_posneg_4	Sample1	D:\USER DATA\2020\KW-11\200310_HS_RP-FIA_20DONORS_FINAL	C:\Xcalibur\methods\Harald\RP_23min\200303_Lipid_RP23min_posneg_FullMS		R:B4	2		0	0	0	1
Unknown	ESTD_10_LILY_rpMS1_posneg_5	Sample1	D:\USER DATA\2020\KW-11\200310_HS_RP-FIA_20DONORS_FINAL	C:\Xcalibur\methods\Harald\RP_23min\200303_Lipid_RP23min_posneg_FullMS		R:B4	2		0	0	0	1
Unknown	ESTD_10_LILY_rpMS1_posneg_6	Sample1	D:\USER DATA\2020\KW-11\200310_HS_RP-FIA_20DONORS_FINAL	C:\Xcalibur\methods\Harald\RP_23min\200303_Lipid_RP23min_posneg_FullMS		R:B4	2		0	0	0	1
Unknown	ESTD_25_LILY_rpMS1_posneg_1	Sample1	D:\USER DATA\2020\KW-11\200310_HS_RP-FIA_20DONORS_FINAL	C:\Xcalibur\methods\Harald\RP_23min\200303_Lipid_RP23min_posneg_FullMS		R:B5	2		0	0	0	1
Unknown	ESTD_50_LILY_rpMS1_posneg_1	Sample1	D:\USER DATA\2020\KW-11\200310_HS_RP-FIA_20DONORS_FINAL	C:\Xcalibur\methods\Harald\RP_23min\200303_Lipid_RP23min_posneg_FullMS		R:B6	2		0	0	0	1
Unknown	ESTD_75_LILY_rpMS1_posneg_1	Sample1	D:\USER DATA\2020\KW-11\200310_HS_RP-FIA_20DONORS_FINAL	C:\Xcalibur\methods\Harald\RP_23min\200303_Lipid_RP23min_posneg_FullMS		R:B7	2		0	0	0	1
Unknown	ESTD_100_LILY_rpMS1_posneg_1	Sample1	D:\USER DATA\2020\KW-11\200310_HS_RP-FIA_20DONORS_FINAL	C:\Xcalibur\methods\Harald\RP_23min\200303_Lipid_RP23min_posneg_FullMS		R:B8	2		0	0	0	1
Unknown	ESTD_100_LILY_rpMS1_posneg_2	Sample1	D:\USER DATA\2020\KW-11\200310_HS_RP-FIA_20DONORS_FINAL	C:\Xcalibur\methods\Harald\RP_23min\200303_Lipid_RP23min_posneg_FullMS		R:B8	2		0	0	0	1
Unknown	ESTD_100_LILY_rpMS1_posneg_3	Sample1	D:\USER DATA\2020\KW-11\200310_HS_RP-FIA_20DONORS_FINAL	C:\Xcalibur\methods\Harald\RP_23min\200303_Lipid_RP23min_posneg_FullMS		R:B8	2		0	0	0	1
Unknown	ESTD_100_LILY_rpMS1_posneg_4	Sample1	D:\USER DATA\2020\KW-11\200310_HS_RP-FIA_20DONORS_FINAL	C:\Xcalibur\methods\Harald\RP_23min\200303_Lipid_RP23min_posneg_FullMS		R:B8	2		0	0	0	1
Unknown	ESTD_100_LILY_rpMS1_posneg_5	Sample1	D:\USER DATA\2020\KW-11\200310_HS_RP-FIA_20DONORS_FINAL	C:\Xcalibur\methods\Harald\RP_23min\200303_Lipid_RP23min_posneg_FullMS		R:B8	2		0	0	0	1
Unknown	ESTD_100_LILY_rpMS1_posneg_6	Sample1	D:\USER DATA\2020\KW-11\200310_HS_RP-FIA_20DONORS_FINAL	C:\Xcalibur\methods\Harald\RP_23min\200303_Lipid_RP23min_posneg_FullMS		R:B8	2		0	0	0	1
Unknown	ESTD_250_LILY_rpMS1_posneg_1	Sample1	D:\USER DATA\2020\KW-11\200310_HS_RP-FIA_20DONORS_FINAL	C:\Xcalibur\methods\Harald\RP_23min\200303_Lipid_RP23min_posneg_FullMS		R:B9	2		0	0	0	1
Unknown	ESTD_500_LILY_rpMS1_posneg_1	Sample1	D:\USER DATA\2020\KW-11\200310_HS_RP-FIA_20DONORS_FINAL	C:\Xcalibur\methods\Harald\RP_23min\200303_Lipid_RP23min_posneg_FullMS		R:C1	2		0	0	0	1
Unknown	ESTD_750_LILY_rpMS1_posneg_1	Sample1	D:\USER DATA\2020\KW-11\200310_HS_RP-FIA_20DONORS_FINAL	C:\Xcalibur\methods\Harald\RP_23min\200303_Lipid_RP23min_posneg_FullMS		R:C2	2		0	0	0	1
Unknown	ESTD_1000_LILY_rpMS1_posneg_1	Sample1	D:\USER DATA\2020\KW-11\200310_HS_RP-FIA_20DONORS_FINAL	C:\Xcalibur\methods\Harald\RP_23min\200303_Lipid_RP23min_posneg_FullMS		R:C3	2		0	0	0	1
Unknown	ESTD_5000_LILY_rpMS1_posneg_1	Sample1	D:\USER DATA\2020\KW-11\200310_HS_RP-FIA_20DONORS_FINAL	C:\Xcalibur\methods\Harald\RP_23min\200303_Lipid_RP23min_posneg_FullMS		R:C4	2		0	0	0	1
Unknown	ESTD_10000_LILY_rpMS1_posneg_1	Sample1	D:\USER DATA\2020\KW-11\200310_HS_RP-FIA_20DONORS_FINAL	C:\Xcalibur\methods\Harald\RP_23min\200303_Lipid_RP23min_posneg_FullMS		R:C5	2		0	0	0	1
Unknown	ESTD_25000_LILY_rpMS1_posneg_1	Sample1	D:\USER DATA\2020\KW-11\200310_HS_RP-FIA_20DONORS_FINAL	C:\Xcalibur\methods\Harald\RP_23min\200303_Lipid_RP23min_posneg_FullMS		R:C6	2		0	0	0	1
Unknown	Blank_Solvent_no_rpMS1_posneg_18	Sample1	D:\USER DATA\2020\KW-11\200310_HS_RP-FIA_20DONORS_FINAL	C:\Xcalibur\methods\Harald\RP_23min\200303_Lipid_RP23min_posneg_FullMS		R:A1	2		0	0	0	1
Unknown	plasma_SRM_LILY_rpMS1_posneg_7_Splash	Sample1	D:\USER DATA\2020\KW-11\200310_HS_RP-FIA_20DONORS_FINAL	C:\Xcalibur\methods\Harald\RP_23min\200303_Lipid_RP23min_posneg_FullMS		R:A3	2		0	0	0	1
Unknown	Blank_Solvent_no_fiaDIA_posneg_7_switch	Sample1	D:\USER DATA\2020\KW-11\200310_HS_RP-FIA_20DONORS_FINAL	C:\Xcalibur\methods\Harald\FlowInjectionAnalysis\200309_10min_01_0005_025_01mlmin_25u_DIAposneg		R:A1	25		0	0	0	1
Unknown	QC_ESTD10nM_LILY_fiaDIA_posneg_4	Sample1	D:\USER DATA\2020\KW-11\200310_HS_RP-FIA_20DONORS_FINAL	C:\Xcalibur\methods\Harald\FlowInjectionAnalysis\200309_10min_01_0005_025_01mlmin_25u_DIAposneg		R:A4	25		0	0	0	1
Unknown	QC_ESTD100nM_LILY_fiaDIA_posneg_4	Sample1	D:\USER DATA\2020\KW-11\200310_HS_RP-FIA_20DONORS_FINAL	C:\Xcalibur\methods\Harald\FlowInjectionAnalysis\200309_10min_01_0005_025_01mlmin_25u_DIAposneg		R:A5	25		0	0	0	1
Unknown	QC_ESTD1000nM_LILY_fiaDIA_posneg_4	Sample1	D:\USER DATA\2020\KW-11\200310_HS_RP-FIA_20DONORS_FINAL	C:\Xcalibur\methods\Harald\FlowInjectionAnalysis\200309_10min_01_0005_025_01mlmin_25u_DIAposneg		R:A6	25		0	0	0	1
Unknown	QC_ESTD10000nM_LILY_fiaDIA_posneg_4	Sample1	D:\USER DATA\2020\KW-11\200310_HS_RP-FIA_20DONORS_FINAL	C:\Xcalibur\methods\Harald\FlowInjectionAnalysis\200309_10min_01_0005_025_01mlmin_25u_DIAposneg		R:A7	25		0	0	0	1
Unknown	Blank_Solvent_no_fiaDIA_posneg_8	Sample1	D:\USER DATA\2020\KW-11\200310_HS_RP-FIA_20DONORS_FINAL	C:\Xcalibur\methods\Harald\FlowInjectionAnalysis\200309_10min_01_0005_025_01mlmin_25u_DIAposneg		R:A1	25		0	0	0	1
Unknown	Blank_Solvent_no_rpMS1_posneg_19_switch	Sample1	D:\USER DATA\2020\KW-11\200310_HS_RP-FIA_20DONORS_FINAL	C:\Xcalibur\methods\Harald\RP_23min\200303_Lipid_RP23min_posneg_FullMS		R:A1	2		0	0	0	1
Unknown	Blank_Extr_LILY_rpDDA_pos_1	Sample1	D:\USER DATA\2020\KW-11\200310_HS_RP-FIA_20DONORS_FINAL	C:\Xcalibur\methods\Harald\RP_23min\200303_Lipid_RP23min_pos_ddMS2		R:A8	5		0	0	0	1
Unknown	Blank_Extr_LILY_rpDDA_pos_2	Sample1	D:\USER DATA\2020\KW-11\200310_HS_RP-FIA_20DONORS_FINAL	C:\Xcalibur\methods\Harald\RP_23min\200303_Lipid_RP23min_pos_ddMS2		R:A8	5		0	0	0	1
Unknown	Blank_Extr_LILY_rpDDA_pos_3	Sample1	D:\USER DATA\2020\KW-11\200310_HS_RP-FIA_20DONORS_FINAL	C:\Xcalibur\methods\Harald\RP_23min\200303_Lipid_RP23min_pos_ddMS2		R:A8	5		0	0	0	1
Unknown	ESTD_25000_LILY_rpDDA_pos_1	Sample1	D:\USER DATA\2020\KW-11\200310_HS_RP-FIA_20DONORS_FINAL	C:\Xcalibur\methods\Harald\RP_23min\200303_Lipid_RP23min_pos_ddMS2		R:C6	5		0	0	0	1
Unknown	ESTD_25000_LILY_rpDDA_pos_2	Sample1	D:\USER DATA\2020\KW-11\200310_HS_RP-FIA_20DONORS_FINAL	C:\Xcalibur\methods\Harald\RP_23min\200303_Lipid_RP23min_pos_ddMS2		R:C6	5		0	0	0	1
Unknown	ESTD_25000_LILY_rpDDA_pos_3	Sample1	D:\USER DATA\2020\KW-11\200310_HS_RP-FIA_20DONORS_FINAL	C:\Xcalibur\methods\Harald\RP_23min\200303_Lipid_RP23min_pos_ddMS2		R:C6	5		0	0	0	1
Unknown	plasma_pool_LILY_rpDDA_pos_1_Splash	Sample1	D:\USER DATA\2020\KW-11\200310_HS_RP-FIA_20DONORS_FINAL	C:\Xcalibur\methods\Harald\RP_23min\200303_Lipid_RP23min_pos_ddMS2		R:A9	5		0	0	0	1
Unknown	plasma_pool_LILY_rpDDA_pos_2_Splash	Sample1	D:\USER DATA\2020\KW-11\200310_HS_RP-FIA_20DONORS_FINAL	C:\Xcalibur\methods\Harald\RP_23min\200303_Lipid_RP23min_pos_ddMS2		R:A9	5		0	0	0	1
Unknown	plasma_pool_LILY_rpDDA_pos_3_Splash	Sample1	D:\USER DATA\2020\KW-11\200310_HS_RP-FIA_20DONORS_FINAL	C:\Xcalibur\methods\Harald\RP_23min\200303_Lipid_RP23min_pos_ddMS2		R:A9	5		0	0	0	1
Unknown	Blank_Extr_LILY_rpDDA_neg_1	Sample1	D:\USER DATA\2020\KW-11\200310_HS_RP-FIA_20DONORS_FINAL	C:\Xcalibur\methods\Harald\RP_23min\200303_Lipid_RP23min_neg_ddMS2		R:A8	5		0	0	0	1
Unknown	Blank_Extr_LILY_rpDDA_neg_2	Sample1	D:\USER DATA\2020\KW-11\200310_HS_RP-FIA_20DONORS_FINAL	C:\Xcalibur\methods\Harald\RP_23min\200303_Lipid_RP23min_neg_ddMS2		R:A8	5		0	0	0	1
Unknown	Blank_Extr_LILY_rpDDA_neg_3	Sample1	D:\USER DATA\2020\KW-11\200310_HS_RP-FIA_20DONORS_FINAL	C:\Xcalibur\methods\Harald\RP_23min\200303_Lipid_RP23min_neg_ddMS2		R:A8	5		0	0	0	1
Unknown	ESTD_25000_LILY_rpDDA_neg_1	Sample1	D:\USER DATA\2020\KW-11\200310_HS_RP-FIA_20DONORS_FINAL	C:\Xcalibur\methods\Harald\RP_23min\200303_Lipid_RP23min_neg_ddMS2		R:C6	5		0	0	0	1
Unknown	ESTD_25000_LILY_rpDDA_neg_2	Sample1	D:\USER DATA\2020\KW-11\200310_HS_RP-FIA_20DONORS_FINAL	C:\Xcalibur\methods\Harald\RP_23min\200303_Lipid_RP23min_neg_ddMS2		R:C6	5		0	0	0	1
Unknown	ESTD_25000_LILY_rpDDA_neg_3	Sample1	D:\USER DATA\2020\KW-11\200310_HS_RP-FIA_20DONORS_FINAL	C:\Xcalibur\methods\Harald\RP_23min\200303_Lipid_RP23min_neg_ddMS2		R:C6	5		0	0	0	1
[truncated: 19 more rows]

## Sheet: List of ESTD
Name
AcCa 18:1
AcCa 6:0
BMP 36:2
Carotine
CE 16:0
CE 18:0
[truncated: 71 more rows]
